# Supplementary material for: PARP1 inhibitors trigger innate immunity via PARP1 trapping-induced DNA damage response
Source: eLife. 2020 Aug 26;9:e60637. doi: 10.7554/eLife.60637 (PMC7486119; doi:10.7554/eLife.60637)
Supplement: Supplementary file 1. [file elife-60637-supp1.xlsx]

## Sheet: Chiho_Ewing_Tala_Jan_2019 (1)
							RAW
							set I			set II
							DMSO	Tala 0.1 uM	Tala 1 uM	Tala 1 uM	Tala 0.1 uM	DMSO
Protein Id	Gene Symbol	Description	Group ID	Number of peptides	Collapsed	Parsimony	default~rq_126_sn sum	default~rq_127_sn sum	default~rq_128_sn sum	default~rq_129_sn sum	default~rq_130_sn sum	default~rq_131_sn sum
IPI:IPI00759472.1	INCENP	Isoform 2 of Inner centromere protein	0	71	C	UR	13410.3	16087.3	15712.8	15475.6	19384.7	18140.7
IPI:IPI00003918.6	RPL4	60S ribosomal protein L4	1	243	C	UR	64849.8	56332.4	64951.4	66973.2	58941.7	56310.1
IPI:IPI00045914.1	SPEN	Msx2-interacting protein	1	119	C	UR	27763.5	30008.9	31883.5	36104.2	34361.9	31411
IPI:IPI00887893.1	LOC100131244	hypothetical protein	2	2	C	UR	220.837	559.412	391.292	243.147	275.712	332.78
IPI:IPI00395474.1	SAMD1	Atherin	3	41	C	UR	6866.31	7072.23	7618.93	6523.39	7982.24	8600.23
IPI:IPI00008728.1	CLPX	ATP-dependent Clp protease ATP-binding subunit clpX-like, mitochondrial	4	77	C	UR	27550.9	22224.3	24955.5	25671.9	28563.1	25379.6
IPI:IPI00022225.3	C19orf29	Isoform 2 of Uncharacterized protein C19orf29	5	30	C	UR	7676.62	8415.13	8642.26	12913.8	10161.5	8603.12
IPI:IPI00604620.3	NCL	Nucleolin	6	720	C	UR	157641	242511	225795	267496	195231	162628
IPI:IPI00916188.1	NCL	32 kDa protein	6	3	C	UR	199.423	417.397	498.357	527.813	539.883	229.116
IPI:IPI00607591.3	RAP1GDS1	Isoform 1 of Rap1 GTPase-GDP dissociation stimulator 1	6	102	C	UR	23988	21829.2	21231.5	47502.2	43028.9	25110.3
IPI:IPI00855727.1	RAP1GDS1	RAP1, GTP-GDP dissociation stimulator 1 isoform 2	6	4	C	UR	615.386	543.199	615.731	886.616	907.441	658.068
IPI:IPI00783859.2	VPS13D	Isoform 2 of Vacuolar protein sorting-associated protein 13D	6	21	C	UR	3954.78	3697.49	3888.17	3244.57	3951.75	4713.4
IPI:IPI00300990.5	C1orf77	Isoform 1 of Uncharacterized protein C1orf77	6	31	C	UR	8964.17	8366.94	7514.11	7876.68	9494.02	9180.46
IPI:IPI00414629.2	UNC119B	Protein unc-119 homolog B	7	27	C	UR	8420.5	8445.11	9479.72	9970.15	10439.2	11885.2
IPI:IPI00013262.1	UNC119	Isoform A of Protein unc-119 homolog A	7	13	C	UR	4120.12	3990.21	4549.37	3134.99	3692.09	4717.89
IPI:IPI00021626.2	RBM42	Isoform 1 of RNA-binding protein 42	8	34	C	UR	7208.73	6196.05	6390.56	6932.85	6845.04	7347.61
IPI:IPI00465044.2	RCC2	Protein RCC2	9	302	C	UR	42703.1	54042.3	56884.6	61615	60363.5	71822.8
IPI:IPI00072534.2	UNC45A	Isoform 1 of Protein unc-45 homolog A	10	117	C	UR	36410.3	32603.3	34828.6	35221.9	39057.4	41826.6
IPI:IPI00009946.4	TOMM34	Mitochondrial import receptor subunit TOM34	10	63	C	UR	17599.8	19316.6	22498.8	21034	21016.6	18211.6
IPI:IPI00514622.2	RANBP6	Ran-binding protein 6	11	40	C	UR	7735.08	9939.16	14544.5	11184.1	9043.53	8040.73
IPI:IPI00793443.1	IPO5	importin 5	11	303	C	UR	52958	60517.2	92843.8	70924.2	48735	47442.1
IPI:IPI00032491.1	LEMD3	Inner nuclear membrane protein Man1	12	57	C	UR	12167.2	11579.7	12364.9	11211.8	11282.2	13084.9
IPI:IPI00018251.1	NCOA2	Nuclear receptor coactivator 2	13	18	C	UR	5673.04	6149.68	5561.9	5584.34	6707.04	7374.18
IPI:IPI00220079.1	NCOA3	Isoform 2 of Nuclear receptor coactivator 3	13	17	C	UR	4448.4	4020.86	3743.29	4123.21	3959	3906.12
IPI:IPI00470490.2	NCOA1	Isoform 1 of Nuclear receptor coactivator 1	13	11	C	UR	2757.89	2005.09	2234.28	2072.87	2604.93	2403.74
IPI:IPI00187011.4	ZC3H4	Zinc finger CCCH domain-containing protein 4	14	86	C	UR	15080.7	16554.7	17502.4	18766.8	16117.3	16432.4
IPI:IPI00384456.4	MSH6	Isoform GTBP-N of DNA mismatch repair protein Msh6	15	221	C	UR	61077.3	54503.2	56775.6	58056.6	54819.3	52724.1
IPI:IPI00329605.5	MSH3	DNA mismatch repair protein Msh3	15	72	C	UR	18917.7	17099.7	19304.7	23854.9	24641.3	25847.9
IPI:IPI00003016.4	STRN4	Striatin-4	16	44	C	UR	8218.81	7581.27	9183.08	8731.59	8804.59	9150.77
IPI:IPI00014456.4	STRN	Isoform 1 of Striatin	16	98	C	UR	29080	22802.2	21954.7	20654.9	22198.8	25375.1
IPI:IPI00011461.5	STRN3	Isoform Beta of Striatin-3	16	48	C	UR	12637.6	13985.9	13473.5	11109.7	14806.8	16723.3
IPI:IPI00166976.3	LACE1	Lactation elevated protein 1	16	5	C	UR	1601.58	1111.47	1127.01	967.831	1062.21	1341.19
IPI:IPI00401051.3	ZCCHC4	Zinc finger CCHC domain-containing protein 4	16	3	C	UR	634.873	619.244	791.246	643.367	726.716	757.561
IPI:IPI00164286.7	TRIT1	Isoform 4 of tRNA isopentenyltransferase, mitochondrial	16	15	C	UR	3919.54	5408.83	5057.59	4001.16	3261.06	3553.12
IPI:IPI00221178.1	TPD52L2	Isoform 2 of Tumor protein D54	16	77	C	UR	31633.5	25834.1	27751.8	28388.7	18368.8	21479.1
IPI:IPI00619951.3	TPD52	tumor protein D52 isoform 2	16	59	C	UR	17154.5	14748.3	12179.8	15443	15715.8	19141.1
IPI:IPI00383670.3	TPD52L1	Isoform 1 of Tumor protein D53	16	39	C	UR	35173.6	25579	5885.04	4997.2	6992.1	8379.68
IPI:IPI00399265.2	TPD52L2	tumor protein D52-like 2 isoform a	16	8	C	UR	3047.7	2836.14	2556.11	2979	1821.43	2078.34
IPI:IPI00234252.3	SMARCC1	SWI/SNF complex subunit SMARCC1	16	158	C	UR	30946.1	37839.5	41872.6	51420.1	49983.8	55232
IPI:IPI00150057.6	SMARCC2	Isoform 2 of SWI/SNF complex subunit SMARCC2	16	194	C	UR	40573.1	51539.6	49269.3	48603.1	57555.1	67276.6
IPI:IPI00216047.3	SMARCC2	Isoform 1 of SWI/SNF complex subunit SMARCC2	16	10	C	UR	1747.8	2222.94	2079.33	2079.24	2324.88	2547.12
IPI:IPI00304925.5	HSPA1A;HSPA1B	Heat shock 70 kDa protein 1	16	314	C	UR	133714	95462.4	67828.2	52458.4	52448.2	61575.4
IPI:IPI00845339.1	HSPA1A;HSPA1B	cDNA FLJ54392, highly similar to Heat shock 70 kDa protein 1	16	4	C	UR	10789.9	8093.77	595.162	490.307	459.961	486.947
IPI:IPI00911039.1	-	cDNA FLJ54408, highly similar to Heat shock 70 kDa protein 1	16	5	C	UR	2348.18	1645.13	1095.29	930.826	894.604	976.486
IPI:IPI00003362.2	HSPA5	HSPA5 protein	16	683	C	UR	142955	161870	208569	163660	148971	158874
IPI:IPI00328905.6	IQGAP3	Ras GTPase-activating-like protein IQGAP3	16	74	C	UR	24493.1	20167.7	16960.1	16496	27898	32936.5
IPI:IPI00009342.1	IQGAP1	Ras GTPase-activating-like protein IQGAP1	16	565	C	UR	163587	129070	153775	133072	134730	165264
IPI:IPI00007765.5	HSPA9	Stress-70 protein, mitochondrial	16	641	C	UR	165027	149483	176566	153364	155636	161687
IPI:IPI00003865.1	HSPA8	Isoform 1 of Heat shock cognate 71 kDa protein	16	1473	C	UR	250404	323681	360752	332148	309201	293278
IPI:IPI00007702.1	HSPA2	Heat shock-related 70 kDa protein 2	16	66	C	UR	20042.7	23908.3	23126.6	23149.5	12576.1	13566.4
IPI:IPI00299048.6	IQGAP2	Isoform 1 of Ras GTPase-activating-like protein IQGAP2	16	81	C	UR	13594.6	31899.3	31020	26277.6	24269.5	28142.2
IPI:IPI00217442.2	ANKHD1;ANKHD1-EIF4EBP3;EIF4EBP3	ANKHD1-EIF4EBP3 protein	16	140	C	UR	35257.1	30992.1	32108.1	32358	33252.8	34514.3
IPI:IPI00410680.4	EIF4EBP3;ANKHD1;ANKHD1-EIF4EBP3	Isoform 3 of Ankyrin repeat and KH domain-containing protein 1	16	3	C	UR	1757.46	1345.05	1506.81	1538.7	1654.25	1632.62
IPI:IPI00295502.6	WIZ	Isoform 1 of Protein Wiz	16	49	C	UR	11919.9	13399.7	13996.9	12656.9	12220.1	13490.3
IPI:IPI00922835.1	-	WIZ protein	16	14	C	UR	2446.54	2636.54	2539.57	2335.58	2365.14	2722.49
IPI:IPI00783186.2	ANKRD17	Isoform 2 of Ankyrin repeat domain-containing protein 17	16	63	C	UR	15731.2	15457	13872.8	13609.6	14581.8	15503.6
IPI:IPI00375632.1	RNF216	Isoform 1 of E3 ubiquitin-protein ligase RNF216	16	3	C	UR	422.662	424.266	528.631	382.776	435.881	456.7
IPI:IPI00744710.2	EIF4EBP3	92 kDa protein	16	1	C	UR	127.183	129.49	235.515	183.13	226.913	271.809
IPI:IPI00871620.2	RAPH1	Isoform RMO1-RAPH1 of Ras-associated and pleckstrin homology domains-containing protein 1	16	69	C	UR	26550.3	21574	19804.3	14079	15540.7	17818.5
IPI:IPI00005240.1	NFATC3	Isoform 2 of Nuclear factor of activated T-cells, cytoplasmic 3	16	14	C	UR	3331.96	3565.04	4024.01	5625.64	5780.01	3501.09
IPI:IPI00032069.1	NFATC1	Isoform C-alpha of Nuclear factor of activated T-cells, cytoplasmic 1	16	9	C	UR	1192.35	1411.22	1557.56	1416.15	2204.72	2613.11
IPI:IPI00247309.3	NFATC2	Isoform B of Nuclear factor of activated T-cells, cytoplasmic 2	16	7	C	UR	1951.49	1666.95	1478.9	1645.74	1787.44	1831.91
IPI:IPI00385215.3	NFATC4	Isoform 2 of Nuclear factor of activated T-cells, cytoplasmic 4	16	2	C	UR	215.859	356.183	290.547	221.314	291.767	367.733
IPI:IPI00376219.1	APBB1IP	Amyloid beta A4 precursor protein-binding family B member 1-interacting protein	16	29	C	UR	5695.63	4995.93	5322.37	26413.6	19873.4	5874.66
IPI:IPI00012837.1	KIF5B	Kinesin-1 heavy chain	16	301	C	UR	78444.8	94264.9	97622.6	78897.5	68996.3	77970.3
IPI:IPI00001580.4	FYCO1	Isoform 1 of FYVE and coiled-coil domain-containing protein 1	16	45	C	UR	10115.5	14882.2	14542.3	10047	12681.6	14196
IPI:IPI00783302.1	PTCD3	Isoform 1 of Pentatricopeptide repeat-containing protein 3, mitochondrial	16	70	C	UR	15334.4	12728.4	14612.8	14657.7	13719	12964.3
IPI:IPI00003964.4	USP9X	ubiquitin specific protease 9, X-linked isoform 4	16	169	C	UR	63099.9	49109.4	45735.7	41088.8	46971.6	54536.2
IPI:IPI00008157.4	KIAA1211	Isoform 1 of Uncharacterized protein KIAA1211	16	14	C	UR	2167.57	2855.74	2690	2512.48	4470.88	4379.79
IPI:IPI00219036.5	DICER1	dicer1	16	39	C	UR	13241.9	9950.36	10632.8	11747.3	11878.5	11467
IPI:IPI00029722.4	KIF5A	Kinesin heavy chain isoform 5A	16	2	C	UR	207.185	213.644	261.803	303.742	314.249	363.377
IPI:IPI00031076.4	CCNC	Cyclin-C	16	2	C	UR	1073.29	1054.53	1095.48	797.156	1294.25	1413.12
IPI:IPI00015923.2	CCNDBP1	Isoform 1 of Cyclin-D1-binding protein 1	16	5	C	UR	946.636	957.306	1513.53	1189.23	1094.14	1099.08
IPI:IPI00790550.2	-	SFRS8 protein	16	41	C	UR	9621.65	11812	11679.8	12717.8	11589.4	11283.6
IPI:IPI00414410.2	MRPL22	Isoform 1 of 39S ribosomal protein L22, mitochondrial	16	56	C	UR	14648	14732.7	15567.7	13513.6	14358	13360.9
IPI:IPI00329572.4	PACSIN3	Protein kinase C and casein kinase substrate in neurons protein 3	16	55	C	UR	17387.1	12675.1	12084.4	9888.53	11692.4	13080.3
IPI:IPI00291607.2	ITPR3	Inositol 1,4,5-trisphosphate receptor type 3	16	124	C	UR	41960.7	37253.6	31097.7	26235.3	51826.4	59353.3
IPI:IPI00031545.3	ITPR2	Isoform Long of Inositol 1,4,5-trisphosphate receptor type 2	16	58	C	UR	20858.2	16244.9	16708.8	18015.7	23131.2	23218.4
IPI:IPI00218658.1	ITPR1	Isoform 2 of Inositol 1,4,5-trisphosphate receptor type 1	16	7	C	UR	1996.37	1697.85	1445.2	1706.5	3044.18	2539.65
IPI:IPI00025329.1	RPL19	60S ribosomal protein L19	16	76	C	UR	15848.9	14776.1	17045.7	18121.8	17624.4	17205.8
IPI:IPI00013297.1	PDAP1	28 kDa heat- and acid-stable phosphoprotein	16	74	C	UR	20424.7	18937.4	18147.6	30894.5	17222.3	16082
IPI:IPI00054042.1	GTF2I	Isoform 1 of General transcription factor II-I	16	409	C	UR	91969.1	89738.5	90165	101548	132206	147189
IPI:IPI00657757.1	ZKSCAN1	Zinc finger protein with KRAB and SCAN domains 1	16	21	C	UR	4433.63	4216.78	4425.65	6123.42	7114.89	6826.41
IPI:IPI00026625.1	NUP155	Isoform 1 of Nuclear pore complex protein Nup155	16	155	C	UR	37156.7	34927.9	36832.3	33691.3	35969.5	38168.7
IPI:IPI00011919.1	FADD	Protein FADD	16	19	C	UR	3299.86	3182.66	3596.39	3559.94	2894.03	3358.15
IPI:IPI00215963.5	KIAA0182	Isoform 1 of Genetic suppressor element 1	16	34	C	UR	8795.54	7388.05	6934.72	9601.03	8061.73	6597.27
IPI:IPI00025174.2	SDCCAG10	Isoform 1 of Peptidyl-prolyl cis-trans isomerase SDCCAG10	16	45	C	UR	8641.25	11109.5	10842.4	11560.2	10562.2	10321
IPI:IPI00464988.2	TRIM58	Tripartite motif-containing protein 58	16	7	C	UR	1209.14	1194.64	1344.48	1218.81	4046.52	4201.02
IPI:IPI00644712.4	XRCC6	ATP-dependent DNA helicase 2 subunit 1	16	622	C	UR	104141	125849	133000	156227	166404	153155
IPI:IPI00167368.2	NARG1L	Isoform 1 of NMDA receptor-regulated 1-like protein	16	68	C	UR	20031.5	20039.2	22980	26722.1	24865.4	20840.3
IPI:IPI00386189.2	NARG1	Isoform 1 of NMDA receptor-regulated protein 1	16	219	C	UR	48835	61096	65425.2	71620	66142.6	55152.6
IPI:IPI00400986.6	KIAA1731	Isoform 1 of Leucine-rich repeat-containing protein KIAA1731	16	2	C	UR	191.514	266.189	351.324	337.393	225.423	255.878
IPI:IPI00021146.1	PRPF18	Isoform 1 of Pre-mRNA-splicing factor 18	16	28	C	UR	5739.65	5400.19	6090.25	6755.72	7432.07	7160.97
IPI:IPI00044748.6	FMNL2	Wilm's tumour protein family protein	16	28	C	UR	9288.8	10322.1	10223.4	8021.02	7074.5	7740.83
IPI:IPI00847544.1	FMNL3	Isoform 1 of Formin-like protein 3	16	12	C	UR	2142.69	2934.87	2854.82	2603.51	2341.19	2936.16
IPI:IPI00293009.4	RABEP1	Isoform 1 of Rab GTPase-binding effector protein 1	16	57	C	UR	16063.6	17405.4	17899.4	17206.8	18474.4	21151.4
IPI:IPI00025202.6	FMNL1	Isoform 2 of Formin-like protein 1	16	58	C	UR	10582.3	9671.54	11110.2	41533.8	37416.3	11554.5
IPI:IPI00220503.9	DCTN2	dynactin 2	16	114	C	UR	25420.7	27811.5	27776	27145	25175.3	26475.4
IPI:IPI00295638.3	CNTROB	Isoform 1 of Centrobin	16	1	C	UR	134.506	157.406	137.348	129.894	155.575	162.344
IPI:IPI00010365.4	-	67 kDa protein	16	16	C	UR	4350.53	4457.42	4684	5174.18	5515.23	4939.33
IPI:IPI00477468.1	CTR9	RNA polymerase-associated protein CTR9 homolog	16	101	C	UR	27751.3	30504.3	31430.3	32651.7	35270.3	37095.3
IPI:IPI00014516.1	CALD1	Isoform 1 of Caldesmon	16	130	C	UR	52054.5	42586.6	45443.7	45910	25520.3	29985.3
IPI:IPI00218695.1	CALD1	Isoform 3 of Caldesmon	16	4	C	UR	1540.53	1295.15	1181.63	1239.27	1261.32	1379.25
IPI:IPI00014238.2	KARS	Lysyl-tRNA synthetase	16	225	C	UR	73742.1	59812.5	54445.1	56833.2	52845.3	40655.3
IPI:IPI00217391.6	LMTK2	Serine/threonine-protein kinase LMTK2	16	3	C	UR	1025.93	783.091	872.943	924.302	1037.54	870.423
IPI:IPI00257882.7	PEPD	Xaa-Pro dipeptidase	16	48	C	UR	15631.7	12239.6	12553.8	11493.2	10298.8	12236.6
##IPI:IPI00008115.3	MAP3K9	Isoform 1 of Mitogen-activated protein kinase kinase kinase 9	16	4	C	UR	313.016	375.23	411.719	299.16	515.027	500.374
IPI:IPI00003827.1	PISD	phosphatidylserine decarboxylase	16	9	C	UR	3294.11	2854.89	2898.93	2618.8	2759.44	2997.33
IPI:IPI00744692.1	TALDO1	Transaldolase	16	201	C	UR	77107.3	65692.6	64248.1	52630.1	68541.4	78567.1
IPI:IPI00029019.6	UBAP2L	Isoform 2 of Ubiquitin-associated protein 2-like	16	153	C	UR	27090.4	34897.4	31951.9	26612.1	29492.7	30282.1
IPI:IPI00514856.4	UBAP2L	Isoform 1 of Ubiquitin-associated protein 2-like	16	4	C	UR	1454.36	1488.49	1354.49	1229.49	1438.71	1548.59
IPI:IPI00005416.5	UBAP2L	NICE-4 protein (Fragment)	16	18	C	UR	6299.9	8524.96	7000.68	7209.07	7965.33	7997.48
IPI:IPI00013455.8	CLIP1	CLIP1 protein	16	117	C	UR	43888.3	34533.7	48506	45275.3	37580.3	41397.4
IPI:IPI00013933.2	DSP	Isoform DPI of Desmoplakin	16	533	C	UR	481720	276080	79748.3	74945.7	151933	154355
IPI:IPI00373894.6	KIAA0100	Isoform 1 of UPF0378 protein KIAA0100	16	7	C	UR	2124.28	1601.96	1933.05	2064.93	1938.04	1969.02
IPI:IPI00171134.5	CCDC88A	Isoform 1 of Girdin	16	60	C	UR	16071.4	23237.5	24008.6	19709.9	19778.1	21576.1
IPI:IPI00884966.1	CCDC88B	Isoform 4 of Coiled-coil domain-containing protein 88B	16	4	C	UR	369.405	293.652	369.111	500.379	533.64	377.068
IPI:IPI00029107.1	WRN	Werner syndrome ATP-dependent helicase	16	35	C	UR	8605.48	12609.8	12281	14994.4	14849.8	12559.8
IPI:IPI00740019.2	CCDC88C	Isoform 1 of Protein Daple	16	31	C	UR	4991.59	4077.23	5372.63	5510.01	6022.16	6471.08
IPI:IPI00019642.1	CLIP2	Isoform 1 of CAP-Gly domain-containing linker protein 2	16	35	C	UR	12940.8	10744.5	21316.2	17683.9	14225.2	14593.8
IPI:IPI00021250.3	DAPK1	Death-associated protein kinase 1	16	40	C	UR	8227.24	14723.2	24689.3	17826.3	8714.13	9965.45
IPI:IPI00064200.5	MAML2	mastermind-like 2	16	4	C	UR	983.791	726.182	714.432	558.457	625.622	747.749
IPI:IPI00016250.6	FXR2	Fragile X mental retardation syndrome-related protein 2	16	129	C	UR	22674.1	25229.1	29634.1	26924.6	31998.1	35323.8
IPI:IPI00797887.2	FXR1	cDNA FLJ58199, highly similar to Fragile X mental retardation syndrome-related protein 1	16	12	C	UR	2640.66	4076.99	4110.32	3605.49	3830.96	3217.04
IPI:IPI00554715.4	FXR1	Isoform 2 of Fragile X mental retardation syndrome-related protein 1	16	99	C	UR	17419.9	28881.1	27291.3	22791	23162.7	24657.9
IPI:IPI00169267.3	ATL2	Isoform 1 of Atlastin-2	16	35	C	UR	9677.26	9514.79	9499.48	7701.38	8028.41	9677.01
IPI:IPI00024279.4	HEATR1	HEAT repeat-containing protein 1	16	116	C	UR	40993.4	38314.1	40601.7	43544.1	47360.6	37252.7
IPI:IPI00410666.1	SCRIB	Isoform 3 of Protein LAP4	16	145	C	UR	28200.3	30833	41502.3	33647.2	31244.4	33132.7
IPI:IPI00425562.4	SCRIB	Isoform 2 of Protein LAP4	16	1	C	UR	60.1411	51.1118	71.4917	72.1174	58.362	60.8011
IPI:IPI00427739.1	LRRC1	Isoform 1 of Leucine-rich repeat-containing protein 1	16	15	C	UR	7336.4	6062.88	3130.77	3853.34	4993.04	4374.3
IPI:IPI00436705.7	MORC3	MORC family CW-type zinc finger protein 3	16	35	C	UR	11801.6	10940.2	10992.5	11101.8	13170.2	13559.4
IPI:IPI00005015.1	CNOT3	Isoform 1 of CCR4-NOT transcription complex subunit 3	16	58	C	UR	15148.9	18032.2	16505.3	20867.6	17409.6	17242.8
IPI:IPI00657797.3	SEPT1	Septin-1	16	36	C	UR	4796.48	4131.69	4645.89	17050.9	17982.9	4752.47
IPI:IPI00032387.1	GINS1	DNA replication complex GINS protein PSF1	16	32	C	UR	6675.62	7790.67	8509.47	9675.98	8680.1	8441.89
IPI:IPI00746183.2	UEVLD	Isoform 1 of Ubiquitin-conjugating enzyme E2 variant 3	16	12	C	UR	3289.07	3261	3556.79	2876.56	3237.96	3932.58
IPI:IPI00173946.7	TANC1	Isoform 1 of Protein TANC1	16	57	C	UR	18067.7	15238.4	14874.3	12168.2	13947.3	15856
IPI:IPI00853219.1	RAPGEF2	Rap guanine nucleotide exchange factor 2	16	23	C	UR	5766.04	6531.9	7744.84	7036.4	6815.55	7304.9
IPI:IPI00000816.1	YWHAE	14-3-3 protein epsilon	16	735	C	UR	166030	249074	203946	149744	207600	228533
IPI:IPI00021263.3	YWHAZ	14-3-3 protein zeta/delta	16	513	C	UR	145386	126906	106711	123420	116894	132532
IPI:IPI00216318.5	YWHAB	Isoform Long of 14-3-3 protein beta/alpha	16	191	C	UR	52392.6	44339.2	42600.2	56474.7	48013.8	51759.2
IPI:IPI00552142.1	CENPI	Isoform 1 of Centromere protein I	16	8	C	UR	3173.64	3901.21	4076.8	4038.32	4079.17	3905.87
IPI:IPI00022791.1	MFAP3	Microfibril-associated glycoprotein 3	16	4	C	UR	2299.4	1425.8	1565.87	1712.86	1982.25	3110.33
IPI:IPI00216319.3	YWHAH	14-3-3 protein eta	16	126	C	UR	41035.6	36536.3	31284.9	27499	34453.3	40129.5
IPI:IPI00220642.7	YWHAG	14-3-3 protein gamma	16	108	C	UR	19397.3	23421.4	26690.9	24184.1	25450.4	30454
IPI:IPI00029819.3	NOTCH3	Neurogenic locus notch homolog protein 3	16	24	C	UR	12868.2	8010.57	4894.52	3528.78	4295.83	5302.23
IPI:IPI00297655.4	NOTCH2	Neurogenic locus notch homolog protein 2	16	24	C	UR	4761.04	5644.74	6222.22	4561.64	4410.28	4928.52
IPI:IPI00397191.4	LOC650157	similar to peptidyl-Pro cis trans isomerase	16	2	C	UR	1105.75	868.663	360.16	483.98	404.156	511.296
IPI:IPI00026519.1	PPIF	Peptidyl-prolyl cis-trans isomerase, mitochondrial	16	91	C	UR	27721.5	26644.1	30009.4	24281	22139.6	26784.9
IPI:IPI00003927.5	PPID	40 kDa peptidyl-prolyl cis-trans isomerase	16	127	C	UR	33248.8	35228.8	45751.4	41221.7	39777.9	36094.3
IPI:IPI00015864.1	RNASEL	2-5A-dependent ribonuclease	16	27	C	UR	8071.89	7007.33	7455.98	7226.61	9816.75	11113.5
IPI:IPI00221325.3	RANBP2	E3 SUMO-protein ligase RanBP2	16	413	C	UR	133178	131446	132945	133797	125279	125516
IPI:IPI00395925.3	WWC3	Isoform 1 of Protein WWC3	16	10	C	UR	3636.45	2950.62	3158.3	2810.83	2883.76	3175.94
IPI:IPI00030144.1	PPIAL4G;PPIAL4A;PPIAL4B;PPIAL4C	Peptidylprolyl cis-trans isomerase A-like 4B	16	172	C	UR	51869.8	42135.9	29967	32445	32057.5	31218.6
IPI:IPI00419585.9	PPIA	Peptidyl-prolyl cis-trans isomerase A	16	255	C	UR	107177	91132.2	60782.8	74482.2	77178.1	64089.5
IPI:IPI00419919.5	RPL29;RPL29P4	60S ribosomal protein L29	16	28	C	UR	7092.75	6191.55	7623.61	6322.97	6706.74	5637.09
IPI:IPI00304596.3	NONO	Non-POU domain-containing octamer-binding protein	16	816	C	UR	138145	140303	147165	154249	155600	157309
IPI:IPI00784233.2	GIGYF2	Isoform 1 of PERQ amino acid-rich with GYF domain-containing protein 2	16	141	C	UR	26232.9	33166.5	29833.4	27401.2	26947.4	28257.1
IPI:IPI00010740.1	SFPQ	Isoform Long of Splicing factor, proline- and glutamine-rich	16	583	C	UR	91539.2	95283.7	97276.4	111022	111359	109066
IPI:IPI00103525.1	PSPC1	Isoform 1 of Paraspeckle component 1	16	157	C	UR	31538.9	31837.2	30782.5	33152.2	37912.1	42226.9
IPI:IPI00658000.2	IGF2BP3	Isoform 1 of Insulin-like growth factor 2 mRNA-binding protein 3	16	95	C	UR	21708.2	28777.2	29000.2	23675.5	18804.1	17433.7
IPI:IPI00008557.5	IGF2BP1	Insulin-like growth factor 2 mRNA-binding protein 1	16	149	C	UR	20215	74116.6	67895.1	52172.9	31213.3	36494.5
IPI:IPI00179713.6	IGF2BP2	Isoform 1 of Insulin-like growth factor 2 mRNA-binding protein 2	16	52	C	UR	10848.9	16718.5	15431.2	12813.8	12143.7	13363.3
IPI:IPI00011696.1	VAV1	Proto-oncogene vav	16	88	C	UR	14544.5	20808.3	27126.9	50911.7	50276.9	22971.9
IPI:IPI00219689.1	VAV3	Isoform Beta of Guanine nucleotide exchange factor VAV3	16	15	C	UR	3955.42	2969.98	2553.61	8386.69	8638.67	4903.71
IPI:IPI00029162.3	CDC2L5	Isoform 2 of Cell division cycle 2-like protein kinase 5	16	37	C	UR	12446.2	11952.3	11720	11038.3	13070.2	12136.8
IPI:IPI00515097.3	LCK	Isoform 3 of Proto-oncogene tyrosine-protein kinase LCK	16	74	C	UR	7282.21	7182.83	8467.14	36464.3	39845.6	9903.52
IPI:IPI00301923.4	CDK9	Isoform 1 of Cell division protein kinase 9	16	30	C	UR	4099.17	6628.45	6157.6	4764.59	5304.44	5546.5
IPI:IPI00023529.1	CDK6	Cell division protein kinase 6	16	76	C	UR	10049.8	8953.23	10236.7	50713.3	51796.1	11637.4
IPI:IPI00026689.4	CDC2	Putative uncharacterized protein DKFZp686L20222	16	167	C	UR	39943.1	48701	45177.7	43000.9	51467.3	45567.3
IPI:IPI00023530.7	CDK5	Cell division protein kinase 5	16	42	C	UR	12751.2	11048.8	9017.71	12817.4	13358.4	12627.6
IPI:IPI00031681.1	CDK2	Cell division protein kinase 2	16	47	C	UR	8131.61	10477.6	11904.5	14105.5	16645.7	15684.9
IPI:IPI00021175.1	CRKRS	Isoform 1 of Cell division cycle 2-related protein kinase 7	16	47	C	UR	13151.9	12006.1	14280.6	19246.8	18484.7	15510.1
IPI:IPI00016932.3	INPPL1	Isoform 1 of Phosphatidylinositol-3,4,5-trisphosphate 5-phosphatase 2	16	50	C	UR	16269.7	12823.2	12761.6	11488.6	18317.8	21255.9
IPI:IPI00005270.8	KDELC1	KDEL motif-containing protein 1	16	28	C	UR	8551.79	7493	8706.92	7948.61	12391.8	15139.1
IPI:IPI00329213.2	INPP5D	Isoform 1 of Phosphatidylinositol-3,4,5-trisphosphate 5-phosphatase 1	16	22	C	UR	3420.13	3325.23	3798.42	13874.4	14298	4903.24
IPI:IPI00017855.1	ACO2	Aconitate hydratase, mitochondrial	16	199	C	UR	47751.7	48124.7	52792.6	43935.9	57436.4	68098.2
IPI:IPI00011488.4	STK4	Isoform 1 of Serine/threonine-protein kinase 4	16	57	C	UR	14520.4	13938.4	13432.4	24744.6	20343.4	15342.2
IPI:IPI00878252.1	GTF3C2	Isoform 1 of General transcription factor 3C polypeptide 2	16	38	C	UR	11981.5	10902.7	11423.2	9773.82	10909.8	13317.1
IPI:IPI00856098.1	RRBP1	p180/ribosome receptor	16	282	C	UR	93661.5	79007.5	79572.4	62948.4	57131.3	59154.4
IPI:IPI00024417.1	HIP1R	Huntingtin-interacting protein 1-related protein	16	84	C	UR	27679.5	22089.8	20134.9	16836.5	24931.8	29482.4
IPI:IPI00171768.5	KIF18A	Kinesin-like protein KIF18A	16	17	C	UR	6743.54	6214.79	6848.06	6091.14	5740.02	6145.77
IPI:IPI00012645.1	SPTBN2	Isoform 1 of Spectrin beta chain, brain 2	16	133	C	UR	52486.3	44442.6	42353.6	27067.4	33473.4	36151.9
IPI:IPI00005614.6	SPTBN1	Isoform Long of Spectrin beta chain, brain 1	16	821	C	UR	190773	158850	193197	257717	227398	230216
IPI:IPI00333015.7	SPTBN1	Isoform 2 of Spectrin beta chain, brain 1	16	20	C	UR	1791.8	2106.39	1786.13	2646.39	2074.18	1411.87
IPI:IPI00256684.1	AP2A1	Isoform B of AP-2 complex subunit alpha-1	16	145	C	UR	42378.2	36019.2	37271.6	35173.2	34161.9	39682.4
IPI:IPI00914938.1	AP2A2	Isoform 1 of AP-2 complex subunit alpha-2	16	72	C	UR	15384.4	19024.4	20429.5	17526.5	17190.5	20186
IPI:IPI00760846.1	MYO18A	Isoform 1 of Myosin-XVIIIa	16	154	C	UR	64463	52255.5	30163.5	56349	55629.8	38967.9
IPI:IPI00006987.1	DDX24	ATP-dependent RNA helicase DDX24	16	136	C	UR	26264.1	27766.6	34623.7	52170.3	49652.4	29086.4
IPI:IPI00023283.3	TTN	Isoform 2 of Titin	16	18	C	UR	6530.02	5931.14	6160.9	5207.46	6137.92	6548.33
IPI:IPI00028275.2	CKAP5	Isoform 1 of Cytoskeleton-associated protein 5	16	443	C	UR	102013	111409	194876	156128	96822.6	106708
IPI:IPI00293331.3	POP1	Ribonucleases P/MRP protein subunit POP1	16	69	C	UR	13896.7	19909.7	20207.4	14798.3	15018.9	15646.3
IPI:IPI00010182.4	DBI	Isoform 1 of Acyl-CoA-binding protein	16	102	C	UR	41089.2	36364.9	26277.4	30731.3	22550.8	27988.4
IPI:IPI00006196.3	NUMA1	Isoform 2 of Nuclear mitotic apparatus protein 1	16	608	C	UR	138600	149474	156496	146469	147719	162805
IPI:IPI00292771.4	NUMA1	Isoform 1 of Nuclear mitotic apparatus protein 1	16	5	C	UR	1936.95	2013.74	2096.51	1390.75	1093.77	1248.84
IPI:IPI00797771.1	C20orf117	Isoform 2 of Uncharacterized protein C20orf117	16	33	C	UR	10582.4	11405.7	15272.7	10000.6	10339	11069.7
IPI:IPI00010951.2	EPPK1	epiplakin 1	16	151	C	UR	66820.1	63426.8	37372	35653.4	34026.8	39488.3
IPI:IPI00550575.2	NRBF2	Isoform 1 of Nuclear receptor-binding factor 2	16	9	C	UR	2467.98	2729.5	2756.82	2552.06	2412.53	2688.53
IPI:IPI00014898.3	PLEC1	Isoform 1 of Plectin-1	16	1161	C	UR	322432	273785	484963	418186	173671	214423
IPI:IPI00186711.4	PLEC1	Isoform 2 of Plectin-1	16	7	C	UR	885.982	666.606	879.441	653.756	680.112	720.151
IPI:IPI00398779.5	PLEC1	Isoform 4 of Plectin-1	16	2	C	UR	1488.39	1140.19	2018.47	1906.95	753.031	998.785
IPI:IPI00398154.2	AFAP1	Actin filament-associated protein 1	16	22	C	UR	4090.87	4042.84	8310.81	8096.31	6194.35	7847.82
IPI:IPI00083708.3	BAT2D1	Isoform 7 of BAT2 domain-containing protein 1	16	241	C	UR	62838.6	70093.4	67702.2	61584.3	57398.8	61203.5
IPI:IPI00148247.4	BAT2D1	Isoform 6 of BAT2 domain-containing protein 1	16	1	C	UR	338.964	426.927	330.061	247.759	251.293	248.225
IPI:IPI00464978.1	IRS2	Insulin receptor substrate 2 insertion mutant (Fragment)	16	25	C	UR	4783.1	6051.63	8937.81	8453.6	4500.61	4894.76
IPI:IPI00741537.3	BAT2L	HLA-B associated transcript 2-like	16	80	C	UR	17814.7	22337.4	22916.9	19762.4	18174.1	21386.3
IPI:IPI00873899.1	ABCF1	Isoform 1 of ATP-binding cassette sub-family F member 1	16	164	C	UR	63566.8	52320	46797	47152.1	46626.3	48097.5
IPI:IPI00021417.3	SART1	U4/U6.U5 tri-snRNP-associated protein 1	16	159	C	UR	38843.6	35072.1	37830.2	46109.6	39394.6	37132.7
IPI:IPI00006025.1	SART3	Isoform 1 of Squamous cell carcinoma antigen recognized by T-cells 3	16	164	C	UR	41770.4	59229.4	55222.2	56060	53421.9	52575.9
IPI:IPI00021347.1	UBE2L3	Ubiquitin-conjugating enzyme E2 L3	16	64	C	UR	22351.6	19819.1	20627.5	22380	18943.8	19736.1
IPI:IPI00064716.1	FAM92A1	Isoform 3 of Protein FAM92A1	16	2	C	UR	519.562	908.667	980.976	648.981	711.655	703.019
IPI:IPI00008438.1	RPS10	40S ribosomal protein S10	16	287	C	UR	65933.7	59934.7	65117.8	67789.1	60349.1	60237.6
IPI:IPI00004671.2	GOLGB1	Golgin subfamily B member 1	16	230	C	UR	97081.8	69299.8	66144.6	61165.7	66752.3	71757.6
IPI:IPI00010700.2	BAT2	Isoform 1 of Large proline-rich protein BAT2	16	263	C	UR	58610	60704.1	59908.1	60154	56396.6	61529.3
IPI:IPI00333197.4	GCC2	Isoform 2 of GRIP and coiled-coil domain-containing protein 2	16	84	C	UR	30431.7	28997.4	31972.6	27905.4	31255.8	31734.1
IPI:IPI00550986.4	C12orf11	Uncharacterized protein C12orf11	16	37	C	UR	7301.75	9031.76	8522.46	7594.24	8147.36	8058.42
IPI:IPI00003921.2	EPB41	Isoform 1 of Protein 4.1	16	162	C	UR	24175.7	65112.3	59636.1	43063.9	31979.1	34895
IPI:IPI00218697.2	EPB41	Isoform 2 of Protein 4.1	16	2	C	UR	418.413	1074.22	951.768	674.249	495.592	505.38
IPI:IPI00300371.5	SF3B3	Isoform 1 of Splicing factor 3B subunit 3	16	339	C	UR	70966.6	71021.7	73982.9	77332.5	73810.3	75105.5
IPI:IPI00410656.1	ZC3H6	Zinc finger CCCH domain-containing protein 6	16	9	C	UR	1224.47	1693.55	1577.39	1295.19	1612.87	1567.2
IPI:IPI00297931.4	AP1GBP1	Isoform 1 of AP1 subunit gamma-binding protein 1	16	36	C	UR	14563.4	11501.6	11964.2	17137.4	14141.2	12393.3
IPI:IPI00798416.3	AP1GBP1	Isoform 3 of AP1 subunit gamma-binding protein 1	16	1	C	UR	298.698	324.682	272.012	349.309	257.384	326.28
IPI:IPI00923606.1	EPRS	glutamyl-prolyl tRNA synthetase	16	506	C	UR	184903	147948	131891	106528	126100	141739
IPI:IPI00394856.7	KIF7	Kinesin-like protein KIF7	16	22	C	UR	5362.86	4976.09	5124.57	5339.65	5560.45	4894.26
IPI:IPI00218200.8	BCAP31	B-cell receptor-associated protein 31	16	61	C	UR	37215.8	32435.5	28170.2	21738.2	18430.1	16169
IPI:IPI00397809.4	KIF21B	Kinesin-like protein KIF21B variant	16	7	C	UR	1678.29	1488.79	1281.14	2110.72	2152.4	2318.16
IPI:IPI00465105.4	DNAJA4	DnaJ (Hsp40) homolog, subfamily A, member 4 isoform 1	16	3	C	UR	532.629	574.102	1399.49	1268.44	405.461	520.003
IPI:IPI00015793.7	SMG6	Isoform 1 of Telomerase-binding protein EST1A	16	43	C	UR	8827.61	12325.8	12888.9	12916	13212.9	11444.7
IPI:IPI00550733.6	TBC1D2B	Isoform 1 of TBC1 domain family member 2B	16	17	C	UR	4752.54	4968.89	5715.47	5574.63	5995.84	6313.71
IPI:IPI00411984.5	STK3	cDNA FLJ16404 fis, clone UTERU2008019, highly similar to Serine/threonine-protein kinase 3	16	23	C	UR	8699.12	6975.77	6802.19	5889.71	7500.88	7980.4
IPI:IPI00782965.2	HIP1	Huntingtin-interacting protein 1	16	55	C	UR	16389.2	15910.4	16800.4	14661.9	28953	34962.3
IPI:IPI00002459.4	ANXA6	annexin VI isoform 2	16	305	C	UR	49885.9	113247	119550	100374	110261	49328.9
IPI:IPI00221226.7	ANXA6	Annexin A6	16	6	C	UR	538.847	1209.04	1253.2	1238.86	1261.49	447.449
IPI:IPI00026665.2	QARS	cDNA FLJ75085, highly similar to Homo sapiens glutaminyl-tRNA synthetase (QARS), mRNA	16	194	C	UR	63103.7	51251.8	43833.9	42806.6	46468.2	53396.8
IPI:IPI00106567.2	WDR33	WD repeat-containing protein 33	16	85	C	UR	18564.4	19781.8	20110.9	22352.3	22824.8	24103.5
IPI:IPI00550069.3	RNH1	Ribonuclease inhibitor	16	164	C	UR	36047.9	36032.4	38974.6	35511.5	25076.9	27866.3
IPI:IPI00179016.8	SETD1A	Histone-lysine N-methyltransferase SETD1A	16	22	C	UR	5255.7	5317.11	6023.41	6896.43	6776.3	6172.82
IPI:IPI00003406.4	DBN1	Isoform 1 of Drebrin	16	253	C	UR	39169.6	57463.1	49794.6	38578.4	51870.7	53533.5
IPI:IPI00001159.1	GCN1L1	Translational activator GCN1	16	361	C	UR	97271.6	86056.5	102021	92753.2	90946.4	106823
IPI:IPI00019502.3	MYH9	Isoform 1 of Myosin-9	16	1675	C	UR	536035	444594	422013	426762	415892	345867
IPI:IPI00397526.3	MYH10	Isoform 1 of Myosin-10	16	523	C	UR	105608	154094	154609	134755	153206	172282
IPI:IPI00479307.4	MYH10	Isoform 2 of Myosin-10	16	2	C	UR	710.061	531.078	552.594	645.26	1532.56	1593.37
IPI:IPI00607818.3	MYH14	myosin, heavy chain 14 isoform 1	16	170	C	UR	59200.8	52204.7	22529.2	20288	55702.9	64180.6
IPI:IPI00856045.1	AHNAK2	Isoform 1 of Protein AHNAK2	16	8	C	UR	5440.44	4191.04	2064.08	2021.87	2805.74	3214.17
IPI:IPI00021812.2	AHNAK	Neuroblast differentiation-associated protein AHNAK	16	1485	C	UR	851136	573390	510459	419767	197471	235810
IPI:IPI00020501.1	MYH11	Myosin-11	16	35	C	UR	16923.7	14452.2	13388.6	11841.1	11460.7	12924.1
##IPI:IPI00019502.3	MYH9	Isoform 1 of Myosin-9	16	6	C	UR	2706.8	1516.01	1954.08	1443.02	1365.36	2666.79
IPI:IPI00855998.1	CENPF	Centromere protein F	16	243	C	UR	68030.3	95448.6	67347.8	60948.7	96892.4	130775
IPI:IPI00011692.2	IVL	Involucrin	16	13	C	UR	5952	5571.6	2509	2572.78	2954.79	3148.51
IPI:IPI00002966.2	HSPA4	Heat shock 70 kDa protein 4	16	592	C	UR	166240	148617	169799	151515	127344	138294
IPI:IPI00002135.1	TACC3	Transforming acidic coiled-coil-containing protein 3	16	97	C	UR	18546.1	20828	22096.9	24203.6	21372.1	29163.2
IPI:IPI00295485.1	HSPA4L	Heat shock 70 kDa protein 4L	16	121	C	UR	22577.9	35928.8	31488.9	28013.1	58518.8	63768.2
IPI:IPI00874277.1	MAP7	Putative uncharacterized protein MAP7	16	3	C	UR	3071.34	2041.56	589.461	465.264	1073.15	970.978
IPI:IPI00654605.1	MAP7D1	Isoform 1 of MAP7 domain-containing protein 1	16	71	C	UR	13144.6	14385.3	15843.7	14392.9	11018.8	12109.4
IPI:IPI00218993.1	HSPH1	Isoform Beta of Heat shock protein 105 kDa	16	363	C	UR	90912.9	86064.3	141908	114260	97088.8	66721
IPI:IPI00514983.4	HSPH1	Heat shock 105kDa/110kDa protein 1, isoform CRA_b	16	83	C	UR	8367.75	7690.77	14767.4	11714.8	6348.47	4167.74
IPI:IPI00013508.5	ACTN1	Alpha-actinin-1	16	529	C	UR	186777	153831	116099	108446	95641.4	115476
IPI:IPI00013808.1	ACTN4	Alpha-actinin-4	16	588	C	UR	250277	199670	123595	116453	122627	144651
IPI:IPI00009286.4	MLL	Isoform 1 of Histone-lysine N-methyltransferase HRX	16	126	C	UR	29321.8	33831.2	34488.9	29728.2	32784.4	37158.1
IPI:IPI00218823.4	MLL4	Isoform 1 of Histone-lysine N-methyltransferase MLL4	16	13	C	UR	2495.65	2237.61	2630.45	2469.52	2862.61	2435.63
IPI:IPI00163085.2	AMOT	Isoform 1 of Angiomotin	16	24	C	UR	5444.04	7685.92	6282.58	4828.51	5924.98	7757.1
IPI:IPI00221067.1	PTPRA	Isoform 2 of Receptor-type tyrosine-protein phosphatase alpha	16	19	C	UR	4236.43	3348.71	3860.43	3878.26	3835.85	4436.6
IPI:IPI00011644.4	PTPRE	Receptor-type tyrosine-protein phosphatase epsilon precursor	16	3	C	UR	1045.2	692.838	859.604	1368.81	1347.48	936.41
IPI:IPI00008570.1	KHDRBS3	Isoform 1 of KH domain-containing, RNA-binding, signal transduction-associated protein 3	16	58	C	UR	15808	25383.8	24773.3	17181	19104.6	21632.9
IPI:IPI00063667.3	BOD1	Isoform 1 of Protein FAM44B	16	14	C	UR	4303.54	4366.72	3915.83	3603.74	3973.82	3651.69
IPI:IPI00553043.2	LIMCH1	Isoform 1 of LIM and calponin homology domains-containing protein 1	16	25	C	UR	11162.9	9085.31	6770.68	5036.26	9818.59	11152.4
IPI:IPI00797574.3	BOD1L	Protein FAM44A	16	99	C	UR	22005.3	20467.9	26251.8	36789.5	28759	26541.6
IPI:IPI00008575.3	KHDRBS1	Isoform 1 of KH domain-containing, RNA-binding, signal transduction-associated protein 1	16	198	C	UR	28994.5	28864.2	28992.6	33100.5	36130.6	40745.9
IPI:IPI00165138.1	GCC1	GRIP and coiled-coil domain-containing protein 1	16	24	C	UR	11353.6	9074.41	9657.38	9842.08	9971.87	9378.34
IPI:IPI00306518.3	FANCI	Isoform 3 of Fanconi anemia group I protein	16	110	C	UR	18393.1	23276.1	24508.4	36456.9	37381.4	40326.5
IPI:IPI00869107.1	NUDT19	Nucleoside diphosphate-linked moiety X motif 19, mitochondrial	16	24	C	UR	5192.67	4543.74	4719.78	3476.25	3944.46	4607.8
IPI:IPI00157365.2	NUB1	NEDD8 ultimate buster 1 (Negative regulator of ubiquitin-like proteins 1) (Renal carcinoma antigen NY-REN-18). Isoform 2	16	37	C	UR	8640.13	7268.65	6301.3	14319.3	13203.8	8997.96
IPI:IPI00007811.1	CDK4	Cell division protein kinase 4	16	31	C	UR	7224.19	9019.8	8690.45	6091.39	9273.48	10176.4
IPI:IPI00022628.5	MAP7	cDNA FLJ50558, highly similar to Homo sapiens microtubule-associated protein 7 (MAP7), mRNA	16	35	C	UR	19471.8	14436.9	8451.44	7921.24	9893.79	10198.6
IPI:IPI00470582.2	C10orf118	Isoform 1 of Uncharacterized protein C10orf118	16	14	C	UR	5712.95	3896.6	3755.98	3994.42	4164.27	4293.31
IPI:IPI00030131.3	TMPO	Isoform Beta of Lamina-associated polypeptide 2, isoforms beta/gamma	16	230	C	UR	28797.6	42733.6	42976.4	51335.9	48957.3	44689.4
IPI:IPI00791301.1	TMPO	46 kDa protein	16	1	C	UR	71.9007	85.3841	82.5117	77.4842	94.6431	73.8699
IPI:IPI00216230.3	TMPO	Lamina-associated polypeptide 2, isoform alpha	16	167	C	UR	20657.8	44989.5	39422.5	44198.2	39333.3	31326.4
IPI:IPI00100460.2	DARS2	Aspartyl-tRNA synthetase, mitochondrial	16	82	C	UR	22366.5	21202.1	21607.5	15729.3	24481.4	28772.1
IPI:IPI00010796.1	P4HB	Protein disulfide-isomerase	16	442	C	UR	121606	118955	144639	97993.4	102968	118085
IPI:IPI00171438.2	TXNDC5;MUTED	Thioredoxin domain-containing protein 5	16	141	C	UR	57558.2	47574.4	36117	27960.4	39003.3	48497.7
##IPI:IPI00023283.3	TTN	Isoform 2 of Titin	16	7	C	UR	3491.67	2344.84	2980.86	2624.43	3366.48	5597.02
IPI:IPI00009804.1	SATB1	DNA-binding protein SATB1	16	44	C	UR	8712.1	8144.3	9697.8	35053.8	27573.1	12634.4
IPI:IPI00162330.3	MRPL37	39S ribosomal protein L37, mitochondrial	16	73	C	UR	18831.3	18536.1	20213.3	18217.4	15270.7	17284.5
IPI:IPI00037599.3	TFCP2	Isoform 1 of Alpha-globin transcription factor CP2	16	14	C	UR	3494.83	3273.5	3027.91	3049.42	2912.47	2753.89
IPI:IPI00012585.1	HEXB	Beta-hexosaminidase subunit beta	16	73	C	UR	20921.4	17238.2	18282.2	15051.6	30285.9	38529.9
IPI:IPI00477231.3	MGEA5	Bifunctional protein NCOAT	16	70	C	UR	20573.7	24619.6	24637.3	21330.5	19599.3	20200.8
IPI:IPI00470913.3	RGPD1	Isoform 1 of RANBP2-like and GRIP domain-containing protein 1	16	8	C	UR	1756.16	1379.29	1495.9	2130.62	2025.49	1430.81
IPI:IPI00425404.2	KIF21A	Isoform 1 of Kinesin-like protein KIF21A	16	19	C	UR	5613.39	4089.41	3685.75	3163.24	9070.97	9571.18
IPI:IPI00024062.2	EPB41L1	Isoform 1 of Band 4.1-like protein 1	16	39	C	UR	28474.9	21919.6	8130.98	7306.81	9066.05	10724
IPI:IPI00645410.2	EPB41L1	Isoform 2 of Band 4.1-like protein 1	16	5	C	UR	5874.17	4054.28	745.503	691.911	1043.02	1140.17
IPI:IPI00015973.1	EPB41L2	Band 4.1-like protein 2	16	306	C	UR	49367.2	122876	93423.6	71174.2	67814.2	73941
IPI:IPI00747462.2	EPB41L2	cDNA FLJ54004, moderately similar to Band 4.1-like protein 2	16	2	C	UR	259.041	1186.9	643.284	787.449	670.573	587.733
IPI:IPI00148057.2	BRD8	Isoform 2 of Bromodomain-containing protein 8	16	26	C	UR	5538.74	7083.29	6987.28	8264.64	7003.9	6698.5
IPI:IPI00735681.3	KIF18B	Isoform 2 of Kinesin-like protein KIF18B	16	21	C	UR	2568.23	3343.6	3601.56	3922.15	4437.57	5704.87
IPI:IPI00305152.6	SEC31A	Isoform 3 of Protein transport protein Sec31A	16	119	C	UR	34232.5	29951.3	31567.3	34100	33434.8	30033.8
IPI:IPI00013981.4	YES1	Proto-oncogene tyrosine-protein kinase Yes	16	71	C	UR	27227.3	19561.9	21756.8	18584.6	16241.1	15274.6
IPI:IPI00640091.3	FYN	Isoform 2 of Proto-oncogene tyrosine-protein kinase Fyn	16	15	C	UR	1626.72	1654.16	1667.98	4666.72	4257.98	2080.38
IPI:IPI00007334.1	ACIN1	Isoform 1 of Apoptotic chromatin condensation inducer in the nucleus	16	233	C	UR	42689.7	58594.2	54406.4	59543.7	55668.2	57815.6
IPI:IPI00010800.2	NES	Nestin	16	75	C	UR	13110.4	11779.5	46213.4	32519.8	28753.1	31234.1
IPI:IPI00073096.3	TRIM29	Isoform Alpha of Tripartite motif-containing protein 29	16	78	C	UR	70252.6	60206.7	11497.8	11945.9	13301.3	14320.5
IPI:IPI00911038.1	-	cDNA FLJ50838, highly similar to Apoptotic chromatin condensation inducer in thenucleus (Fragment)	16	6	C	UR	2880.5	3200.81	3848.12	4874.24	4697.53	4674.61
IPI:IPI00000807.1	MYO5A	Isoform 1 of Myosin-Va	16	31	C	UR	11815.7	8857.92	8948.57	9657.21	14984.9	16586.5
IPI:IPI00016007.1	MYO5C	Myosin-Vc	16	4	C	UR	1940.65	1430.07	786.308	931.334	1555.73	1903.96
IPI:IPI00479962.4	MYO5B	Myosin-Vb	16	11	C	UR	6213.45	4937.84	2032.37	1649.61	5083.09	5576.29
IPI:IPI00215716.1	EPB41L3	Isoform B of Band 4.1-like protein 3	16	18	C	UR	3269.03	3503.42	2771.97	2357.44	14309.9	15753.6
IPI:IPI00217493.5	MB	Myoglobin	16	7	C	UR	6915.96	6562.7	3018.4	1767.83	2431.73	2614.96
IPI:IPI00412982.3	NOTCH1	Putative uncharacterized protein NOTCH1	16	22	C	UR	4876.18	5070.37	5762.36	8581.89	9725.67	6619.28
IPI:IPI00100787.2	RGPD4;RGPD7;RGPD6;RGPD5	RANBP2-like and GRIP domain-containing protein 7	16	56	C	UR	15234.4	14653.8	15651.5	14650.9	14382.4	15663.7
IPI:IPI00006608.1	APP	Isoform APP770 of Amyloid beta A4 protein (Fragment)	16	37	C	UR	21052.1	12780.5	14052.8	11414.7	11350.2	11879.4
IPI:IPI00021048.1	MYOF	Isoform 1 of Myoferlin	16	217	C	UR	167194	136369	41686.1	51037.8	32805.7	37547.6
IPI:IPI00847637.1	MAP7D3	Isoform 1 of MAP7 domain-containing protein 3	16	31	C	UR	12505.2	10149.3	11888.1	16120.2	13154	8397.67
IPI:IPI00018146.1	YWHAQ	14-3-3 protein theta	16	304	C	UR	88276.6	75443.8	63146.4	80221.4	74307.1	82326.2
IPI:IPI00290416.3	OLA1	Isoform 1 of Obg-like ATPase 1	16	132	C	UR	46775.2	40916	40008.3	40677.4	42431.9	40732.3
IPI:IPI00465132.4	COPE	Coatomer subunit epsilon	16	69	C	UR	16091.3	14037.6	15228.3	14234	11949.5	13835.3
IPI:IPI00007346.1	PPIH	Peptidyl-prolyl cis-trans isomerase H	16	123	C	UR	30460.2	30455.3	29386.5	30298.4	30354.1	27506.4
IPI:IPI00013107.3	SFRS16	Isoform 1 of Splicing factor, arginine/serine-rich 16	16	28	C	UR	4435.05	4958.75	5259.19	5400.58	5221.84	4613.03
IPI:IPI00478789.3	PHLDB1	Isoform 2 of Pleckstrin homology-like domain family B member 1	16	45	C	UR	9175.98	12840	13553.9	10849.9	11766.7	13227.7
IPI:IPI00217357.2	CCAR1	Cell division cycle and apoptosis regulator protein 1	16	125	C	UR	33058.1	32360.8	31801.2	36625.5	35741.8	36209.1
IPI:IPI00168459.5	PHLDB2	Isoform 2 of Pleckstrin homology-like domain family B member 2	16	9	C	UR	2286.89	1879.01	1470.09	1484.16	1490.62	1680.21
IPI:IPI00794798.2	KIAA1602	Isoform 3 of Uncharacterized protein KIAA1602	16	3	C	UR	1197.23	1159.35	1203.55	1078.98	944.687	1033.73
IPI:IPI00337800.3	DAAM1	Isoform 1 of Disheveled-associated activator of morphogenesis 1	16	9	C	UR	2585.61	1747.56	1058.85	1414.28	1736.81	1857.54
IPI:IPI00219800.1	MAP4K4	Isoform 3 of Mitogen-activated protein kinase kinase kinase kinase 4	16	85	C	UR	9357.24	17540.9	16717	17041.3	20013.8	14034.7
IPI:IPI00009315.6	ACBD3	Golgi resident protein GCP60	16	83	C	UR	23498.5	21384.5	18329	16792	19454.1	21835.9
IPI:IPI00844172.1	MYO6	Myosin	16	99	C	UR	64109.9	48584	14681.8	12904.4	46006.8	52057
IPI:IPI00295542.5	NUCB1	Nucleobindin-1	16	69	C	UR	24970	23769.1	26318.5	18898.3	20667	23366.9
IPI:IPI00060474.1	LRRC45	Leucine-rich repeat-containing protein 45	16	7	C	UR	1355.38	1243.52	1292.05	1219.59	1526.45	1314.64
IPI:IPI00413365.3	ZNF318	Isoform 1 of Zinc finger protein 318	16	35	C	UR	7682.65	7058.19	6684.84	6194.31	7643.15	8185.19
IPI:IPI00028055.4	TMED10	Transmembrane emp24 domain-containing protein 10	16	153	C	UR	31075.9	27907.1	31178.6	26703.4	30251.2	36418
IPI:IPI00376344.3	MYO1B	Isoform 1 of Myosin-Ib	16	136	C	UR	44054.8	35669.4	32145.2	36030.6	53914.7	57477.7
IPI:IPI00420004.3	MYO1G	Isoform 1 of Myosin-Ig	16	56	C	UR	9556.63	8474.38	9690.71	24668.4	25325.2	10627.3
IPI:IPI00329719.1	MYO1D	Isoform 1 of Myosin-Id	16	57	C	UR	27287.5	22583.6	11988.4	13295.2	23620.7	26246.7
IPI:IPI00008829.1	POLE2	DNA polymerase epsilon subunit 2	16	22	C	UR	6894.5	7764.59	9746.94	10122.6	9709.17	9016.69
IPI:IPI00031410.1	MTOR	FKBP12-rapamycin complex-associated protein	16	109	C	UR	30629.3	33641.5	33224	28542.5	29249	34043.6
IPI:IPI00003843.2	TJP2	cDNA FLJ53324, highly similar to Tight junction protein ZO-2	16	121	C	UR	51054.1	36721.1	22424.7	21611.7	49581	56218.7
IPI:IPI00216219.3	TJP1	Isoform Long of Tight junction protein ZO-1	16	95	C	UR	34762.5	28620.3	26107.8	21290.5	36554.5	39456.9
IPI:IPI00795990.1	TJP1	Putative uncharacterized protein DKFZp686A1195	16	1	C	UR	287.803	291.967	287.042	242.834	271.635	257.437
IPI:IPI00291668.6	TJP2	Tight junction protein 2	16	2	C	UR	451.139	366.053	360.291	356.045	948.077	1121.16
IPI:IPI00926491.1	PTCD1	cDNA FLJ56092, highly similar to Pentatricopeptide repeat protein 1	16	36	C	UR	9512.31	8925.58	10699.9	8770.12	8524.52	10314.1
IPI:IPI00329692.3	NMT1	Isoform Long of Glycylpeptide N-tetradecanoyltransferase 1	16	81	C	UR	19202.5	23593.8	22501.2	24064.7	21486.1	21300.2
IPI:IPI00219365.3	MSN	Moesin	16	691	C	UR	120153	150822	186891	196580	155838	117257
IPI:IPI00784883.4	MSL1	Isoform 1 of Male-specific lethal 1 homolog	16	18	C	UR	3343.87	3633.65	3504.8	4963.42	4890.4	4760.38
IPI:IPI00178072.7	CYTSA	Cytospin-A	16	41	C	UR	15832.2	14543.3	12470	10945.8	11165.3	13488
IPI:IPI00183294.4	NUP214	Isoform 1 of Nuclear pore complex protein Nup214	16	172	C	UR	47336.4	53917.1	57591.2	55992.2	50828.6	46266
IPI:IPI00900325.1	NUP214	Isoform 3 of Nuclear pore complex protein Nup214	16	1	C	UR	519.336	431.916	527.013	472.114	480.312	645.222
IPI:IPI00179953.2	NASP	Isoform 1 of Nuclear autoantigenic sperm protein	16	437	C	UR	68151.1	110083	91154.5	89938.6	111229	103806
IPI:IPI00176706.1	RBM17	Splicing factor 45	16	80	C	UR	20306.5	21100.4	21426.4	24174.2	21966.7	23199.1
IPI:IPI00396534.6	ITSN2	intersectin 2 isoform 3	16	7	C	UR	1979.05	1648.45	1627.11	2178.76	2105.63	2148.44
IPI:IPI00784201.1	CEP290	Isoform 1 of Centrosomal protein of 290 kDa	16	5	C	UR	618.265	787.705	990.217	790.623	783.313	921.433
IPI:IPI00607554.1	USP47	Isoform 1 of Ubiquitin carboxyl-terminal hydrolase 47	16	105	C	UR	24500.6	26888	28105.7	29257.2	30314	30980.6
IPI:IPI00412499.1	RABEP2	Isoform 1 of Rab GTPase-binding effector protein 2	16	25	C	UR	6422.29	5424.28	4638.89	5154.76	4914.12	5329.17
IPI:IPI00903145.1	RDX	Radixin	16	183	C	UR	36034.7	76242.1	90925	66693	27475.9	34719.2
IPI:IPI00022629.6	PRC1	Isoform 1 of Protein regulator of cytokinesis 1	16	47	C	UR	12000.2	18009.3	16671.6	14453.3	17071.3	27195.7
IPI:IPI00296365.4	CENPE	Isoform 1 of Centromere-associated protein E	16	59	C	UR	17031.4	19293.2	19945	19123.2	21753.3	21776.9
IPI:IPI00006252.3	AIMP1	Multisynthetase complex auxiliary component p43	16	98	C	UR	31832.1	26233.9	23943.5	21184.4	20022.1	22025.9
IPI:IPI00030404.2	NFX1	NFX.1	16	9	C	UR	2011.56	1800.88	2071.47	1979.6	2025.67	2273.55
IPI:IPI00456492.2	CROCC	Isoform 1 of Rootletin	16	37	C	UR	7829.74	10261.7	10034.1	8531.85	8683.53	9921.45
IPI:IPI00160622.1	CEP250	Isoform 1 of Centrosome-associated protein CEP250	16	28	C	UR	5322.67	5556.83	5814.02	7134.61	7686.07	6440.99
IPI:IPI00843975.1	EZR	Ezrin	16	216	C	UR	67079.2	54734.8	48933.5	61310.5	47761.3	45506
IPI:IPI00216423.1	ITSN2	Isoform 4 of Intersectin-2	16	42	C	UR	16056.6	12824.7	12516.2	11778.6	12122.5	12888.3
IPI:IPI00030223.3	NMT2	Glycylpeptide N-tetradecanoyltransferase 2	16	35	C	UR	5718.52	6425.77	7042.42	7093.91	8290.3	9574.83
IPI:IPI00384282.1	EZR	Cytovillin 2 (Fragment)	16	8	C	UR	1479.74	1072.51	1268.25	1335.61	1133.27	1069.44
IPI:IPI00452246.1	KIF16B	Isoform 1 of Kinesin-like protein KIF16B	16	4	C	UR	760.789	572.847	469.505	314.252	568.182	646.451
IPI:IPI00178150.5	KIF4A	Isoform 1 of Chromosome-associated kinesin KIF4A	16	141	C	UR	38058.8	39654.1	38412	38801.7	41586.9	44280.2
IPI:IPI00023727.1	KIF3C	Kinesin-like protein KIF3C	16	5	C	UR	1016.57	913.301	1499.99	801.691	1090.34	1204.92
IPI:IPI00151119.1	KIFC3	cDNA FLJ56036, highly similar to Homo sapiens kinesin family member C3 (KIFC3), mRNA	16	28	C	UR	8767.05	7852.92	9786.62	8549.95	4407.49	5044.76
IPI:IPI00004533.1	KIF3B	Kinesin-like protein KIF3B	16	29	C	UR	12851.3	11752.7	12144.5	9935.06	12318.7	15562.8
IPI:IPI00000455.7	KIF3A	Kinesin-like protein KIF3A	16	44	C	UR	10672	9996.75	9965.71	11575.5	12919.7	11631.2
IPI:IPI00220592.3	ITSN1	Isoform 2 of Intersectin-1	16	42	C	UR	13617.5	13556.6	12620.4	10354.6	10900.8	12220.8
IPI:IPI00607859.1	C4orf8	Isoform 2 of Uncharacterized protein C4orf8	16	13	C	UR	1557.04	1532.56	2299.77	2213.01	2145.19	2132.73
IPI:IPI00640598.1	ZMYND8	zinc finger, MYND-type containing 8 isoform a	16	56	C	UR	15736.3	16842.6	16030.2	10384.8	14759.1	17008.3
IPI:IPI00741204.2	ZMYND8	cDNA FLJ56888, highly similar to Protein kinase C-binding protein 1	16	2	C	UR	818.483	704.699	696.177	557.776	549.391	617.211
IPI:IPI00913988.1	MED12	Isoform 2 of Mediator of RNA polymerase II transcription subunit 12	16	43	C	UR	9807.24	9655.56	9628.29	9954.48	10200.2	10302.2
IPI:IPI00171494.6	DYNC2H1	Isoform 2 of Cytoplasmic dynein 2 heavy chain 1	16	22	C	UR	4412.83	7226.14	7482.34	5967.16	5201.75	6774.3
IPI:IPI00293564.5	HMGCL	Hydroxymethylglutaryl-CoA lyase, mitochondrial	16	33	C	UR	14685	14560.4	16057.9	9122.58	12924.6	15747.4
IPI:IPI00152510.4	DDX54	DEAD (Asp-Glu-Ala-Asp) box polypeptide 54 isoform 1	16	89	C	UR	23515	28451.6	33539.3	27240.1	30236.3	25998.2
IPI:IPI00879999.1	DDX54	ATP-dependent RNA helicase DDX54	16	1	C	UR	11.2277	11.6957	13.2936	16.2829	12.4141	4.62683
IPI:IPI00032423.2	DDX52	Probable ATP-dependent RNA helicase DDX52	16	34	C	UR	9126.4	8394	9493.3	13068.8	13379.1	10180.7
IPI:IPI00829992.2	MYO1C	Isoform 3 of Myosin-Ic	16	83	C	UR	22598.7	28710.1	26918.9	22296.7	18081.1	21661.3
IPI:IPI00791026.1	MYO1C	56 kDa protein	16	65	C	UR	19655.6	22029.6	19588.9	16340.9	13792.9	16579.7
IPI:IPI00010433.3	SATB2	DNA-binding protein SATB2	16	1	C	UR	0	5.08178	36.1359	23.9753	5.19238	7.96221
IPI:IPI00872771.2	RAPGEF6	Similar to PDZ domain-containing guanine nucleotide exchange factor I	16	35	C	UR	8534.52	9484.56	9852.74	9530.11	9201.43	9421.05
IPI:IPI00101532.5	CEP55	Isoform 1 of Centrosomal protein of 55 kDa	16	37	C	UR	8639.75	9195.08	10528.6	9740.36	10999.9	10570.4
IPI:IPI00651638.1	AMOTL1	Isoform 2 of Angiomotin-like protein 1	16	23	C	UR	4134.74	4437.32	5683.81	6446.04	5239.12	5936.77
IPI:IPI00031632.1	C7orf26	Isoform 2 of Uncharacterized protein C7orf26	16	2	C	UR	787.508	852.586	1100.34	894.13	1520.08	1159.01
IPI:IPI00163550.2	MORC4	MORC family CW-type zinc finger protein 4	16	5	C	UR	3362.91	2893.92	2925.84	2565.64	3859.23	4455.84
IPI:IPI00026555.1	TRMU	Isoform 1 of Mitochondrial tRNA-specific 2-thiouridylase 1	16	18	C	UR	5775.54	4884.98	4970.45	4968.08	4786.55	4262.78
IPI:IPI00064193.3	TMX3	Isoform 1 of Protein disulfide-isomerase TMX3	16	53	C	UR	11210.6	12057.5	14465.9	13421.6	14919.2	18129.5
IPI:IPI00291723.3	FAM116A	Protein FAM116A	16	14	C	UR	5274.26	5187.44	5443.31	5171.51	5989.52	6980.78
IPI:IPI00003818.1	KYNU	Kynureninase	16	44	C	UR	42404.9	27546.7	5013.73	5313.6	7498.85	8330.19
IPI:IPI00298625.2	LYN	Isoform LYN A of Tyrosine-protein kinase Lyn	16	20	C	UR	5522.44	5706.55	7787.54	6894.42	6250.37	7891.98
IPI:IPI00794105.1	CDCA2	113 kDa protein	16	60	C	UR	11345.8	15472.7	12195.7	18219.9	16192.4	18336.2
IPI:IPI00646304.4	PPIB	Peptidyl-prolyl cis-trans isomerase B	16	158	C	UR	52656.4	43960.9	55630.1	47393.5	44411.1	53861.8
IPI:IPI00789041.2	PNN	Isoform 1 of Pinin	16	186	C	UR	46100.1	39829.5	44691.7	55258.3	53478.9	49987.5
IPI:IPI00027851.2	HEXA	cDNA FLJ53927, highly similar to Beta-hexosaminidase alpha chain	16	21	C	UR	7594.13	6410.18	6726.13	5698.91	7940.27	9641.74
IPI:IPI00059169.3	CCDC102A	Coiled-coil domain-containing protein 102A	16	4	C	UR	1047.7	1133.55	1232.96	936.933	839.064	957.988
IPI:IPI00166680.1	MINK1	Isoform 3 of Misshapen-like kinase 1	16	36	C	UR	9734.37	9848.72	9767.17	8622.32	10435.3	9588.37
IPI:IPI00023748.3	NACA	Nascent polypeptide-associated complex subunit alpha	16	149	C	UR	22589.5	20891	26285.6	19670.6	21523.4	24095.5
IPI:IPI00022133.2	EPB41L2	4.1G protein	16	2	C	UR	578.713	1434.31	1213.88	775.524	660.412	640.879
IPI:IPI00215723.1	FMR1	Isoform 3 of Fragile X mental retardation 1 protein	16	61	C	UR	21438.9	17462	17443.3	14540.2	15456.7	17453.3
IPI:IPI00645666.1	FMR1	Isoform 8 of Fragile X mental retardation 1 protein	16	9	C	UR	2251.98	2292.53	1829.39	1632.89	2007.93	2530.3
IPI:IPI00165249.2	PFTK1	Isoform 1 of Serine/threonine-protein kinase PFTAIRE-1	16	4	C	UR	1560.56	1803.05	2372.31	1735.79	1693.92	1978.03
IPI:IPI00024773.1	FARP1	Isoform 1 of FERM, RhoGEF and pleckstrin domain-containing protein 1	16	37	C	UR	10080.2	10899.8	17950	14243.5	9088.81	11150.1
IPI:IPI00376955.3	PCTK2	Serine/threonine-protein kinase PCTAIRE-2	16	19	C	UR	4424.09	6609.86	5770.86	4557.74	5437.99	5737.82
IPI:IPI00383457.1	PCTK3	PCTK3 protein	16	4	C	UR	1616.05	1316.95	1202.12	1026.47	1381.62	1489.51
IPI:IPI00171844.3	COPS4	COP9 signalosome complex subunit 4	16	117	C	UR	26294.3	29406.6	29628.5	29363	28075.4	33069.2
IPI:IPI00549858.6	PCTK1	Serine/threonine-protein kinase PCTAIRE-1	16	13	C	UR	5639.72	4175.83	4114.47	4102.77	4345.52	5611.19
IPI:IPI00010843.3	APBB1	Isoform 1 of Amyloid beta A4 precursor protein-binding family B member 1	16	18	C	UR	5939.74	4378.02	4921.37	5071.99	4702.09	5228.93
IPI:IPI00329321.3	LYRM7	LYR motif-containing protein 7	16	7	C	UR	1899.07	2202.58	2849.87	3455.67	4374.15	2660.2
IPI:IPI00854642.1	PDS5A	Isoform 1 of Sister chromatid cohesion protein PDS5 homolog A	16	181	C	UR	42777.8	45859.2	44666	62050.6	59847.7	59414.7
IPI:IPI00240812.6	PDS5B	Isoform 1 of Sister chromatid cohesion protein PDS5 homolog B	16	210	C	UR	54849.5	55671.7	60474	71527.5	75326.6	56178
IPI:IPI00604711.3	KIF1A	Isoform 1 of Kinesin-like protein KIF1A	16	106	C	UR	14787.7	21237	27742.2	23044.8	25921.3	30122.7
IPI:IPI00103483.1	COBRA1	Negative elongation factor B	16	61	C	UR	12102.8	16721.4	17870	17045.8	17760.8	20481.4
IPI:IPI00179757.6	KIF1C	Kinesin-like protein KIF1C	16	46	C	UR	11268.2	10984.8	11985.5	10006.8	10821	13449.9
IPI:IPI00290770.3	CCT3	chaperonin containing TCP1, subunit 3 isoform b	16	476	C	UR	88834.7	102622	102496	97639.6	96675.4	99078.7
IPI:IPI00411763.2	KIF1B	Isoform 3 of Kinesin-like protein KIF1B	16	9	C	UR	1906.9	3302.34	2661.84	1578.23	1604.77	2033.09
IPI:IPI00479529.2	KIF13B	203 kDa protein	16	78	C	UR	26392	21699.7	16181.6	19696.3	25679.6	30503.8
IPI:IPI00455518.5	MORC2	MORC family CW-type zinc finger protein 2	16	72	C	UR	22289.1	21013.2	21437.9	17402	20253	23068.1
IPI:IPI00871951.1	CCDC6	coiled-coil domain containing 6	16	87	C	UR	50844.3	37676.4	25692.3	22471.3	25438.7	28479.6
IPI:IPI00216252.5	KIF1B	Isoform 2 of Kinesin-like protein KIF1B	16	59	C	UR	16406.1	20170.8	19578	16022.2	18399	21072.5
IPI:IPI00181728.1	BXDC2	Brix domain-containing protein 2	16	52	C	UR	13570.7	11532.1	11756	11532.2	9770.34	9231.94
IPI:IPI00171791.5	NIN	Isoform 3 of Ninein	16	14	C	UR	4643.74	3704.57	3637.03	3389.32	3388.82	3209.78
IPI:IPI00005142.1	FGFR1	Isoform 1 of Basic fibroblast growth factor receptor 1	16	7	C	UR	1472.94	1761.02	1719.22	2300	2340.95	1626.97
IPI:IPI00164861.3	KIF13A	Isoform 3 of Kinesin-like protein KIF13A	16	21	C	UR	6587.25	5342.16	3820.06	4260.3	6340.48	6974.67
IPI:IPI00385562.1	QKI	Isoform 6 of Protein quaking	16	33	C	UR	5877.65	8371.19	8682.05	7588.96	7048.79	7595.91
IPI:IPI00736672.2	QKI	Isoform 3 of Protein quaking	16	2	C	UR	45.0764	55.3347	49.1054	28.9643	69.2625	62.9146
IPI:IPI00056318.3	GTF3C6	General transcription factor 3C polypeptide 6	16	14	C	UR	2912.2	3085.54	3759.24	4209.7	4820.19	3680.32
IPI:IPI00013890.2	SFN	Isoform 1 of 14-3-3 protein sigma	16	112	C	UR	77807	72193.6	15978.1	16951.1	22488.6	24526.5
IPI:IPI00177967.8	MPHOSPH9	Isoform 2 of M-phase phosphoprotein 9	16	4	C	UR	166.365	249.178	249.414	251.844	219.269	239.147
IPI:IPI00044353.6	MED12L	Isoform 4 of Mediator of RNA polymerase II transcription subunit 12-like protein	16	3	C	UR	454.803	467.063	576.723	567.743	507.151	685.545
IPI:IPI00306933.2	MYO9B	myosin IXB isoform 1	16	108	C	UR	31834.9	25902.8	25829.1	29176.3	28261.6	29970.8
IPI:IPI00848317.1	MYO9B	myosin IXB isoform 2	16	1	C	UR	79.0946	65.7018	70.8446	79.7575	75.8194	72.001
IPI:IPI00018057.3	MYO9A	Isoform 4 of Myosin-IXa	16	13	C	UR	4017.62	4031.36	3739.8	3776.1	4740.23	4649.51
IPI:IPI00552641.2	MYO6	Myosin VI	16	18	C	UR	11199.3	8506.79	2557.64	2234.58	10263.6	10064.1
IPI:IPI00400922.5	PDCD11	Protein RRP5 homolog	16	198	C	UR	50657.9	52618.8	62385.6	66316.4	63908.4	50366.2
IPI:IPI00300956.3	RNASEN	Isoform 1 of Ribonuclease 3	16	18	C	UR	3822.65	4181.08	4473.93	4405.73	4438.97	4662.23
IPI:IPI00011933.3	CP110	Isoform 1 of Centrosomal protein of 110 kDa	16	14	C	UR	3161.22	4092.44	4094.35	4193.23	4711.43	4749.93
IPI:IPI00304911.4	ATP6V1B1	V-type proton ATPase subunit B, kidney isoform	16	33	C	UR	22780.2	16969.6	4591.05	4452.14	4490.19	5028.04
IPI:IPI00299524.1	NCAPD2	Condensin complex subunit 1	16	210	C	UR	44110.9	48741.9	49627.9	45207.5	45254.3	50746.7
IPI:IPI00029324.1	MID1	Isoform 1 of Midline-1	16	19	C	UR	6677.51	5082.01	4626.01	4045.24	4776.01	5274.18
IPI:IPI00158992.2	SNAPC4	snRNA-activating protein complex subunit 4	16	16	C	UR	3120.71	3579.62	4506.12	3861.83	3772.39	3834.77
IPI:IPI00007812.1	ATP6V1B2	V-type proton ATPase subunit B, brain isoform	16	144	C	UR	31748.7	28707.7	29520.6	27987	28894.8	34132.7
IPI:IPI00181409.6	TMPO	Isoform Gamma of Lamina-associated polypeptide 2, isoforms beta/gamma	16	4	C	UR	182.415	359.527	364.702	340.509	307.691	389.789
IPI:IPI00103530.1	ATL1	Atlastin-1	16	13	C	UR	3414.33	3048.58	6653.15	5479.67	6529.6	8126.04
IPI:IPI00719051.3	-	82 kDa protein	16	59	C	UR	20061.6	17172.7	17330.7	17183.7	18411.9	20482.3
IPI:IPI00747200.2	C6orf203	Uncharacterized protein C6orf203	16	6	C	UR	1403.69	1210.75	1101.75	830.859	1025.16	1010.71
IPI:IPI00019432.1	NAB2	Isoform 1 of NGFI-A-binding protein 2	16	21	C	UR	5058.68	7316.68	8827.21	6380.63	5633.52	6952.63
IPI:IPI00020060.2	SLC9A1	Isoform 1 of Sodium/hydrogen exchanger 1	16	5	C	UR	1302.1	980.184	920.201	969.868	851.032	847.88
IPI:IPI00029012.1	EIF3A	Eukaryotic translation initiation factor 3 subunit A	16	446	C	UR	84137.5	89559.5	100404	87912.8	76902.3	83664.8
IPI:IPI00018840.6	TRIP4	Activating signal cointegrator 1	16	35	C	UR	8261.15	7183.1	7152.46	6700.42	7423.3	8706.42
IPI:IPI00175146.5	ZFC3H1	Isoform 2 of Zinc finger C3H1 domain-containing protein	16	40	C	UR	9081.15	14358.4	10961.3	9231.87	8782.69	9280.44
IPI:IPI00220133.2	NAB1	Isoform Short of NGFI-A-binding protein 1	16	7	C	UR	2082.82	2603.07	2725.09	2186.8	2893.77	3238.05
IPI:IPI00142538.4	SETX	Isoform 1 of Probable helicase senataxin	16	42	C	UR	12850.9	13048.7	14056.4	14506.9	13209.1	13318.9
IPI:IPI00020850.5	PPP2R2B	Serine/threonine-protein phosphatase 2A 55 kDa regulatory subunit B beta isoform	16	26	C	UR	3995.29	6291.54	6932.97	5859.86	5945.25	6732.47
IPI:IPI00332511.5	PPP2R2A	Serine/threonine-protein phosphatase 2A 55 kDa regulatory subunit B alpha isoform	16	63	C	UR	13074.6	17391.1	17906.7	16727.5	16741.4	19476.8
IPI:IPI00029485.2	DCTN1	Isoform p150 of Dynactin subunit 1	16	241	C	UR	49851.6	51974.8	54935.2	55061.6	56730.6	56093.2
IPI:IPI00019223.3	AKAP9	Isoform 1 of A-kinase anchor protein 9	16	192	C	UR	56953.3	58460.6	61311.5	53576.5	64415.4	69643.7
IPI:IPI00158615.7	THOC2	THO complex 2 isoform 1	16	121	C	UR	32508	37986.4	34788.3	40035.5	38278.8	34659.6
IPI:IPI00015286.2	DOCK1	Dedicator of cytokinesis protein 1	16	46	C	UR	12425.8	14653.3	13614	9627.13	16584	18942.5
IPI:IPI00738216.2	KIAA0947	Isoform 1 of Uncharacterized protein KIAA0947	16	5	C	UR	1710.37	1744.89	1982.2	1712.46	1474.26	1299.64
IPI:IPI00045491.3	TUBGCP6	Isoform 1 of Gamma-tubulin complex component 6	16	9	C	UR	3057.97	2564.74	2838.98	2999.75	3658.79	3614.78
IPI:IPI00014808.1	PAFAH1B3	Platelet-activating factor acetylhydrolase IB subunit gamma	16	45	C	UR	10972.7	9958.25	8410.1	7982.03	10581.2	12642.4
IPI:IPI00012535.1	DNAJA1	DnaJ homolog subfamily A member 1	16	190	C	UR	41146.6	35447.6	49712.8	49202.6	54391.7	33788.4
IPI:IPI00470920.1	PPP2R2D	Serine/threonine-protein phosphatase 2A 55 kDa regulatory subunit B delta isoform	16	6	C	UR	1420.98	2067.23	2249.5	2118.96	2150.97	2354.97
IPI:IPI00016542.5	WDR76	WD repeat-containing protein 76	16	42	C	UR	9897.54	11219.4	12471.6	12734.1	14036.2	14766.1
IPI:IPI00385042.4	GTPBP4	Nucleolar GTP-binding protein 1	16	155	C	UR	37545.3	36862.6	41364.8	40025.3	40208.2	32925.2
IPI:IPI00024167.1	ESF1	ESF1 homolog	16	89	C	UR	23203.1	28014.1	37309.3	37788.8	29956.1	20309.9
IPI:IPI00069817.2	BAZ1B	Isoform 1 of Tyrosine-protein kinase BAZ1B	16	285	C	UR	53881.5	64945.4	72067.2	92497.6	98905.8	110999
IPI:IPI00412415.2	BAZ1A	Isoform 1 of Bromodomain adjacent to zinc finger domain protein 1A	16	126	C	UR	26320.1	29106.6	35618.2	45065.5	45789.8	43735.6
IPI:IPI00141318.2	CKAP4	Isoform 1 of Cytoskeleton-associated protein 4	16	260	C	UR	54987.3	86464	109189	69873.8	61380.9	79206.6
IPI:IPI00289876.6	STX7	Isoform 1 of Syntaxin-7	16	27	C	UR	9917.36	8511.95	7176.26	6139.75	9574.87	11031.3
IPI:IPI00386862.5	ZFYVE19	Isoform 1 of Zinc finger FYVE domain-containing protein 19	16	17	C	UR	5001.68	4439.63	4734.8	4056.18	4555.41	5657.93
IPI:IPI00009316.3	PPIE	Isoform A of Peptidyl-prolyl cis-trans isomerase E	16	52	C	UR	19198.7	20165.5	20253.4	14517.9	14225.7	16841.1
IPI:IPI00017580.1	KIN	DNA/RNA-binding protein KIN17	16	27	C	UR	11888.1	9499.24	9565.79	11166.4	11349.2	9451.8
IPI:IPI00168317.1	SPC24	Kinetochore protein Spc24	16	22	C	UR	4048.78	5122.5	4575.23	4052.37	4976.33	6362.64
IPI:IPI00006499.8	KIAA0753	Isoform 1 of Uncharacterized protein KIAA0753	16	2	C	UR	242.534	287.256	318.235	283.459	236.617	227.66
IPI:IPI00007731.1	BAG5	BAG family molecular chaperone regulator 5	16	24	C	UR	5711.21	5050.12	5849.25	7298.47	6732.04	6807.12
IPI:IPI00168325.4	STK3	cDNA FLJ90748 fis, clone PLACE1011824, highly similar to Human Ste20-like kinase (MST2) mRNA	16	11	C	UR	4762.49	4287.43	3763.93	3643.27	4674.39	5495.43
IPI:IPI00017731.1	SEPT5	Septin-5	16	55	C	UR	7726.15	17202.7	15365.1	10308.6	16853.9	18973.9
IPI:IPI00816201.1	SEPT7	Isoform 2 of Septin-7	16	159	C	UR	46991.4	41978.9	39920.6	42418.1	39212.3	43176.1
IPI:IPI00013743.4	BUD13	Isoform 1 of BUD13 homolog	16	37	C	UR	9150.22	9871.26	10822.6	11172.2	9785.43	10804
IPI:IPI00871372.1	HECTD1	HECT domain containing 1	16	64	C	UR	18701.7	14303.4	23940.8	15910.3	16432.7	14591.1
IPI:IPI00031104.5	TCHP	Trichoplein keratin filament-binding protein	16	1	C	UR	150.116	152.692	151.002	181.046	152.164	140.677
IPI:IPI00019172.3	SH3GL3	Isoform 1 of Endophilin-A3	16	5	C	UR	1253.39	2403.68	2092.57	2125.64	2015.88	2267.91
IPI:IPI00216134.3	TPM1	tropomyosin 1 alpha chain isoform 7	16	32	C	UR	15909.5	15041.6	8081.97	6609.37	26940	25376.1
IPI:IPI00100151.4	XRN2	Isoform 1 of 5'-3' exoribonuclease 2	16	210	C	UR	46269.4	50152.4	53255.1	63255.2	56218	53877.8
IPI:IPI00010779.4	TPM4	Isoform 1 of Tropomyosin alpha-4 chain	16	177	C	UR	34566.1	47118.4	70313.2	46364.1	51916.6	55136.1
IPI:IPI00216975.1	TPM4	Isoform 2 of Tropomyosin alpha-4 chain	16	11	C	UR	8396.17	9731.78	1728.5	1607.99	1776.52	1881.13
IPI:IPI00013991.1	TPM2	Isoform 1 of Tropomyosin beta chain	16	31	C	UR	9583.71	21912.1	22200.3	7192.89	8332.38	8618.29
IPI:IPI00014581.1	TPM1	Isoform 1 of Tropomyosin alpha-1 chain	16	53	C	UR	20754.2	21645.5	12233.8	10533	25231.3	25712.2
IPI:IPI00218319.3	TPM3	Isoform 2 of Tropomyosin alpha-3 chain	16	117	C	UR	17052.7	22383.7	28964.2	28491.4	29795.3	27791.4
IPI:IPI00218820.1	TPM2	Isoform 3 of Tropomyosin beta chain	16	6	C	UR	900.103	3677.69	4222.93	1578.07	929.513	977.5
IPI:IPI00742996.2	RNF214	RING finger protein 214	16	47	C	UR	14214.7	12538.2	13288.9	12077.2	11210.3	11871.2
IPI:IPI00304189.5	OPTN	Isoform 1 of Optineurin	16	40	C	UR	13140	12158.7	16660.7	14932.2	18517	24015.4
IPI:IPI00019169.3	SH3GL1	cDNA, FLJ96508, Homo sapiens SH3-domain GRB2-like 1 (SH3GL1), mRNA	16	70	C	UR	23401.1	29110.9	33380.1	28681.6	20787	25062.2
IPI:IPI00019171.1	SH3GL2	Endophilin-A1	16	5	C	UR	1062.94	1331.59	1317.96	1009.73	3700.93	4617.6
IPI:IPI00291376.4	TGS1	Trimethylguanosine synthase homolog	16	36	C	UR	6624.19	10093.2	9888.39	10099.1	9754.79	9025.93
IPI:IPI00014216.1	HERC3	Probable E3 ubiquitin-protein ligase HERC3	16	6	C	UR	2207.57	1901.22	2240.64	2832.33	2809.75	2764.56
IPI:IPI00030363.1	ACAT1	Acetyl-CoA acetyltransferase, mitochondrial	16	171	C	UR	41195	45182	56416	45007.7	39765.4	45617.3
IPI:IPI00005132.3	GNL3L	Guanine nucleotide-binding protein-like 3-like protein	16	27	C	UR	9896.95	7966.53	9058.65	11165.9	11188.8	8245.11
IPI:IPI00003886.3	GNL3	Isoform 2 of Guanine nucleotide-binding protein-like 3	16	107	C	UR	32759.9	28847.4	30926.6	34565.2	31152.8	25592.1
IPI:IPI00644865.1	FRMD4A	FERM domain-containing protein 4A	16	10	C	UR	1970.06	1566.13	1820.24	1623.95	2040.37	2029.27
IPI:IPI00032236.4	AMOTL2	cDNA FLJ56142, highly similar to Angiomotin-like protein 2	16	16	C	UR	3925.25	4558.78	4159.3	4265.2	2990.69	4276.83
IPI:IPI00026105.1	SCP2	Isoform SCPx of Non-specific lipid-transfer protein	16	152	C	UR	72605.6	63379.7	38461.8	40362.2	46693.9	51145.4
IPI:IPI00307200.9	SWAP70	Switch-associated protein 70	16	58	C	UR	25056.2	20138.7	20800.9	17863.6	15103.4	14334.4
IPI:IPI00903155.1	-	SWAP-70 protein, isoform CRA_b	16	1	C	UR	104.41	303.678	304.833	245.156	199.927	185.021
IPI:IPI00292537.3	NFKB1	Isoform 2 of Nuclear factor NF-kappa-B p105 subunit	16	43	C	UR	13761.6	11258.5	14180.1	13393.9	13595.1	16843.2
IPI:IPI00013290.5	HDGF2	Isoform 1 of Hepatoma-derived growth factor-related protein 2	16	84	C	UR	16413.7	18779.9	21842.3	19899.2	24638.8	29574.9
IPI:IPI00885081.1	HDGF2	Isoform 2 of Hepatoma-derived growth factor-related protein 2	16	9	C	UR	1818.5	2137.78	2133.18	2352.88	2576.23	3100.58
IPI:IPI00329536.2	EEA1	Early endosome antigen 1	16	218	C	UR	74045.6	88795.7	92306.7	73197.8	48134.2	56539.4
IPI:IPI00020956.1	HDGF	Hepatoma-derived growth factor	16	178	C	UR	55997.3	58251.5	58423.7	42285.1	50591.5	60824.1
IPI:IPI00007063.5	HDGFRP3	Hepatoma-derived growth factor-related protein 3	16	30	C	UR	4477.35	8469.13	8444.07	7604.93	13908.7	15944.9
IPI:IPI00028122.1	PSIP1	Isoform 1 of PC4 and SFRS1-interacting protein	16	196	C	UR	31824.6	53948.8	44039.4	50475.9	65328.3	67751.9
IPI:IPI00043740.3	SCLT1	Isoform 1 of Sodium channel and clathrin linker 1	16	5	C	UR	1624.58	1774.46	3033.36	2337.29	2137.84	2428.34
IPI:IPI00376383.2	CEP110	Isoform 2 of Centriolin	16	11	C	UR	2809.3	3549.88	3332.07	3748.14	3781.96	3539.92
IPI:IPI00186581.8	OS9	osteosarcoma amplified 9 isoform 2 precursor	16	31	C	UR	7296.77	6684.53	9062.36	7825.29	8808.9	9751.81
IPI:IPI00412607.6	RPL35	60S ribosomal protein L35	16	43	C	UR	7353.52	6120.9	11010	15496.2	15700.5	12608.3
IPI:IPI00015213.1	DAPK3	Death-associated protein kinase 3	16	19	C	UR	5076.97	4498.02	5415.97	4357.26	3488.59	3970.11
IPI:IPI00220059.5	NDUFB4	NADH dehydrogenase [ubiquinone] 1 beta subcomplex subunit 4	16	13	C	UR	3546.3	3312.9	3789.23	3413.13	3517.95	3748.55
IPI:IPI00028957.2	UBE4A	Isoform 2 of Ubiquitin conjugation factor E4 A	16	40	C	UR	12581.6	12574.5	12228.5	10650.6	11667.6	13423.6
IPI:IPI00012391.3	APC	Isoform Long of Adenomatous polyposis coli protein	16	24	C	UR	7067.55	6362.83	6610.44	5137.69	5936.58	5680.46
IPI:IPI00420014.2	SNRNP200	Isoform 1 of U5 small nuclear ribonucleoprotein 200 kDa helicase	16	530	C	UR	128200	130225	132681	130334	133364	141627
IPI:IPI00008200.2	YEATS2	YEATS domain-containing protein 2	16	25	C	UR	6972.6	8570.78	7931.81	8813.68	9415.13	8557.84
IPI:IPI00020164.1	PTP4A1	Protein tyrosine phosphatase type IVA 1	16	14	C	UR	5189.89	4492.77	5314.19	7688.49	8994.25	5879.66
IPI:IPI00020191.1	PTP4A2	Isoform 1 of Protein tyrosine phosphatase type IVA 2	16	2	C	UR	1020.64	802.344	935.333	2516	3009.69	820.8
IPI:IPI00024299.4	SNUPN	cDNA FLJ30079 fis, clone BGGI12000544, highly similar to Snurportin-1	16	11	C	UR	3145.08	2814.82	2726.06	3142.69	3017.24	3226
IPI:IPI00029273.1	MET	Isoform 1 of Hepatocyte growth factor receptor	16	3	C	UR	1259.41	927.4	544.388	459.02	2210.19	1458.24
IPI:IPI00328867.6	SRC	Isoform 2 of Proto-oncogene tyrosine-protein kinase Src	16	16	C	UR	4306.61	3932.86	3608.44	5425.41	5718.39	5350.16
IPI:IPI00303120.5	TMEM143	Isoform 1 of Transmembrane protein 143	16	1	C	UR	14.3743	16.7497	24.1769	17.1743	22.7188	24.6251
IPI:IPI00011970.3	HSD17B7	Isoform 1 of 3-keto-steroid reductase	16	22	C	UR	7034.84	5898.43	6951.28	6821.89	7391.28	7301.38
IPI:IPI00374732.4	PPIAP19	similar to peptidylprolyl isomerase A-like	16	284	C	UR	77036.1	63408.2	48139.9	53740.5	48450.3	51709.3
IPI:IPI00024129.1	PPIC	Peptidyl-prolyl cis-trans isomerase C	16	11	C	UR	6211.8	4368.34	1001.66	864.712	3317.11	3770.96
IPI:IPI00293756.5	VAMP5	Vesicle-associated membrane protein 5	16	1	C	UR	419.198	426.87	460.173	468.991	622.512	308.862
IPI:IPI00165459.7	SETD1B	Histone-lysine N-methyltransferase SETD1B	16	4	C	UR	1256.17	1312.01	1352.87	1528.18	1360.05	1405.94
IPI:IPI00020468.4	SELS	Selenoprotein S	16	4	C	UR	1034.03	842.87	799.104	786.472	867.221	732.927
IPI:IPI00470867.5	RPGRIP1L	Isoform 1 of Protein fantom	16	2	C	UR	608.876	315.695	368.973	432.721	391.857	441.877
IPI:IPI00016447.5	COMMD8	COMM domain-containing protein 8	16	11	C	UR	2694.79	2807.22	3359.79	3001.58	4658.86	5462.39
IPI:IPI00026036.3	DPP8	Isoform 5 of Dipeptidyl peptidase 8	16	7	C	UR	1901.19	2264.27	2408.33	2601.72	2620.73	2886.18
IPI:IPI00465149.3	DPP9	Isoform 1 of Dipeptidyl peptidase 9	16	46	C	UR	14669.8	13301.7	15621.1	17336.1	17831.2	14272.2
IPI:IPI00029513.1	NOL10	Isoform 1 of Nucleolar protein 10	16	37	C	UR	11417	9603.06	10831.2	11137.2	10569.8	9271.04
IPI:IPI00004924.3	DEF6	Differentially expressed in FDCP 6 homolog	16	36	C	UR	8327.87	7582.23	8120.63	25806.6	27281.4	9164.4
IPI:IPI00018274.1	EGFR	Isoform 1 of Epidermal growth factor receptor	16	219	C	UR	179512	127750	22353.9	20500.7	29461.2	31888.5
IPI:IPI00000977.1	MAP3K11	Mitogen-activated protein kinase kinase kinase 11	16	7	C	UR	1335.2	1105.6	1515.36	1329.8	1457.02	1548.49
IPI:IPI00016371.1	ERBB4	Isoform JM-A of Receptor tyrosine-protein kinase erbB-4	16	26	C	UR	29855.5	21124.9	3292.23	3159.63	4393.59	4754.29
IPI:IPI00300384.3	ERBB2	Receptor tyrosine-protein kinase erbB-2	16	5	C	UR	791.012	1141.39	1217.12	1371.72	2496.69	4422.11
IPI:IPI00554793.2	MYCBP	C-Myc-binding protein	16	9	C	UR	3375.73	3305.14	4448.67	6331.97	6544.4	3587.78
IPI:IPI00329389.8	RPL6	60S ribosomal protein L6	16	126	C	UR	37838.7	34382.5	39335.4	37812.4	36019.4	34287
IPI:IPI00185361.5	DDX55	ATP-dependent RNA helicase DDX55	16	26	C	UR	6758.9	8195.58	8108.1	11651.6	11387.9	7224.36
IPI:IPI00000885.1	FRK	Tyrosine-protein kinase FRK	16	3	C	UR	697.348	518.477	434.001	463.464	403.509	447.053
IPI:IPI00926449.1	RGPD1	Protein	16	6	C	UR	1750.84	1784.87	1898.9	1838.29	1955.62	1769.92
##IPI:IPI00001580.4	FYCO1	Isoform 1 of FYVE and coiled-coil domain-containing protein 1	16	1	C	UR	719.163	554.372	577.592	523.048	351.203	620.385
IPI:IPI00006091.2	DMD	Isoform 4 of Dystrophin	16	5	C	UR	952.978	692.426	631.521	587.63	719.114	872.937
IPI:IPI00219156.7	RPL30	60S ribosomal protein L30	16	133	C	UR	29714.8	28963	33763.7	32634.2	29678.1	29201.4
IPI:IPI00013260.3	LSP1;LOC390387	Lymphocyte-specific protein 1	16	12	C	UR	1949.54	1671.59	1967.44	9797.04	9362.24	2272.44
IPI:IPI00103599.1	BRI3BP	BRI3-binding protein	16	11	C	UR	2153.1	2510.24	3011.86	2462.78	3405.73	4069.72
IPI:IPI00005018.3	UBP1	Isoform 1 of Upstream-binding protein 1	16	8	C	UR	2413.34	1961.8	2247.24	2474.73	2274.48	2379.63
IPI:IPI00397904.6	NUP93	Nuclear pore complex protein Nup93	16	232	C	UR	61178.8	59337	68167.8	74856.2	78009.6	56134.8
IPI:IPI00397348.5	AVL9	Isoform 1 of Late secretory pathway protein AVL9 homolog	16	31	C	UR	7953.2	6752.59	6275.75	5305.88	6969.49	8304.66
IPI:IPI00014472.1	C21orf2	Isoform Long of Uncharacterized protein C21orf2	16	3	C	UR	749.634	835.616	866.716	1024.24	1004.85	1066.44
IPI:IPI00000296.2	C3orf10	Isoform 1 of Probable protein BRICK1	16	7	C	UR	1553.05	1548.92	1770.29	1721.11	1866.25	1923.72
IPI:IPI00022449.6	DOCK2	Isoform 1 of Dedicator of cytokinesis protein 2	16	109	C	UR	19294	17358.5	19182.6	91689.7	75514.3	22533.6
IPI:IPI00746684.4	DOCK5	Isoform 1 of Dedicator of cytokinesis protein 5	16	4	C	UR	1454.06	1113.05	1011.36	1098.19	970.813	1238.8
IPI:IPI00006864.3	MRPL33	39S ribosomal protein L33, mitochondrial	16	8	C	UR	2491.19	2521.6	3173.99	2635.17	2504.04	3009
IPI:IPI00011736.3	PIK3R2	Phosphatidylinositol 3-kinase regulatory subunit beta	16	19	C	UR	6999.8	6231.54	5825.68	5729.35	7374.62	7503.91
IPI:IPI00220498.1	PIK3R3	Isoform 2 of Phosphatidylinositol 3-kinase regulatory subunit gamma	16	2	C	UR	1162.33	813.12	635.257	653.932	585.162	735.599
IPI:IPI00296938.1	TMEM57	Isoform 1 of Macoilin	16	21	C	UR	9310.08	7198.76	6760.1	7090.93	7239.71	7326.42
IPI:IPI00021448.2	PIK3R1	Isoform 1 of Phosphatidylinositol 3-kinase regulatory subunit alpha	16	25	C	UR	6846.87	6529.12	7736.29	8912.63	10036.8	8446.11
IPI:IPI00064474.4	ZC3H10	Zinc finger CCCH domain-containing protein 10	16	1	C	UR	122.497	110.17	107.634	109.002	86.3809	94.5059
IPI:IPI00719261.1	PEX26	Pex26pintG231T	16	1	C	UR	221.303	206.644	176.535	167.562	188.641	215.199
IPI:IPI00030273.1	MST1R	Isoform RON of Macrophage-stimulating protein receptor	16	1	C	UR	194.485	186.004	205.169	180.089	160.14	194.607
IPI:IPI00103341.3	TRUB1	Probable tRNA pseudouridine synthase 1	17	27	C	UR	6848.22	9060.5	10072.8	8124.28	9980.12	9055.03
IPI:IPI00006451.6	NSF	Vesicle-fusing ATPase	17	151	C	UR	44859.4	52052.8	49616.4	39337.9	51396.6	61277.5
IPI:IPI00017669.5	SMARCE1	Isoform 1 of SWI/SNF-related matrix-associated actin-dependent regulator of chromatin subfamily E member 1	17	92	C	UR	18521.9	20798.3	20201.6	26870.1	27479.9	31291.9
IPI:IPI00470489.1	SMARCE1	Isoform 2 of SWI/SNF-related matrix-associated actin-dependent regulator of chromatin subfamily E member 1	17	1	C	UR	401.995	333.774	419.738	425.026	392.007	393.933
IPI:IPI00647707.3	ADCK4	Isoform 1 of Uncharacterized aarF domain-containing protein kinase 4	18	12	C	UR	4575.27	3763.29	3372.31	2822.68	3438.11	3825.73
IPI:IPI00171186.1	PDCD7	Programmed cell death protein 7	19	6	C	UR	1515.95	1767.85	2665.38	2500.02	2220.44	1988.65
IPI:IPI00013070.2	HNRNPUL1	Isoform 1 of Heterogeneous nuclear ribonucleoprotein U-like protein 1	19	253	C	UR	66806.3	62520.4	58521.1	62087.7	61468	63724.5
IPI:IPI00644079.2	HNRNPU	heterogeneous nuclear ribonucleoprotein U isoform a	19	21	C	UR	6275.68	4840.59	5004.28	4713.13	5902.41	6854.19
IPI:IPI00479217.1	HNRNPU	Isoform Short of Heterogeneous nuclear ribonucleoprotein U	19	507	C	UR	104455	123364	126753	128559	137685	142510
IPI:IPI00604491.1	ZCCHC6	Isoform 1 of Zinc finger CCHC domain-containing protein 6	20	31	C	UR	9035.01	7618.52	7261.33	7393.46	8353.59	9050.2
IPI:IPI00289861.4	ZCCHC11	Isoform 1 of Zinc finger CCHC domain-containing protein 11	20	38	C	UR	14992.4	18484.9	14728.5	15146	14880	15244.2
IPI:IPI00376317.4	EDC4	Isoform 1 of Enhancer of mRNA-decapping protein 4	21	156	C	UR	35089.4	32238.1	34692.1	48286.1	46053.6	32120
IPI:IPI00009542.1	MAGED2	Isoform 1 of Melanoma-associated antigen D2	22	127	C	UR	45285.4	38524.3	32053.6	27274.6	31654.2	37996.3
IPI:IPI00328354.7	MAGED1	Isoform 1 of Melanoma-associated antigen D1	22	30	C	UR	4925.18	8651.81	8871.47	6781.58	6333.15	6546.91
IPI:IPI00015891.1	PFDN4	Prefoldin subunit 4	23	50	C	UR	11601.3	15361.3	15304.5	14985.7	14458.3	15433.6
IPI:IPI00022265.3	CCDC22	Coiled-coil domain-containing protein 22	24	50	C	UR	10954.7	9769.68	11396.1	10320.1	10921.6	12579.2
IPI:IPI00006122.5	CTAGE5	Isoform MEA6 of Cutaneous T-cell lymphoma-associated antigen 5	24	20	C	UR	6543.73	4721.77	5288.1	4922.74	4682.36	4624.63
IPI:IPI00009913.7	TTRAP	cDNA FLJ58984, highly similar to TRAF and TNF receptor-associated protein	25	8	C	UR	2365.32	2317.03	2057.53	2944.25	2839.37	2387.75
IPI:IPI00292221.3	BXDC5	Ribosome production factor 1	26	42	C	UR	8970.66	8129.81	9160.53	8830.62	8365.54	7254.24
IPI:IPI00185146.5	IPO9	Importin-9	27	115	C	UR	23419.3	31884.9	28993.6	21183.8	36070.2	40659.1
IPI:IPI00294575.7	CDC27	Cell division cycle protein 27 homolog	28	66	C	UR	13404.9	20236.8	16946.2	21577	20387.1	16754.8
IPI:IPI00009464.1	EXOSC10	Isoform 1 of Exosome component 10	29	143	C	UR	31330.8	38356.5	43731.3	45556	42427.3	37041.3
IPI:IPI00022462.2	TFRC	Transferrin receptor protein 1	30	280	C	UR	74397.5	60765.1	92832.6	96470	92374.9	60093.9
IPI:IPI00296053.3	FH	Isoform Mitochondrial of Fumarate hydratase, mitochondrial	31	322	C	UR	75841.6	64177.3	55434.1	48396.8	73832.4	87998.1
IPI:IPI00015602.1	TOMM70A	Mitochondrial import receptor subunit TOM70	32	138	C	UR	44934.9	40974.4	38433.1	42768.3	50212	51800.2
IPI:IPI00101659.6	NSUN5	Isoform 2 of Putative methyltransferase NSUN5	33	41	C	UR	8462.73	8379.08	8338.83	12202.8	11755.6	10103.9
IPI:IPI00887824.2	FLJ22184	hypothetical protein LOC80164	34	18	C	UR	2623.78	3575.32	2907.56	2294.1	6145.84	6119.67
IPI:IPI00384297.2	CBR4	Isoform 1 of Carbonyl reductase 4	35	7	C	UR	2041.2	2241	2541.1	3091.77	3644.36	1839.83
IPI:IPI00295400.1	WARS	Tryptophanyl-tRNA synthetase, cytoplasmic	36	164	C	UR	35341.5	31251.1	54989.9	88065.5	28383.5	29576.5
IPI:IPI00215948.4	CTNNA1	Isoform 1 of Catenin alpha-1	37	143	C	UR	19819.3	43760.3	55786.3	45927	41771.3	48981.3
IPI:IPI00060181.1	EFHD2	EF-hand domain-containing protein D2	38	57	C	UR	15607.2	16623	16918	17888.7	16066	17644.7
IPI:IPI00023542.6	TMED9	Transmembrane emp24 domain-containing protein 9	38	49	C	UR	12493.1	11328.3	10796.9	8005.72	9424.05	11558.4
IPI:IPI00296259.4	TMED4	Isoform 1 of Transmembrane emp24 domain-containing protein 4	38	16	C	UR	2761.37	2702.79	3349.83	2877.58	3141.57	3651.13
IPI:IPI00031091.3	EFHD1	EF-hand domain-containing protein D1	38	32	C	UR	19606.4	12833	7696.23	5310.36	9489.48	9610.2
IPI:IPI00004928.1	EGLN1	Isoform 1 of Egl nine homolog 1	39	27	C	UR	10974.7	8925.75	9790.47	8517.73	7862.71	8451.05
IPI:IPI00007001.1	MRPL11	39S ribosomal protein L11, mitochondrial	40	34	C	UR	8238.41	9112.93	12790.8	8729.42	11600.9	10312.2
IPI:IPI00744637.2	RUFY1	Isoform 1 of RUN and FYVE domain-containing protein 1	41	65	C	UR	21818.4	19404.3	17423.3	24324.3	22434.9	22766.4
IPI:IPI00465048.7	RUFY2	RUN and FYVE domain-containing 2 isoform a	41	8	C	UR	2271.56	2599.6	2475.38	2156.06	2063	2505.58
IPI:IPI00455620.3	RUFY3	RUN and FYVE domain containing 3 isoform 1	41	20	C	UR	6531.42	5889.32	6526.31	7514.54	7026.98	6726.05
IPI:IPI00908586.1	RUFY3	RUN and FYVE domain containing 3 isoform 3	41	1	C	UR	127.066	112.105	176.274	123.796	150.864	138.328
IPI:IPI00549766.2	FAM40A	Isoform 1 of Protein FAM40A	42	32	C	UR	8981.03	7415.97	8365	8815.15	9255.33	9429.25
IPI:IPI00005300.4	FAM40B	Isoform 2 of Protein FAM40B	42	5	C	UR	1307.54	1008.28	1127.61	967.183	1101.57	1361.53
IPI:IPI00016510.2	RPUSD1	RNA pseudouridylate synthase domain-containing protein 1	43	4	C	UR	587.176	548.245	657.564	633.812	637.182	492.665
IPI:IPI00152082.1	C7orf47	UPF0683 protein C7orf47	44	7	C	UR	1936.95	1731.79	1981.45	2266.24	2567.73	2378.66
IPI:IPI00219034.3	NDUFA8	NADH dehydrogenase [ubiquinone] 1 alpha subcomplex subunit 8	45	13	C	UR	3783.01	3651.57	3892.94	4121	3990.35	3542.82
IPI:IPI00018240.8	SDAD1	Isoform 1 of Protein SDA1 homolog	46	28	C	UR	9833.68	10575.1	9830.37	16076.5	13767.7	10705.9
IPI:IPI00552587.1	GADD45GIP1	Growth arrest and DNA-damage-inducible proteins-interacting protein 1	47	42	C	UR	6579.54	7049.43	9055.68	8428.15	8336.03	8989.98
IPI:IPI00926109.1	DHX30	Isoform 2 of Putative ATP-dependent RNA helicase DHX30	48	129	C	UR	30897.4	30389.8	35256.8	37726.7	43378.7	46313.6
IPI:IPI00004457.3	AOC3	Membrane primary amine oxidase	49	1	C	UR	132.123	259.21	153.21	107.092	200.603	301.741
IPI:IPI00375684.6	C4orf41	Isoform 3 of UPF0636 protein C4orf41	50	35	C	UR	8868.6	8623.45	9138.27	9697.46	10004	11320
IPI:IPI00102575.4	ATAD5	Isoform 1 of ATPase family AAA domain-containing protein 5	51	25	C	UR	6047.42	5028.62	5258.37	7185.95	7225.42	6611.05
IPI:IPI00013894.1	STIP1	Stress-induced-phosphoprotein 1	52	460	C	UR	132719	129118	155202	119498	106707	99595.3
IPI:IPI00032826.1	ST13	Hsc70-interacting protein	52	189	C	UR	48227.1	50252.8	58494.5	60016.2	52545.1	56568.6
IPI:IPI00337541.3	NNT	NAD(P) transhydrogenase, mitochondrial	53	210	C	UR	54199.5	47180.1	51159.4	62503.2	79145.5	77425.8
IPI:IPI00375358.2	RFC1	Isoform 1 of Replication factor C subunit 1	54	131	C	UR	27946.9	32109.7	34809.1	51154.9	50591.1	39712.2
IPI:IPI00293946.5	UBXN4	UBX domain-containing protein 4	55	58	C	UR	16620.5	14484	14574.7	13657.8	15978.5	15724.4
IPI:IPI00909984.1	ANK3	cDNA FLJ58990, highly similar to Ankyrin-3	56	69	C	UR	33955.6	24495.2	11248.4	10261.8	17884.9	19647.3
IPI:IPI00004461.2	DGUOK	Isoform 1 of Deoxyguanosine kinase, mitochondrial	56	12	C	UR	1635.43	1840.04	2027.33	2692.44	3075.61	3334.33
IPI:IPI00020454.1	DCK	Deoxycytidine kinase	56	66	C	UR	13624.5	14802.7	15007.1	29000.6	29479.2	27262.7
IPI:IPI00007834.2	ANK2	Isoform 1 of Ankyrin-2	56	13	C	UR	4650.02	3472.87	2096.54	1974.46	3459.9	3841.92
IPI:IPI00216697.3	ANK1	Isoform Er1 of Ankyrin-1	56	5	C	UR	1912.66	1465.17	703.211	633.684	1192.78	1272.02
IPI:IPI00011069.1	UNG	Isoform 2 of Uracil-DNA glycosylase	57	28	C	UR	5629.88	8098.3	7872.89	11454.3	8808.9	5466.16
IPI:IPI00641339.2	BCAR1	cDNA FLJ55515, highly similar to Breast cancer anti-estrogen resistanceprotein 1	58	10	C	UR	4588.52	4319.52	3115.52	2698.54	2676.39	2994.69
IPI:IPI00102059.2	SCYL1	Isoform 1 of N-terminal kinase-like protein	59	73	C	UR	26803.9	20881.3	19911	17380.9	16385.9	18242.3
IPI:IPI00024307.1	EFNB1	Ephrin-B1	60	14	C	UR	3787.03	13263.1	8622.22	6210.17	4825.53	4946.46
IPI:IPI00005126.1	EFNB2	Ephrin-B2	60	2	C	UR	274.935	216.516	100.063	96.6709	458.013	319.086
IPI:IPI00163505.2	RBM39	Isoform 1 of RNA-binding protein 39	61	115	C	UR	27390.8	25172.7	28642.2	37710.3	36840.5	31667.9
IPI:IPI00376960.5	RBM23	Isoform 2 of Probable RNA-binding protein 23	61	4	C	UR	479.795	548.288	784.799	565.695	615.261	1049.08
IPI:IPI00014235.3	RAB3GAP1	Isoform 1 of Rab3 GTPase-activating protein catalytic subunit	62	112	C	UR	36914.7	29414.9	30179.9	27984.4	34924.9	41067.1
IPI:IPI00871260.2	ZNF827	Zinc finger, C2H2-type domain containing protein	63	3	C	UR	482.897	385.489	409.626	347.519	504.281	528.181
IPI:IPI00015833.1	CHCHD3	Coiled-coil-helix-coiled-coil-helix domain-containing protein 3, mitochondrial	64	81	C	UR	23630.9	21515.6	25298.1	25790.1	28353	24298.4
IPI:IPI00166010.6	CNOT1	Isoform 1 of CCR4-NOT transcription complex subunit 1	65	217	C	UR	60581	59349.5	59985.3	68217.6	68024.6	62032.1
IPI:IPI00401829.4	C14orf38	Uncharacterized protein C14orf38	65	7	C	UR	2560.74	1090.21	1239.11	1435.35	1545.12	2786.14
IPI:IPI00183054.1	MIB1	E3 ubiquitin-protein ligase MIB1	66	23	C	UR	5391.42	5948.2	5853.38	4783.4	5132.31	5666.58
IPI:IPI00021363.2	KDM5A	Histone demethylase JARID1A	67	27	C	UR	5688.73	6057.38	6305.19	6169.87	6735.92	6672.31
IPI:IPI00002579.4	KDM5B	190 kDa protein	67	20	C	UR	4846.45	4703.45	3006.82	3465.39	4988.19	4584.24
IPI:IPI00013185.8	KDM5C	Isoform 1 of Lysine-specific demethylase 5C	67	55	C	UR	15803.3	14398	16249.7	13176.8	15057.1	17066.6
IPI:IPI00909864.1	KDM5A	cDNA FLJ50105, highly similar to Jumonji/ARID domain-containing protein 1A (Fragment)	67	1	C	UR	310.022	267.48	152.957	247.23	229.518	195.981
IPI:IPI00008943.3	DDX19B	Isoform 1 of ATP-dependent RNA helicase DDX19B	67	97	C	UR	27072	27283.5	30287.3	27807.6	26455.8	24057.4
IPI:IPI00019918.5	DDX19A	ATP-dependent RNA helicase DDX19A	67	37	C	UR	8591.92	9213.78	10115.5	11783.4	10807.1	7339.62
IPI:IPI00000875.7	EEF1G	cDNA FLJ56389, highly similar to Elongation factor 1-gamma	68	321	C	UR	91152.1	79543.1	117718	99917.2	60338.6	71456.1
IPI:IPI00219962.2	TCF7	Isoform 2L of Transcription factor 7	69	11	C	UR	1561.73	1879.37	1914.02	6675.75	5142.87	2544.85
IPI:IPI00007156.1	LEF1	Isoform 1 of Lymphoid enhancer-binding factor 1	69	42	C	UR	5228.32	5270.21	6231.17	30397.1	24387.2	6652.69
IPI:IPI00164708.2	TCF7L2	Isoform 1 of Transcription factor 7-like 2	69	2	C	UR	212.367	484.577	1092.82	1816.18	771.49	381.728
IPI:IPI00010396.1	TCF7L1	Transcription factor 7-like 1	69	1	C	UR	361.665	326.39	379.985	265.588	351.928	387.536
IPI:IPI00761140.1	CAST	calpastatin isoform h	70	89	C	UR	53658.6	38734.2	15576.4	14742.6	15097	15933.5
IPI:IPI00302047.3	CAST	cDNA FLJ77737, highly similar to Homo sapiens calpastatin (CAST), transcript variant 3, mRNA	70	97	C	UR	64873.9	51315	22157.8	19680.8	22170.5	24017
IPI:IPI00011118.2	RRM2	Ribonucleoside-diphosphate reductase subunit M2	71	137	C	UR	28105.8	38545.7	30658.5	31628	31342.1	31945.9
IPI:IPI00100213.2	RRM2B	Isoform 1 of Ribonucleoside-diphosphate reductase subunit M2 B	71	8	C	UR	1964.85	1897.36	1678.87	1703.68	2059.5	2278.45
IPI:IPI00295851.4	COPB1	Coatomer subunit beta	72	274	C	UR	66691.1	57699.5	69392	61407.8	55659.1	59661.1
IPI:IPI00019376.7	SEPT11	cDNA FLJ53374, highly similar to Septin-11	73	107	C	UR	32679.2	32522.1	29840	33972.1	31110.7	33259.6
IPI:IPI00022082.7	SEPT8	Isoform 2 of Septin-8	73	26	C	UR	8322.2	7344	4980.5	4865.22	6815.61	8664.63
IPI:IPI00374970.4	SEPT10	Isoform 1 of Septin-10	73	46	C	UR	16248	12304.3	11650.4	9004.05	6261.89	7503.44
IPI:IPI00216139.3	SEPT6	Isoform I of Septin-6	73	57	C	UR	11430.8	9591.55	10086.8	20535	15706.2	9519.68
IPI:IPI00024802.1	BTAF1	TATA-binding protein-associated factor 172	74	79	C	UR	18810.7	16990.3	18939.6	21463.6	22492.8	20265.5
IPI:IPI00479069.1	HEATR5B	Isoform 1 of HEAT repeat-containing protein 5B	75	45	C	UR	15097.3	11506.4	11233.5	10830.3	11512.5	13054.4
IPI:IPI00471978.3	C2CD2	C2 domain-containing protein 2	76	6	C	UR	1902.24	1597.51	1164.74	1033.87	1187.74	1637.03
IPI:IPI00171518.4	SLAIN1	cDNA FLJ55194	77	15	C	UR	1760.5	3203.33	7418.49	4761.03	2318.72	2800.82
IPI:IPI00016910.1	EIF3CL;EIF3C	Eukaryotic translation initiation factor 3 subunit C	77	233	C	UR	44884.5	44683.4	54502.2	44694.2	44626.5	48371.1
IPI:IPI00554590.1	RAB3GAP2	Isoform 1 of Rab3 GTPase-activating protein non-catalytic subunit	78	123	C	UR	39512.1	31589.5	33087.3	30337.8	38912.9	44266.5
IPI:IPI00030695.1	BAG4	BAG family molecular chaperone regulator 4	78	41	C	UR	5806.31	7452.81	6673.73	6700.02	6559.48	6385.44
IPI:IPI00101734.5	FAM105B	Protein FAM105B	79	35	C	UR	15203.3	12730	9140.38	12316.7	13671.2	12929
IPI:IPI00156793.5	XPC	DNA repair protein complementing XP-C cells	80	29	C	UR	5586.94	5851.07	10275.8	12762.3	9322.08	10187.7
IPI:IPI00924991.1	XPC	xeroderma pigmentosum, complementation group C isoform 2	80	5	C	UR	498.085	501.577	771.66	896.079	802.683	754.28
IPI:IPI00376199.4	IRF2BP2	Isoform 1 of Interferon regulatory factor 2-binding protein 2	81	50	C	UR	8925.24	6771.22	6809	6824.91	5975.35	6294.45
IPI:IPI00019205.1	C14orf4	Enhanced at puberty protein 1	81	55	C	UR	15986.8	16739.3	20120.2	16243.9	15845.4	17767.3
IPI:IPI00645608.2	IRF2BP1	Interferon regulatory factor 2-binding protein 1	81	66	C	UR	12899.3	12408.4	13119.2	13375.6	14836.6	15621.3
IPI:IPI00335541.4	TIMELESS	Isoform 1 of Protein timeless homolog	82	65	C	UR	9876.09	15514.4	15980.9	18019.2	18901.8	16901.1
IPI:IPI00639996.3	ARAP1	Isoform 3 of Arf-GAP, Rho-GAP domain, ANK repeat and PH domain-containing protein 1	83	59	C	UR	14349	13001.3	14211.4	12660.6	12793.7	14204.4
IPI:IPI00306301.2	PDHA1	Mitochondrial PDHA1	84	110	C	UR	39061.8	32192.8	25716	27313.9	26244.4	30046.8
IPI:IPI00642732.2	-	cDNA FLJ52314, highly similar to Pyruvate dehydrogenase E1 component alpha subunit, somatic form, mitochondrial	84	1	C	UR	979.35	623.649	805.773	952.91	985.012	783.619
IPI:IPI00024087.3	PDHA2	Pyruvate dehydrogenase E1 component subunit alpha, testis-specific form, mitochondrial	84	17	C	UR	3602.98	3280.37	2467.25	2653.75	2833.96	2856.84
IPI:IPI00026219.4	CPSF1	Cleavage and polyadenylation specificity factor subunit 1	85	121	C	UR	31206.2	32038.8	34954.9	32925.7	37458.3	41816.8
IPI:IPI00296789.2	FBXO3	Isoform 1 of F-box only protein 3	85	22	C	UR	10960.6	6686.68	7703.13	5111.48	4712.22	5060.41
IPI:IPI00414985.2	C13orf27	Uncharacterized protein C13orf27	86	7	C	UR	1555.64	1110.15	1477.29	1786.58	2095.15	1517.78
IPI:IPI00026087.1	BANF1	Barrier-to-autointegration factor	86	47	C	UR	13144.8	12108.4	15215.2	12151.2	9559.26	10769.4
IPI:IPI00005465.1	TSPYL2	Testis-specific Y-encoded-like protein 2	86	4	C	UR	1111.2	918.304	1328.41	1157.8	1044.96	1078.08
IPI:IPI00017763.6	NAP1L4	cDNA FLJ59403, highly similar to Nucleosome assembly protein 1-like 4	87	86	C	UR	18738.4	23831.1	23815.4	26757.1	27055.6	25973.4
IPI:IPI00789437.1	NAP1L4	32 kDa protein	87	13	C	UR	1783.04	1856.76	1919.51	2127.75	1968.48	2905.51
IPI:IPI00023860.1	NAP1L1	Nucleosome assembly protein 1-like 1	87	250	C	UR	30549.1	58626.1	55155.9	49722.9	41652.4	42840.7
IPI:IPI00154473.5	GFM1	Elongation factor G 1, mitochondrial	88	94	C	UR	26716.5	23433.2	27220.9	28675	28593.9	27416.2
IPI:IPI00410249.8	SLC39A11	Isoform 2 of Zinc transporter ZIP11	89	5	C	UR	1371.9	1222.72	746.444	776.668	910.729	1057.63
IPI:IPI00009771.6	LMNB2	Lamin-B2	90	290	C	UR	53436.8	81526.1	84630.2	72681	65914.3	72560
IPI:IPI00021405.3	LMNA	Isoform A of Lamin-A/C	90	527	C	UR	234470	206525	116194	107522	63798.5	77218
IPI:IPI00216952.1	LMNA	Isoform C of Lamin-A/C	90	4	C	UR	520.985	332.626	304.09	248.784	260.705	312.502
IPI:IPI00217975.4	LMNB1	Lamin-B1	90	636	C	UR	128793	120528	127669	182233	167494	172636
IPI:IPI00171833.2	CCDC104	Isoform 1 of Coiled-coil domain-containing protein 104	90	10	C	UR	3732.23	4555.8	4623.44	4251.76	3536.19	3949.76
IPI:IPI00102313.3	SRA1	Steroid receptor RNA activator 1, isoform CRA_a	90	18	C	UR	4269.88	3767.27	4855.49	3933.57	4030.21	4535.92
IPI:IPI00641181.5	MARCKSL1	MARCKS-related protein	91	179	C	UR	28898.3	25571.9	26500.3	27596.5	31714.8	36379.2
IPI:IPI00219301.7	MARCKS	Myristoylated alanine-rich C-kinase substrate	91	112	C	UR	68555.1	46426.9	18604.5	17869.5	28400.6	30892.1
IPI:IPI00216654.2	NOLC1	Isoform Beta of Nucleolar phosphoprotein p130	92	176	C	UR	30605.6	35807.4	63197	62167.6	62055.2	38677.9
IPI:IPI00140420.4	SND1	Staphylococcal nuclease domain-containing protein 1	93	436	C	UR	118510	99977.2	107978	128016	129600	97515.1
IPI:IPI00004497.2	BCR	Isoform 1 of Breakpoint cluster region protein	94	48	C	UR	13169.8	11965.5	14386.8	12419	13309	15060.4
IPI:IPI00329488.4	ABL2	Isoform IB of Tyrosine-protein kinase ABL2	94	13	C	UR	2607.09	2813.5	2815.93	2337.76	3966.88	3973.84
IPI:IPI00030389.1	ABR	Isoform Long of Active breakpoint cluster region-related protein	94	24	C	UR	8999.16	13267.3	12435.4	9709.05	10856.2	13325.6
IPI:IPI00216969.3	ABL1	Isoform IA of Proto-oncogene tyrosine-protein kinase ABL1	94	24	C	UR	5467.07	6129.32	6275.7	5648.69	6592.91	7385.29
IPI:IPI00034280.2	DHRS11	Isoform 1 of Dehydrogenase/reductase SDR family member 11	95	8	C	UR	4411.68	4042.56	1767.83	2420.21	3797.88	4706.31
IPI:IPI00026795.4	C6orf134	Isoform 4 of UPF0635 protein C6orf134	96	13	C	UR	2419.26	2638.31	2829.21	2405.99	2548.55	3107.16
IPI:IPI00291175.7	VCL	Isoform 1 of Vinculin	97	597	C	UR	206175	169282	222891	191215	94954.7	121445
IPI:IPI00028264.3	EXOC8	Exocyst complex component 8	98	70	C	UR	26675.8	23183.9	21060.8	20917.2	23259.3	26501.7
IPI:IPI00002335.1	HTT	Huntingtin	99	58	C	UR	15302.5	14262.5	17078	15172.4	16255.7	17746.6
IPI:IPI00291328.3	NDUFV2	NADH dehydrogenase [ubiquinone] flavoprotein 2, mitochondrial	100	73	C	UR	16115.6	14659.3	16155.1	13654.8	13179.2	13151.5
IPI:IPI00304417.7	IDH3B	Isocitrate dehydrogenase 3, beta subunit isoform a precursor	101	68	C	UR	20772.7	17824.2	18138.6	23705.8	24274.3	15171.7
IPI:IPI00220150.4	IDH3G	Isocitrate dehydrogenase [NAD] subunit gamma, mitochondrial	101	33	C	UR	7604.03	7065.92	5822.07	6427.48	7356.52	6274.49
IPI:IPI00002557.1	COPG2	Coatomer subunit gamma-2	102	119	C	UR	35398.5	28700	28109.7	31705.1	33174.1	37093.5
IPI:IPI00783982.1	COPG	Coatomer subunit gamma	102	147	C	UR	37268.1	33221.8	42412.3	38381.8	29902.4	30892.2
IPI:IPI00008787.3	NAGLU	Alpha-N-acetylglucosaminidase	103	7	C	UR	1622.77	1397.79	1325.9	1061.23	2086.88	2416.4
IPI:IPI00298423.3	PDHX	Pyruvate dehydrogenase protein X component, mitochondrial	104	84	C	UR	32362.7	29543	23718.2	20347.6	16822.8	20182.8
IPI:IPI00386208.1	-	Gastric-associated differentially-expressed protein YA61P	105	104	C	UR	43349.2	28873.8	32944.5	24561.9	27306.7	44681.3
IPI:IPI00026781.2	FASN	Fatty acid synthase	106	911	C	UR	333110	209766	212768	163280	150594	177426
IPI:IPI00384861.3	GIT1	Isoform 1 of ARF GTPase-activating protein GIT1	106	62	C	UR	13709.2	11902.3	17588.1	18588.3	18346.6	18508.9
IPI:IPI00002894.2	POLD1	DNA polymerase delta catalytic subunit	106	135	C	UR	35537.1	35700.6	34520.6	37884.2	34747.9	33322
IPI:IPI00238218.3	GIT2	Isoform 1 of ARF GTPase-activating protein GIT2	106	45	C	UR	9658.69	12423.6	10398	13040.9	11260.8	8913.33
IPI:IPI00011997.4	C8orf33	Isoform 1 of UPF0488 protein C8orf33	107	13	C	UR	3728.16	3481.41	5061.39	4661.87	4337.93	2780.54
IPI:IPI00013949.1	SGTA	Small glutamine-rich tetratricopeptide repeat-containing protein alpha	108	106	C	UR	21726.1	22243.9	27450.3	27052.8	27295.1	26523.1
IPI:IPI00171044.8	SLFN11	Schlafen family member 11	109	90	C	UR	25143.8	33861	34781.5	28088.2	23170.6	22822.8
IPI:IPI00470806.4	SLFN13	Isoform 1 of Schlafen family member 13	109	8	C	UR	2098.84	1608.5	932.567	1123.95	1225.52	1114.07
IPI:IPI00477701.2	GOSR1	golgi SNAP receptor complex member 1 isoform 2	109	18	C	UR	5475.24	4468.62	6284.29	7404.83	6556.56	5588.9
IPI:IPI00433279.3	SLFN5	Isoform 1 of Schlafen family member 5	109	37	C	UR	6254	5827.81	6181.28	8464.58	10102.7	11204.6
IPI:IPI00890837.1	SMCHD1	Isoform 1 of Structural maintenance of chromosomes flexible hinge domain-containing protein 1	109	226	C	UR	78034.2	69664.9	64661.6	54402.2	61944.4	73815.6
IPI:IPI00293026.7	EFTUD1	Isoform 1 of Elongation factor Tu GTP-binding domain-containing protein 1	109	83	C	UR	24159.3	20555.6	22692.8	26776	27441.4	29047.4
IPI:IPI00005024.3	MYBBP1A	Isoform 1 of Myb-binding protein 1A	109	144	C	UR	27360.8	31946.8	40589	35662.4	33398.9	34127.5
IPI:IPI00029997.1	PGLS	6-phosphogluconolactonase	110	65	C	UR	18319.4	17104	13697	12476.3	11626.5	13916.9
IPI:IPI00022744.5	CSE1L	Isoform 1 of Exportin-2	111	207	C	UR	55376.2	53992.2	55983.2	65208.5	65765.6	59838.5
IPI:IPI00030968.4	C9orf142	Isoform 1 of Uncharacterized protein C9orf142	112	42	C	UR	13829.6	11593.9	11060.7	10409.1	14841.3	16535.7
IPI:IPI00005745.1	SPTLC1	Serine palmitoyltransferase 1	113	68	C	UR	15891.5	18499.5	17575.2	13993.7	16509	18620.1
IPI:IPI00465045.2	DIP2B	Isoform 1 of Disco-interacting protein 2 homolog B	114	87	C	UR	25690.8	21653.1	34207.5	27399.1	26800.1	26427.3
IPI:IPI00152658.1	NEK7	Serine/threonine-protein kinase Nek7	115	41	C	UR	10487.1	16596.5	14086	10685.8	12026.6	12537.6
IPI:IPI00396662.2	NEK6	NIMA-related kinase 6 isoform 1	115	2	C	UR	691.122	1746.38	1268.08	609.671	602.526	642.556
IPI:IPI00010471.5	LCP1	Plastin-2	116	290	C	UR	46117.9	38474.8	42385.1	217919	146370	45908.3
IPI:IPI00032304.2	PLS1	Plastin-1	116	58	C	UR	32937.7	23996.6	12727.6	15046.9	17856.5	19813.6
IPI:IPI00216694.3	PLS3	Plastin-3	116	105	C	UR	67996.3	51268.4	27632.3	23097.9	20113.6	22061.4
IPI:IPI00299166.2	TANK	Isoform Long of TRAF family member-associated NF-kappa-B activator	117	13	C	UR	8127.06	5735.39	3500.65	3308.07	3502.75	4058.96
IPI:IPI00031519.3	DNMT1	Isoform 1 of DNA (cytosine-5)-methyltransferase 1	117	379	C	UR	143748	109272	101252	95654.8	85976.9	79696.8
IPI:IPI00220918.1	DNMT1	Isoform 2 of DNA (cytosine-5)-methyltransferase 1	117	3	C	UR	455.089	513.034	433.892	436.903	459.831	316.358
IPI:IPI00292914.4	ANKIB1	Ankyrin repeat and IBR domain-containing protein 1	118	6	C	UR	2280.03	1982.62	2316.93	2006.14	2288.26	2370.28
IPI:IPI00007102.3	GLOD4	Uncharacterized protein C17orf25	119	138	C	UR	30828.6	47653.3	41186.6	35414.4	35135.9	41863.4
IPI:IPI00009790.1	PFKP	6-phosphofructokinase type C	120	318	C	UR	63213.8	81328.2	84488.6	78072.1	68426.9	80126.7
IPI:IPI00743142.2	PFKM	Isoform 1 of 6-phosphofructokinase, muscle type	120	154	C	UR	22963.7	46473.3	42669.1	35763.4	41100.3	46797.6
IPI:IPI00332371.9	PFKL	Isoform 1 of 6-phosphofructokinase, liver type	120	107	C	UR	35017.5	29506.6	26234.4	22846.9	21539.3	26899.2
IPI:IPI00217852.6	PM20D2	Peptidase M20 domain-containing protein 2	120	38	C	UR	9010.69	8610.27	11515.5	10599.7	9192.06	7014.71
IPI:IPI00154833.7	GFOD2	Isoform 1 of Glucose-fructose oxidoreductase domain-containing protein 2	120	3	C	UR	607.791	703.42	727.681	748.706	707.22	611.612
IPI:IPI00004502.2	GFOD1	Isoform 1 of Glucose-fructose oxidoreductase domain-containing protein 1	120	8	C	UR	3026.46	2947.99	2887.61	2443.02	2474.39	2332.67
IPI:IPI00019353.4	AGK	Isoform 1 of Acylglycerol kinase, mitochondrial	121	65	C	UR	14225.9	16363.9	17867.5	19157.5	23206.5	16197.9
IPI:IPI00032202.3	WDR37	cDNA FLJ76685, highly similar to Homo sapiens WD repeat domain 37 (WDR37), mRNA	122	13	C	UR	4810.88	4906.14	4994.79	5148.08	5782.99	5861.35
IPI:IPI00219198.2	UBE3A	Isoform III of Ubiquitin-protein ligase E3A	123	88	C	UR	25687	28413.2	27790.9	33346	33111	32596.6
IPI:IPI00306471.1	CCDC94	Coiled-coil domain-containing protein 94	123	54	C	UR	10136.2	10581.4	13206.3	12545.2	11741.6	12975.5
##IPI:IPI00011044.1	RP1	Oxygen-regulated protein 1	123	2	C	UR	1061.3	708.288	803.026	893.156	336.847	641.599
IPI:IPI00099131.1	ZC3H7B	Isoform 1 of Zinc finger CCCH domain-containing protein 7B	124	34	C	UR	8326.95	8392.34	10413.7	10240.7	9544.92	8676.73
IPI:IPI00027009.2	PACSIN2	Isoform 1 of Protein kinase C and casein kinase substrate in neurons protein 2	125	90	C	UR	32451.4	27090.5	21249.7	21662.5	19409.6	21122.7
IPI:IPI00221111.1	PACSIN2	Isoform 2 of Protein kinase C and casein kinase substrate in neurons protein 2	125	1	C	UR	165.762	255.215	162.501	172.432	272.624	318.343
IPI:IPI00011515.1	PACSIN1	Protein kinase C and casein kinase substrate in neurons protein 1	125	13	C	UR	8821.71	7764.31	5234.32	5475.78	4837.91	5488.54
IPI:IPI00337315.1	RBBP6	Isoform 1 of Retinoblastoma-binding protein 6	126	94	C	UR	28577.9	30232.8	32426.2	33141.3	34339.9	32280.4
IPI:IPI00037448.3	GRHPR	Glyoxylate reductase/hydroxypyruvate reductase	127	68	C	UR	18955.5	17766.5	16396.4	12256.4	15354.5	17668.1
IPI:IPI00011102.2	CSNK1D	Isoform 1 of Casein kinase I isoform delta	128	29	C	UR	8359.89	6079.53	6858.81	6727.24	7011.11	7539.41
IPI:IPI00027729.1	CSNK1E	Casein kinase I isoform epsilon	128	14	C	UR	2474.9	2717.53	3286.36	2818.3	3214.3	3350.38
IPI:IPI00303276.4	IFI44L	Isoform 1 of Interferon-induced protein 44-like	129	3	C	UR	216.317	293.925	327.121	348.462	538.772	986.785
IPI:IPI00021326.4	SHC1	SHC (Src homology 2 domain containing) transforming protein 1 isoform 3	130	42	C	UR	6182.74	8098.26	8613.72	8265.29	5585.11	6814.37
IPI:IPI00005743.1	ATXN7	Isoform a of Ataxin-7	131	6	C	UR	441.61	392.498	440.246	561.756	517.37	549.133
IPI:IPI00299063.2	STIM1	Stromal interaction molecule 1	132	48	C	UR	17276.8	14672.8	11936.6	13008.6	13026.7	13413.9
IPI:IPI00020508.1	TRMT1	Isoform 1 of N(2),N(2)-dimethylguanosine tRNA methyltransferase	133	46	C	UR	9377.64	8414.72	9959.67	10231.4	7612.86	7347.81
IPI:IPI00218648.2	ARID4A	Isoform III of AT-rich interactive domain-containing protein 4A	134	29	C	UR	8771.27	7297.77	9060.08	13531.3	12435.5	8621.24
IPI:IPI00794288.1	MX1	cDNA FLJ35689 fis, clone SPLEN2019379, highly similar to INTERFERON-REGULATED RESISTANCE GTP-BINDING PROTEIN MXA	134	102	C	UR	19011.4	17809.8	26504.6	60856.3	17996.2	22789.8
IPI:IPI00302917.5	ARID4B	Isoform 2 of AT-rich interactive domain-containing protein 4B	134	49	C	UR	12337.2	13437	12221.5	14568.6	15272.7	16979.8
IPI:IPI00024684.1	MX2	Interferon-induced GTP-binding protein Mx2	134	26	C	UR	4634.93	3429.68	5259.49	12374.4	3255.43	4225.04
IPI:IPI00010872.3	CBX4	CBX4 protein	135	19	C	UR	4827.81	4016.16	4471.09	5461.39	5221.63	5876.72
IPI:IPI00029081.3	LIG3	ligase III, DNA, ATP-dependent isoform alpha precursor	136	101	C	UR	30413.4	25357.1	21440.7	46952.3	45103.7	32428.9
IPI:IPI00184119.6	DNAJC6	Isoform 2 of Putative tyrosine-protein phosphatase auxilin	137	4	C	UR	2245.65	1907.55	1661.18	1267.7	1780.05	1989.56
IPI:IPI00018671.1	DUSP3	Dual specificity protein phosphatase 3	138	25	C	UR	7014.09	7199.98	7785.17	6140.35	5526.24	6766.92
IPI:IPI00642126.3	KIAA1618	Isoform 1 of Protein ALO17	139	173	C	UR	41861.5	39982	47708.5	58226.8	60379	43463.7
IPI:IPI00828098.1	RNF213	Isoform 1 of RING finger protein 213	139	13	C	UR	3506.74	3243.44	3723.81	4613.34	4750.36	3218.71
IPI:IPI00301263.2	CAD	CAD protein	139	498	C	UR	90600.5	98955.5	147329	129275	91643.3	100630
IPI:IPI00011062.1	CPS1	Isoform 1 of Carbamoyl-phosphate synthase [ammonia], mitochondrial	139	14	C	UR	3157.38	3439.21	5150.12	4606.88	3185.71	3510.3
IPI:IPI00024661.4	SEC24C	Protein transport protein Sec24C	139	130	C	UR	36305.7	29636.6	29237.1	29813.3	27290.8	29414.1
IPI:IPI00218288.6	SEC24D	Isoform 2 of Protein transport protein Sec24D	139	38	C	UR	8382.4	9130.87	13352.9	12971.5	10973	11062.5
IPI:IPI00218094.3	KIAA1618	Isoform 3 of Protein ALO17	139	75	C	UR	25797.3	23190.3	27055.4	33988.7	35134.3	24544.2
IPI:IPI00006906.3	C12orf4	Uncharacterized protein C12orf4	139	6	C	UR	1737.72	1383.08	1418.37	1428.63	1512.45	1604.13
IPI:IPI00029263.2	FER	Proto-oncogene tyrosine-protein kinase FER	139	18	C	UR	5779.25	4739.65	6006.26	6334.69	9392.14	10836.9
IPI:IPI00470446.2	ATG16L1	Isoform 1 of Autophagy-related protein 16-1	140	31	C	UR	7529.78	7055.06	7681.95	6048.48	5841.6	6785.86
IPI:IPI00031804.1	VDAC3	Isoform 1 of Voltage-dependent anion-selective channel protein 3	141	209	C	UR	36131.6	43057.6	46366.8	48322.8	59773.3	54355.2
IPI:IPI00216308.5	VDAC1	Voltage-dependent anion-selective channel protein 1	141	450	C	UR	108944	99150.1	103740	87535.9	100216	95070.5
IPI:IPI00024145.2	VDAC2	Isoform 2 of Voltage-dependent anion-selective channel protein 2	141	522	C	UR	119511	108675	116966	100195	96669.7	113628
IPI:IPI00024524.4	PNO1	RNA-binding protein PNO1	142	27	C	UR	6112.66	5557.56	7655.62	7982.02	7247.79	5987.4
IPI:IPI00465033.2	ZNF277	Zinc finger protein 277	142	3	C	UR	343.401	286.686	267.067	207.698	186.863	243.34
IPI:IPI00328443.1	C14orf159	Isoform 3 of UPF0317 protein C14orf159, mitochondrial	143	15	C	UR	2553.25	1950.64	3307.12	2759.77	3289.6	3640.97
IPI:IPI00007283.1	POLR2D	DNA-directed RNA polymerase II subunit RPB4	143	9	C	UR	1813.25	1942.27	2088.47	2150.49	2013.26	2511.21
IPI:IPI00016006.2	GPHN	Isoform 1 of Gephyrin	144	53	C	UR	14104.1	11676.8	11831	16068.7	17117.5	19196.5
IPI:IPI00013929.1	TCF3	Isoform E12 of Transcription factor E2-alpha	145	15	C	UR	3073.4	4562.3	5104.21	6545.67	4705.1	3407.6
IPI:IPI00012966.1	TCF12	Transcription factor 12	145	26	C	UR	2961.02	5649.5	9445.24	10440.9	8392.09	5673.38
IPI:IPI00013492.1	TCF4	Isoform SEF2-1B of Transcription factor 4	145	7	C	UR	1428.84	2136.23	2384.03	1752	2374.64	2185.39
IPI:IPI00005861.1	PRPF3	Isoform 1 of U4/U6 small nuclear ribonucleoprotein Prp3	146	100	C	UR	24118.3	26943.5	27990.3	30478.4	28445.2	26283.2
IPI:IPI00100160.3	CAND1	Isoform 1 of Cullin-associated NEDD8-dissociated protein 1	147	340	C	UR	80415.6	97734.3	81357.9	78013.7	102061	119500
IPI:IPI00791537.3	CAND2	Isoform 1 of Cullin-associated NEDD8-dissociated protein 2	147	13	C	UR	1814.36	2245.55	2748.81	2637.03	3308.71	3725.64
IPI:IPI00419957.2	ATP2C1	Isoform 1 of Calcium-transporting ATPase type 2C member 1	148	27	C	UR	12189.9	10277.6	11027.2	10252.8	10554.8	11592.8
IPI:IPI00170596.1	SIN3A	Paired amphipathic helix protein Sin3a	149	129	C	UR	29523.1	31673.9	31732.5	42624.2	39677.7	39346.2
IPI:IPI00464980.3	SIN3B	Isoform 1 of Paired amphipathic helix protein Sin3b	149	28	C	UR	8339.82	7580.18	7830.11	6788.95	6910.8	7836.48
IPI:IPI00029778.3	TP53BP1	Isoform 1 of Tumor suppressor p53-binding protein 1	150	185	C	UR	37156.5	49362.1	43817.6	44693.3	53817.8	57408.4
IPI:IPI00090720.4	QRSL1	Isoform 1 of Glutamyl-tRNA(Gln) amidotransferase subunit A homolog	151	31	C	UR	14253.5	10656.8	11101.4	9939.97	9399.55	9760.91
IPI:IPI00290032.1	TRPM7	Transient receptor potential cation channel subfamily M member 7	152	8	C	UR	1623.9	1462.59	1611.74	1554.68	1487	1855.89
IPI:IPI00022608.1	SORL1	Sortilin-related receptor	153	20	C	UR	8090.2	4887.78	4670.46	6267.17	8324.12	6612.51
IPI:IPI00396412.2	SRPK2	serine/arginine-rich protein-specific kinase 2 isoform a	154	67	C	UR	14422.7	14846.2	16301.6	25800.7	19166.1	15270.6
IPI:IPI00412344.5	SRPK1	Isoform 2 of Serine/threonine-protein kinase SRPK1	154	56	C	UR	12891.1	10884.9	11836.1	16051.2	14455.6	13695.4
IPI:IPI00015842.1	RCN1	Reticulocalbin-1	155	161	C	UR	52128.3	44780.9	55244.4	50811.2	26565.2	35087.3
IPI:IPI00396258.3	BCAT2	Isoform A of Branched-chain-amino-acid aminotransferase, mitochondrial	156	31	C	UR	7347.7	8881.27	9826.44	7508.63	9157.19	10223.5
IPI:IPI00002790.3	SEL1L	Isoform 1 of Protein sel-1 homolog 1	157	39	C	UR	11594.2	10132.1	12694.9	11774.1	13065.5	13326.7
IPI:IPI00014340.2	PPP1R12C	Isoform 1 of Protein phosphatase 1 regulatory subunit 12C	158	20	C	UR	6705.01	5298.54	4930.95	4211.03	4049.85	4058.08
IPI:IPI00879023.1	PPP1R12C	Isoform 4 of Protein phosphatase 1 regulatory subunit 12C	158	1	C	UR	59.557	36.51	43.2122	35.4153	35.2955	16.6344
IPI:IPI00031812.3	YBX1	Nuclease-sensitive element-binding protein 1	159	198	C	UR	27133.7	25984.2	30133.7	31654.4	28504.9	29898.8
IPI:IPI00250153.8	YBX2	Y-box-binding protein 2	159	11	C	UR	1920.48	1731.55	1274.68	989.293	2102.05	2536.72
IPI:IPI00031801.4	CSDA	Isoform 1 of DNA-binding protein A	159	252	C	UR	63204.6	57179.6	65582.9	64338.4	58824.2	63600.4
IPI:IPI00219147.4	CSDA	Isoform 2 of DNA-binding protein A	159	5	C	UR	2425.18	1623.55	1331.16	1737.79	2075.48	1765.91
IPI:IPI00396126.2	C5orf24	Isoform 1 of UPF0461 protein C5orf24	160	9	C	UR	1877.56	2466.75	2457.96	2071.09	2466.12	2613.58
IPI:IPI00031115.4	GOLGA1	Golgin subfamily A member 1	161	13	C	UR	6412.06	6987.63	8828.25	6758.94	6510.3	7514.73
IPI:IPI00465200.2	CEP57	Isoform 1 of Centrosomal protein of 57 kDa	161	6	C	UR	1095.98	1272.25	1374.56	1829.43	1828.32	1792.37
IPI:IPI00171224.4	CEP120	Isoform 2 of Centrosomal protein of 120 kDa	161	6	C	UR	1374.34	1358.72	1476.05	1412.59	1176.06	1415.64
IPI:IPI00401962.2	CCDC137	Coiled-coil domain-containing protein 137	162	23	C	UR	6204.2	5605.64	5750.79	6769.77	5422.85	5595.51
IPI:IPI00023191.5	TOM1	cDNA FLJ54710, highly similar to Target of Myb protein 1	163	26	C	UR	9950.64	6397.44	5092.58	4829.95	5568.28	5097.5
IPI:IPI00009504.2	SLC20A2	Sodium-dependent phosphate transporter 2	164	7	C	UR	2734.05	1831.31	2545.48	2177.45	2026.66	1480.34
IPI:IPI00023035.2	SLC20A1	Sodium-dependent phosphate transporter 1	164	4	C	UR	1852.27	1544.18	2492.2	2120.26	1981.57	1848.85
IPI:IPI00032358.4	POM121C	Nuclear envelope pore membrane protein POM 121C	165	34	C	UR	7837.2	7195.72	9174.59	9341.12	8985.19	8736.66
IPI:IPI00902533.1	POM121	Isoform 1 of Nuclear envelope pore membrane protein POM 121	165	3	C	UR	612.169	621.63	669.878	598.417	642.001	716.123
IPI:IPI00167941.1	MDN1	Midasin	166	220	C	UR	58217.2	73421.7	75959.2	58951.1	57793.2	60950.3
IPI:IPI00299024.9	BASP1	Brain acid soluble protein 1	167	127	C	UR	10813.4	54726.6	76054.3	64580.6	34671.1	35601.3
IPI:IPI00032050.4	WBP2	WW domain-binding protein 2	168	39	C	UR	19635.3	17033.6	10225.3	10942.7	11394.2	14205.1
IPI:IPI00165314.7	LOC100132129	hypothetical protein, partial	169	15	C	UR	4050.22	4503.42	4842.54	4289.76	3350.42	3924.84
IPI:IPI00021167.3	PRKRA	Isoform 1 of Interferon-inducible double stranded RNA-dependent protein kinase activator A	170	48	C	UR	13054.4	15244.7	14326.5	13394.6	15605.9	17827.4
IPI:IPI00182757.1	KIAA1967	Isoform 1 of Protein KIAA1967	171	227	C	UR	31647.3	37627.7	38012	48557.4	47291.3	41549.8
IPI:IPI00477962.3	UAP1L1	Isoform 1 of UDP-N-acetylhexosamine pyrophosphorylase-like protein 1	172	23	C	UR	5111.65	4493.84	4908.21	4750.21	8032.48	9595.87
IPI:IPI00000684.4	UAP1	Isoform AGX2 of UDP-N-acetylhexosamine pyrophosphorylase	172	86	C	UR	12536.5	32024.1	32892.4	30248.8	13192.9	14228.7
IPI:IPI00396370.6	EIF3B	Isoform 1 of Eukaryotic translation initiation factor 3 subunit B	173	241	C	UR	76693.8	64108	72246.3	62815.1	48295.8	56214.3
IPI:IPI00290337.8	EPS8	Epidermal growth factor receptor kinase substrate 8	174	23	C	UR	5743.23	6742.49	5944.5	4621.22	6372.6	7218.67
IPI:IPI00008868.3	MAP1B	Microtubule-associated protein 1B	175	374	C	UR	49648.4	149531	191348	161589	91440.4	105965
IPI:IPI00020356.4	MAP1A	331 kDa protein	175	196	C	UR	32173.3	71292	92964.4	72834.4	49648.6	38672.2
IPI:IPI00217018.2	SAMD9	Sterile alpha motif domain-containing protein 9	175	38	C	UR	10093.3	9724.3	11337	19335.9	17896.3	14059.4
IPI:IPI00719690.3	SAMD9L	Isoform 1 of Sterile alpha motif domain-containing protein 9-like	175	4	C	UR	1067.99	775.731	1018.13	1469.78	1647.42	1124.07
IPI:IPI00234368.1	ADK	Isoform Short of Adenosine kinase	176	89	C	UR	29337.1	24741.2	24338.6	26070.3	26117.1	24567.5
IPI:IPI00031479.1	PDIA5	Protein disulfide-isomerase A5	177	43	C	UR	12479.2	14287.9	15947.3	9830.29	10694.6	12540.9
IPI:IPI00552569.1	ERCC6L	DNA excision repair protein ERCC-6-like	178	59	C	UR	15466.2	14990.1	17077.3	19785.3	18727	19775.5
IPI:IPI00783999.3	NFKBIL2	Isoform 1 of NF-kappa-B inhibitor-like protein 2	179	25	C	UR	4176.49	4301.66	5214.87	4628.98	4977.36	4690.23
IPI:IPI00412977.1	-	Prothymosin alpha	180	95	C	UR	29494.4	40711.6	26030.5	58822.1	36545	24666.7
IPI:IPI00748244.1	SPAG9	Isoform 7 of C-jun-amino-terminal kinase-interacting protein 4	180	1	C	UR	304.133	147.055	173.321	291.845	141.417	210.173
IPI:IPI00737372.1	LOC643287	similar to prothymosin alpha	180	5	C	UR	798.202	1213.04	1215.21	1620.26	1401.14	1156.76
IPI:IPI00744648.1	SPAG9	Isoform 1 of C-jun-amino-terminal kinase-interacting protein 4	180	126	C	UR	32271.4	41884	47874.7	42201.8	33936.1	38938
IPI:IPI00384653.1	PTMA;PTMAP5	Prothymosin a14	180	6	C	UR	1604.01	1645.71	1401.51	2244.01	1477.37	1173.28
IPI:IPI00883655.1	-	Dihydropyrimidinase-like 2 long form (Fragment)	181	34	C	UR	3982.42	9504.88	13314.4	11679.5	8356.49	8337.63
IPI:IPI00029111.3	DPYSL3	Collapsin response mediator protein 4 long variant	181	273	C	UR	33661.9	59817.7	68997.3	56964	107617	132303
IPI:IPI00414123.4	CRMP1	Dihydropyrimidinase-related protein 1	181	45	C	UR	6356.89	7238.26	14938.7	12768.6	16943.8	18821.8
IPI:IPI00106642.4	SDF2L1	Dihydropyrimidinase-like 2	181	208	C	UR	23907.9	51648.5	65320.2	55098.2	33008.3	38911.5
IPI:IPI00257508.4	DPYSL2	Dihydropyrimidinase-related protein 2	181	112	C	UR	13244.1	29914.9	37363.6	31766.5	18080.5	22290.5
IPI:IPI00260090.3	ELMO2	cDNA FLJ60834, highly similar to Engulfment and cell motility protein 2	181	48	C	UR	8667.38	12024.7	12815.5	16340.1	17207.7	13705.6
IPI:IPI00219532.1	ELMO1	Isoform 1 of Engulfment and cell motility protein 1	181	43	C	UR	7273.66	7479.63	8480.09	29167.4	29421.5	10139.2
IPI:IPI00028910.1	DPYS	Dihydropyrimidinase	181	6	C	UR	1521.56	1718.84	1938.98	1665.73	3750.82	4858.83
IPI:IPI00031982.1	NCKAP1	Isoform 1 of Nck-associated protein 1	182	120	C	UR	35768.1	37670.9	37023.2	28844.9	31080.1	37424.6
IPI:IPI00023407.4	NCKAP1L	Nck-associated protein 1-like	182	42	C	UR	7316.21	8142.87	10503.7	24555.5	21479.6	7867.67
IPI:IPI00018879.2	IDUA	Alpha-L-iduronidase	183	2	C	UR	1304.62	1011.02	1000.58	1376.57	1522.32	1410.47
IPI:IPI00300060.4	WDR70	WD repeat-containing protein 70	184	66	C	UR	18091.4	18795.1	19404.8	22533.5	21658.5	20592.5
IPI:IPI00305887.1	NUF2	Kinetochore protein Nuf2	185	41	C	UR	12636.5	14021.5	15109.5	12755.2	14770.2	16280.5
IPI:IPI00032138.4	POFUT2	Isoform A of GDP-fucose protein O-fucosyltransferase 2	185	11	C	UR	2624.44	2754.69	3167.92	2479.69	2491.53	3225.29
IPI:IPI00216138.6	TAGLN	Transgelin	186	9	C	UR	1912.02	3355.1	5496.77	3781.59	1841.23	2393.29
IPI:IPI00006176.3	HGS	Isoform 1 of Hepatocyte growth factor-regulated tyrosine kinase substrate	187	82	C	UR	22197.2	23267.3	23543.6	21589.5	18966.3	23234.9
IPI:IPI00216393.1	CLTA	Isoform Non-brain of Clathrin light chain A	188	75	C	UR	16762.5	20906.8	21119.5	17825.9	19855.3	22911.8
IPI:IPI00151990.3	TXNDC15	Isoform 1 of Thioredoxin domain-containing protein 15	189	2	C	UR	311.962	270.222	313.588	250.886	316.062	381.874
IPI:IPI00550020.3	PTMS	Parathymosin	190	132	C	UR	14224.6	45662.6	33291	25335.4	34451.1	36230
IPI:IPI00007605.1	NXT1	NTF2-related export protein 1	191	14	C	UR	2619.24	2763.03	3053.61	3874.03	3737.74	3350.26
IPI:IPI00218342.1	MTHFD1	C-1-tetrahydrofolate synthase, cytoplasmic	192	398	C	UR	77365.2	96036.5	113328	115583	116875	102170
IPI:IPI00794900.3	MTHFD1	cDNA FLJ56016, highly similar to C-1-tetrahydrofolate synthase, cytoplasmic	192	3	C	UR	977.631	5647.53	5351.02	912.806	827.933	823.318
IPI:IPI00291646.3	MTHFD1L	Methylenetetrahydrofolate dehydrogenase (NADP+ dependent) 1-like	192	96	C	UR	27743.8	23088.7	27326.3	30137.8	27877.9	25236.1
IPI:IPI00246058.9	PDCD6IP	PDCD6IP protein	193	209	C	UR	58701.9	44817.9	62612.7	60862.8	58524.4	60470.4
IPI:IPI00172580.4	NUP54	Nucleoporin 54kDa variant (Fragment)	193	72	C	UR	14749.3	15215.8	16963.4	19932.7	20896.2	18727.7
IPI:IPI00924996.1	PDCD6IP	11 kDa protein	193	10	C	UR	3235.69	2310.78	3337.96	2853.48	2956.43	3296.73
IPI:IPI00105518.5	MARCH6	Isoform 1 of E3 ubiquitin-protein ligase MARCH6	194	3	C	UR	734.625	435.536	675.962	763.796	504.257	371.578
IPI:IPI00329236.3	PRKCD	Protein kinase C delta type	195	25	C	UR	13762.3	10934.5	6277.91	5679.61	8710.89	10421.3
IPI:IPI00219628.3	PRKCB	Isoform Beta-II of Protein kinase C beta type	195	64	C	UR	8918.78	21674.4	29003.4	25480.8	16712.4	9586.07
IPI:IPI00029196.6	PRKCQ	Isoform 1 of Protein kinase C theta type	195	19	C	UR	3845.67	3377.39	3633.85	11698.3	9347.59	5690.81
IPI:IPI00385449.4	PRKCA	Protein kinase C alpha type	195	47	C	UR	6573.54	5724.01	10413	18938.2	20585	10121.2
IPI:IPI00914043.1	PRKCH	protein kinase C, eta	195	16	C	UR	4734.56	3832.93	4207.31	9645.61	10470.7	4773.06
IPI:IPI00299095.2	SNX2	Sorting nexin-2	195	112	C	UR	40721.9	37396.5	34722.2	30868	38491.6	44766.7
IPI:IPI00183530.2	SNX1	cDNA FLJ46302 fis, clone TESTI4036048, highly similar to Sorting nexin 1	195	13	C	UR	3373.85	3784.2	4018.37	5236.4	5319.21	3542.64
IPI:IPI00328753.1	KTN1	Isoform 1 of Kinectin	195	408	C	UR	124907	108489	137953	110183	113746	134319
IPI:IPI00641829.5	BAT1	Isoform 2 of Spliceosome RNA helicase BAT1	195	250	C	UR	56376.1	58900.3	64125.4	59144.8	64259	73162.2
IPI:IPI00644431.2	DDX39	cDNA FLJ55484, highly similar to ATP-dependent RNA helicase DDX39	195	84	C	UR	20865.5	18855.2	18718.5	25346.6	23244.5	21124.4
IPI:IPI00183274.3	SNX1	sorting nexin 1 isoform c	195	89	C	UR	23056.5	24306.4	25466.5	33122.2	33452.9	25523.5
IPI:IPI00022649.3	SLC12A2	Isoform 1 of Solute carrier family 12 member 2	195	55	C	UR	32619.2	22042.1	8930.95	11939.9	10955.4	9354.53
IPI:IPI00307155.7	ROCK2	Rho-associated protein kinase 2	195	127	C	UR	51818.1	39661.4	40597.7	33459.7	36652.6	40256.7
IPI:IPI00894264.1	ROCK2	Putative uncharacterized protein ROCK2	195	1	C	UR	53.2805	61.2314	54.4508	27.2558	7.14437	11.3905
IPI:IPI00022542.1	ROCK1	Rho-associated protein kinase 1	195	105	C	UR	39489.8	29585.5	29136.9	30849.7	35248.4	40709.4
IPI:IPI00219420.3	SMC3	Structural maintenance of chromosomes protein 3	195	325	C	UR	80219.4	80857.4	92803.5	124696	121713	107228
IPI:IPI00024539.1	PRKCE	Protein kinase C epsilon type	195	11	C	UR	3024.12	3600.61	4568.29	4646.63	4090.19	3393.99
IPI:IPI00019941.1	C20orf29	Uncharacterized protein C20orf29	195	5	C	UR	843.725	771.541	934.631	1047.52	1051.45	1111.88
IPI:IPI00456887.2	HNRNPUL2	Heterogeneous nuclear ribonucleoprotein U-like protein 2	196	326	C	UR	92549.8	84259.9	81094.6	82895.1	79364.8	77577.2
IPI:IPI00431082.3	HAUS1	Isoform 1 of Coiled-coil domain-containing protein 5	197	15	C	UR	4420.3	4515.89	5179.46	4935.95	6114.75	6502.59
IPI:IPI00008918.1	LIMA1	Isoform Beta of LIM domain and actin-binding protein 1	198	180	C	UR	57000.3	59664.7	60372	53309.5	56716.1	60202.6
IPI:IPI00883896.1	LIMA1	LIM domain and actin binding 1 isoform a	198	3	C	UR	786.32	930.626	1094.48	1057.75	1181.31	956.095
IPI:IPI00549972.3	LIMD2	LIM domain-containing protein 2	198	4	C	UR	535.03	1705.29	1993.17	1701.02	1385.31	1192.38
IPI:IPI00018370.3	SVIL	Isoform 2 of Supervillin	199	67	C	UR	26052.3	22130.9	20982.7	19842.6	21537.4	25145.8
IPI:IPI00154614.4	ZCRB1	Zinc finger CCHC-type and RNA-binding motif-containing protein 1	200	7	C	UR	2033.43	2800.91	2575	2387.31	2794.59	3581.98
IPI:IPI00107282.5	PHF10	PHD finger protein 10 isoform a	201	25	C	UR	4632.92	5418.56	5418.33	6145.65	6316.17	6650.79
IPI:IPI00550272.3	INTS10	Integrator complex subunit 10	202	19	C	UR	7041.69	6610.89	6973.59	6839.76	7529.44	8012.06
IPI:IPI00304187.8	RBM28	RNA-binding protein 28	203	97	C	UR	29866.5	32799.3	33789.7	40230.9	34620.6	22145.1
IPI:IPI00012772.8	RPL8	60S ribosomal protein L8	203	160	C	UR	33923.4	33572.8	37134.1	38361.2	34279.6	33149.1
IPI:IPI00249304.3	PRIC285	Isoform 1 of Peroxisomal proliferator-activated receptor A-interacting complex 285 kDa protein	204	61	C	UR	10096.6	9716.25	15375.5	19212.9	9073.36	11301.1
IPI:IPI00383798.3	PRODH	Isoform 4 of Proline dehydrogenase, mitochondrial	205	10	C	UR	4251.33	3288.69	1604.01	1630.71	1940.3	2387.2
IPI:IPI00217669.1	LIG4	DNA ligase 4	206	29	C	UR	10108.6	8481.61	8649.3	12290	12600	10922.7
IPI:IPI00018798.3	DNAJC17	DnaJ homolog subfamily C member 17	207	24	C	UR	4033.66	3526.89	3757.26	4164.17	4030.01	4961.69
IPI:IPI00005129.8	SCAMP1	Isoform 1 of Secretory carrier-associated membrane protein 1	208	20	C	UR	4954.02	4792.19	5325.13	4873.67	5537.98	6232
IPI:IPI00006052.3	PFDN2	Prefoldin subunit 2	209	53	C	UR	10819.5	12880.2	13218.6	13347.6	13087.2	13536.1
IPI:IPI00305068.5	PRPF6	Pre-mRNA-processing factor 6	210	170	C	UR	41248.1	44257.9	46212.3	47906.3	48954.5	52967.4
IPI:IPI00465261.2	ERAP2	Isoform 1 of Endoplasmic reticulum aminopeptidase 2	211	93	C	UR	12013.9	12375.7	13067.1	50350	61836.1	24299
IPI:IPI00008436.4	POLE4	DNA polymerase epsilon subunit 4	212	7	C	UR	1186.22	1496.59	1728.13	1907.27	2459.48	1691.76
IPI:IPI00016862.1	GSR	Isoform Mitochondrial of Glutathione reductase, mitochondrial	213	155	C	UR	32417.8	34733.8	38540.3	35318.4	31164.7	34446.3
IPI:IPI00183110.7	ZIM2;PEG3AS;PEG3	Isoform 1 of Paternally-expressed gene 3 protein	213	57	C	UR	10030.8	17882	26933.7	30339.5	9997.74	10533.4
IPI:IPI00025803.3	INSR	Insulin receptor precursor	213	11	C	UR	5249.16	4573.73	4196.19	3321.91	4893.87	5932.97
IPI:IPI00027232.3	IGF1R	Insulin-like growth factor 1 receptor	213	2	C	UR	560.131	549.6	480.257	369.67	333.911	348.593
IPI:IPI00017334.1	PHB	Prohibitin	214	154	C	UR	26658.9	37940.9	50636.7	30426.8	36390.3	36830.9
IPI:IPI00072541.4	PCID2	Isoform 3 of PCI domain-containing protein 2	215	36	C	UR	11183.4	9557	12111.2	13696.4	12647	13725.1
IPI:IPI00306049.6	MSTO1	Isoform 1 of Protein misato homolog 1	216	16	C	UR	5123.74	5895.15	5924.93	4911.83	5661.1	6276.3
IPI:IPI00307114.2	SCAPER	S-phase cyclin A-associated protein in the ER isoform a	217	16	C	UR	3165.06	2761.24	2957.11	3113.71	4157.54	4280.23
IPI:IPI00411614.1	WDHD1	WD repeat and HMG-box DNA-binding protein 1	218	160	C	UR	29857.5	41286.8	50633.2	61179.8	52223.8	51358.4
IPI:IPI00029174.3	TGIF2	Homeobox protein TGIF2	219	5	C	UR	1280.21	1719.03	1618.94	1654.74	1728.41	1670.39
IPI:IPI00297138.2	TGIF1	Isoform 1 of Homeobox protein TGIF1	219	3	C	UR	730.602	696.924	612.421	553.718	420.232	473.849
IPI:IPI00019148.1	IGBP1	Immunoglobulin-binding protein 1	220	43	C	UR	12861	9929.63	9445.07	9030.39	8547.19	8995.15
IPI:IPI00304198.7	SLC7A6OS	Protein SLC7A6OS	221	5	C	UR	397.414	353.026	396.899	396.138	376.616	427.953
IPI:IPI00301618.6	SDCCAG1	Isoform 1 of Serologically defined colon cancer antigen 1	222	66	C	UR	26937.6	22790.6	25739.9	22825.9	23185.4	25724.9
IPI:IPI00915260.1	CCNK	Isoform 1 of Cyclin-K	223	19	C	UR	4026.1	3922.39	4580.42	5611.51	5980.68	5130.41
IPI:IPI00304589.4	TNKS1BP1	Isoform 1 of 182 kDa tankyrase-1-binding protein	224	221	C	UR	107857	76048.7	58565.8	51724.3	35123.7	39605.9
IPI:IPI00303214.5	TYSND1	Isoform 1 of Peroxisomal leader peptide-processing protease	225	15	C	UR	3664.87	3168.61	3432.57	2850.33	2675.37	3403.15
IPI:IPI00784614.1	SEPT9	septin 9 isoform a	226	230	C	UR	58742.2	50440	49656.3	52055.9	49494.2	44600.9
IPI:IPI00017504.2	C9orf40	Uncharacterized protein C9orf40	227	9	C	UR	1952.51	2124.09	2180.54	3022.12	2253.6	2220.68
IPI:IPI00657642.1	CCDC75	Isoform 1 of Coiled-coil domain-containing protein 75	228	17	C	UR	5003.65	5059.15	5442.1	6787.69	6315.8	5424.31
IPI:IPI00470455.1	APBB2	Isoform 1 of Amyloid beta A4 precursor protein-binding family B member 2	229	3	C	UR	488.821	375.155	408.359	431.802	533.399	571.352
IPI:IPI00024579.1	RAD18	E3 ubiquitin-protein ligase RAD18	230	23	C	UR	5265.43	5360.48	6494.95	12442.3	12787.7	7303.33
IPI:IPI00008708.5	RSL1D1	Ribosomal L1 domain-containing protein 1	231	144	C	UR	38048.6	52687.8	53131.9	48478.5	41960.9	28352.9
IPI:IPI00102670.5	FNBP1	Isoform 2 of Formin-binding protein 1	232	122	C	UR	18320.6	29469.8	41948.7	53691.9	61188.3	21976
IPI:IPI00642107.6	FNBP1	Formin binding protein 1	232	3	C	UR	956.341	978.5	1041.51	1141.23	1088.56	1034.02
IPI:IPI00031420.3	UGDH	UDP-glucose 6-dehydrogenase	233	95	C	UR	16768.9	20236.7	28134.5	30271.6	25037.6	33096.3
IPI:IPI00182164.7	FCHO1	Isoform 1 of FCH domain only protein 1	233	10	C	UR	1865.49	1423.41	1470.14	3006.29	2889.58	2307.29
IPI:IPI00472794.6	FCHO2	Isoform 1 of FCH domain only protein 2	233	7	C	UR	2229.39	1681.24	1409.08	783.677	2241.39	2620.51
IPI:IPI00220219.6	COPB2	Coatomer subunit beta'	234	210	C	UR	71383.5	62156.6	69322	60611.5	61762.8	63006.6
IPI:IPI00024650.1	SLC16A1	Monocarboxylate transporter 1	235	23	C	UR	3804.24	10746.2	9292.03	7389.93	6385.21	5864.52
IPI:IPI00910164.1	SLC16A1	cDNA FLJ53381, highly similar to Monocarboxylate transporter 1	235	3	C	UR	620.481	3252.04	1364.45	2800.8	986.667	770.041
IPI:IPI00396634.3	CTA-221G9.4	Isoform 1 of Uncharacterized protein KIAA1671	236	19	C	UR	4664.77	3913.3	3617.37	2887.35	3417.03	3585.23
IPI:IPI00465428.2	VPS13C	Isoform 1 of Vacuolar protein sorting-associated protein 13C	237	144	C	UR	45894.5	38188	44924.5	43242.3	48962.3	57961.6
IPI:IPI00000425.2	ATP6V0A2	V-type proton ATPase 116 kDa subunit a isoform 2	238	28	C	UR	6452.57	6022.22	8347.53	8145.93	7434.98	6058.14
IPI:IPI00023064.1	NDUFAF4	Protein HRPAP20	239	22	C	UR	7745.57	7652.87	8829.81	6313.01	7688.76	8309.39
IPI:IPI00005011.1	CNOT2	Isoform 1 of CCR4-NOT transcription complex subunit 2	240	39	C	UR	8225.47	10438.3	9112.64	12018	9233.79	8820.33
IPI:IPI00550638.2	POLR1E	Isoform 2 of DNA-directed RNA polymerase I subunit RPA49	241	38	C	UR	10969.8	10009.1	12656.8	12337.8	11308.9	9327.6
IPI:IPI00216992.5	RC3H1	Ring finger and CCCH-type zinc finger domains 1	242	12	C	UR	2614.99	2510.32	2533.52	2524.59	2935.05	3268.89
IPI:IPI00177819.5	RC3H2	Isoform 1 of Ring finger and CCCH-type zinc finger domain-containing protein 2	242	11	C	UR	3231.83	2882.48	3286.38	2980.48	3086.06	3442.96
IPI:IPI00008240.2	MARS	Methionyl-tRNA synthetase, cytoplasmic	243	210	C	UR	64966.5	53219.9	47857.2	46686.8	40023.7	42433.7
IPI:IPI00182833.7	CCHCR1	Coiled-coil alpha-helical rod protein 1	244	3	C	UR	474.337	400.493	337.693	341.279	321.958	336.326
IPI:IPI00411559.2	SMC4	Isoform 1 of Structural maintenance of chromosomes protein 4	245	324	C	UR	77417.1	99384.2	99776.3	85236.6	90307	103652
IPI:IPI00456149.2	GALNT12	Isoform 1 of Polypeptide N-acetylgalactosaminyltransferase 12	246	4	C	UR	803.889	776.224	880.324	873.525	1897.14	2141.44
IPI:IPI00004669.1	GALNT2	Polypeptide N-acetylgalactosaminyltransferase 2	247	84	C	UR	17751.3	18139.2	23045.8	25946.1	28328.9	18433.8
IPI:IPI00339297.1	GALNT4	Polypeptide N-acetylgalactosaminyltransferase 4	247	12	C	UR	3195.61	6908.3	7804.31	4776.18	2779.22	3408.13
IPI:IPI00018188.3	NECAP2	Isoform 1 of Adaptin ear-binding coat-associated protein 2	248	44	C	UR	9782.96	13078.7	12654	12279.6	11224.4	11724.3
IPI:IPI00170916.1	NECAP1	Isoform 1 of Adaptin ear-binding coat-associated protein 1	248	18	C	UR	3208.49	3786.72	3742.84	3397.79	3303.13	3561.18
IPI:IPI00031023.1	FLII	Protein flightless-1 homolog	249	132	C	UR	52243.8	39762.3	39576.1	37878.4	39534.9	34954.7
IPI:IPI00479065.3	GPSM1	G-protein signaling modulator 1 (AGS3-like, C. elegans) isoform a	250	31	C	UR	3868.48	8106.32	7453.58	4570.16	5134.14	5737.76
IPI:IPI00328379.4	GPSM2	LGN protein	250	11	C	UR	2819.73	3903.07	3547.26	2963.81	3193.87	3505.59
IPI:IPI00013488.4	CHN1	Isoform Alpha-2 of N-chimaerin	251	24	C	UR	5916.6	10559.7	9783.09	8219.35	8725.98	9695.88
IPI:IPI00428671.3	CHN2	cDNA FLJ59490, highly similar to Beta-chimaerin	251	11	C	UR	2321.79	2213.06	4458.1	3721.46	2122.44	2425.44
IPI:IPI00016820.1	SNX15	Isoform 1 of Sorting nexin-15	252	23	C	UR	6488.84	5856.94	6684.02	6026.81	5690.76	5418.12
IPI:IPI00069084.2	TRRAP	Isoform 1 of Transformation/transcription domain-associated protein	253	122	C	UR	29889.9	30352.3	32807.8	40299.7	43043.6	44599.4
IPI:IPI00060031.3	ARL8A	ADP-ribosylation factor-like protein 8A	253	15	C	UR	4345.53	4758.79	4962.37	2796.25	5769.77	6588.43
IPI:IPI00018871.2	ARL8B	cDNA FLJ56285, highly similar to ADP-ribosylation factor-like protein 8B	253	34	C	UR	8783	8991.77	10073.9	10075.7	11040.3	12935.2
IPI:IPI00015954.1	SAR1A	GTP-binding protein SAR1a	253	32	C	UR	8233.67	9669.25	11461.5	8144.84	8305.28	7994.06
IPI:IPI00002149.1	SAR1B	GTP-binding protein SAR1b	253	9	C	UR	1842.01	1624.58	1592.46	1461.02	1647.37	1245.88
IPI:IPI00300805.4	LRSAM1	Isoform 1 of E3 ubiquitin-protein ligase LRSAM1	254	39	C	UR	8317.99	10700.2	10272	8685.89	8737.77	9891.22
IPI:IPI00013272.1	GOLGA4	Isoform 1 of Golgin subfamily A member 4	255	126	C	UR	46838	36155.9	51885.5	41360.3	39973.9	43998.2
IPI:IPI00220521.2	GOLGA4	GOLGA4 protein	255	1	C	UR	94.0809	65.0288	108.587	78.5373	77.099	78.2817
IPI:IPI00025442.2	PLEKHG4	Isoform 1 of Puratrophin-1	255	5	C	UR	1135.65	1045.05	1103.65	1199.58	1249.73	1279.93
IPI:IPI00655762.1	GOLGA4	Antigen MU-RMS-40.18 (Fragment)	255	1	C	UR	330.447	304.523	384.241	625.871	769.219	402.795
IPI:IPI00056357.3	C19orf10	UPF0556 protein C19orf10	256	42	C	UR	14878.1	15647.2	18510.2	13582.8	13193.6	15066.5
IPI:IPI00032038.4	CPT1A	Isoform 1 of Carnitine O-palmitoyltransferase 1, liver isoform	257	89	C	UR	29876.4	29993.4	33698.8	16131.8	18681.4	23667.6
IPI:IPI00217240.1	WDR75	WD repeat-containing protein 75	258	55	C	UR	14945	13664.6	15137.6	15245.6	16193.8	13578.7
IPI:IPI00010882.3	DFFA	Isoform DFF45 of DNA fragmentation factor subunit alpha (Fragment)	259	56	C	UR	10911.3	15746.5	12211.9	11947.3	9944.74	10880.2
IPI:IPI00604566.3	DFFA	Isoform DFF35 of DNA fragmentation factor subunit alpha (Fragment)	259	2	C	UR	394.038	402.402	444.857	416.531	386.746	611.335
IPI:IPI00217143.3	SDHA	57 kDa protein	260	143	C	UR	36952.1	30859.1	32022.5	23278	26499.8	29004.2
IPI:IPI00305166.2	SDHA	cDNA FLJ61478, highly similar to Succinate dehydrogenase (ubiquinone) flavoprotein subunit, mitochondrial	260	27	C	UR	6383.72	5916.19	6354.9	4713.23	5079.11	5355.03
IPI:IPI00879322.1	SDHA	SDHA protein	260	1	C	UR	385.006	348.246	434.517	302.3	1211.3	1397.31
IPI:IPI00023673.1	LGALS3BP	Galectin-3-binding protein	261	81	C	UR	25760.2	20704.5	13537.1	18291.1	22060.7	14322.7
IPI:IPI00028068.3	SLC25A19	Mitochondrial thiamine pyrophosphate carrier	262	26	C	UR	9877.65	8241.76	9258.69	8043.71	8349.42	8859
IPI:IPI00307659.2	CBX8	Chromobox protein homolog 8	263	37	C	UR	9993.75	13752	12984.5	11788.8	11835.5	12550
IPI:IPI00291200.2	NUP133	Nuclear pore complex protein Nup133	264	142	C	UR	39465.7	39828.6	42834.6	40744.8	44704.2	44964.6
IPI:IPI00478741.2	TDRD7	Tudor domain-containing protein 7	264	36	C	UR	12798.6	9814.81	10541.8	9494.26	11170.4	12907.5
IPI:IPI00219018.7	GAPDH	Glyceraldehyde-3-phosphate dehydrogenase	265	1769	C	UR	264925	337533	327573	299869	309032	330756
IPI:IPI00007927.4	SMC2	Isoform 1 of Structural maintenance of chromosomes protein 2	265	346	C	UR	89902	114639	116119	111712	122065	116393
IPI:IPI00747283.4	MAPT	Isoform PNS-tau of Microtubule-associated protein tau	266	13	C	UR	1370.38	4862.61	3474.01	1304.17	1404.44	1959.8
IPI:IPI00921536.1	-	High molecular weight microtubule-associated protein tau (Fragment)	266	2	C	UR	793.479	2981.23	1768.34	736.702	637.213	763.928
IPI:IPI00220171.5	MAPT	Isoform Fetal-tau of Microtubule-associated protein tau	266	52	C	UR	7177.39	40854.4	31457.4	6834.2	6931.23	7719.59
IPI:IPI00220173.2	MAPT	Isoform Tau-B of Microtubule-associated protein tau	266	7	C	UR	480.36	2915.78	1741.98	582.038	541.833	551.166
IPI:IPI00151710.8	ANO6	Anoctamin-6	267	13	C	UR	3562.65	4647.66	5747.29	5613.77	3928.6	2055.15
IPI:IPI00181702.3	SFRS15	Isoform 1 of Splicing factor, arginine/serine-rich 15	268	75	C	UR	13871.5	12936.8	13129.8	16760.2	14919.2	17004.4
IPI:IPI00829652.1	RBM16	Putative RNA-binding protein 16	268	49	C	UR	13014.5	13303.6	13515.9	17811.1	14847.1	13932.8
IPI:IPI00855763.1	PALLD	Isoform 3 of Palladin	269	83	C	UR	25121.1	22044.5	23762.7	20795.2	23716.6	25619.5
IPI:IPI00015773.3	COMMD3	COMM domain-containing protein 3	270	29	C	UR	4723.75	5313.69	5704.19	6028.23	6555.42	5807.67
IPI:IPI00409671.3	DDX42	Isoform 1 of ATP-dependent RNA helicase DDX42	271	173	C	UR	37257.7	41289.4	40463.1	43907.2	41534.3	43734
IPI:IPI00883647.1	IK	RED protein	272	117	C	UR	27654.3	30576.9	30543.3	35575.2	31184.8	28629.3
IPI:IPI00549408.1	TMEM208	Isoform 1 of Transmembrane protein 208	273	1	C	UR	167.713	136.335	166.677	163.954	193.511	138.688
IPI:IPI00795918.1	NCAM1	Isoform 1 of Neural cell adhesion molecule 1	274	49	C	UR	12234.8	9984.27	8044.59	6386.68	41575.7	31463.8
IPI:IPI00004363.1	STK39	STE20/SPS1-related proline-alanine-rich protein kinase	275	49	C	UR	8485.72	11227.6	10337.2	16410.9	13587	12422
IPI:IPI00010080.2	OXSR1	Serine/threonine-protein kinase OSR1	275	62	C	UR	11680.3	11205.9	11716.6	19574.4	18311.5	14887.2
IPI:IPI00304693.6	AGFG1	Isoform 2 of Arf-GAP domain and FG repeats-containing protein 1	275	54	C	UR	14740.5	18986.3	16231.2	13767.5	11449.4	12084.9
IPI:IPI00418238.1	AGFG2	Isoform 1 of Arf-GAP domain and FG repeats-containing protein 2	275	8	C	UR	2263.26	1900.72	1685.3	1771.64	1677.47	1557.42
IPI:IPI00060627.2	CCDC124	Coiled-coil domain-containing protein 124	276	64	C	UR	23092.7	16394.9	16530.4	22898.8	17825.3	16824.8
IPI:IPI00038378.5	ENOPH1	Isoform 1 of Enolase-phosphatase E1	277	50	C	UR	9666.3	10080.4	8457.99	12444	10866.4	11901.6
IPI:IPI00106491.3	MRTO4	mRNA turnover protein 4 homolog	278	85	C	UR	20309.1	30236.2	32912.7	29434.3	26882.8	21650.5
IPI:IPI00292020.3	SRM	Spermidine synthase	279	78	C	UR	11598.3	20680.6	23160.6	18732.7	18624	12479.2
IPI:IPI00215995.1	ITGA3	Isoform Alpha-3A of Integrin alpha-3	280	4	C	UR	1673.96	1126.05	531.273	645.221	1425.02	1666.66
IPI:IPI00242273.4	SMARCD2	SWI/SNF-related matrix-associated actin-dependent regulator of chromatin d2 isoform 2	281	43	C	UR	8602.3	8689.79	8492.54	10026.2	10303.7	11935.4
IPI:IPI00062599.3	-	71 kDa protein	281	73	C	UR	11995.8	16450.8	18336.8	18576.9	18365.8	15645.9
IPI:IPI00106988.1	SMARCD3	Isoform 2 of SWI/SNF-related matrix-associated actin-dependent regulator of chromatin subfamily D member 3	281	7	C	UR	1040.95	1312.58	1336.41	1177.81	1456.06	1662.88
IPI:IPI00062511.5	C19orf20	Isoform 1 of Tubulin polyglutamylase complex subunit 1	282	2	C	UR	508.365	598.358	730.89	510.448	789.113	1110.5
IPI:IPI00917671.1	WDR81	212 kDa protein	283	18	C	UR	4153.03	3912.12	3718.95	3214.93	3980.88	5053.18
IPI:IPI00001632.4	KIAA1522	hypothetical protein LOC57648	284	25	C	UR	10069.4	6600.31	3768.1	3341.05	5738.6	5962.04
IPI:IPI00019276.1	UBXN6	Isoform 1 of UBX domain-containing protein 6	285	30	C	UR	9555.29	7696.6	9506.63	8213.8	9508.3	10052.3
IPI:IPI00217468.3	HIST1H1B	Histone H1.5	286	225	C	UR	44458.4	54653.7	60352.4	107402	125585	56774.9
IPI:IPI00217465.5	HIST1H1C	Histone H1.2	286	364	C	UR	82833.4	106861	105669	146566	162832	114806
IPI:IPI00217467.3	HIST1H1E	Histone H1.4	286	31	C	UR	5862.09	8847.33	9632.36	7616.15	11540	10284.7
IPI:IPI00217466.3	HIST1H1D	Histone H1.3	286	29	C	UR	6119.7	12052.8	11669.7	15378.6	16927.1	3461.83
IPI:IPI00217469.3	HIST1H1A	Histone H1.1	286	14	C	UR	9361.48	6795.44	13388.2	4948.41	1534.82	1995.57
IPI:IPI00419983.3	HIST1H1T	Histone H1t	286	16	C	UR	1904.74	1395.58	1597.62	1481.91	7540.43	7515.12
IPI:IPI00006682.1	PPP1R3D	Protein phosphatase 1 regulatory subunit 3D	287	4	C	UR	2166.93	1781.8	1288.89	1201.45	1038.47	1259.81
IPI:IPI00465128.4	BAT3	Isoform 1 of Large proline-rich protein BAT3	288	131	C	UR	29826.7	24606.9	21428.8	19665.6	21742.9	25211.9
IPI:IPI00790683.1	BAT3	HLA-B associated transcript 3	288	1	C	UR	223.86	195.502	227.902	294.549	208.163	232.909
IPI:IPI00005038.1	HRSP12	Ribonuclease UK114	289	41	C	UR	9876.71	17329.7	16240.9	12404.1	8661.19	10037.8
IPI:IPI00551024.4	DAK	Bifunctional ATP-dependent dihydroxyacetone kinase/FAD-AMP lyase (cyclizing)	290	82	C	UR	21536.8	16903.5	22729.3	17413.4	22143.4	25925.5
IPI:IPI00028279.5	TSPYL5	Testis-specific Y-encoded-like protein 5	291	23	C	UR	5065.93	10348.2	9611.96	6483.54	2728.13	3029.49
IPI:IPI00830108.1	DNAJC2	Isoform 1 of DnaJ homolog subfamily C member 2	292	81	C	UR	23441.6	22118.9	23293.7	29983.1	28022.7	22707.7
IPI:IPI00654731.1	DDX58	Isoform 1 of Probable ATP-dependent RNA helicase DDX58	293	48	C	UR	11815.8	13154.2	20335.4	20093	15993.1	19063.4
IPI:IPI00005904.3	DDX20	Probable ATP-dependent RNA helicase DDX20	294	65	C	UR	20127.9	21542.5	21454.1	23237.5	23509.2	18798.5
IPI:IPI00025273.1	GART	Isoform Long of Trifunctional purine biosynthetic protein adenosine-3	295	237	C	UR	71353.4	55555	58899.8	65881.7	59115.3	47568.1
IPI:IPI00292499.4	HSPA14	Heat shock 70 kDa protein 14	296	61	C	UR	15655.8	13394.8	14664.1	18593	18223.5	15033.5
IPI:IPI00217413.3	DHX29	ATP-dependent RNA helicase DHX29	297	76	C	UR	22398.8	21775.8	23163.6	19364.8	19614	21704.4
IPI:IPI00550766.1	RRP1	Ribosomal RNA processing protein 1 homolog A	298	75	C	UR	15824.5	14364.3	16251.8	14895.2	14939.9	11735.4
IPI:IPI00005490.1	GOLPH3	Golgi phosphoprotein 3	299	27	C	UR	9036.12	7007.48	7659.68	6551.17	6638.26	7765.92
IPI:IPI00009305.1	GNPDA1	Glucosamine-6-phosphate isomerase 1	300	96	C	UR	21116.7	19078.6	19830.2	24622.7	24174.1	28553
IPI:IPI00550894.4	GNPDA2	Isoform 1 of Glucosamine-6-phosphate isomerase 2	300	22	C	UR	5275.52	7118.72	8769.59	6418.86	6364.19	7357.78
IPI:IPI00217007.2	KIAA2013	Isoform 2 of Uncharacterized protein KIAA2013	301	8	C	UR	2741.07	2700.13	2991.99	2745.86	2800.48	2893.44
IPI:IPI00023786.1	PTPRCAP	Protein tyrosine phosphatase receptor type C-associated protein	302	2	C	UR	555.138	533.336	593.063	949.077	708.043	832.455
IPI:IPI00170935.1	LRRC47	Leucine-rich repeat-containing protein 47	303	147	C	UR	29706	35138.3	34181.6	34381.7	30774.2	30954.2
IPI:IPI00470629.4	C2orf34	Isoform 1 of Uncharacterized protein C2orf34	304	4	C	UR	1359.73	837.372	1021.88	1130.22	1009.07	835.131
IPI:IPI00063762.1	HPDL	4-hydroxyphenylpyruvate dioxygenase-like protein	305	16	C	UR	3479.19	5429.74	6430.36	3386.59	2953.48	3149.9
IPI:IPI00745105.1	C16orf13	Isoform 1 of UPF0585 protein C16orf13	306	9	C	UR	2015.98	2326.95	2445.6	2180.69	2576.8	2565.9
IPI:IPI00419237.3	LAP3	Isoform 1 of Cytosol aminopeptidase	307	184	C	UR	46021.6	39396.8	45971.7	54450.2	48023.7	41422.6
IPI:IPI00872409.2	RAP1GAP	RAP1 GTPase activating protein isoform a	308	23	C	UR	4310.23	8553.08	8425.33	5842.35	4421.22	5167.74
IPI:IPI00401939.6	GARNL4	Isoform 3 of Rap1 GTPase-activating protein 2	308	15	C	UR	2945.83	4489.01	4434.11	4945.33	4572.17	5337.4
IPI:IPI00414482.2	GTF3C1	Isoform 1 of General transcription factor 3C polypeptide 1	309	120	C	UR	30877.3	30498.4	33160.9	29852.8	33424.1	36490.2
IPI:IPI00102069.5	EIF3M	Eukaryotic translation initiation factor 3 subunit M	309	76	C	UR	20273.5	18139.2	23430.6	19719.1	18121.1	20602.7
IPI:IPI00026089.3	SF3B1	Splicing factor 3B subunit 1	310	396	C	UR	84598.7	85633.2	85371.7	96146.5	84868.6	85041.6
IPI:IPI00010388.1	CENPB	Major centromere autoantigen B	311	31	C	UR	9065.8	8672.11	10031	9229.01	9395.11	9084.64
IPI:IPI00604527.2	TARS2	Threonyl-tRNA synthetase, mitochondrial	312	35	C	UR	8696.97	7607.83	6984.05	7056.86	8803.42	10715.4
IPI:IPI00329633.5	TARS	Threonyl-tRNA synthetase, cytoplasmic	312	247	C	UR	80405.3	65739.5	69058.3	68967.7	61861.4	72635.4
IPI:IPI00216874.2	LYSMD2	Isoform 1 of LysM and putative peptidoglycan-binding domain-containing protein 2	312	10	C	UR	4558.57	3313.64	3277.23	4641.73	3791.02	3791.95
IPI:IPI00328082.3	TARSL2	Isoform 1 of Probable threonyl-tRNA synthetase 2, cytoplasmic	312	9	C	UR	4132.72	3311.04	3866.8	3477.53	3192.04	3984.54
IPI:IPI00045531.1	LYSMD1	LysM and putative peptidoglycan-binding domain-containing protein 1	312	7	C	UR	2921.39	2323.49	2416.61	2532.46	3141.8	3311.97
IPI:IPI00011898.3	EIF2B5	Translation initiation factor eIF-2B subunit epsilon	313	59	C	UR	9453.81	9182.66	9784.14	9827.88	9570.37	8750.53
IPI:IPI00739149.3	HGSNAT	Heparan-alpha-glucosaminide N-acetyltransferase	314	2	C	UR	229.138	232.713	239.045	264.1	280.532	262.97
IPI:IPI00022019.1	SAP30	Histone deacetylase complex subunit SAP30	315	9	C	UR	3442.11	4449.1	4011.26	5056.78	5128.32	4306.41
IPI:IPI00023461.2	MLLT4	Isoform 4 of Afadin	316	117	C	UR	37942	29819.2	27464.6	22112.6	37976	40077.5
IPI:IPI00216505.1	MLLT4	Isoform 3 of Afadin	316	2	C	UR	469.566	398.669	435.776	438.671	477.962	569.654
IPI:IPI00552897.2	MDC1	Isoform 1 of Mediator of DNA damage checkpoint protein 1	317	130	C	UR	27005.8	23782	23177.2	21998.5	23067.3	25625.9
IPI:IPI00871227.1	HMCN1	Isoform 1 of Hemicentin-1	318	21	C	UR	3988.63	8578.65	5549.5	4258.86	4656.89	5263.72
IPI:IPI00099834.4	UBN1	Isoform 1 of Ubinuclein-1	319	12	C	UR	1574.81	3265.9	3326.98	5133.93	4565.46	2987.72
IPI:IPI00291215.6	PARP14	poly (ADP-ribose) polymerase family, member 14	320	110	C	UR	28116.9	21708.4	25622.8	35373	35796.4	29007.8
IPI:IPI00167222.4	FAM123A	Isoform 2 of Protein FAM123A	321	34	C	UR	2831.34	12910.5	15498.2	11059.3	3152.23	3046.17
IPI:IPI00155601.1	MACROD1	MACRO domain-containing protein 1	322	35	C	UR	11882.7	11450	7906.81	6752.31	5914.59	6192.35
IPI:IPI00025019.3	PSMB1	Proteasome subunit beta type-1	323	100	C	UR	22759.8	21793.4	22767.5	22472.5	20779.2	23937.8
IPI:IPI00020127.1	RPA1	Replication protein A 70 kDa DNA-binding subunit	324	183	C	UR	42163.1	54636.3	56723	57045.2	58194	56679.5
IPI:IPI00006157.1	NSBP1	Nucleosome-binding protein 1	325	63	C	UR	6474.34	14318.8	11658.7	25953.7	26964.2	26544
IPI:IPI00298949.1	GAK	Cyclin G-associated kinase	326	69	C	UR	20766.5	16493.2	19724.6	25558.9	24736.5	26746.5
IPI:IPI00293126.1	TBCB	Tubulin folding cofactor B	327	62	C	UR	18524.2	16705	15562.4	17564.5	17856.5	17214.2
IPI:IPI00107752.3	OPA1	Isoform 2 of Dynamin-like 120 kDa protein, mitochondrial	328	143	C	UR	36364.9	32549.1	36629.9	36661.5	41277.8	46104.4
IPI:IPI00008236.6	CYB5R4	Cytochrome b5 reductase 4	329	6	C	UR	2497.89	2002.26	1969.38	1849.19	1807.01	2088.73
IPI:IPI00289334.1	FLNB	Isoform 1 of Filamin-B	330	713	C	UR	224050	181114	136302	167536	180444	200966
IPI:IPI00477536.3	FLNB	Filamin B	330	12	C	UR	2421.08	2001.93	1535.67	1979.2	1968.73	1489.69
IPI:IPI00900293.1	-	Filamin B	330	3	C	UR	1702.67	1145.01	576.59	613.618	995.091	841.783
IPI:IPI00012438.1	PRKRIR	Isoform Long of 52 kDa repressor of the inhibitor of the protein kinase	330	24	C	UR	6973	7830.66	8109.79	7771.98	8414.95	8107.37
IPI:IPI00302592.2	FLNA	Isoform 2 of Filamin-A	330	1623	C	UR	496037	425211	384639	335091	260275	307125
IPI:IPI00178352.5	FLNC	Isoform 1 of Filamin-C	330	162	C	UR	51780.8	60688.2	63298.6	42946.3	52831.5	60917.9
IPI:IPI00465361.4	RPL13	60S ribosomal protein L13	330	97	C	UR	23504.2	26633.3	31867	26493.9	26450	27114.6
IPI:IPI00065276.2	ASPSCR1	Isoform 2 of Tether containing UBX domain for GLUT4	331	23	C	UR	7249.07	7061.08	7308.18	6256.19	6474.18	8080.25
IPI:IPI00172578.2	EHF	Isoform 1 of ETS homologous factor	332	6	C	UR	2409.09	2072.81	929.988	734.905	4133.62	4099.56
IPI:IPI00011652.1	EFS	Isoform Efs1 of Embryonal Fyn-associated substrate	333	8	C	UR	1090.29	1537.5	1599.63	1539.77	2361.41	2681.6
IPI:IPI00411816.3	MRPL2	39S ribosomal protein L2, mitochondrial	334	26	C	UR	8379.45	7848.46	8655.68	7783.1	7555.88	8021.85
IPI:IPI00329025.1	JAGN1	Protein jagunal homolog 1	335	4	C	UR	649.389	572.056	755.316	785.731	772.579	898.183
IPI:IPI00015135.1	EXTL3	Exostosin-like 3	336	2	C	UR	283.109	220.475	260.14	182.107	227.575	296.73
IPI:IPI00220045.3	POLR3E	Isoform 1 of DNA-directed RNA polymerase III subunit RPC5	337	18	C	UR	4557.83	5962.99	5921.8	6681.67	6747.38	5367.56
IPI:IPI00107831.4	PTPRF	Isoform 1 of Receptor-type tyrosine-protein phosphatase F	338	87	C	UR	36249.4	20571.8	19715.1	14693.2	19297	18354
IPI:IPI00332272.2	PTPRS	Isoform PTPS-MEB of Receptor-type tyrosine-protein phosphatase S	338	29	C	UR	4274.18	9756.65	10288.2	6240.07	4739.5	5073.31
IPI:IPI00402083.3	TATDN3	Isoform 1 of Putative deoxyribonuclease TATDN3	339	15	C	UR	2995.5	4247.11	3465.73	3111.14	4939.76	5466.92
IPI:IPI00292548.3	RHPN2	Rhophilin-2	340	25	C	UR	20224.8	13489.9	5768.54	5027.5	6103.04	6809.13
IPI:IPI00008527.3	RPLP1	60S acidic ribosomal protein P1	341	161	C	UR	24685.5	26191.2	41974.1	26432.7	34678	35601.4
IPI:IPI00008529.1	RPLP2	60S acidic ribosomal protein P2	341	138	C	UR	26963.7	25489.7	32065	29332.4	25890.7	25606.2
IPI:IPI00024284.5	HSPG2	Basement membrane-specific heparan sulfate proteoglycan core protein	342	44	C	UR	4334.98	13320.5	6516.34	4927	4724.98	5574.97
IPI:IPI00022790.2	MFAP1	Microfibrillar-associated protein 1	343	59	C	UR	13728.2	14475	14034.6	16066.2	15162.3	13554.3
IPI:IPI00009104.7	RUVBL2	RuvB-like 2	344	300	C	UR	68934.3	81098.7	86853.8	89788.6	93027.4	69243.9
IPI:IPI00874020.2	PCBD2	Pterin-4-alpha-carbinolamine dehydratase 2	345	6	C	UR	3677.19	3170.82	3743.65	3881.65	4614.79	5290.95
IPI:IPI00218568.7	PCBD1	Pterin-4-alpha-carbinolamine dehydratase	345	17	C	UR	5435	5237.26	4949.68	3671.33	5279.66	6170
IPI:IPI00064219.3	NEURL4	Isoform 1 of Neuralized-like protein 4	346	18	C	UR	3488.42	4171.28	4659.26	4171.3	3693.64	3813.63
IPI:IPI00013679.1	DUT	Isoform 1 of Deoxyuridine 5'-triphosphate nucleotidohydrolase, mitochondrial	347	165	C	UR	23549.5	26766.9	38723.6	54853.8	40969.2	23289.1
IPI:IPI00418797.5	POLR1B	DNA-directed RNA polymerase	348	46	C	UR	15096.1	15796.7	17020.9	14205.1	13135.7	14965.2
IPI:IPI00377187.6	AKNA	Isoform 1 of AT-hook-containing transcription factor	349	6	C	UR	900.184	854.936	1092.93	1631.14	1611.83	1112.74
IPI:IPI00003793.1	KLHDC2	Isoform 1 of Kelch domain-containing protein 2	350	7	C	UR	1749.89	1647.83	1735.33	1498.91	1468.73	1444.1
IPI:IPI00156374.6	IPO4	Isoform 1 of Importin-4	351	89	C	UR	18836.8	16713.1	23272	19953.5	16880.7	18899.2
IPI:IPI00297851.1	CHD1	chromodomain helicase DNA binding protein 1	352	96	C	UR	21697.4	21278.7	23423.4	32886.4	31800.2	26483
IPI:IPI00023109.2	CHD2	Isoform 2 of Chromodomain-helicase-DNA-binding protein 2	352	55	C	UR	15091.5	14305	15001.2	17230.7	19810.6	21020
IPI:IPI00444371.3	WDR44	Isoform 1 of WD repeat-containing protein 44	353	62	C	UR	24881.3	19720.4	19468.9	19397.5	22749.9	23823.4
IPI:IPI00642310.1	STXBP2	syntaxin binding protein 2 isoform b	354	50	C	UR	18020.8	15286.7	14226.4	13622.6	11681.8	13810
IPI:IPI00025647.1	FBXO21	Isoform 2 of F-box only protein 21	354	7	C	UR	1749.49	2011.97	1682.9	1457.29	2206.35	2094.41
IPI:IPI00299000.5	PA2G4	Proliferation-associated protein 2G4	355	363	C	UR	77180.4	98641.4	98421.2	117080	112335	89210.3
IPI:IPI00440493.2	ATP5A1	ATP synthase subunit alpha, mitochondrial	355	571	C	UR	120080	127311	142012	123292	152822	151862
IPI:IPI00761051.1	C10orf137	Isoform 1 of Erythroid differentiation-related factor 1	356	16	C	UR	3759	4403.85	4551	3577.82	4423.99	4312.97
IPI:IPI00896427.1	C6orf132	Isoform 1 of Uncharacterized protein C6orf132	357	14	C	UR	6383.3	4223.9	1895.42	1846.08	2454.08	2275.89
IPI:IPI00031557.2	CTH	Isoform 1 of Cystathionine gamma-lyase	358	22	C	UR	4334.98	6685.95	7004.81	7784.51	4281.35	5296.47
IPI:IPI00297779.7	CCT2	T-complex protein 1 subunit beta	359	498	C	UR	86591.8	100670	105722	101823	101585	98180.2
IPI:IPI00221345.1	YTHDF1	Isoform 1 of YTH domain family protein 1	360	49	C	UR	11911	12298.5	12584.7	13357.7	13449.7	12872.7
IPI:IPI00396131.4	YTHDF3	cDNA FLJ56221, highly similar to YTH domain protein 3	360	58	C	UR	12432.9	14534	13822.3	11276.8	12349.7	13755.4
IPI:IPI00306043.1	YTHDF2	Isoform 1 of YTH domain family protein 2	360	70	C	UR	10173.3	14628.1	13062	13301.5	12110.3	12980.5
IPI:IPI00021786.1	RAF1	Isoform 1 of RAF proto-oncogene serine/threonine-protein kinase	361	36	C	UR	8791.89	9195.04	10747	10305.9	11447.9	11938.4
IPI:IPI00872240.1	ARAF	A-Raf proto-oncogene serine/threonine-protein kinase	361	24	C	UR	6342.82	5262.98	6017.1	5539.63	5699.33	6559.34
IPI:IPI00303797.3	BRAF	B-Raf proto-oncogene serine/threonine-protein kinase	361	14	C	UR	3177.06	3100.08	3176.53	3425.78	3387.62	4126.61
IPI:IPI00787773.2	-	224 kDa protein	361	1	C	UR	116.544	117.051	140.445	123.559	113.575	122.996
IPI:IPI00298258.4	UNC13B	Unc-13 homolog B	362	14	C	UR	4509.29	4353.86	4358.04	3673.79	4307.91	4633.36
IPI:IPI00164441.9	UNC13A	unc-13 homolog A	362	4	C	UR	1283.36	1323.47	1326.91	1142.58	1113.77	1330.95
IPI:IPI00552141.2	GRINL1A;GCOM1	Isoform 1 of Protein GRINL1A	363	14	C	UR	3732.68	3980.3	4582.98	5399.7	5172.43	4331.42
IPI:IPI00333063.1	TMCC1	Transmembrane and coiled-coil domains protein 1	364	3	C	UR	1762.01	1494.12	1764.52	1433.31	1369.41	1702.63
IPI:IPI00028027.3	GSDMD	Gasdermin-D	364	45	C	UR	8883.76	8578.93	12587.8	12768.4	11623.1	10354.4
IPI:IPI00013174.2	RBM14;RBM4	Isoform 1 of RNA-binding protein 14	365	164	C	UR	32888.7	32521.2	35068.5	36732.4	35110.6	35894.9
IPI:IPI00027838.1	RBM4B	RNA-binding protein 4B	365	12	C	UR	2244.65	1932.4	1763.05	1960.69	2151.79	2549.79
IPI:IPI00003704.4	RBM4	Isoform 1 of RNA-binding protein 4	365	113	C	UR	25148.3	24397.6	27608.9	22714.6	22854.9	24533.8
IPI:IPI00220213.1	TNC	Isoform 4 of Tenascin	366	38	C	UR	7770.05	7797.1	20661.5	22367.9	8379.84	9680.22
IPI:IPI00220216.1	TNC	Isoform 6 of Tenascin	366	1	C	UR	144.973	222.023	408.92	462.059	169.486	224.369
IPI:IPI00020194.1	TAF15	Isoform Short of TATA-binding protein-associated factor 2N	367	136	C	UR	17260.6	18544.1	16188.6	36430.6	27076.4	23586.2
IPI:IPI00221354.1	FUS	Isoform Short of RNA-binding protein FUS	367	159	C	UR	35932.3	50389.7	48342.3	39994.2	34772.8	37930.7
IPI:IPI00168388.1	SRP68	Isoform 1 of Signal recognition particle 68 kDa protein	368	172	C	UR	36311	36882.1	37976.9	37384.9	35784.7	31444
IPI:IPI00555989.1	ATP11C	Isoform 3 of Probable phospholipid-transporting ATPase IG	369	53	C	UR	11439.2	21896.5	23510.2	20310.5	14566.3	17612.5
IPI:IPI00396527.4	KLRAQ1	Isoform 1 of KLRAQ motif-containing protein 1	370	26	C	UR	8851.55	6697.42	6378.39	6492.89	6935.46	7845.22
IPI:IPI00827702.1	FCHSD2	Isoform 1 of FCH and double SH3 domains protein 2	371	18	C	UR	5311.16	6795.19	6799.77	5731.47	6632.74	7142.55
IPI:IPI00218693.8	APRT	Adenine phosphoribosyltransferase	372	35	C	UR	12465.5	9982.28	8746.54	8327.26	8795.27	6457.46
IPI:IPI00009982.1	TDRKH	Isoform 1 of Tudor and KH domain-containing protein	373	24	C	UR	9955.85	7658.37	4958.42	8537.38	9305.58	7669.96
IPI:IPI00027821.4	CRISPLD2	Isoform 1 of Cysteine-rich secretory protein LCCL domain-containing 2	374	1	C	UR	554.014	633.079	196.903	181.76	184.135	225.76
IPI:IPI00646377.1	EIF4G3	Isoform 1 of Eukaryotic translation initiation factor 4 gamma 3	375	69	C	UR	12275.2	31814.6	29411.3	23632.7	21523	23741.1
IPI:IPI00552639.2	EIF4G1	Isoform 1 of Eukaryotic translation initiation factor 4 gamma 1	375	240	C	UR	54306.7	48076.1	57459.9	55767.9	50529.6	53819.3
IPI:IPI00220365.6	EIF4G1	87 kDa protein	375	211	C	UR	43940.9	38377	45410.4	43486.5	40663.7	43279.3
IPI:IPI00411710.8	EIF4G3	Eukaryotic translation initiation factor 4 gamma, 3	375	7	C	UR	2403.06	4306.61	3481.8	3828.96	3136.58	2770.48
IPI:IPI00333908.1	CCDC91	Isoform 1 of Coiled-coil domain-containing protein 91	376	14	C	UR	4604.64	5128.55	4288.45	5000.85	4353.15	2581.3
IPI:IPI00152998.3	LRRC40	Leucine-rich repeat-containing protein 40	377	102	C	UR	28089.3	28879.2	27501	26562.8	26975.6	25961.4
IPI:IPI00382815.5	GPR107	Isoform 2 of Protein GPR107	378	7	C	UR	2698.75	2418.35	2471.72	2206.46	2365.88	2794.43
IPI:IPI00025307.1	CYP27A1	Sterol 26-hydroxylase, mitochondrial	379	24	C	UR	11264.1	9713.9	4305.44	4411.46	8133.8	9774.12
IPI:IPI00300223.2	SMCR7L	Putative uncharacterized protein RP5-1104E15.5	380	7	C	UR	2422.21	2176.73	2560.42	2302.37	2270.28	2419.04
IPI:IPI00157734.2	EXOC3	Isoform 1 of Exocyst complex component 3	381	59	C	UR	23282.3	19577.8	19438.7	18916.8	20428.2	22623.4
IPI:IPI00292530.1	ITIH1	Inter-alpha-trypsin inhibitor heavy chain H1	382	4	C	UR	355.766	379.419	394.818	341.612	691.439	1225.64
IPI:IPI00328228.4	CYTH1	Isoform 2 of Cytohesin-1	383	9	C	UR	3325.82	3697.47	3033.09	3337.98	2948.71	2642.11
IPI:IPI00013892.1	CYTH3	Isoform 1 of Cytohesin-3	383	7	C	UR	3701.27	2809.65	2739.04	2592.27	2811.7	3052.39
IPI:IPI00015228.1	CYTH2	Isoform 1 of Cytohesin-2	383	4	C	UR	1381.94	1219.38	1184.95	1134.3	1195.71	1215.55
IPI:IPI00303207.3	ABCE1	ATP-binding cassette sub-family E member 1	384	181	C	UR	47180.8	51434.9	50617.4	60074.8	54775.1	43431.5
IPI:IPI00009471.1	WDR3	WD repeat-containing protein 3	385	82	C	UR	22355.5	20700.6	23147.8	20037.4	19723.8	17276
IPI:IPI00151036.1	RNF13	RING finger protein 13	386	9	C	UR	2097.11	1457.18	2016.88	2342.96	2923.87	2222.02
IPI:IPI00412147.1	SLC27A4	Long-chain fatty acid transport protein 4	387	36	C	UR	10741	9838.01	11005.9	9423.87	10086.3	11991
IPI:IPI00442344.4	SLC27A1	Long-chain fatty acid transport protein 1	387	7	C	UR	2270.38	1851.95	1329.48	1092.25	1302	1504.04
IPI:IPI00013623.4	SLC27A3	Isoform 1 of Long-chain fatty acid transport protein 3	387	8	C	UR	1905.47	1687.67	1195.91	1213.72	1703.05	1807.49
IPI:IPI00410618.4	KIAA1143	Uncharacterized protein KIAA1143	388	20	C	UR	6750.17	8522.86	6072.26	12553.7	9098.51	8739.18
IPI:IPI00167002.3	ELF1	ETS-related transcription factor Elf-1	389	15	C	UR	3367.77	3039.9	3361.34	8155.93	7277.43	3093.14
IPI:IPI00009995.2	ELF2	Isoform 1 of ETS-related transcription factor Elf-2	389	13	C	UR	3254.04	3679.28	3730.08	5060.3	5678.6	5328.39
IPI:IPI00021924.1	H1FX	Histone H1x	390	70	C	UR	13586.8	16328	15133.4	15735.1	26440.5	29315.5
IPI:IPI00009303.1	RFX5	DNA-binding protein RFX5	391	19	C	UR	5414.44	4605.07	5143.95	6513.12	6236.36	7151.34
IPI:IPI00336016.3	CARS2	Probable cysteinyl-tRNA synthetase, mitochondrial	392	29	C	UR	12907.5	9922.17	7614.09	8389.17	9245.71	8974.05
IPI:IPI00001466.2	EML4	Echinoderm microtubule-associated protein-like 4	393	110	C	UR	35619.3	30994.2	29230.6	22850.8	20919.6	22022.7
IPI:IPI00009379.2	IGHMBP2	DNA-binding protein SMUBP-2	394	38	C	UR	8095.89	7470.56	9345.62	8064.12	8076.33	8144.03
IPI:IPI00419450.2	FBXO46	F-box only protein 46	395	3	C	UR	804.637	826.276	764.128	760.824	686.974	868.912
IPI:IPI00815713.1	TCOF1	Isoform 4 of Treacle protein	396	210	C	UR	53989	56608.8	66083.5	66022.3	57791.9	59277.7
IPI:IPI00914061.1	TCOF1	Treacher Collins-Franceschetti syndrome 1 isoform e	396	4	C	UR	426.661	512.53	525.207	568.121	335.053	350.797
IPI:IPI00022865.1	CCNA2	Cyclin-A2	397	40	C	UR	5718.65	6782.66	6252.77	8476.38	9789.34	9522.38
IPI:IPI00293396.5	AP1G1	adaptor-related protein complex 1, gamma 1 subunit isoform a	398	68	C	UR	22201.9	17751.6	22133.9	20575.4	18424.8	15293.6
IPI:IPI00027178.1	AP1G2	AP-1 complex subunit gamma-like 2	398	24	C	UR	8223.83	6484.86	6628.46	7607.67	11286.3	10831.8
IPI:IPI00009253.2	NAPA	Alpha-soluble NSF attachment protein	399	107	C	UR	23626.2	21806.6	25110.5	29761.4	33324.9	24625.3
IPI:IPI00064767.3	ARHGAP17	Isoform 1 of Rho GTPase-activating protein 17	400	75	C	UR	13462.8	31281.6	27813.1	21578.2	15354.2	17245.9
IPI:IPI00294840.6	AIM1	Absent in melanoma 1 protein	401	59	C	UR	32508.2	23415.1	9067.7	11449.3	11193.2	11022.8
IPI:IPI00000203.1	LRP6	Low-density lipoprotein receptor-related protein 6	402	10	C	UR	3004.45	3799.7	3460.89	3188.72	3870.18	3004.76
IPI:IPI00022229.1	APOB	Apolipoprotein B-100	402	39	C	UR	10166.3	7530.43	9238.12	11398	13437.4	22133.2
IPI:IPI00101374.6	TM9SF1	cDNA FLJ61658, highly similar to Transmembrane 9 superfamily protein member 1	402	28	C	UR	7253.52	6215.9	9755.1	11947.5	8339.9	8089.91
IPI:IPI00794397.1	CHMP4A	chromatin modifying protein 4A	402	4	C	UR	756.261	629.557	1069.13	1551.1	1133.01	902.042
IPI:IPI00744811.2	LRP5	Low-density lipoprotein receptor-related protein 5	402	1	C	UR	326.818	428.499	409.886	279.658	424.116	355.161
IPI:IPI00014439.4	QDPR	Dihydropteridine reductase	403	52	C	UR	11059.7	14107.8	12976.1	20524.6	20120.3	18769.1
IPI:IPI00303158.3	CMAS	Isoform 1 of N-acylneuraminate cytidylyltransferase	404	37	C	UR	13993.1	13032.1	10424.5	10460	12169.2	13042.3
IPI:IPI00746777.3	ADH5;ADH5P4	Alcohol dehydrogenase class-3	405	131	C	UR	27779.1	36343.8	33229.6	40734.4	38366	38352.1
IPI:IPI00002520.1	SHMT2	Serine hydroxymethyltransferase, mitochondrial	406	228	C	UR	51168	53326.4	61545.7	50653.2	58222.3	68795.9
IPI:IPI00002519.1	SHMT1	Isoform 1 of Serine hydroxymethyltransferase, cytosolic	406	53	C	UR	11426	14289	13355.1	14591.5	14014.7	15528.2
IPI:IPI00477971.4	TBL3	Transducin beta-like protein 3	407	79	C	UR	20450.4	18954.7	21835.4	18513	19095.1	18266
IPI:IPI00845479.1	CUGBP2	CUG triplet repeat, RNA binding protein 2 isoform 2	408	26	C	UR	3774.64	3675.94	4075.65	15300.5	16606.1	10216.3
IPI:IPI00034015.1	CUGBP1	Isoform 1 of CUG-BP- and ETR-3-like factor 1	408	72	C	UR	19488	17691.9	20475.4	20107.3	18839.3	17765.1
IPI:IPI00005537.2	MRPL12	39S ribosomal protein L12, mitochondrial	409	105	C	UR	21966	22193.2	23598.6	17034.3	18456.4	18553.7
IPI:IPI00002549.1	ANAPC2	Isoform 1 of Anaphase-promoting complex subunit 2	410	15	C	UR	4726.15	4690.19	5068.69	5777.22	5887.08	5226.31
IPI:IPI00180781.4	MLKL	Isoform 1 of Mixed lineage kinase domain-like protein	411	17	C	UR	6423.56	5270.17	5250.99	4166.17	4417.71	3762.98
IPI:IPI00442274.3	NFXL1	Isoform 1 of NF-X1-type zinc finger protein NFXL1	412	30	C	UR	9192.06	8310.94	8714.72	12334.3	11603.3	11828.2
IPI:IPI00305305.3	SIPA1	Signal-induced proliferation-associated protein 1	413	19	C	UR	3174.9	3356.39	4525.39	3796.63	5096.03	6183.68
IPI:IPI00021808.3	HARS	Histidyl-tRNA synthetase, cytoplasmic	414	134	C	UR	43455	37312.6	41419.1	41459.6	37683.7	43175.3
IPI:IPI00027445.1	HARS2	Probable histidyl-tRNA synthetase, mitochondrial	414	48	C	UR	21173	17991	14300.2	12625.2	14529.7	14112.7
IPI:IPI00148063.1	HEBP1	Heme-binding protein 1	415	45	C	UR	15473.2	13070	12057.3	10149.1	14541.6	18400.6
IPI:IPI00297113.1	TRIM32	Tripartite motif-containing protein 32	416	22	C	UR	4661.47	4680.5	5278.54	4644.4	4719.86	5731.43
IPI:IPI00024776.1	CLGN	Calmegin	417	42	C	UR	5814.01	7471.49	8189.24	12715.3	14538.1	16586.5
IPI:IPI00020984.2	CANX	cDNA FLJ55574, highly similar to Calnexin	417	349	C	UR	150509	119288	103251	79005.7	100366	110385
IPI:IPI00470771.4	SAMD4B	SAMD4B protein	418	25	C	UR	9171.35	7379.76	9377.62	7787.09	6866.25	8248.34
IPI:IPI00215893.8	HMOX1	Heme oxygenase 1	419	8	C	UR	2418.84	2663.11	2604.85	1541.8	2435.6	2867.24
IPI:IPI00023344.2	SYMPK	Isoform 1 of Symplekin	420	111	C	UR	28093.3	26220.8	26981.7	29864.5	32956.2	33864.1
IPI:IPI00293200.3	CUL9	P53-associated parkin-like cytoplasmic protein, isoform CRA_a	421	7	C	UR	1640.91	1288.39	1668.63	1510.94	2141.4	2299.66
IPI:IPI00001690.2	CUL7	Cullin-7	421	15	C	UR	4220.03	3536.45	4021.57	3183.06	2915.58	3408.13
IPI:IPI00296190.4	C10orf58	Uncharacterized protein C10orf58	422	38	C	UR	15134.3	13477.5	15969.4	12043.7	12405.7	15822.8
IPI:IPI00291800.1	EIF4ENIF1	Isoform 1 of Eukaryotic translation initiation factor 4E transporter	423	32	C	UR	11201.5	10507	10716.9	10072.9	10298.9	10383.3
IPI:IPI00026958.4	FDXR	Isoform Short of NADPH:adrenodoxin oxidoreductase, mitochondrial	424	67	C	UR	17982.7	17308.5	12772.3	13544.9	24636	15985.1
IPI:IPI00790677.2	FDXR	cDNA FLJ59386, highly similar to NADPH:adrenodoxin oxidoreductase, mitochondrial	424	1	C	UR	257.68	250.928	223.346	172.96	224.451	229.268
IPI:IPI00026156.2	HCLS1	Hematopoietic lineage cell-specific protein	425	84	C	UR	8892.97	12059.7	33214.4	53036.9	27079.5	11028.2
IPI:IPI00027456.1	SNAPC5	Isoform 1 of snRNA-activating protein complex subunit 5	426	1	C	UR	159.94	174.324	185.376	176.398	177.446	152.634
IPI:IPI00013184.1	ARD1A	N-terminal acetyltransferase complex ARD1 subunit homolog A	427	83	C	UR	20332.1	22371.5	23828.2	22588	21281.2	20341.4
IPI:IPI00100292.6	NPEPL1	Isoform 1 of Probable aminopeptidase NPEPL1	428	8	C	UR	3874.06	3334	3555.5	3193.4	2219.36	2688.25
IPI:IPI00477223.3	PNMAL1	Isoform 1 of PNMA-like protein 1	429	7	C	UR	442.99	900.431	673.253	453.327	598.33	545.498
IPI:IPI00328826.6	CADPS2	Putative uncharacterized protein CADPS2	430	27	C	UR	7858.4	6889.09	12358.3	10152.5	5484.67	6461.6
IPI:IPI00007818.3	CPSF3	Cleavage and polyadenylation specificity factor subunit 3	431	68	C	UR	16090.5	15609.9	16153.6	17324.8	17308.2	18216.3
IPI:IPI00183657.3	ZNF706	Zinc finger protein 706	432	12	C	UR	4574.91	3815.03	4147.85	6480.2	4532.62	4029.34
IPI:IPI00328161.8	FKBP8	cDNA FLJ56370, highly similar to Homo sapiens FK506 binding protein 8, 38kDa (FKBP8), mRNA	433	66	C	UR	17227	15260.2	16894.5	14930.2	16743.7	16547.4
IPI:IPI00019196.3	RPP30	Ribonuclease P protein subunit p30	434	13	C	UR	3077.07	2645.87	2746.07	2808.89	2812.44	2843.01
IPI:IPI00001730.3	FHOD1	FH1/FH2 domain-containing protein 1	435	33	C	UR	10294.4	8100.14	9071.34	7098.76	6120.31	6877.68
IPI:IPI00016480.3	NLRP2	Isoform 1 of NACHT, LRR and PYD domains-containing protein 2	436	46	C	UR	30339.8	21187.1	12878.2	11308.9	13238.4	15341.6
IPI:IPI00056324.1	HPS3	Isoform 1 of Hermansky-Pudlak syndrome 3 protein	437	19	C	UR	6463	4857.82	4931.34	5281.48	5737.77	6667.56
IPI:IPI00220014.2	IDI1	isopentenyl-diphosphate delta isomerase	437	52	C	UR	14503.6	10413.6	10821.3	15450.2	11383.8	8935.88
IPI:IPI00289776.3	MYCBP2	MYC binding protein 2	438	100	C	UR	32150.1	24910.2	28340.1	37281.6	38470.7	32002.1
IPI:IPI00607852.2	MYCBP2	Isoform 2 of Probable E3 ubiquitin-protein ligase MYCBP2	438	2	C	UR	176.361	165.413	244.021	272.098	390.728	381.323
IPI:IPI00218620.1	SON	Isoform D of SON protein	438	33	C	UR	12636.3	9814.9	9929.11	13113.3	13324.5	12062.5
IPI:IPI00218617.3	SON	SON protein	438	213	C	UR	61674.4	48629.4	49460.8	57520.1	60090.5	54801.4
IPI:IPI00106559.3	TAX1BP1	Isoform 2 of Tax1-binding protein 1	438	21	C	UR	9982.73	7353.39	5785.66	5790.56	6721.01	6835.65
IPI:IPI00013313.3	NOL12	Nucleolar protein 12	438	10	C	UR	4538.9	3653.12	4070.63	4141.27	2993.21	3210.39
IPI:IPI00166153.3	FTSJD2	FtsJ methyltransferase domain-containing protein 2	438	76	C	UR	19134.8	18116.3	20027.7	26775.9	26167.4	21396.3
IPI:IPI00008418.6	DIABLO	Diablo homolog, mitochondrial precursor	438	29	C	UR	7379.46	8338.85	7421.92	7224.31	6488.28	7282.82
IPI:IPI00146447.3	VMA21	Vacuolar ATPase assembly integral membrane protein VMA21	439	1	C	UR	77.5231	77.6012	99.3956	86.0483	106.506	96.3165
IPI:IPI00003527.5	SLC9A3R1	Na(+)/H(+) exchange regulatory cofactor NHE-RF1	440	90	C	UR	49415.8	33991	14504.5	31508.1	25951.7	14455
IPI:IPI00103247.1	HNRPLL	Isoform 1 of Heterogeneous nuclear ribonucleoprotein L-like	441	66	C	UR	12838.4	14321.4	14233.9	15090.3	14251.8	13628.2
IPI:IPI00027834.3	HNRNPL	Heterogeneous nuclear ribonucleoprotein L	441	475	C	UR	105357	106701	105058	117120	113295	110659
IPI:IPI00011416.2	ECH1	Delta(3,5)-Delta(2,4)-dienoyl-CoA isomerase, mitochondrial	441	189	C	UR	60614	52962	41801.2	39196.5	46450.3	39182.9
IPI:IPI00291922.2	PSMA5	Proteasome subunit alpha type-5	441	200	C	UR	53866.1	40246.5	41411.5	41164.3	36586	41839.5
IPI:IPI00550853.2	WWC2	Isoform 1 of Protein WWC2	441	14	C	UR	3183.69	4123.78	4571.59	3862.68	4050.26	4426.1
IPI:IPI00018298.3	IFIT2	Interferon-induced protein with tetratricopeptide repeats 2	441	14	C	UR	3228.82	4431.15	7703.49	4840.71	3668.17	3274.35
IPI:IPI00018300.2	IFIT1	Interferon-induced protein with tetratricopeptide repeats 1	441	40	C	UR	8489.03	9941.93	20561.2	21097.9	9416.68	7812.79
IPI:IPI00012756.1	IFIT5	Interferon-induced protein with tetratricopeptide repeats 5	441	21	C	UR	6097	6609.5	10277.1	12157.8	5943.35	6770.23
IPI:IPI00009326.1	YAP1	65 kDa Yes-associated protein	441	41	C	UR	15664.6	12120.2	13442.1	11125.2	6663.2	7655.33
IPI:IPI00216919.1	YAP1	Yes-associated protein 1, 65kDa isoform 1	441	10	C	UR	2323.58	1620.78	1524.31	1394.01	695.455	892.747
IPI:IPI00165946.1	MAGI1	Isoform 2 of Membrane-associated guanylate kinase, WW and PDZ domain-containing protein 1	441	16	C	UR	4532.89	3777.92	4528.13	3637.37	3935.93	4329.65
IPI:IPI00170865.2	MAGI3	Isoform 4 of Membrane-associated guanylate kinase, WW and PDZ domain-containing protein 3	441	22	C	UR	17102.8	11388.4	6741.8	6283.56	8637.98	9311.51
IPI:IPI00217340.2	WWC1	Isoform 1 of Protein WWC1	441	3	C	UR	2064.97	1709.27	980.633	803.953	837.029	1087.91
IPI:IPI00031960.2	POLR1A	DNA-directed RNA polymerase I subunit RPA1	442	131	C	UR	31053.5	32652.3	35948	30066.5	28122.9	31645.6
IPI:IPI00024163.1	POLR3A	DNA-directed RNA polymerase III subunit RPC1	442	47	C	UR	13330.8	15291.4	13975	15838.1	15422.5	12487.8
IPI:IPI00020966.1	PIGA	Isoform 1 of Phosphatidylinositol N-acetylglucosaminyltransferase subunit A	443	8	C	UR	1568.88	1557.39	1588.97	1440.55	1493.16	1742.56
IPI:IPI00298306.3	ATM	Serine-protein kinase ATM	443	42	C	UR	9332.28	13998	16427.6	12758.5	11185.4	13330.5
IPI:IPI00006713.1	DNAJC3	Isoform 1 of DnaJ homolog subfamily C member 3	444	58	C	UR	24607	20855.9	18074.7	15251.7	18018.6	21771.6
IPI:IPI00172636.5	CAMK2D	Isoform Delta 6 of Calcium/calmodulin-dependent protein kinase type II delta chain	444	82	C	UR	22048.8	19701.3	21252.4	18920.6	26025.8	34078.8
IPI:IPI00430291.6	CAMK2D	Isoform Delta 2 of Calcium/calmodulin-dependent protein kinase type II delta chain	444	1	C	UR	221.786	192.629	225.347	187.892	198.156	290.718
IPI:IPI00915327.1	CAMK2G	Isoform 2 of Calcium/calmodulin-dependent protein kinase type II gamma chain	444	22	C	UR	9247.96	8069.47	6446.31	5419.69	5715.69	6173.69
IPI:IPI00550746.4	NUDC	Nuclear migration protein nudC	444	260	C	UR	67402.5	94493.7	98046.1	89116.7	72617.5	73541.2
IPI:IPI00021557.6	TFAP2B	Isoform 1 of Transcription factor AP-2 beta	445	12	C	UR	2657.31	2574.41	2597.99	2048.11	8353.88	7377.88
IPI:IPI00009453.2	TFAP2A	Transcription factor AP-2 alpha (Activating enhancer binding protein 2 alpha), isoform CRA_c	445	19	C	UR	6185.96	4980.44	2712.9	2225.66	5870.74	5890.98
IPI:IPI00023260.1	TFAP2C	Transcription factor AP-2 gamma	445	3	C	UR	2290.67	1787.93	707.778	1047.17	925.993	1113.99
IPI:IPI00034006.1	PTPN23	Tyrosine-protein phosphatase non-receptor type 23	446	79	C	UR	24022.8	22736.6	21509	19888.1	25117.2	28059.2
IPI:IPI00478231.2	RHOA	Transforming protein RhoA	447	65	C	UR	18652.3	14809.9	15281.1	21771.1	21170	23473.8
IPI:IPI00027434.1	RHOC	Rho-related GTP-binding protein RhoC	447	59	C	UR	21833.2	17440.6	13374.8	15185.1	13477.5	14497.1
IPI:IPI00000873.3	VARS	Valyl-tRNA synthetase	447	310	C	UR	73059	63204.8	82216.8	70086.3	69980.8	81896.2
IPI:IPI00024893.5	LZTR1	Leucine-zipper-like transcriptional regulator 1	447	10	C	UR	2032.7	1939.22	1998.41	1681.86	2216.2	2080.09
IPI:IPI00013978.1	SPOP	Speckle-type POZ protein	447	5	C	UR	816.539	945.98	875.734	842.714	863.214	883.896
IPI:IPI00162199.1	TECPR1	Isoform 1 of Tectonin beta-propeller repeat-containing protein 1	447	9	C	UR	1442.46	1404.14	1508.56	1511.74	1553.36	1646.81
IPI:IPI00386755.2	ERO1L	ERO1-like protein alpha	447	49	C	UR	17349.5	14845.2	16959.9	18084.4	19932.9	18102.8
IPI:IPI00429633.6	ERO1LB	ERO1-like protein beta	447	7	C	UR	2475.63	3163.45	3279.81	2023.1	4076.09	4865.91
IPI:IPI00000041.1	RHOB	Rho-related GTP-binding protein RhoB	447	25	C	UR	5818.62	6343.89	7458.7	8282.01	5885.8	6844.1
IPI:IPI00010368.6	KIF2A	Isoform 1 of Kinesin-like protein KIF2A	448	96	C	UR	21974.5	24732.2	24798.1	30480.6	30070.3	31724.1
IPI:IPI00867529.1	KIF2A	Isoform 2 of Kinesin-like protein KIF2A	448	4	C	UR	148.952	250.512	245.168	386.263	317.58	390.891
IPI:IPI00290435.3	KIF2C	Isoform 1 of Kinesin-like protein KIF2C	448	103	C	UR	26612.4	31495	27056.8	26367.7	33278.2	30070.6
IPI:IPI00006265.1	ITGB1BP1	Isoform 1 of Integrin beta-1-binding protein 1	448	7	C	UR	2466.64	2306.59	2045.95	2208	2664.56	2472.85
IPI:IPI00221231.3	NUDT2	Bis(5'-nucleosyl)-tetraphosphatase [asymmetrical]	449	11	C	UR	2645.78	2983.03	3515.61	3206.85	3046.15	3303.52
IPI:IPI00012750.3	RPS25	40S ribosomal protein S25	450	70	C	UR	15890	15000.4	18263	17198.9	17032.7	14020.9
IPI:IPI00297241.3	URB1	Nucleolar pre-ribosomal-associated protein 1	451	72	C	UR	18965.4	16281.4	18934.8	21507.1	21790.7	17739.7
IPI:IPI00014068.1	PAK4	Isoform 1 of Serine/threonine-protein kinase PAK 4	452	70	C	UR	13465.6	11145.2	11924.9	9062.21	8992.63	10074.6
IPI:IPI00219601.2	MAPK7	Isoform 1 of Mitogen-activated protein kinase 7	452	9	C	UR	2715.19	2972.31	3117.37	2719.06	3178.97	3493.72
IPI:IPI00103925.2	IRGQ	Immunity-related GTPase family Q protein	453	48	C	UR	12303.3	9947.22	11682.1	11847.2	12938.2	14834
IPI:IPI00012856.1	FOXO3B;FOXO3	Forkhead box protein O3	454	12	C	UR	4938.76	4186.37	2596.79	2827.59	3856.45	4212.2
IPI:IPI00024316.3	FOXO4	Isoform 1 of Forkhead box protein O4	454	2	C	UR	643.452	486.635	488.696	643.879	617.266	724.88
IPI:IPI00289866.6	FOXO1	Forkhead box protein O1	454	1	C	UR	342.652	296.891	281.031	224.911	253.844	286.427
IPI:IPI00782966.1	ZFP106	Zinc finger protein 106 homolog	455	28	C	UR	8286.58	6465.63	7084.61	6756.83	7809.93	8120.5
IPI:IPI00307758.7	PITPNM1	Isoform 1 of Membrane-associated phosphatidylinositol transfer protein 1	456	11	C	UR	2223.2	1885.1	2160.03	1738	2693.45	2729.71
IPI:IPI00019812.1	PPP5C	Serine/threonine-protein phosphatase 5	457	140	C	UR	35828.5	38130.9	43063.9	38176.5	38147.4	43127.1
IPI:IPI00552442.1	CENPP	Centromere protein P	457	11	C	UR	2433.11	2951.9	3366.79	4077.45	4809.14	3756.59
IPI:IPI00432278.1	TTC14	Isoform 2 of Tetratricopeptide repeat protein 14	457	5	C	UR	1464.3	1282.48	1379.58	1531.47	1488.1	1703.5
IPI:IPI00004459.1	DIMT1L	Probable dimethyladenosine transferase	458	36	C	UR	8272.62	11651.1	12301.9	10034.4	10917.6	8949.22
IPI:IPI00001539.8	ACAA2	3-ketoacyl-CoA thiolase, mitochondrial	459	113	C	UR	28369.6	25807.8	26490.4	14221.1	31742	40308
IPI:IPI00000690.1	AIFM1	Isoform 1 of Apoptosis-inducing factor 1, mitochondrial	460	166	C	UR	51990.9	43979.4	34488.4	33700.4	33495	33677.3
IPI:IPI00012834.4	PPP2R5C	Isoform Gamma-3 of Serine/threonine-protein phosphatase 2A 56 kDa regulatory subunit gamma isoform	461	23	C	UR	4457.47	4473.23	5298.61	5463.67	5133.11	5158.72
IPI:IPI00000030.1	PPP2R5D	Isoform Delta-1 of Serine/threonine-protein phosphatase 2A 56 kDa regulatory subunit delta isoform	461	113	C	UR	28648.8	29649.5	32030.4	29262.7	27583.4	28956
IPI:IPI00063404.8	CPSF3L	Isoform 1 of Integrator complex subunit 11	461	30	C	UR	9867.15	11159.6	10478.2	10344.4	11053.8	11856.7
IPI:IPI00002853.1	PPP2R5E	Serine/threonine-protein phosphatase 2A 56 kDa regulatory subunit epsilon isoform	461	36	C	UR	11114.8	10548.2	12392.9	11271.4	12672.2	13537.3
IPI:IPI00014980.1	PPP2R5B	Isoform Beta-1 of Serine/threonine-protein phosphatase 2A 56 kDa regulatory subunit beta isoform	461	4	C	UR	1080.99	1002.31	928.879	1133.42	953.397	1157.17
IPI:IPI00021106.4	EXOG	Isoform 1 of Nuclease EXOG, mitochondrial	461	11	C	UR	1624.49	1789.86	1963.27	2189.14	2336.03	2540.72
IPI:IPI00165073.8	SMYD3	Isoform 1 of SET and MYND domain-containing protein 3	461	17	C	UR	3212.99	6488.6	5262.98	6505.03	7511.21	8066.51
IPI:IPI00215790.6	RPL38	60S ribosomal protein L38	461	36	C	UR	8415.85	8780.13	11395.3	9941.64	13755.4	13590.6
IPI:IPI00014978.3	PPP2R5A	Serine/threonine-protein phosphatase 2A 56 kDa regulatory subunit alpha isoform	461	14	C	UR	6859.81	4790.08	3180.36	3044.3	4089.38	4569.96
IPI:IPI00006378.3	CCDC72	Coiled-coil domain-containing protein 72	461	22	C	UR	4919.5	4777.67	5684.16	13649.4	10736.9	8625.65
IPI:IPI00002511.2	ATF6	Cyclic AMP-dependent transcription factor ATF-6 alpha	462	2	C	UR	1448.55	1374.07	1541.54	1311.65	1486.4	1738.65
IPI:IPI00020557.1	LRP1	Prolow-density lipoprotein receptor-related protein 1	463	64	C	UR	13679.4	28900.3	22356.3	14170.2	22852.3	24983.5
IPI:IPI00032063.7	LRP1B	Similar to Candidate tumor suppressor protein	463	4	C	UR	1232.91	1284.02	1245.67	1123.77	1469.62	1605.08
IPI:IPI00335581.5	UBR3	Isoform 1 of E3 ubiquitin-protein ligase UBR3	464	12	C	UR	3303.95	3229.44	3975.89	2767.47	2892.94	3077.83
IPI:IPI00399053.4	NDUFAF3	Uncharacterized protein C3orf60	464	10	C	UR	4181.12	3417.2	3564.54	3250.8	3529.51	4143.19
IPI:IPI00018813.5	COPS2	Isoform 2 of COP9 signalosome complex subunit 2	465	76	C	UR	21217.1	23586.9	23448.9	23354	21741.2	24439.1
IPI:IPI00019178.2	PSPH	Phosphoserine phosphatase	466	65	C	UR	31963.3	27972.5	13485.7	13446.6	14400.6	15336.2
IPI:IPI00187144.5	TTC39B	74 kDa protein	467	1	C	UR	248.386	178.623	106.626	104.145	124.405	184.693
IPI:IPI00329615.5	ISCA1	HESB like domain containing 2, isoform CRA_b	468	15	C	UR	4449.01	7773.67	6951.92	3816.76	4485.25	4281.29
IPI:IPI00234446.2	ATF2	Isoform 1 of Cyclic AMP-dependent transcription factor ATF-2	469	11	C	UR	2900.25	3631.75	2858.21	4027.43	3006.03	3120.61
IPI:IPI00009975.4	ATF7	Isoform 4 of Cyclic AMP-dependent transcription factor ATF-7	469	13	C	UR	2686.62	4268.97	3796.13	3662.38	3055.35	3346.74
IPI:IPI00105598.3	PSMD11	Proteasome 26S non-ATPase subunit 11 variant (Fragment)	470	170	C	UR	42336.3	37135.7	43386.2	45033.4	44489.5	40683.3
IPI:IPI00305627.7	C16orf58	Isoform 1 of UPF0420 protein C16orf58	471	13	C	UR	6636.2	5134.17	5267.31	5018.75	4689.72	5537.16
IPI:IPI00010200.3	YTHDC2	Probable ATP-dependent RNA helicase YTHDC2	472	56	C	UR	17643.3	14925.7	14403.4	16332.6	17839	19365.8
IPI:IPI00009329.2	UTRN	Utrophin	472	105	C	UR	38169.1	27855.8	38922.4	37466.1	40502.9	46886.9
IPI:IPI00641422.1	UTRN	Utrophin	472	1	C	UR	52.1663	55.6032	70.5172	62.7367	55.147	82.4281
IPI:IPI00106687.4	LXN	Latexin	473	24	C	UR	18287.4	14660.9	3398.56	3544.93	3053.27	3103.76
IPI:IPI00908469.1	-	cDNA FLJ52712, highly similar to Tubulin beta-6 chain	474	27	C	UR	5540.33	10963.1	11489.5	9283.88	3075.34	3203.77
IPI:IPI00011654.2	TUBB	Tubulin beta chain	474	274	C	UR	49195.8	47918	54134.9	58843.7	63055.2	52580.8
IPI:IPI00013475.1	TUBB2A	Tubulin beta-2A chain	474	124	C	UR	13422.3	17531.7	25071.2	23988.6	43878.1	56354.6
IPI:IPI00013683.2	TUBB3	Tubulin beta-3 chain	474	67	C	UR	13532.9	18543	28156.8	24990.6	17380.7	22281.2
IPI:IPI00031370.3	TUBB2B	Tubulin beta-2B chain	474	9	C	UR	224.834	795.209	1850.23	1662.35	6464.19	7837.18
IPI:IPI00007752.1	TUBB2C	Tubulin beta-2C chain	474	1607	C	UR	263302	292636	318825	323757	333231	345789
IPI:IPI00023598.2	TUBB4	Tubulin beta-4 chain	474	21	C	UR	2483.07	6769.64	6230.02	4241.78	7662.14	8954.18
IPI:IPI00641706.1	TUBB6	46 kDa protein	474	58	C	UR	9142.84	14871.3	15654	12676.2	6840.61	8008.91
IPI:IPI00478961.1	FGGY	Isoform 1 of FGGY carbohydrate kinase domain-containing protein	475	3	C	UR	467.499	395.44	421.033	387.086	429.54	527.554
IPI:IPI00335509.3	DPYSL5	Dihydropyrimidinase-related protein 5	476	95	C	UR	13787.9	33007	28486.1	21052	34597.7	39019.4
IPI:IPI00031195.5	VANGL1	Isoform 1 of Vang-like protein 1	477	13	C	UR	7772.72	5079.34	5207.89	4359.68	4493.78	4856.72
IPI:IPI00005822.2	CDC23	cell division cycle protein 23	478	31	C	UR	7498.58	8630.26	9059.25	10357.1	10450.9	8173.25
IPI:IPI00291544.3	SQLE	Squalene monooxygenase	479	10	C	UR	2809.22	2091.64	3376.66	3853.61	3482.03	2784.58
IPI:IPI00250297.3	AASDHPPT	L-aminoadipate-semialdehyde dehydrogenase-phosphopantetheinyl transferase	480	44	C	UR	9816.43	12022.7	12846.7	11442.8	11741.3	8884.58
IPI:IPI00328847.5	NAT11	Isoform 1 of N-acetyltransferase 11	481	17	C	UR	3941.8	2893.09	2386.57	3021.46	3255.76	2713.93
IPI:IPI00300504.5	UPF2	Isoform 1 of Regulator of nonsense transcripts 2	482	74	C	UR	21549	18741	18621.9	22107.9	20909.2	22971.7
IPI:IPI00157790.7	KIAA0368	KIAA0368 protein	483	186	C	UR	53126.2	67835.1	61553	44463.7	46280.1	54530.5
IPI:IPI00554541.2	ILVBL	Isoform 1 of Acetolactate synthase-like protein	484	55	C	UR	10181.7	9629.87	11142.8	9424.85	9635.98	11058.6
IPI:IPI00337307.3	TRMT2A	Isoform 1 of tRNA (uracil-5-)-methyltransferase homolog A (Fragment)	485	32	C	UR	7397.53	6381.43	6054.7	6642.19	6516.84	7185.96
IPI:IPI00550364.8	PGM2	Phosphoglucomutase-2	486	103	C	UR	34901.4	28667.5	22206.6	35964.9	30119	34482.5
IPI:IPI00013774.1	HDAC1	Histone deacetylase 1	486	139	C	UR	26848.1	33691.7	33212.7	40726.2	41829.9	37429.5
IPI:IPI00289601.1	HDAC2	histone deacetylase 2	486	77	C	UR	20758.3	19320.7	19049	18554.4	19094.9	19691.5
IPI:IPI00006187.1	HDAC3	Isoform 1 of Histone deacetylase 3	486	21	C	UR	4934.03	6222.44	5322.84	5843.79	5816.21	5734.96
IPI:IPI00294754.7	TRIM44	Tripartite motif-containing protein 44	487	7	C	UR	3052.52	2419.01	6282.9	5098.51	2512.32	2172.17
IPI:IPI00217462.1	APAF1	Isoform 4 of Apoptotic protease-activating factor 1	488	47	C	UR	13355.5	16542.9	14820.8	11665.7	22535.1	25628.7
IPI:IPI00305833.3	SMU1	WD40 repeat-containing protein SMU1	488	128	C	UR	27728.6	27807.6	29273.5	32164	30652.9	31361.4
IPI:IPI00782974.1	C17orf85	Isoform 1 of Uncharacterized protein C17orf85	488	56	C	UR	14986.2	22379.5	19100.5	19876	20278.2	20037.9
IPI:IPI00032853.1	NOP10	H/ACA ribonucleoprotein complex subunit 3	488	14	C	UR	3397	3685.83	4484.37	4853.46	5228.18	5128.97
IPI:IPI00024709.1	IKBKB	Inhibitor of nuclear factor kappa-B kinase subunit beta	489	47	C	UR	10679.7	11767.6	11133.3	11736.7	10774.2	10632.3
IPI:IPI00005104.1	CHUK	Inhibitor of nuclear factor kappa-B kinase subunit alpha	489	39	C	UR	13479.8	12768.6	13732	15769.4	16475.7	16602.5
IPI:IPI00386311.2	SMARCAL1	SWI/SNF-related matrix-associated actin-dependent regulator of chromatin subfamily A-like protein 1	490	16	C	UR	4312.85	4842.96	4343.93	5539.64	4870.93	4094.21
IPI:IPI00005858.1	LATS1	Isoform 1 of Serine/threonine-protein kinase LATS1	490	21	C	UR	5907.57	6066.92	6655.98	4818.67	6268.09	6374.38
IPI:IPI00454910.1	CDC42BPG	Serine/threonine-protein kinase MRCK gamma	490	27	C	UR	14154.2	11386.3	5211.01	5056.3	7420.24	8127.16
IPI:IPI00742682.2	TPR	Nucleoprotein TPR	490	519	C	UR	128160	132027	135493	133485	146219	162998
IPI:IPI00395444.7	CAMSAP1	Isoform 1 of Calmodulin-regulated spectrin-associated protein 1	490	47	C	UR	12546.4	14010.2	15111.7	14590.5	15323.9	15291.8
IPI:IPI00477763.4	CDC42BPB	Serine/threonine-protein kinase MRCK beta	490	80	C	UR	28151.9	27289.4	32185.2	25706.9	29375	33515.1
IPI:IPI00783133.3	METTL14	Methyltransferase-like protein 14	490	29	C	UR	5504.45	6116.69	6901.55	7057.49	6575.05	6498.34
IPI:IPI00016725.2	GTF3C4	General transcription factor 3C polypeptide 4	490	89	C	UR	21633.4	25415	24582	22579.1	25113.2	30122.1
IPI:IPI00217874.2	RCOR2	REST corepressor 2	490	13	C	UR	3809.3	3814.69	3645.71	3247.96	4427.91	5065.01
IPI:IPI00903300.3	RCOR3	Isoform 1 of REST corepressor 3	490	29	C	UR	6455.06	5456.5	5191.46	4894.86	8128.16	9024.68
IPI:IPI00550263.1	CDC42BPA	Isoform 5 of Serine/threonine-protein kinase MRCK alpha	490	31	C	UR	9391.99	10847.5	10489.2	7596.6	11718.4	12949.7
IPI:IPI00008531.1	RCOR1	REST corepressor 1	490	96	C	UR	20639.1	23874.2	25994.3	22806	23752.8	22871.3
IPI:IPI00017895.3	GPD2	Isoform 1 of Glycerol-3-phosphate dehydrogenase, mitochondrial	490	180	C	UR	46706.1	43184.6	48756.7	35556.4	43098.6	56273.9
IPI:IPI00007722.2	AMPD2	Adenosine monophosphate deaminase 2	490	80	C	UR	25719.7	26003.2	31028.5	28846	20325.2	21868.4
IPI:IPI00184670.4	AMPD2	Isoform Ex1A-2-3 of AMP deaminase 2	490	3	C	UR	462.474	435.596	575.76	592.581	259.211	306.136
IPI:IPI00009960.6	IMMT	Isoform 1 of Mitochondrial inner membrane protein	490	329	C	UR	83696.8	76943.7	89836.4	82203.9	92270.6	86103.8
IPI:IPI00470829.3	IMMT	inner membrane protein, mitochondrial isoform 2	490	3	C	UR	745.661	581.204	679.24	718.616	759.898	718.686
IPI:IPI00554469.1	IMMT	Isoform 2 of Mitochondrial inner membrane protein	490	15	C	UR	2224.6	2151.41	2440.79	2030.06	1831.47	2035.56
IPI:IPI00300573.2	AMPD3	Isoform 1B of AMP deaminase 3	490	3	C	UR	299.608	222.481	253.121	441.561	399.888	404.843
IPI:IPI00477535.6	ERCC5	Isoform 1 of DNA repair protein complementing XP-G cells	490	24	C	UR	6157.97	4928.26	5697.91	7176.33	7831.67	7069.4
IPI:IPI00337325.3	HMMR	Isoform A of Hyaluronan mediated motility receptor	490	48	C	UR	16064.2	15104.8	13946.6	14473.9	21009.7	27067.1
IPI:IPI00045798.3	GPX7	Glutathione peroxidase 7	490	17	C	UR	3311.7	6790.05	8579.22	6626.13	3706.86	4835.63
IPI:IPI00061802.5	ADAT3	tRNA-specific adenosine deaminase-like protein 3	491	6	C	UR	1146.48	1091.38	1213.25	1045.16	922.019	1147.49
IPI:IPI00470883.2	STAG2	stromal antigen 2 isoform a	492	72	C	UR	17086.4	13915.7	18113.9	30596.9	25039.8	22060.8
IPI:IPI00844578.1	DHX9	ATP-dependent RNA helicase A	492	680	C	UR	123052	130362	132157	125718	131159	147122
IPI:IPI00025158.2	STAG1	Cohesin subunit SA-1	492	77	C	UR	17020.4	16649.7	18257.6	25290.9	22653	21819.6
IPI:IPI00436632.1	NIPBL	Isoform 1 of Nipped-B-like protein	493	118	C	UR	35552.9	37450.4	34971.2	43679.8	42581.8	42261.4
IPI:IPI00151988.4	ZNF532	Zinc finger protein 532	494	13	C	UR	2261.7	4800.71	3865.98	2525.64	2622.7	2787.88
IPI:IPI00005087.1	TMOD3	Tropomodulin-3	495	87	C	UR	24019.7	23276	26192.9	22021.8	20527.8	19178.6
IPI:IPI00005089.1	TMOD2	Tropomodulin-2	495	7	C	UR	1965.26	2788.84	3360.35	4365.39	4230.63	7237.42
IPI:IPI00002375.3	TMOD1	Tropomodulin-1	495	19	C	UR	7702.62	5769.6	3114.35	3001.4	3928.42	4569.95
IPI:IPI00008333.1	VGLL1	Transcription cofactor vestigial-like protein 1	496	4	C	UR	4217.18	1737.88	781.083	756.566	762.802	849.624
IPI:IPI00184997.4	DLGAP5	discs large homolog 7 isoform b	497	87	C	UR	23893.5	28480.3	27541	27016.7	27213.5	27430.7
IPI:IPI00299088.3	BAIAP2	Isoform 1 of Brain-specific angiogenesis inhibitor 1-associated protein 2	497	57	C	UR	27336.5	21293.6	20946.8	20331.9	12132.4	14199.9
IPI:IPI00166710.4	ZCCHC7	Isoform 2 of Zinc finger CCHC domain-containing protein 7	498	9	C	UR	2933.37	2483.71	3018.05	2964.94	2932.73	2315.2
IPI:IPI00430411.1	CAMK4	Calcium/calmodulin-dependent protein kinase type IV	499	18	C	UR	2432.06	2459.01	2640.4	7370.47	9332.21	9151.01
IPI:IPI00021917.1	RIPK2	Isoform 1 of Receptor-interacting serine/threonine-protein kinase 2	499	14	C	UR	4441.42	3840.4	3925.03	4000.2	4140.36	4946.92
IPI:IPI00296830.5	LUZP1	Isoform 1 of Leucine zipper protein 1	500	103	C	UR	43753.4	35516.7	34040.1	26921.4	26853.2	28802.5
IPI:IPI00215888.4	SRP72	Signal recognition particle 72 kDa protein	500	123	C	UR	37117.8	39788.2	40274.2	38528.4	38088.7	33160.3
IPI:IPI00219622.3	PSMA2	Proteasome subunit alpha type-2	501	153	C	UR	28795.5	25966.9	28913.4	27669.1	26264.5	28487.5
IPI:IPI00296421.2	EHBP1L1	EH domain-binding protein 1-like protein 1	501	61	C	UR	17654.4	14074.8	18944.8	13286.1	12688.1	14114.9
IPI:IPI00178187.4	EHBP1	Isoform 1 of EH domain-binding protein 1	501	38	C	UR	14917.5	12683.5	13472	12179.1	16407.7	17435.9
IPI:IPI00009901.1	NUTF2	Nuclear transport factor 2	501	66	C	UR	12211.3	15306.3	16756.1	17293.9	13472.2	13412
IPI:IPI00296388.4	BAZ2A	Isoform 1 of Bromodomain adjacent to zinc finger domain protein 2A	501	62	C	UR	19872.3	24267.3	21768.6	16924.6	17981.5	19869.4
IPI:IPI00735369.3	SETD5	Isoform 2 of SET domain-containing protein 5	501	1	C	UR	11.8608	9.27859	9.4458	16.9006	20.893	20.3263
IPI:IPI00103554.1	GATAD2B	Transcriptional repressor p66-beta	502	91	C	UR	18462.1	23240.5	19376.8	25176.9	22340.3	23338.3
IPI:IPI00410330.3	GATAD2A	Isoform 1 of Transcriptional repressor p66-alpha	502	99	C	UR	27801.2	24670.8	30338.7	32954.7	29419.2	27352
IPI:IPI00329275.7	VRK2	Isoform 1 of Serine/threonine-protein kinase VRK2	503	12	C	UR	4558.43	3238.39	2839.7	2518.61	3391.6	3823.14
IPI:IPI00029533.1	ITGB8	Integrin beta-8	504	2	C	UR	791.385	688.994	388.573	415.931	541.118	607.101
IPI:IPI00029468.1	ACTR1A	Alpha-centractin	504	147	C	UR	31308.3	32780.8	33296.2	33397.3	33960.3	33804.5
IPI:IPI00029469.1	ACTR1B	Beta-centractin	504	15	C	UR	4195.81	3317.9	3604.2	3560.66	3621.29	3545.01
IPI:IPI00008603.1	ACTA2	Actin, aortic smooth muscle	504	586	C	UR	170939	152580	129527	111205	130184	119114
IPI:IPI00021439.1	ACTB	Actin, cytoplasmic 1	504	1333	C	UR	238697	203958	184005	171493	181622	190445
IPI:IPI00738655.2	LOC653781	similar to protein expressed in prostate, ovary, testis, and placenta 2	504	1	C	UR	677.951	590.934	722.149	819.66	832.641	550.537
IPI:IPI00003269.1	ACTBL2	Beta-actin-like protein 2	504	443	C	UR	129993	111466	101405	86642.4	101930	94240.9
IPI:IPI00005159.3	ACTR2	Actin-related protein 2	504	130	C	UR	37400.7	31026.9	36392.3	41200.4	39945.5	36644.1
IPI:IPI00026673.4	CUX1	Isoform 1 of Homeobox protein cut-like 1	505	73	C	UR	18562.4	17368.2	19133.5	21940.9	21878.2	23786.3
IPI:IPI00022370.7	CUX2	cut-like 2	505	6	C	UR	1821.44	1210.31	1347.77	2029.26	1701.96	1437.14
IPI:IPI00071696.2	CUX1	Protein CASP	505	9	C	UR	2116.96	2019.06	1802.74	2118.86	2568.65	2272.72
IPI:IPI00306543.4	GDF15	Growth/differentiation factor 15	506	5	C	UR	691.309	579.781	745.614	3692.29	1091.31	814.731
IPI:IPI00790334.1	POLE	DNA polymerase	507	83	C	UR	18328.5	22955.4	25040.6	23964.8	23093.5	23197.2
IPI:IPI00029264.3	CYC1	Cytochrome c1, heme protein, mitochondrial	508	95	C	UR	14888.3	19619.8	23147.7	19682.5	15619	18563.6
IPI:IPI00306127.1	THUMPD3	THUMP domain-containing protein 3	509	27	C	UR	7431.68	6150.86	9078.97	12033	11879.7	11182.5
IPI:IPI00749429.1	TTYH3	Isoform 1 of Protein tweety homolog 3	510	13	C	UR	3140.69	2803.58	8619.96	6628.56	3339.52	3055.52
IPI:IPI00019994.4	CXorf15	Gamma-taxilin	511	55	C	UR	17411.4	13185.5	13970.6	15667	15241.6	15760.5
IPI:IPI00470779.2	TXLNA	Alpha-taxilin	511	115	C	UR	40870.4	33976.4	29049.2	28798.2	27007.2	28958.9
IPI:IPI00005030.5	SH3BP4	Isoform 1 of SH3 domain-binding protein 4	512	21	C	UR	8660.49	7636.71	6314.2	5250.94	10791.9	10770.8
IPI:IPI00170594.5	AHCTF1;AHCTF1P	Isoform 1 of AT-hook-containing transcription factor 1	513	185	C	UR	47134	44127.8	47260.8	44877.7	51979.7	56347.1
IPI:IPI00843802.1	KIAA0284	Isoform 1 of Protein KIAA0284	514	13	C	UR	5509.63	5020.1	4074.64	3440.56	4033.74	4410.26
IPI:IPI00186194.5	CEP170	Isoform 1 of Centrosomal protein of 170 kDa	514	138	C	UR	26748.4	46611.5	37761.9	27805	45721.6	47052.4
IPI:IPI00477477.4	CEP170	Isoform 2 of Centrosomal protein of 170 kDa	514	1	C	UR	282.139	467.133	465.881	252.411	602.521	524.165
IPI:IPI00910412.1	CEP170	cDNA FLJ60844, highly similar to Homo sapiens centrosomal protein 170 kDa (CEP170), transcript variant alpha, mRNA	514	1	C	UR	272.974	410.384	321.649	294.659	567.929	368.987
IPI:IPI00550875.2	CEP170L	Cep170-like protein	514	1	C	UR	47.7686	53.6029	53.5793	46.2296	56.698	58.2397
IPI:IPI00002212.1	STK24	Isoform B of Serine/threonine-protein kinase 24	515	56	C	UR	27722.9	21085.6	13656.3	16305.2	18245.1	16375.9
IPI:IPI00012093.1	STK25	Serine/threonine-protein kinase 25	515	14	C	UR	4434.73	4798.16	5188.11	4465	5758.06	5662.78
IPI:IPI00292827.3	RP6-213H19.1	Serine/threonine-protein kinase MST4	515	38	C	UR	8820.29	8072.52	8042.61	11118.2	10628.3	5186.84
IPI:IPI00025796.3	NDUFS3	NADH dehydrogenase [ubiquinone] iron-sulfur protein 3, mitochondrial	516	88	C	UR	17905.1	16051.5	18412	16073.6	14682.9	15334.2
IPI:IPI00290184.4	METTL1	tRNA (guanine-N(7)-)-methyltransferase	517	12	C	UR	2882.68	2651.2	2791.73	2596.31	2162.4	2628.39
IPI:IPI00410319.1	C10orf46	Isoform 1 of Uncharacterized protein C10orf46	518	18	C	UR	4153.59	4156.36	4018.18	3552.75	3716.67	3683.07
IPI:IPI00005914.4	SHPK	Sedoheptulokinase	519	19	C	UR	3580.89	5616.25	6042.67	4259.85	5025.21	5565.55
IPI:IPI00018500.1	ARID3A	AT-rich interactive domain-containing protein 3A	520	8	C	UR	737.677	832.249	870.053	805.186	1183.38	1439.73
IPI:IPI00328266.4	ARID3B	Isoform 1 of AT-rich interactive domain-containing protein 3B	520	2	C	UR	722.385	750.71	458.833	397.183	410.575	452.518
IPI:IPI00293078.1	DDX27	Probable ATP-dependent RNA helicase DDX27	521	119	C	UR	39212.7	34054.3	37009.2	40282.6	38581.9	28940.1
IPI:IPI00011578.1	NPTN	Isoform 1 of Neuroplastin	522	12	C	UR	3282.43	2608.74	3110.09	2605.31	2923.91	3468.02
IPI:IPI00292787.6	ACTR5	Actin-related protein 5	523	33	C	UR	7831.13	8106.66	9108.86	10468.7	11401.9	8947.38
IPI:IPI00020943.3	NR0B1	Isoform 1 of Nuclear receptor subfamily 0 group B member 1	524	17	C	UR	3573.63	3292.44	14716.1	13887.6	2919.86	3445.89
IPI:IPI00010133.3	CORO1A	Coronin-1A	525	111	C	UR	17977.3	16032	16249.1	81934.2	59674.3	23568
IPI:IPI00007058.1	CORO1B	Coronin-1B	525	93	C	UR	46306.8	35390.1	21087.9	19222.1	17164.3	20530.5
IPI:IPI00867509.1	CORO1C	Coronin-1C_i3 protein	525	125	C	UR	31096.4	56885	45200.3	36431.4	30670.4	35436.9
IPI:IPI00294065.6	GOLGA5	Isoform 1 of Golgin subfamily A member 5	525	44	C	UR	16179.1	13731.8	14002.7	12615.2	13266.8	14175.3
IPI:IPI00329791.9	DDX46	cDNA FLJ78679, highly similar to Homo sapiens DEAD (Asp-Glu-Ala-Asp) box polypeptide 46 (DDX46), mRNA	525	344	C	UR	103633	93382.3	99318.1	109289	105651	112563
IPI:IPI00014589.1	CLTB	Isoform Brain of Clathrin light chain B	525	27	C	UR	12507.8	9762.72	7498.32	8373.62	10229.1	12228.4
IPI:IPI00144293.4	YTHDC1	Isoform 1 of YTH domain-containing protein 1	525	55	C	UR	10137.6	10917.4	11494.5	15091.8	15716.6	13783
IPI:IPI00456750.2	FAM129B	Niban-like protein 1	526	56	C	UR	28235.1	20366.4	19088.9	15108.5	15123.7	17600.4
IPI:IPI00184772.6	DOCK6	Dedicator of cytokinesis protein 6	527	25	C	UR	6969.73	5185.92	5687.63	5422.33	6986.76	7637.52
IPI:IPI00183572.4	DOCK7	Isoform 2 of Dedicator of cytokinesis protein 7	527	143	C	UR	38183.9	42514	45519.8	39021.4	39116.3	41730.3
IPI:IPI00797373.4	DOCK8	Isoform 1 of Dedicator of cytokinesis protein 8	527	36	C	UR	7086.69	6176.08	6482.61	20241.1	19764.8	7740.65
IPI:IPI00024317.1	GCDH	Isoform Long of Glutaryl-CoA dehydrogenase, mitochondrial	528	75	C	UR	16154.4	14992.2	13099	14190.5	13685.9	11978.1
IPI:IPI00011454.1	GANAB	Isoform 2 of Neutral alpha-glucosidase AB	528	442	C	UR	101895	90518	111260	96180.5	85505.8	107743
IPI:IPI00383581.4	GANAB	cDNA FLJ61290, highly similar to Neutral alpha-glucosidase AB	528	11	C	UR	3533.41	3089.63	3838.27	3105.73	2592.4	3449.85
IPI:IPI00304331.2	B3GAT3	Galactosylgalactosylxylosylprotein 3-beta-glucuronosyltransferase 3	528	36	C	UR	6808.56	6064.21	7375.85	6757.15	6464.05	7625.97
IPI:IPI00059944.3	RNF25	E3 ubiquitin-protein ligase RNF25	529	30	C	UR	4775.78	5064.81	5363.92	4870.98	5594.39	6501.24
IPI:IPI00021518.1	DDB2	Isoform 1 of DNA damage-binding protein 2	530	41	C	UR	9311.23	8432.31	11816.8	11649	20225.6	11311.2
IPI:IPI00015018.1	PPA1	Inorganic pyrophosphatase	531	276	C	UR	88810.7	70258.7	71653.3	66029.5	60815.6	55741.3
IPI:IPI00301109.4	PPA2	Isoform 1 of Inorganic pyrophosphatase 2, mitochondrial	531	105	C	UR	24650.8	23717.3	24439.6	26435.7	42034.1	49125.2
IPI:IPI00025057.2	ADAR	Isoform 2 of Double-stranded RNA-specific adenosine deaminase	532	289	C	UR	62778.3	73540.8	80663.6	69635.8	77808.9	90008.9
IPI:IPI00394665.4	ADAR	Isoform 1 of Double-stranded RNA-specific adenosine deaminase	532	19	C	UR	3977.41	4455.53	5148.48	4131.51	5265.46	6936.54
IPI:IPI00149375.2	FAM160A2	Isoform 2 of UPF0518 protein FAM160A2	533	8	C	UR	2328.44	2417.79	3214.16	2597.81	2456.8	2865.37
IPI:IPI00297084.7	DDOST	Dolichyl-diphosphooligosaccharide--protein glycosyltransferase 48 kDa subunit	534	108	C	UR	25285.6	22740.3	25237.6	21992.8	24748.1	27769.3
IPI:IPI00303343.7	SCAF1	Splicing factor, arginine/serine-rich 19	535	42	C	UR	9144.75	9152.4	10045.2	9107.19	10423.8	10898.6
IPI:IPI00001813.5	PHRF1	Isoform 1 of PHD and RING finger domain-containing protein 1	535	27	C	UR	7099.5	6959.68	8417.52	9093.03	9675.92	9685.46
IPI:IPI00004358.4	PYGB	Glycogen phosphorylase, brain form	536	189	C	UR	56319.2	50389.5	37537.5	39448.2	38689.1	42991.9
IPI:IPI00783313.2	PYGL	Glycogen phosphorylase, liver form	536	32	C	UR	6161.74	8789.15	10765.1	8531.56	8096.2	12045.7
IPI:IPI00030356.4	MCL1	Isoform 1 of Induced myeloid leukemia cell differentiation protein Mcl-1	537	2	C	UR	1024.23	482.978	382.478	313.104	480.877	503.773
IPI:IPI00022460.2	ZNF592	Zinc finger protein 592	538	17	C	UR	3768.54	3639.54	3835.87	3417.2	3952.78	4728.84
IPI:IPI00478085.3	MEX3D	Isoform 1 of RNA-binding protein MEX3D	539	9	C	UR	1937.1	1756.57	2125.79	1980.18	1904.81	2314.1
IPI:IPI00385217.6	MEX3A	RNA-binding protein MEX3A	539	29	C	UR	6813.22	8317.14	8403.83	7796.31	10440.6	10551.2
IPI:IPI00790901.2	MEX3C	RNA-binding protein MEX3C	539	4	C	UR	624.404	930.438	769.664	1182.51	1277.36	1171.09
IPI:IPI00171127.1	UBAP2	Ubiquitin-associated protein 2	540	73	C	UR	14030.4	13451.6	17683.9	27390.2	19662.1	17585.3
IPI:IPI00478960.3	UBAP2	cDNA FLJ61633, highly similar to Homo sapiens ubiquitin associated protein 2 (UBAP2), transcript variant 1, mRNA	540	6	C	UR	1072.9	964.548	1935.59	1824.96	1603.63	1739.54
IPI:IPI00413318.4	PRKAG1	5'-AMP-activated protein kinase subunit gamma-1	541	37	C	UR	10102.5	10296.1	11606.9	11280.2	12662.9	11978.7
IPI:IPI00000001.2	STAU1	Isoform Long of Double-stranded RNA-binding protein Staufen homolog 1	542	118	C	UR	45584	35544.7	36108.6	32929	36288.9	42606.5
IPI:IPI00643664.1	STAU1	staufen isoform c	542	2	C	UR	313.355	252.397	296.475	291.602	313.714	390.18
IPI:IPI00164481.2	STAU2	Isoform 2 of Double-stranded RNA-binding protein Staufen homolog 2	542	74	C	UR	19124	26819.4	21290.6	27053.8	24810.8	22588.9
IPI:IPI00640881.1	STAU2	Isoform 3 of Double-stranded RNA-binding protein Staufen homolog 2	542	3	C	UR	105.454	157.669	126.564	201.838	170.144	148.227
IPI:IPI00015985.1	GAS2L1	Isoform 3 of GAS2-like protein 1	543	1	C	UR	113.54	108.695	151.98	86.5951	55.4653	62.9174
IPI:IPI00004970.4	UTP20;LOC653877	Small subunit processome component 20 homolog	544	147	C	UR	30669.1	37098.8	44184.4	38395.7	37376.8	31922.2
IPI:IPI00023098.1	FOXP1	Isoform 1 of Forkhead box protein P1	545	9	C	UR	1452.03	1499.75	1836.08	1563.3	1970.7	2084.6
IPI:IPI00790232.1	FOXP1	18 kDa protein	545	1	C	UR	193.039	284.497	369.616	304.35	264.055	298.906
IPI:IPI00395554.4	FOXP4	Forkhead box protein P4	545	12	C	UR	3395.95	3096.29	3626.25	3324.29	3298.77	3728.68
IPI:IPI00305698.2	GGCX	Vitamin K-dependent gamma-carboxylase	546	13	C	UR	4454.5	3935.94	3591.24	3074.91	3334.96	3457.15
IPI:IPI00007673.4	CHCHD2	Coiled-coil-helix-coiled-coil-helix domain-containing protein 2, mitochondrial	547	36	C	UR	8148.09	5827.2	3475.33	4531.86	4377.21	3975.14
IPI:IPI00641582.1	BAG3	BAG family molecular chaperone regulator 3	548	31	C	UR	6854.27	12432.4	12070.6	7273.97	3885.14	4614.56
IPI:IPI00639961.2	BAG3	35 kDa protein	548	32	C	UR	4875.6	8357.81	8252.66	5273.73	3556.77	4086.74
IPI:IPI00305092.7	WIBG	Isoform 1 of Partner of Y14 and mago	549	46	C	UR	12356.9	10685.8	9836.83	10933.4	11734.7	11632.5
IPI:IPI00333776.6	NRCAM	Isoform 1 of Neuronal cell adhesion molecule	550	26	C	UR	3481.4	3388.34	12416	8826.47	4392.91	4630.92
IPI:IPI00063434.2	PHF23	Isoform 1 of PHD finger protein 23	551	18	C	UR	4964.77	5973.92	5234.06	4473.98	5894.01	5970.48
IPI:IPI00375452.2	SLC19A1	Folate transporter 1	552	7	C	UR	1709.84	1448.35	2439.8	1809.73	1664.66	1365.07
IPI:IPI00012439.5	HDAC10	Isoform 1 of Histone deacetylase 10	553	4	C	UR	790.251	609.312	825.151	931.242	796.113	903.69
IPI:IPI00061142.3	NUS1	Nogo-B receptor	554	3	C	UR	517.14	408.075	363.226	339.3	323.108	387.239
IPI:IPI00301489.3	UROD	Uroporphyrinogen decarboxylase	555	48	C	UR	12489.2	14036.4	12927.9	10504.7	11417.1	12561.4
IPI:IPI00220289.7	CHD6	Isoform 1 of Chromodomain-helicase-DNA-binding protein 6	556	35	C	UR	11561	7353.85	8043.13	9572.52	9551.53	9918.86
IPI:IPI00398992.6	CHD8	Isoform 1 of Chromodomain-helicase-DNA-binding protein 8	556	84	C	UR	18808.2	21997.9	24335.4	26419.7	26611.7	26142.8
IPI:IPI00383105.5	CHD9	Isoform 1 of Chromodomain-helicase-DNA-binding protein 9	556	25	C	UR	7775.8	7922.13	10699	8450.54	8522.58	8761.1
IPI:IPI00794880.1	CHD7	Isoform 1 of Chromodomain-helicase-DNA-binding protein 7	556	21	C	UR	3813.26	5865.6	4849.53	6669.89	6137.05	6013.44
IPI:IPI00783946.1	CYP2U1	Isoform 1 of Cytochrome P450 2U1	556	2	C	UR	545.061	635.061	716.408	879.651	867.671	745.976
##IPI:IPI00478741.2	TDRD7	Tudor domain-containing protein 7	556	4	C	UR	1885.76	1132.46	1228.93	1268.68	1948.87	3217.04
IPI:IPI00182304.6	TYW1	Isoform 1 of tRNA wybutosine-synthesizing protein 1 homolog	557	8	C	UR	3486.08	3308.33	3351.95	3073.2	3141.63	3211.5
IPI:IPI00301503.8	TRA2B	Isoform 1 of Transformer-2 protein homolog beta	558	93	C	UR	16982.6	17391.2	19325.2	19520	19366	20938.9
IPI:IPI00013891.1	TRA2A	Isoform Long of Transformer-2 protein homolog alpha	558	63	C	UR	10334.8	9805.14	11657.5	11152.3	12158.7	11318.1
IPI:IPI00736558.3	THAP4	THAP domain containing 4	559	8	C	UR	2106.09	2650.75	2685.79	2355.44	2646.6	2947.48
IPI:IPI00796333.1	ALDOA	45 kDa protein	560	708	C	UR	140638	147090	148034	120807	111021	127385
IPI:IPI00418262.5	ALDOC	Fructose-bisphosphate aldolase	560	146	C	UR	23588.4	26066.4	28796.2	28892.1	25539.5	28473.7
IPI:IPI00549566.4	RARS2	Probable arginyl-tRNA synthetase, mitochondrial	561	30	C	UR	10297	9410.27	10287.8	7850.9	8294.63	9518.74
IPI:IPI00219352.4	CBS	Isoform 1 of Cystathionine beta-synthase	562	106	C	UR	24031.9	22964.4	27407.8	24385.2	36749.7	45585.8
IPI:IPI00816415.1	AKAP2;PALM2-AKAP2;PALM2	PALM2-AKAP2 protein isoform 2	563	67	C	UR	19386.4	15942.9	14944.1	33159.5	22371.1	13690.8
IPI:IPI00073769.2	PALM2;AKAP2	A kinase (PRKA) anchor protein 2	563	8	C	UR	3330.36	3625.92	3116.01	1560.03	3533.84	3976.67
IPI:IPI00301023.5	PALM	Isoform 1 of Paralemmin	563	23	C	UR	4434.91	10637	8493.8	3876.13	10605.1	12790
IPI:IPI00301346.3	POLR3B	DNA-directed RNA polymerase III subunit RPC2	564	38	C	UR	10917.3	13822.7	13592.4	15725.5	14896.3	10628.2
IPI:IPI00028412.1	SSSCA1	Sjoegren syndrome/scleroderma autoantigen 1	565	46	C	UR	9246.25	8107.73	8579.45	8506.64	6495.65	7245.91
IPI:IPI00396008.3	SPTY2D1	Isoform 1 of Protein SPT2 homolog	566	31	C	UR	6488.13	6179.74	6750.03	8525.4	7481.61	6863.2
IPI:IPI00101186.6	RRP12	Isoform 1 of RRP12-like protein	567	80	C	UR	18920	17419	22918.4	23543.4	19521.6	15615.1
IPI:IPI00297572.5	AQR	Intron-binding protein aquarius	567	102	C	UR	27140.1	25971.1	27908.6	30924.7	33430.9	32981.8
IPI:IPI00328319.8	RBBP4	Histone-binding protein RBBP4	567	186	C	UR	34805	43702	40876	52096	49563.9	40367.8
IPI:IPI00877934.1	RBBP4	retinoblastoma binding protein 4 isoform b	567	1	C	UR	234.654	330.427	583.938	582.326	263.781	256.237
IPI:IPI00395865.4	RBBP7	Histone-binding protein RBBP7	567	64	C	UR	17501.1	14288.2	12534.2	15339.6	15923.2	16343.4
IPI:IPI00646512.1	RBBP7	cDNA FLJ34592 fis, clone KIDNE2008987, highly similar to Histone-binding protein RBBP7	567	2	C	UR	1126.8	865.576	912.463	835.58	1031.65	1146.43
IPI:IPI00071697.1	NFYC	Isoform 3 of Nuclear transcription factor Y subunit gamma	568	23	C	UR	6422.92	5861.5	6200.84	8486.47	7321.54	7419.34
IPI:IPI00032875.1	ETFDH	Isoform 1 of Electron transfer flavoprotein-ubiquinone oxidoreductase, mitochondrial	569	41	C	UR	11763.3	10272.3	11404.8	10372.4	11357.1	11237.4
IPI:IPI00375330.6	WAPAL	Isoform 1 of Wings apart-like protein homolog	570	93	C	UR	26061.4	22378.6	24256.5	32094.5	30309.8	28022.7
IPI:IPI00400875.2	USP6NL	USP6 N-terminal like isoform 2	570	8	C	UR	958.233	1021.96	1207.97	1023.23	950.327	1020.87
IPI:IPI00018246.5	HK1	Isoform 1 of Hexokinase-1	571	200	C	UR	78152.1	64417.1	67251.2	55623.5	46935.9	53215.4
IPI:IPI00102864.3	HK2	Hexokinase-2	571	119	C	UR	48503.5	40743.2	36364.9	35606	34245.5	30146.9
IPI:IPI00296922.4	LAMB2	Laminin subunit beta-2	572	8	C	UR	2324.63	1739.31	1520.63	1397.36	1934.71	2115.72
IPI:IPI00015911.1	DLD	Dihydrolipoyl dehydrogenase, mitochondrial	573	105	C	UR	30180.8	24978.3	26488.2	27357.8	32939.2	20077.8
IPI:IPI00909143.1	DLD	Dihydrolipoyl dehydrogenase	573	4	C	UR	1167.29	681.088	786.669	699.916	959.35	764.654
IPI:IPI00006130.3	KIAA0494	EF-hand domain-containing protein KIAA0494	574	6	C	UR	1890.14	1573.84	1160.4	955.202	1285.47	1340.92
IPI:IPI00470649.3	NCLN	Isoform 1 of Nicalin	575	48	C	UR	9527.25	8886.33	11574.8	9592.9	12182.6	14909.5
IPI:IPI00010821.1	SH2B3	SH2B adapter protein 3	576	4	C	UR	808.553	791.987	932.249	910.764	741.723	1283.32
IPI:IPI00299263.5	ARFGAP3	ADP-ribosylation factor GTPase-activating protein 3	577	55	C	UR	20814.9	15403	17546.5	15373	14599.9	14389.4
IPI:IPI00877805.1	ARFGAP3	ADP-ribosylation factor GTPase activating protein 3	577	1	C	UR	144.903	430.224	249.084	461.62	330.391	116.267
IPI:IPI00879742.2	ARFGAP3	cDNA FLJ55728, highly similar to ADP-ribosylation factor GTPase-activating protein 3	577	6	C	UR	3232.83	2153.77	2710.62	2103.5	2350.26	2478.7
IPI:IPI00004290.3	C1orf107	Digestive organ expansion factor homolog	578	17	C	UR	6323.82	5906.56	5760.71	5216.8	5623.06	6493.42
IPI:IPI00297322.3	ARFGAP2	ADP-ribosylation factor GTPase-activating protein 2	579	61	C	UR	20052.9	14641.7	23853.6	19526.2	15461	14990.1
IPI:IPI00027252.6	PHB2	Prohibitin-2	580	143	C	UR	27765.9	36938.9	47492.9	31893.2	40671.4	38010.2
IPI:IPI00013976.3	LAMB1	Laminin subunit beta-1	581	66	C	UR	17580.6	26570	27514.8	20375.9	20809.5	24887
IPI:IPI00009032.1	SSB	Lupus La protein	582	262	C	UR	79214	101002	98087.3	78069.4	74439.6	68380.8
IPI:IPI00059764.4	ZNF428	Isoform 1 of Zinc finger protein 428	583	6	C	UR	1248.93	1145.79	1178.3	1999.3	1339.97	1549.57
IPI:IPI00217544.4	ERG	Isoform 5 of Transcriptional regulator ERG	584	12	C	UR	2138.37	2426.57	2475.96	5719.1	4765.25	3011.06
IPI:IPI00217470.1	FLI1	Isoform 2 of Friend leukemia integration 1 transcription factor	584	13	C	UR	2013.44	3135.95	3381.01	3435.41	3117.49	2401.16
IPI:IPI00183400.8	CSNK1A1	Isoform 1 of Casein kinase I isoform alpha	585	55	C	UR	16587.1	12822	13409.6	12813.8	13398.8	14270.1
IPI:IPI00916394.1	RAD54L2	SNF2-related domain containing protein	586	23	C	UR	5065.11	4592.47	4837.19	7620.77	7314.37	6612.37
IPI:IPI00001885.1	SNX8	Sorting nexin-8	587	12	C	UR	4111.47	4485.14	4058.25	3380.43	2494.61	3284.32
IPI:IPI00384176.1	PBRM1	Isoform 1 of Protein polybromo-1	588	154	C	UR	40485.6	37881.3	47477.5	70198	70567.4	50702.9
IPI:IPI00013302.1	ADAM15	Disintegrin and metalloproteinase domain-containing protein 15	589	6	C	UR	2072.34	1424.18	1101.53	962.343	1228.61	1319.72
IPI:IPI00103595.2	CEP350	Centrosome-associated protein 350	590	42	C	UR	9168.86	7692.92	7413.83	7867.46	9794.65	11026.1
IPI:IPI00061356.3	CCDC99	Isoform 1 of Coiled-coil domain-containing protein 99	591	37	C	UR	9132.53	7995.34	7619.09	8312.54	9317.83	10206.7
IPI:IPI00178116.2	MBNL1	muscleblind-like 1 isoform e	592	6	C	UR	447.594	506.16	613.476	901.334	875.366	462.615
IPI:IPI00021692.2	MBNL1	Isoform EXP42 of Muscleblind-like protein 1	592	41	C	UR	6908.14	6008.67	6036.24	9355.23	7439.59	6354.37
IPI:IPI00183078.8	MBNL2	Isoform 2 of Muscleblind-like protein 2	592	5	C	UR	1748.39	1544.04	464.176	476.726	940.039	1105.9
IPI:IPI00020062.2	MBNL3	Isoform 1 of Muscleblind-like protein 3	592	12	C	UR	2030.07	1713.01	1554.29	2150.18	2422.11	2031.23
IPI:IPI00006907.1	C12orf5	Probable fructose-2,6-bisphosphatase TIGAR	593	32	C	UR	8412.16	10226.5	11489.4	8305.72	11001.1	9581
IPI:IPI00414657.4	CHTF18	Isoform 2 of Chromosome transmission fidelity protein 18 homolog	594	24	C	UR	3458.74	3666.31	4854.58	5195.82	4990.62	4461.42
IPI:IPI00152434.1	PHOSPHO1	Phosphoethanolamine/phosphocholine phosphatase	594	24	C	UR	4034.99	13992.1	12991.8	8981.14	4943.04	5842.45
IPI:IPI00012079.3	EIF4B	cDNA FLJ54492, highly similar to Eukaryotic translation initiation factor 4B	595	262	C	UR	45126.1	59790.2	64339.8	57016	47144	48267.8
IPI:IPI00887748.1	LOC100129692	similar to hCG1793972	595	5	C	UR	753.736	551.063	482.775	421.175	411.694	408.871
IPI:IPI00908588.1	-	cDNA FLJ59206, highly similar to Eukaryotic translation initiation factor 4B	595	1	C	UR	109.643	887.257	658.818	90.1102	101.378	100.257
IPI:IPI00549516.3	TOE1	Target of EGR1 protein 1	596	37	C	UR	11796.5	11482.6	12443.6	12381	12847.1	14065.9
IPI:IPI00021537.5	OGFR	Isoform 1 of Opioid growth factor receptor	597	48	C	UR	11225	9785.27	9971.2	12310.6	11247.8	8899.04
IPI:IPI00024705.1	GIPC1	PDZ domain-containing protein GIPC1	597	48	C	UR	16867.6	13659.3	6785.08	6258.81	7639.87	8496.22
IPI:IPI00396203.6	TBCD	Isoform 1 of Tubulin-specific chaperone D	598	77	C	UR	19527.8	22572.9	20818.1	20399	26211.4	30625.3
IPI:IPI00014197.2	CDV3	Isoform 1 of Protein CDV3 homolog	599	104	C	UR	30740.6	23295.9	20168.1	28593.3	20031.2	20718.8
IPI:IPI00010349.1	AGPS	Alkyldihydroxyacetonephosphate synthase, peroxisomal	600	118	C	UR	28766.8	25511.7	23771.8	31553.5	32638.2	37301.2
IPI:IPI00059366.4	H2AFY	H2A histone family, member Y isoform 2	601	190	C	UR	42575.2	37688.5	35183.8	55526.7	61296.6	60487.3
IPI:IPI00220994.3	H2AFY2	Core histone macro-H2A.2	601	141	C	UR	18886.7	47232.9	52420.6	38520.7	28598.4	35603.7
IPI:IPI00010415.2	ACOT7	Isoform 1 of Cytosolic acyl coenzyme A thioester hydrolase	602	206	C	UR	34761	45523.5	47887.2	45382.1	45312.4	40849.1
IPI:IPI00554752.3	PRKAR2B	cAMP-dependent protein kinase type II-beta regulatory subunit	603	26	C	UR	7276.2	6320.84	4374.35	5245.73	7616.92	8377.75
IPI:IPI00063234.1	PRKAR2A	Protein kinase, cAMP-dependent, regulatory, type II, alpha, isoform CRA_b	603	76	C	UR	28120.7	23321.6	19853.9	18286.3	25403.5	29477.6
IPI:IPI00027492.1	GCH1	Isoform GCH-1 of GTP cyclohydrolase 1	604	4	C	UR	640.781	597.558	806.781	1634.68	1936.09	981.031
IPI:IPI00029705.2	TUBGCP2	Gamma-tubulin complex component 2	605	80	C	UR	24908.5	20199.7	21361.5	26051.7	25900.9	27563.6
IPI:IPI00019471.1	IRS1	Insulin receptor substrate 1	606	11	C	UR	992.148	1956.11	1523.37	1157.88	1015.27	1107.72
IPI:IPI00045360.4	CIC	Protein capicua homolog	607	13	C	UR	3286.65	2807.39	2934.25	2563.52	2587.99	2888.55
IPI:IPI00007257.4	CLSTN1	Isoform 2 of Calsyntenin-1 (Fragment)	608	8	C	UR	2132.2	1856.95	1721.27	1719.7	1832.27	1944.57
IPI:IPI00377267.1	PARP9	Isoform 2 of Poly [ADP-ribose] polymerase 9	609	43	C	UR	13602.2	11740	13410.5	16219	17709.4	20107.1
IPI:IPI00013232.1	IKZF1	Isoform Ik1 of DNA-binding protein Ikaros	610	20	C	UR	2610.67	2781.61	2992.75	20338.8	16978.8	5512.52
IPI:IPI00216387.1	IKZF1	Isoform Ik2 of DNA-binding protein Ikaros	610	1	C	UR	32.8745	26.9258	87.2185	786.655	294.654	63.8249
IPI:IPI00007757.2	IKZF2	Isoform 1 of Zinc finger protein Helios	610	15	C	UR	3333.5	4130.29	3950.59	6239.24	5988.58	3032.37
IPI:IPI00018923.2	IKZF3	Isoform 1 of Zinc finger protein Aiolos	610	3	C	UR	611.507	575.237	622.998	1560.93	1597.31	707.657
IPI:IPI00465123.6	KIAA0415	KIAA0415 gene product	611	26	C	UR	7112.34	5858.21	6856.7	6118.89	6952.16	6882.31
IPI:IPI00556645.3	FOXK1	Isoform 1 of Forkhead box protein K1	611	11	C	UR	3116.98	2720.88	2661.79	2475.72	2728.42	3213
IPI:IPI00006029.2	FOXK2	Isoform 1 of Forkhead box protein K2	611	36	C	UR	7577.9	10598.2	10991.8	11418.2	11533.4	11118.6
IPI:IPI00384972.3	KIAA1267	Isoform 1 of Uncharacterized protein KIAA1267	612	19	C	UR	4864.97	4581.47	5003.41	6262.93	6002.4	4932.83
IPI:IPI00030531.4	SLMAP	Isoform 3 of Sarcolemmal membrane-associated protein	613	33	C	UR	13638.7	10175.8	9582.53	11409.3	13556.8	14697.2
IPI:IPI00182469.3	CTNND1	Isoform 1AB of Catenin delta-1	614	166	C	UR	50673.5	37507.4	43441.8	33475.4	41477.2	39823.6
IPI:IPI00884375.2	FAM21B	Protein FAM21B	615	24	C	UR	5481.86	5749.51	5824.14	5487.04	4566.26	5257.94
IPI:IPI00456853.3	FAM21C	Isoform 2 of Protein FAM21C	615	63	C	UR	15386.6	17776.2	17982.7	17053.6	14224.5	14126.9
IPI:IPI00793199.1	ANXA4	annexin IV	616	93	C	UR	37270.3	32552.1	14424.5	19341.2	37928	50158.2
IPI:IPI00329801.1	ANXA5	Annexin A5	616	314	C	UR	66308.8	63190.6	76442.7	66375.6	51304.3	62065.4
IPI:IPI00301364.3	SKP1	Isoform 1 of S-phase kinase-associated protein 1	616	150	C	UR	34124	32325.6	32914.2	30257.6	29436.3	29149.7
IPI:IPI00304071.4	ACSF2	Acyl-CoA synthetase family member 2, mitochondrial	617	28	C	UR	18324.6	14652.4	5326.71	8824.96	8930.32	8501.03
IPI:IPI00030351.2	DLG1	Isoform 1 of Disks large homolog 1	618	71	C	UR	20555.8	18942.6	19028.4	16164	20713.7	23996.2
IPI:IPI00444727.3	DLG2	Isoform 1 of Disks large homolog 2	618	17	C	UR	2185.67	5360.4	8808.21	5529.21	2502.17	2621.86
IPI:IPI00647338.1	DLG3	Isoform 2 of Disks large homolog 3	618	26	C	UR	4956.79	4616.75	4468.42	4887.55	6464.9	7728.35
IPI:IPI00291783.3	GEMIN5	Gem-associated protein 5	619	183	C	UR	49157	54521.9	54605.5	53302.1	50727.9	48116.4
IPI:IPI00748360.2	KIAA1797	Uncharacterized protein KIAA1797	620	26	C	UR	7157.29	9159.5	9716.3	9577.4	8800.94	8866.2
IPI:IPI00419263.3	PECI	Peroxisomal 3,2-trans-enoyl-CoA isomerase	621	87	C	UR	15097.5	17411.2	18472.5	18723.1	19243.2	19929.2
IPI:IPI00063635.1	CSRP2BP	Isoform 1 of Cysteine-rich protein 2-binding protein	622	12	C	UR	3287.09	3315.76	3443.65	3725.56	3974.09	4632.48
IPI:IPI00796669.1	CSRP2BP	cDNA FLJ57852, highly similar to Cysteine-rich protein 2-binding protein	622	1	C	UR	175.661	253.767	253.342	353.311	348.999	314.361
IPI:IPI00657706.1	MBOAT7	Isoform 1 of Lysophospholipid acyltransferase 7	623	18	C	UR	5614.28	5467.61	6426.3	4778.84	5312.37	7450.58
IPI:IPI00297325.3	SDHD	Succinate dehydrogenase [ubiquinone] cytochrome b small subunit, mitochondrial	624	1	C	UR	224.225	128.453	161.824	145.371	196.367	275.745
IPI:IPI00876962.2	INF2	Isoform 2 of Inverted formin-2	625	79	C	UR	24291.9	19247.6	18843.3	14844	15877.7	18504.6
IPI:IPI00020999.6	ENPP3	Ectonucleotide pyrophosphatase/phosphodiesterase family member 3	625	3	C	UR	1849.63	1298.96	1103.68	922.734	1033.24	1179.31
IPI:IPI00852669.1	ZNF516	Zinc finger protein 516	626	30	C	UR	5799.95	7645.27	8096.34	6255.67	8624.89	9323.43
IPI:IPI00296141.4	DPP7	Dipeptidyl-peptidase 2	627	23	C	UR	5287.66	6319.3	6664.33	5541.68	8222.78	9559.53
IPI:IPI00025252.1	PDIA3	Protein disulfide-isomerase A3	628	339	C	UR	89235.3	84510.9	96299.3	67798.9	103764	126702
IPI:IPI00893541.1	PDIA3	14 kDa protein	628	17	C	UR	2566.12	2317.45	2537.87	1818.21	2707.89	3296.79
IPI:IPI00015488.3	SLC4A11	Isoform 1 of Sodium bicarbonate transporter-like protein 11	628	2	C	UR	1779.73	1164.59	1017.13	693.403	1045.51	1261.72
IPI:IPI00852749.1	TTC9	Tetratricopeptide repeat protein 9A	629	5	C	UR	2166.76	1750.28	1402.05	1310.16	2068.64	2416.46
IPI:IPI00023636.3	MAP2K7	Isoform 1 of Dual specificity mitogen-activated protein kinase kinase 7	629	23	C	UR	6258.23	6639.77	7256.56	5638.12	7213.68	7914.42
IPI:IPI00294701.1	MNAT1	CDK-activating kinase assembly factor MAT1	630	19	C	UR	6023.67	6391.12	6900.71	6835.25	6194.68	6640.54
IPI:IPI00176702.4	KIAA1543	Uncharacterized protein KIAA1543	631	25	C	UR	10919.6	9247.96	6126.4	5152.17	8574.38	10146
IPI:IPI00170979.1	EVL	Isoform 2 of Ena/VASP-like protein	632	58	C	UR	7054.57	6923.85	8066.57	37786	34564.6	9188.8
IPI:IPI00218850.5	SCAMP2	Secretory carrier-associated membrane protein 2	633	9	C	UR	1716.6	1838.12	2323.85	2066.68	1706.59	1872.08
IPI:IPI00024568.2	GLTSCR1	Isoform 1 of Glioma tumor suppressor candidate region gene 1 protein	634	14	C	UR	2534.3	2780.58	3308.39	2923.5	3342.07	3656.25
IPI:IPI00465008.5	KIAA0240	Uncharacterized protein KIAA0240	634	1	C	UR	77.0426	49.7942	61.5543	51.3452	78.593	49.4646
IPI:IPI00030572.5	TNRC6C	Isoform 1 of Trinucleotide repeat-containing gene 6C protein	635	18	C	UR	2882.78	3125.25	3360.72	4461.28	3421.16	3931.12
IPI:IPI00160265.1	TNRC6A	Isoform 2 of Trinucleotide repeat-containing gene 6A protein	635	16	C	UR	2315.9	4274.49	4142.17	2665.65	2617.43	2824.68
IPI:IPI00030247.1	CCNT1	Cyclin-T1	636	34	C	UR	7084.09	11580.9	10047.7	9284.14	9180.14	9782.2
IPI:IPI00030313.2	CCNT2	Isoform B of Cyclin-T2	636	5	C	UR	1146.94	1334.25	1243.52	951.672	1264.78	1453.45
IPI:IPI00021954.1	GBF1	Golgi-specific brefeldin A-resistance guanine nucleotide exchange factor 1	637	87	C	UR	17857	19071.5	25129.5	21773.9	21272.4	22004.5
IPI:IPI00414676.6	HSP90AB1	Heat shock protein HSP 90-beta	637	757	C	UR	162811	148301	169759	176817	192136	151051
IPI:IPI00382470.3	HSP90AA1	heat shock 90kDa protein 1, alpha isoform 1	637	2376	C	UR	459057	462334	504257	553735	565958	515348
IPI:IPI00030275.5	TRAP1	Heat shock protein 75 kDa, mitochondrial	637	310	C	UR	67931.6	88824.4	102943	81001.9	61843.5	63576.6
IPI:IPI00550192.2	XPNPEP3	Isoform 1 of Probable Xaa-Pro aminopeptidase 3	637	29	C	UR	7488.46	6442.82	6386.34	5266.43	5983.73	5758.88
IPI:IPI00027230.3	HSP90B1	Endoplasmin	637	862	C	UR	172441	206639	229877	161563	190700	228174
IPI:IPI00555957.1	HSP90AA4P	Putative heat shock protein HSP 90-alpha A4	637	1	C	UR	406.634	279.321	272.364	324.493	362.619	313.787
IPI:IPI00026320.1	UBR5	E3 ubiquitin-protein ligase UBR5	638	160	C	UR	44526.9	40843.1	42817.8	50256.2	50625.2	46659.1
IPI:IPI00219538.3	POLB	DNA polymerase beta	639	36	C	UR	9458.65	10889.8	10798.6	11740.6	14224.4	13575.9
IPI:IPI00022648.2	EIF5	Eukaryotic translation initiation factor 5	640	107	C	UR	36186.9	24690.5	20975.2	25673.9	23311.2	24541.4
IPI:IPI00335085.5	RNF123	Isoform 1 of E3 ubiquitin-protein ligase RNF123	640	11	C	UR	3512.55	3152.77	3361.96	3690.41	4164.44	4787.23
IPI:IPI00396010.3	RABGAP1L	Isoform 1 of RAB GTPase-activating protein 1-like	640	17	C	UR	6317.93	6641.49	5936.41	5383.61	9354.25	9713.65
IPI:IPI00016702.4	RABGAP1	Isoform 1 of Rab GTPase-activating protein 1	640	68	C	UR	19117.7	27632.9	21820.3	16414.5	19857.4	21922.7
IPI:IPI00006648.4	RABGAP1L	Isoform 7 of RAB GTPase-activating protein 1-like	640	28	C	UR	10575	10059.1	9379.23	7786.9	14065.8	14826.9
IPI:IPI00299554.3	KIF14	Kinesin-like protein KIF14	641	74	C	UR	20948.9	31461.9	21164.7	16214.1	25511.7	27225.6
IPI:IPI00385712.3	TTF1	Transcription termination factor 1	642	18	C	UR	5897.81	6343.25	7219.9	7847.95	8324.21	6946.96
IPI:IPI00099463.2	SGPL1	Sphingosine-1-phosphate lyase 1	643	47	C	UR	17299.6	14886.3	15125.8	12657.9	16316.1	20257.3
IPI:IPI00028931.2	DSG2	Desmoglein-2	644	75	C	UR	30825.9	23758.1	12596.1	13506.5	43592.4	38315.4
IPI:IPI00294536.2	STRAP	cDNA FLJ51909, highly similar to Serine-threonine kinase receptor-associatedprotein	645	210	C	UR	51233.1	65160.2	61293.9	50762.4	50516.5	49406.4
IPI:IPI00099311.3	TRMT6	Isoform 1 of tRNA (adenine-N(1)-)-methyltransferase non-catalytic subunit TRM6	646	56	C	UR	19866.1	17064.8	18380.4	20606.5	19650.1	15522.1
IPI:IPI00297351.2	SOCS6	Suppressor of cytokine signaling 6	646	1	C	UR	463.979	521.664	504.912	450.961	466.578	505.921
IPI:IPI00041959.5	PHF21A	Isoform 2 of PHD finger protein 21A	647	17	C	UR	4354.28	5245.41	4999.64	4040.97	4615.67	5178.69
IPI:IPI00651721.1	AZI1	Isoform 2 of 5-azacytidine-induced protein 1	648	87	C	UR	23877.6	21859.5	24475.6	26258.6	28277.4	29585.6
IPI:IPI00438229.2	TRIM28	Isoform 1 of Transcription intermediary factor 1-beta	649	568	C	UR	108423	103173	108299	126919	132917	115788
IPI:IPI00002220.4	SAP130	Sin3A-associated protein, 130kDa isoform a	650	35	C	UR	8329.07	7297.66	7223.96	8612.93	8210.15	8612.83
IPI:IPI00439948.6	PPP1R13L	Isoform 1 of RelA-associated inhibitor	651	34	C	UR	22602.2	17032.1	7285.33	6664.39	8810.92	9351.15
IPI:IPI00295457.6	MPRIP	Isoform 2 of Myosin phosphatase Rho-interacting protein	652	65	C	UR	21761.7	17995.4	23484.3	19517.3	19263.3	25253.2
IPI:IPI00797766.1	MPRIP	KIAA0864 protein	652	11	C	UR	2686.34	2658.23	2582.26	2587.39	2467.25	2390.09
IPI:IPI00002938.1	ABT1	Activator of basal transcription 1	653	18	C	UR	5597.5	5352.04	6191.63	6733.41	6972.21	5873.36
IPI:IPI00167762.2	C19orf47	Isoform 1 of Uncharacterized protein C19orf47	654	13	C	UR	4289.36	4443.28	5046.05	5473.32	5566.74	5440.98
IPI:IPI00844249.1	GPAM	Glycerol-3-phosphate acyltransferase 1, mitochondrial	655	6	C	UR	1104.16	1051.88	1204.56	1155.85	1076.95	1160.71
IPI:IPI00333068.4	ARPC1A	Actin-related protein 2/3 complex subunit 1A	656	56	C	UR	11145.9	18049.6	22280.5	18272.2	21406	26120
IPI:IPI00005160.3	ARPC1B	Actin-related protein 2/3 complex subunit 1B	656	59	C	UR	24404.4	18177.2	15448.3	22599.5	21561.9	15695.3
IPI:IPI00005780.3	OGT	Isoform 3 of UDP-N-acetylglucosamine--peptide N-acetylglucosaminyltransferase 110 kDa subunit	657	88	C	UR	23950.7	22006.2	21975.9	21849.1	23869.8	24081.4
IPI:IPI00784044.1	MCCC2	Isoform 1 of Methylcrotonoyl-CoA carboxylase beta chain, mitochondrial	658	63	C	UR	23614.8	20533.7	23222	14989.1	18621.8	23417.7
IPI:IPI00880048.1	DIS3L2	Isoform 1 of DIS3-like exonuclease 2	659	45	C	UR	11227.5	13988.3	15520.7	15133.6	14975.8	15061.5
IPI:IPI00328172.1	TTC26	Tetratricopeptide repeat protein 26	660	9	C	UR	2337.21	2443.5	2477.68	2610.66	2634.66	2334.09
IPI:IPI00401900.1	KIAA0907	Isoform 1 of UPF0469 protein KIAA0907	661	20	C	UR	3341.55	3276.52	3260.92	3231.25	3199.7	3701.57
IPI:IPI00376221.2	EPB41L5	Isoform 1 of Band 4.1-like protein 5	662	24	C	UR	5383.08	5447.48	5358.67	4478.52	4737.85	5666.14
IPI:IPI00237884.3	AKAP12	Isoform 1 of A-kinase anchor protein 12	663	166	C	UR	19228.1	66814	61991.6	48400.1	33992.6	36488
IPI:IPI00299507.6	NCAPH	Condensin complex subunit 2	664	96	C	UR	21552.9	26332.5	25858.3	22695.1	22383.4	23621.7
IPI:IPI00301647.4	GLE1	Isoform 1 of Nucleoporin GLE1	665	32	C	UR	6612.63	6707.32	7452.73	6615.33	7211.02	6870.18
IPI:IPI00032140.4	SERPINH1	Serpin H1	666	236	C	UR	27595.4	90655.7	105887	50708.6	26655.8	34116
IPI:IPI00291939.1	SMC1A	Structural maintenance of chromosomes protein 1A	667	385	C	UR	93956.1	88009.5	111243	144179	140456	126374
IPI:IPI00007277.2	LRRFIP2	Isoform 1 of Leucine-rich repeat flightless-interacting protein 2	667	27	C	UR	10307.1	8208.08	10189	9449.18	9340.27	9750.72
IPI:IPI00382733.2	LRRFIP1	Isoform 3 of Leucine-rich repeat flightless-interacting protein 1	667	100	C	UR	42827.3	33651.3	28088.5	32432.3	26648.2	23355.6
IPI:IPI00386687.3	LRRFIP1	leucine rich repeat (in FLII) interacting protein 1 isoform 1	667	4	C	UR	1359.65	1593.35	1443.34	949.638	1356.45	1333.82
IPI:IPI00303812.7	C9orf82	Uncharacterized protein C9orf82	668	19	C	UR	4502.61	4594.88	4492.86	6993.18	6450.97	5394.15
IPI:IPI00028005.1	NUP107	Nuclear pore complex protein Nup107	669	91	C	UR	21312.2	22759.4	24495.7	23099.6	25201.3	25692.7
IPI:IPI00100193.4	FLJ11506	Alpha- and gamma-adaptin-binding protein p34	670	27	C	UR	5527.31	5205.64	7168.91	7348.26	6813.18	5676.94
IPI:IPI00021257.1	ARFIP2	Arfaptin-2	671	35	C	UR	8001.66	8641.43	9105.78	8424.31	7577.63	8865.39
IPI:IPI00218728.4	PAFAH1B1	Isoform 1 of Platelet-activating factor acetylhydrolase IB subunit alpha	671	141	C	UR	34675.3	48470.2	45421.9	36384.7	34818.4	40959.9
IPI:IPI00401264.5	ERP44	Endoplasmic reticulum resident protein ERp44	671	66	C	UR	17482.8	15024.1	18145.8	13441.7	14092.7	16068.7
IPI:IPI00021258.2	ARFIP1	Isoform B of Arfaptin-1	671	68	C	UR	22928.8	18215.5	17788.1	16230.5	21267.8	24660.2
IPI:IPI00646105.3	PYCRL	pyrroline-5-carboxylate reductase-like	672	16	C	UR	3287.16	3982.19	4966.49	4545.36	3406.14	3620.76
IPI:IPI00328987.3	BYSL	Bystin	673	48	C	UR	10882.1	11749.5	13377.8	15806.1	16211.8	12660.4
IPI:IPI00009805.3	PSMC3IP	Isoform 1 of Homologous-pairing protein 2 homolog	674	19	C	UR	4076.23	6150.75	5690.22	6553.7	6755.02	5796.72
IPI:IPI00604763.2	TMEM66	Transmembrane protein 66	675	9	C	UR	1714.68	1490.74	2645.68	2120.86	1877.01	1771.62
IPI:IPI00000171.1	TSC22D4	TSC22 domain family protein 4	676	21	C	UR	5783.55	4823.21	5884.97	6665.87	6096.28	5361.45
IPI:IPI00301610.9	TSC22D1	Isoform 1 of TSC22 domain family protein 1	676	2	C	UR	1341.66	1153.99	1491.66	1079.31	1271.22	1350.86
IPI:IPI00164935.3	TSC22D2	Isoform 2 of TSC22 domain family protein 2	676	10	C	UR	1347.42	1234.91	1422.93	1120.27	1016.02	1116.54
IPI:IPI00016152.7	TSC22D3	Isoform 1 of TSC22 domain family protein 3	676	1	C	UR	140.053	84.2252	75.6674	71.9186	54.8985	75.7121
IPI:IPI00385464.5	FLJ36031	Isoform 1 of Uncharacterized protein FLJ36031	677	4	C	UR	2054.94	1981.7	1535.85	1607.2	1405.88	1719.8
IPI:IPI00291893.4	DCUN1D1	DCN1-like protein 1	678	34	C	UR	9407.63	9083.17	8991.45	8832.26	8864.27	10790.5
IPI:IPI00009904.1	PDIA4	Protein disulfide-isomerase A4	679	405	C	UR	92577.6	90764.6	115885	92112.2	107704	112119
IPI:IPI00015836.1	APPL1	DCC-interacting protein 13-alpha	679	55	C	UR	14615.9	11624.6	10974.9	19669.3	18605.9	20268.5
IPI:IPI00043565.3	ZNF830	Zinc finger protein 830	679	24	C	UR	5475.94	4848.92	4870.67	8034.97	5785.13	5710.77
IPI:IPI00009123.2	NUCB2	Isoform 1 of Nucleobindin-2	680	88	C	UR	21861.8	16971.2	18540.5	31245.2	35790.4	30103.1
IPI:IPI00152007.1	ARHGEF17	Rho guanine nucleotide exchange factor 17	681	10	C	UR	1874.56	1907.1	1942.68	1742.41	1170.03	1401.84
IPI:IPI00418234.4	MECP2	Isoform A of Methyl-CpG-binding protein 2	682	41	C	UR	20244.8	18582.4	11197.3	11572.5	12910.4	14353.2
IPI:IPI00186704.2	GALK2	galactokinase 2 isoform 2	683	23	C	UR	6586.11	6105.73	5844.93	8127.96	8041.2	6835.72
IPI:IPI00555902.1	OCIAD2	Isoform 1 of OCIA domain-containing protein 2	683	34	C	UR	9523.62	8735.92	12473.4	12611.5	12690.6	16092.8
IPI:IPI00410013.3	ZC3H3	Isoform 1 of Zinc finger CCCH domain-containing protein 3	684	11	C	UR	1638.59	1979.25	2171.47	2647.04	2481.4	1925.2
IPI:IPI00166051.5	FAM177A1	Protein FAM177A1	685	10	C	UR	4845.51	3285.44	4109.53	3740.85	3424.33	3132.59
IPI:IPI00019904.2	ADD2	Isoform 1 of Beta-adducin	686	23	C	UR	4876.71	6204.25	5810.07	4425.21	11907.5	12449.3
IPI:IPI00011635.3	BCL2L13	Isoform 2 of Bcl-2-like protein 13	687	39	C	UR	9074.44	10206.5	13231.2	12248.4	9895.73	9758.04
IPI:IPI00149650.3	PPWD1	Peptidylprolyl isomerase domain and WD repeat-containing protein 1	688	52	C	UR	12138.7	15846.5	15962.7	16680.6	16154.2	16685.5
IPI:IPI00293845.5	RIF1	Isoform 1 of Telomere-associated protein RIF1	689	206	C	UR	46078.2	77892.6	72489.5	67421	54622.7	51422.3
IPI:IPI00555734.3	ASRGL1	Isoform 1 of L-asparaginase	690	50	C	UR	10391.7	8117.1	8063.13	12737.3	19648.5	22931.6
IPI:IPI00386045.1	HEATR7A	Isoform 3 of HEAT repeat-containing protein 7A	691	2	C	UR	185.855	140.858	170.658	156.339	237.245	197.658
IPI:IPI00021831.1	PRKAR1A	cAMP-dependent protein kinase type I-alpha regulatory subunit	692	104	C	UR	33799.4	25539	22350.4	23809.3	27520	30352.9
IPI:IPI00554488.3	PRKAR1B	cAMP-dependent protein kinase type I-beta regulatory subunit	692	9	C	UR	3067.62	2410.21	2128.35	2292.18	2565.27	1990.95
IPI:IPI00220871.4	RPL37	60S ribosomal protein L37	693	78	C	UR	6241.7	6553.79	7968.44	8262.54	7208.21	6806.28
IPI:IPI00384180.4	YRDC	YrdC domain-containing protein, mitochondrial	694	27	C	UR	7193.02	5850.77	7621.74	7656.61	5937.26	5645.76
IPI:IPI00386271.4	SLC25A12	Calcium-binding mitochondrial carrier protein Aralar1	695	51	C	UR	14964.3	12342.5	14041.1	18027.1	20384.3	16774
IPI:IPI00007084.3	SLC25A13	Calcium-binding mitochondrial carrier protein Aralar2	695	83	C	UR	29546.9	24467.2	19620.4	18176.9	29469.4	34073.1
IPI:IPI00293817.3	NAPG	Gamma-soluble NSF attachment protein	696	66	C	UR	39228.5	29228.6	22629.9	19420.4	17014.5	16240.3
IPI:IPI00305423.6	CHMP6	Charged multivesicular body protein 6	696	17	C	UR	5294.56	5792.21	5539.8	7157.85	7047.68	5359.43
IPI:IPI00477313.3	HNRNPC	Isoform C2 of Heterogeneous nuclear ribonucleoproteins C1/C2	697	330	C	UR	64886.6	79884.1	96461.7	82289.9	91107.8	93747.1
IPI:IPI00909232.1	HNRNPC	cDNA FLJ53542, highly similar to Heterogeneous nuclear ribonucleoproteins C	697	106	C	UR	18803.1	18110.4	18192.4	16075.6	18446.4	22029.9
IPI:IPI00019993.1	MYBL2	Myb-related protein B	698	27	C	UR	6744.63	7604.69	9163.89	9052.13	9210.35	10928.2
IPI:IPI00219497.1	MYB	Isoform 4 of Myb proto-oncogene protein	698	12	C	UR	2888.69	2899.46	2976.15	9701.1	7891.13	3770.52
IPI:IPI00411886.4	NOC2L	Nucleolar complex protein 2 homolog	699	53	C	UR	16632.7	14768.8	16372.7	18186.5	16537.4	15768.3
IPI:IPI00328306.9	ZC3H11A	Zinc finger CCCH domain-containing protein 11A	700	125	C	UR	36221.7	37303	34591.7	45256.7	45255.2	46761.8
IPI:IPI00171626.3	LPCAT1	Lysophosphatidylcholine acyltransferase 1	700	35	C	UR	5887.84	4975.81	5719.52	4608.31	7798.44	8867.46
IPI:IPI00015924.1	TFIP11	Isoform 1 of Tuftelin-interacting protein 11	700	74	C	UR	23559.9	20663.2	22130.1	25233	26277.9	23094.8
IPI:IPI00018009.2	EDC3	Enhancer of mRNA-decapping protein 3	701	38	C	UR	9236.73	9125.08	10741.4	11730.3	11410.3	11516.5
IPI:IPI00010810.1	ETFA	Electron transfer flavoprotein subunit alpha, mitochondrial	702	103	C	UR	33912.1	30039.6	29994.8	21987.5	30545.1	34263.4
IPI:IPI00010190.3	DECR2	Isoform 1 of Peroxisomal 2,4-dienoyl-CoA reductase	703	13	C	UR	3108.36	4431.4	5337.89	3442.01	3500.42	4278.27
IPI:IPI00011916.1	AIMP2	Multisynthetase complex auxiliary component p38	704	80	C	UR	23268.3	21308.1	18320.3	16294.5	13880.1	15567.5
IPI:IPI00893993.1	AIMP2	28 kDa protein	704	1	C	UR	831.706	738.278	561.461	444.018	563.945	589.201
IPI:IPI00028127.1	ETS1	Isoform c-ETS-1A of Protein C-ets-1	705	14	C	UR	2783.49	2425.8	2618.4	10177.3	8765.23	2769.71
IPI:IPI00010157.1	MAT2A	S-adenosylmethionine synthetase isoform type-2	706	164	C	UR	42173.5	36355.8	43003.2	52806.2	50333.8	41773.7
IPI:IPI00021772.1	MAT1A	S-adenosylmethionine synthetase isoform type-1	706	7	C	UR	2107.7	1624.29	1296.46	1575.58	2954.68	3584.3
IPI:IPI00328884.7	RAB3IL1	Isoform 1 of Guanine nucleotide exchange factor for Rab3A	707	9	C	UR	1925.49	1958.45	2959.64	2486.73	1651.18	2104.85
IPI:IPI00044842.1	RAB3IP	Isoform 2 of RAB3A-interacting protein	707	12	C	UR	5120.35	4130.77	4518.4	4159.96	5074.38	5822.45
IPI:IPI00384122.5	DLST;DLSTP	cDNA FLJ55034, highly similar to Dihydrolipoyllysine-residue succinyltransferase component of 2- oxoglutarate dehydrogenase complex, mitochondrial	708	73	C	UR	13469.5	15974.1	19198.7	14597.9	14718.5	16908.8
IPI:IPI00384016.1	DLST;DLSTP	Full-length cDNA 5-PRIME end of clone CS0DJ009YL13 of T cells (Jurkat cell line) of Homo sapiens (Fragment)	708	73	C	UR	12147.1	14289.6	17024.9	12991.2	13022	14546.2
IPI:IPI00154388.6	OSBPL5	oxysterol-binding protein-like protein 5 isoform b	709	20	C	UR	4480.75	3724.59	4257.73	4607.24	4962.94	4201.4
IPI:IPI00163644.2	OSBPL8	Oxysterol-binding protein	709	69	C	UR	13568.1	17587.9	16594.5	20305.1	19323.5	17632.3
IPI:IPI00784154.1	HSPD1	60 kDa heat shock protein, mitochondrial	710	1443	C	UR	290939	363091	425458	267272	320216	304932
IPI:IPI00853400.1	FKBP15	Isoform 1 of FK506-binding protein 15	711	50	C	UR	14101	15287.1	14125.8	15238.2	12483.6	12518
IPI:IPI00026513.6	RPIA	Ribose-5-phosphate isomerase	712	47	C	UR	10078.3	9718.02	10767.3	19473.7	19637.1	9442.69
IPI:IPI00397474.1	ESPL1	Isoform 1 of Separin	713	38	C	UR	8770.99	9854.12	9694.6	9390.79	9830.09	15418.5
IPI:IPI00009841.5	EWSR1	Ewing sarcoma breakpoint region 1, isoform CRA_h	714	85	C	UR	19271	16809.5	13807	24498.9	19901.1	22247.5
IPI:IPI00878484.1	EWSR1	Protein	714	1	C	UR	871.199	760.188	420.027	871.05	602.598	729.985
IPI:IPI00396185.2	MAK10	Protein MAK10 homolog	715	33	C	UR	14850.2	12136.1	13955.2	12241.7	12368.6	12400.4
IPI:IPI00013076.1	FGFR1OP	Isoform 1 of FGFR1 oncogene partner	716	23	C	UR	9811.05	6937.33	6510.46	9508.75	7348.53	7268.67
IPI:IPI00328840.9	THOC4	THO complex 4	717	148	C	UR	30423.6	32326	29143.6	45651.7	30484.2	31037.1
IPI:IPI00015953.3	DDX21	Isoform 1 of Nucleolar RNA helicase 2	718	313	C	UR	83546	74766.2	97053	97687.7	83805	60647
IPI:IPI00031554.1	DDX50	ATP-dependent RNA helicase DDX50	718	74	C	UR	22777.2	21970.3	22100.7	29825.3	28155.5	22678.1
IPI:IPI00607799.5	BDH2	Isoform 1 of 3-hydroxybutyrate dehydrogenase type 2	719	28	C	UR	5733.87	7001.8	6961.18	16417	19153	12660.5
IPI:IPI00289344.4	NCOR1	Isoform 1 of Nuclear receptor corepressor 1	720	77	C	UR	19643.6	19901.3	20569.9	20837	21352.6	23222.7
IPI:IPI00001735.6	NCOR2	Isoform 1 of Nuclear receptor corepressor 2	720	98	C	UR	26830.2	25971.1	25663.9	30899	26529.7	23745.2
IPI:IPI00304676.5	INTS5	Integrator complex subunit 5	721	11	C	UR	2949.04	3056.95	3357.76	3181.43	3870.9	4958.67
IPI:IPI00442121.4	ALAD	Delta-aminolevulinic acid dehydratase	722	21	C	UR	9133.97	7804.68	7235.85	7423.23	7774.43	8161.65
##IPI:IPI00045464.4	IL4I1	Isoform 1 of L-amino-acid oxidase	723	6	C	UR	2789.22	2842.48	3014.33	2596.04	2882.01	4303.71
IPI:IPI00011268.2	RALY	RNA binding protein, autoantigenic (HnRNP-associated with lethal yellow homolog (Mouse)), isoform CRA_a (Fragment)	724	146	C	UR	29053.9	27940	27421.5	52854.3	61689.6	36679.8
IPI:IPI00216044.1	RALY	Isoform 1 of RNA-binding protein Raly	724	10	C	UR	538.062	436.967	318.922	2030	1303.88	439.224
IPI:IPI00296432.1	IWS1	Isoform 1 of Protein IWS1 homolog	725	62	C	UR	11374.7	12738.1	14671.7	12858.8	15268.9	14880.1
IPI:IPI00168084.2	USP38	Ubiquitin carboxyl-terminal hydrolase 38	726	6	C	UR	1669.6	1179.82	1517.9	2225.01	2002.45	1795.58
IPI:IPI00007928.4	PRPF8	Pre-mRNA-processing-splicing factor 8	727	531	C	UR	119386	129178	135574	130871	137619	143626
IPI:IPI00374054.3	ENAH	Isoform 2 of Protein enabled homolog	728	86	C	UR	20027	29219	23856.1	17468	24760.3	26349.5
IPI:IPI00748827.2	POU2F3	cDNA FLJ61459, highly similar to POU domain, class 2, transcription factor 3	729	19	C	UR	3178.74	3041.07	3047.59	2581.26	8241.8	8255.33
IPI:IPI00027828.4	POU2F1	Isoform 1 of POU domain, class 2, transcription factor 1	729	42	C	UR	6750.39	6086.57	5929.77	7684.88	17175.2	16609.6
IPI:IPI00006482.1	ATP1A1	Isoform Long of Sodium/potassium-transporting ATPase subunit alpha-1	730	387	C	UR	197590	128897	87815.1	80306.7	75154.9	85938.3
IPI:IPI00302840.2	ATP1A3	Sodium/potassium-transporting ATPase subunit alpha-3	730	4	C	UR	981.807	848.943	797.515	2719.21	2084.05	825.064
IPI:IPI00784002.2	SACS	Isoform 2 of Sacsin	730	32	C	UR	6357.59	6553.26	8264.53	8935.66	10433	13171
IPI:IPI00456758.4	RPL27A	60S ribosomal protein L27a	730	73	C	UR	14690	13130.9	14997.4	15021.8	13982.1	13816.5
IPI:IPI00063650.3	ELOF1	Elongation factor 1 homolog	730	10	C	UR	2544.01	2388.62	2328.39	2382	1944.79	2001.6
IPI:IPI00008437.7	RSL24D1	Probable ribosome biogenesis protein RLP24	730	31	C	UR	7381.7	6472.64	7408.29	7181.67	6939.58	5868.59
IPI:IPI00554723.5	RPL10	60S ribosomal protein L10	730	130	C	UR	25860.5	24229	26893.3	26519.2	26686.7	27766.6
IPI:IPI00646899.2	RPL10	19 kDa protein	730	2	C	UR	336.603	288.855	426.464	422.015	283.929	384.848
IPI:IPI00010088.1	HDAC4	Histone deacetylase 4	730	37	C	UR	6170.29	7242.07	7244.83	13183.3	10664.5	7354.94
IPI:IPI00217801.4	HDAC5	Isoform 1 of Histone deacetylase 5	730	8	C	UR	2557.51	2347.22	2233.96	1564.17	2088.91	2467.11
IPI:IPI00003766.4	ETHE1	Protein ETHE1, mitochondrial	730	24	C	UR	14700.2	12737.1	3499.59	4484.39	6579.96	7447.72
IPI:IPI00328183.2	C17orf71	Isoform 1 of Protein SMG8	730	33	C	UR	4437.13	8117.55	8038.35	8687.13	8608.16	7442.61
IPI:IPI00219077.4	LTA4H	Isoform 1 of Leukotriene A-4 hydrolase	730	184	C	UR	42806.8	79423.5	61614.4	47406.9	43442.4	47011.5
IPI:IPI00299571.5	PDIA6	Isoform 2 of Protein disulfide-isomerase A6	730	164	C	UR	58102	48762.6	42992.5	34941.3	33828.5	40185.4
IPI:IPI00173359.2	UACA	Uveal autoantigen with coiled-coil domains and ankyrin repeats	730	40	C	UR	21633	18904.9	17536.6	13968.1	13482.1	15059.6
IPI:IPI00239405.4	SYNE2	Isoform 1 of Nesprin-2	730	541	C	UR	164489	152893	137239	151444	198110	231664
IPI:IPI00430472.2	ASCC3	Activating signal cointegrator 1 complex subunit 3	730	129	C	UR	48293	35522.4	31363	39077.5	44930.3	40516.6
IPI:IPI00029628.1	RCN2	Reticulocalbin-2	730	92	C	UR	16449.7	16591.4	20746	19052.8	23754.9	31733.7
IPI:IPI00299635.7	BIRC6	baculoviral IAP repeat-containing 6	730	131	C	UR	47616	32636.9	36392.7	33085.1	34034.4	34790.3
IPI:IPI00292746.6	DTX2	Isoform 1 of Protein deltex-2	730	4	C	UR	1226.08	1129.55	990.312	945.933	944.091	960.798
IPI:IPI00216171.3	ENO2	Gamma-enolase	730	242	C	UR	30444.2	57935.3	49775.4	38805.5	73298.8	83994.3
IPI:IPI00218474.5	ENO3	Beta-enolase	730	136	C	UR	26789.3	42255.4	38970.4	27191	22473.9	25816.2
IPI:IPI00465248.5	ENO1	Isoform alpha-enolase of Alpha-enolase	730	1215	C	UR	224394	369445	320913	241315	176010	201712
IPI:IPI00008318.1	EPHA4	Ephrin type-A receptor 4	730	14	C	UR	3859.23	4248.52	4684.79	3968.44	4227.93	4817.51
IPI:IPI00328587.4	-	Putative uncharacterized protein ENSP00000352320	730	265	C	UR	74667.1	117483	101828	85921	61854.4	64124.5
IPI:IPI00021267.2	EPHA2	Ephrin type-A receptor 2	730	46	C	UR	6918.94	11872.1	23293.9	25516.7	6542.68	8905.36
IPI:IPI00021275.4	EPHB2	Isoform 1 of Ephrin type-B receptor 2	730	12	C	UR	4690.12	3063.32	1918.06	1664.52	2009	2011.83
IPI:IPI00186826.1	EPHB4	Ephrin receptor	730	10	C	UR	2692.09	2635.67	3536.41	2468.22	3465.53	3754.32
IPI:IPI00479786.5	KHSRP	KH-type splicing regulatory protein	730	362	C	UR	64419.6	77697.1	89816.8	86354.5	82045.9	89812.2
IPI:IPI00759532.1	RAI14	Isoform 1 of Ankycorbin	730	59	C	UR	33479.7	25834.9	16369.7	16074.9	25771.6	29134.3
IPI:IPI00414431.2	NF2	Isoform 1 of Merlin	730	23	C	UR	7455.12	6858.31	5638.74	6663.97	6443.15	7810.48
IPI:IPI00377261.1	FUBP3	Isoform 1 of Far upstream element-binding protein 3	730	122	C	UR	27626.5	32466.3	32658.4	28900.3	30058.5	33286
IPI:IPI00375441.2	FUBP1	Isoform 1 of Far upstream element-binding protein 1	730	348	C	UR	84466.1	77891.5	70212.7	88833.3	73176.7	74660
IPI:IPI00853059.2	FUBP1	Isoform 2 of Far upstream element-binding protein 1	730	27	C	UR	3902.94	3578.95	3889.69	4502.23	4154.6	3815.99
IPI:IPI00247295.3	SYNE1	Isoform 4 of Nesprin-1	730	18	C	UR	4601.51	6244.55	6341.38	6062.18	6306.81	7839.84
IPI:IPI00023073.1	XRCC3	DNA repair protein XRCC3	730	11	C	UR	2613.23	2509.61	2998.62	3718.55	4016.8	3752.56
IPI:IPI00298105.4	EPHA3	Isoform 1 of Ephrin type-A receptor 3	730	11	C	UR	2140.34	3971.11	4300.39	3842.67	3663.66	3440.9
IPI:IPI00215729.1	HDAC9	Isoform 3 of Histone deacetylase 9	730	13	C	UR	2221	2164.65	2557.65	2206.71	7987.92	5922.31
IPI:IPI00289329.2	EPHB3	Ephrin type-B receptor 3	730	17	C	UR	5258.79	3616.99	3438.66	3423.92	3827.29	4190.53
IPI:IPI00552303.3	ANXA11	Annexin A11	730	4	C	UR	620.671	550.213	629.284	536.708	622.412	954.54
IPI:IPI00414320.2	ANXA11	cDNA FLJ55482, highly similar to Annexin A11	730	114	C	UR	33288.7	27968.6	26631.3	31037.4	34588.9	25718.5
IPI:IPI00294380.5	PCK2	Phosphoenolpyruvate carboxykinase [GTP], mitochondrial	730	78	C	UR	26004.3	23996.3	14994.4	15946.8	17598.8	18841.5
IPI:IPI00797038.1	PCK2	mitochondrial phosphoenolpyruvate carboxykinase 2 isoform 1 precursor	730	4	C	UR	1153.09	1022.15	572.669	587.858	634.506	701.457
IPI:IPI00374018.8	FAM102B	Isoform 1 of Protein FAM102B	730	4	C	UR	1490.26	1119.07	1638.68	1075.69	1435.05	1446.39
IPI:IPI00217157.5	DDX59	Isoform 1 of Probable ATP-dependent RNA helicase DDX59	730	19	C	UR	5731.37	5004.13	4759.56	3736.01	7567.07	8592.26
IPI:IPI00414442.3	CDK5RAP3	cDNA FLJ56403, highly similar to CDK5 regulatory subunit-associated protein 3	730	41	C	UR	14122.7	12506.1	13027	10761.5	11262.3	13054.6
IPI:IPI00295252.2	PREX1	Isoform 1 of Phosphatidylinositol 3,4,5-trisphosphate-dependent Rac exchanger 1 protein	730	71	C	UR	12596.8	36855.3	33676	22110.4	12349.1	14307.7
IPI:IPI00030320.4	DDX6	Probable ATP-dependent RNA helicase DDX6	730	173	C	UR	34649.1	40225.5	42756.6	37465.7	40481.5	44746.3
IPI:IPI00374694.2	CDK5RAP3	16 kDa protein	730	3	C	UR	745.891	629.049	679.752	574.507	561.944	720.238
IPI:IPI00411980.3	FAM102A	Isoform 1 of Protein FAM102A	730	1	C	UR	214.989	188.75	172.822	143.92	158.909	184.066
IPI:IPI00296211.6	DYM	Isoform 1 of Dymeclin	730	4	C	UR	2402.26	2055.91	2461.8	1953.73	2485.58	3247.35
IPI:IPI00008290.3	EPHA5	Ephrin receptor	730	4	C	UR	1272.72	2074.11	2160.3	1981.97	2016.82	2112.67
IPI:IPI00004317.1	POLG	DNA polymerase subunit gamma-1	731	28	C	UR	6688.56	6763.92	6809.46	6777.29	6493.15	6650.12
IPI:IPI00413780.3	PKN3	Serine/threonine-protein kinase N3	732	2	C	UR	466.128	618.526	649.537	382.382	846.14	964.052
IPI:IPI00219299.4	TLN2	Talin-2	732	113	C	UR	36047	31726.2	29299.3	27437.8	28521.2	31958.8
IPI:IPI00298994.6	TLN1	Talin-1	732	796	C	UR	235690	196596	171848	172427	165481	179985
IPI:IPI00026942.5	ERLIN2	Isoform 1 of Erlin-2	732	77	C	UR	24631.8	34080.2	39408.3	18198.7	23694	31223.6
IPI:IPI00007940.6	ERLIN1	ER lipid raft associated 1	732	59	C	UR	19997.8	23687.5	27428.2	20538.2	22181.7	26773.3
IPI:IPI00395769.2	ATP5C1	Isoform Heart of ATP synthase subunit gamma, mitochondrial	732	143	C	UR	33102.4	36304.1	42270.7	35275.1	44091.9	43625.5
IPI:IPI00478410.2	ATP5C1	Isoform Liver of ATP synthase subunit gamma, mitochondrial	732	1	C	UR	47.4394	80.6568	68.898	38.7476	99.1202	54.9052
IPI:IPI00412672.1	PKN1	protein kinase N1 isoform 1	732	50	C	UR	12997.7	11407.6	12242.5	15290.6	15636.9	15648.5
IPI:IPI00029822.4	SMARCA4	SWI/SNF-related matrix-associated actin-dependent regulator of chromatin a4 isoform D	732	249	C	UR	60959.8	64227	69427.7	74835.4	74619.3	73827
IPI:IPI00900285.1	SMARCA4	SWI/SNF-related matrix-associated actin-dependent regulator of chromatin a4 isoform C	732	1	C	UR	66.4946	76.0037	82.6328	75.7031	71.5622	103.044
IPI:IPI00514648.1	SMARCA2	Isoform Long of Probable global transcription activator SNF2L2	732	39	C	UR	12077.4	9736.04	11091.8	9622.61	11356.3	12076.5
IPI:IPI00002804.1	PKN2	Serine/threonine-protein kinase N2	732	119	C	UR	35098.1	31285.7	27975.7	21397.6	28553.2	31416.8
IPI:IPI00009319.1	NCKIPSD	Isoform 1 of NCK-interacting protein with SH3 domain	732	11	C	UR	2414.29	2257.2	1595.75	1488.85	2144.87	2161.53
IPI:IPI00783902.1	HEATR5A	Isoform 1 of HEAT repeat-containing protein 5A	732	6	C	UR	2082.25	1418.51	1003.9	910.513	1232.87	1158.3
IPI:IPI00452463.1	DZIP3	Isoform 1 of E3 ubiquitin-protein ligase DZIP3	732	3	C	UR	311.255	351.901	243.355	172.928	382.542	378.535
IPI:IPI00413324.6	RPL17;LOC100133931	60S ribosomal protein L17	732	180	C	UR	43718.1	40399.9	42924.6	42257.1	40652	41734
IPI:IPI00063106.4	SENP5	Sentrin-specific protease 5	732	5	C	UR	1343.06	1237.82	1250.56	1359.78	1279.97	1288.76
IPI:IPI00013075.1	KATNA1	Isoform 1 of Katanin p60 ATPase-containing subunit A1	732	28	C	UR	9845.39	10148.1	11385.9	11475.2	11911.4	10250.2
IPI:IPI00022774.3	VCP	Transitional endoplasmic reticulum ATPase	732	644	C	UR	160244	135223	165008	132064	109737	128514
IPI:IPI00789455.3	KATNAL1	Katanin p60 ATPase-containing subunit A-like 1	732	12	C	UR	1568.28	2293.34	3726.3	3160.36	1789.46	2042.47
IPI:IPI00171135.1	RP1-19N1.1;CSGALNACT2	Isoform 1 of Chondroitin sulfate N-acetylgalactosaminyltransferase 2	732	5	C	UR	1952.21	1848.88	2775.62	2541.05	2534.84	2088.86
IPI:IPI00414973.1	FASTKD5	FAST kinase domain-containing protein 5	733	35	C	UR	11181.9	9124.5	8703.8	8939.75	9596.94	7711.82
IPI:IPI00169383.3	PGK1	Phosphoglycerate kinase 1	734	617	C	UR	165602	158254	130856	208527	179588	130493
IPI:IPI00004988.1	MANBAL	Protein MANBAL	735	2	C	UR	315.746	393.84	585.441	444.67	591.72	553.122
IPI:IPI00305442.3	UBAC1	Ubiquitin-associated domain-containing protein 1	736	14	C	UR	4049.88	3859.86	4406.51	3724.11	3960.65	5006.8
IPI:IPI00024934.4	MUT	Methylmalonyl-CoA mutase, mitochondrial	737	73	C	UR	27900.4	22184.1	17488.3	16003.2	17395.4	20518.6
IPI:IPI00424460.3	ZFYVE16	Isoform 1 of Zinc finger FYVE domain-containing protein 16	738	37	C	UR	16514.1	12617.3	14405.7	11143.1	10814	9777.88
IPI:IPI00015894.1	CDC42EP4	Cdc42 effector protein 4	739	39	C	UR	12797	10452.5	7711.55	7006.88	8492.71	8201.73
IPI:IPI00023605.1	CDC42EP1	Isoform 1 of Cdc42 effector protein 1	739	9	C	UR	3347.3	2494.87	2168.94	1380.22	2521.75	2470.94
IPI:IPI00329115.2	C10orf47	Isoform 1 of Uncharacterized protein C10orf47	740	12	C	UR	3642.33	4540.93	6191.85	4644.54	2593.82	2887.62
IPI:IPI00008963.1	ISG20L2	Interferon-stimulated 20 kDa exonuclease-like 2	741	17	C	UR	4171.89	3612.08	3543.88	3519.82	3728.27	4050.76
IPI:IPI00418468.1	ANKRD16	Ankyrin repeat domain-containing protein 16	742	3	C	UR	821.549	1161.52	1101.04	994.161	784.243	928.172
IPI:IPI00019872.1	HSD17B2	Estradiol 17-beta-dehydrogenase 2	743	24	C	UR	6050.1	9306.39	14321.4	3820.57	3493.07	3986.91
IPI:IPI00019901.1	ADD1	Isoform 1 of Alpha-adducin	744	68	C	UR	15297.8	21562.3	26479.2	19082.2	22666	24192.6
IPI:IPI00004408.1	ADD3	Isoform 2 of Gamma-adducin	744	45	C	UR	9037.33	12745.2	17026.8	11755.5	11180.3	11982.7
IPI:IPI00220754.1	ADD3	Isoform 1 of Gamma-adducin	744	1	C	UR	199.683	532.077	802.568	432.722	143.191	202.419
IPI:IPI00171712.1	LCMT2	Leucine carboxyl methyltransferase 2	745	12	C	UR	1756.04	2243.4	2799.89	2632.24	2686.16	2599.97
IPI:IPI00410069.3	ZC3HAV1	Isoform 3 of Zinc finger CCCH-type antiviral protein 1	746	4	C	UR	355.78	383.528	412.301	385.161	341.561	376.396
IPI:IPI00410067.2	ZC3HAV1	Isoform 1 of Zinc finger CCCH-type antiviral protein 1	746	133	C	UR	37061.1	29087.5	32133.2	36116.1	36927.4	33725.6
IPI:IPI00025323.7	MAP9	Isoform 1 of Microtubule-associated protein 9	747	7	C	UR	2988.33	2048.84	1867.4	2099.62	2683.2	2587.01
IPI:IPI00022418.1	FN1	Isoform 1 of Fibronectin	748	197	C	UR	24197.6	105960	70975.9	66158.8	24043.9	30149.6
IPI:IPI00220109.6	ATRX	transcriptional regulator ATRX isoform 2	749	98	C	UR	28391.4	29426.5	28720.7	26610.6	29280.4	32834
IPI:IPI00413734.7	ATRX	Isoform 6 of Transcriptional regulator ATRX	749	1	C	UR	46.296	87.0002	78.3534	76.4949	56.9347	68.4432
IPI:IPI00219155.5	RPL27	60S ribosomal protein L27	749	73	C	UR	16372.5	16419.7	19353.5	16792.6	17060.5	18681.7
IPI:IPI00003923.1	UMPS	Isoform 1 of Uridine 5'-monophosphate synthase	750	92	C	UR	20146	20877.5	25284.3	23796.9	23296	23270
IPI:IPI00019912.3	HSD17B4	Peroxisomal multifunctional enzyme type 2	751	213	C	UR	56419.3	48831.3	41260.5	34899.2	63620	75454.4
IPI:IPI00005040.1	ACADM	Medium-chain specific acyl-CoA dehydrogenase, mitochondrial	752	94	C	UR	33310.9	28821.4	26723.8	28299.3	30407.4	34089.5
IPI:IPI00013789.5	SMYD5	SET and MYND domain-containing protein 5	752	20	C	UR	3854.05	4028.12	5463.87	4987.06	4430.33	4457.49
IPI:IPI00419815.1	GDF6	Growth/differentiation factor 6	753	7	C	UR	1107.51	2359.39	2557.11	1957.63	1134.81	1334.28
IPI:IPI00016780.3	PRDM2	Predicted retinoblastoma binding protein (RIZ) family protein	754	14	C	UR	4479.77	5921.85	5318.36	4564.33	4859.58	5228.64
IPI:IPI00297139.1	MCF2L	Isoform 4 of Guanine nucleotide exchange factor DBS	755	2	C	UR	1342.21	906.254	392.194	531.869	871.318	893.025
IPI:IPI00217629.3	WDR47	Isoform 1 of WD repeat-containing protein 47	756	28	C	UR	5634.03	6115.29	6495.34	5462.33	5461.28	6291.9
IPI:IPI00027438.2	FLOT1	Flotillin-1	757	93	C	UR	23056.2	19750	24808.3	19227.7	28456.9	32956.7
IPI:IPI00009544.3	RALBP1	RalA-binding protein 1	758	32	C	UR	11112.5	9198.5	8351.21	9319.1	10238.9	12264.6
IPI:IPI00007188.5	SLC25A5	ADP/ATP translocase 2	759	309	C	UR	95661.2	93907.9	61522	66078.5	78841.2	97833.1
IPI:IPI00022891.3	SLC25A4	ADP/ATP translocase 1	759	56	C	UR	14493.2	14852.2	21064.7	16034.7	15544.3	19924.8
IPI:IPI00291467.7	SLC25A6	ADP/ATP translocase 3	759	101	C	UR	12235.6	11661.5	23457.2	20542.1	16288.8	17700.9
IPI:IPI00007343.1	RNF113A	RING finger protein 113A	760	27	C	UR	9592.91	9743.7	7690.59	7643.52	6567.59	6510.39
IPI:IPI00028520.2	NDUFV1	Isoform 1 of NADH dehydrogenase [ubiquinone] flavoprotein 1, mitochondrial	761	111	C	UR	30579.6	26350.4	29612.1	24624.3	21756	21146.3
IPI:IPI00218918.5	ANXA1	Annexin A1	762	745	C	UR	99164.1	127620	140398	106052	415478	431580
IPI:IPI00302742.7	BEND5	Isoform 1 of BEN domain-containing protein 5	762	2	C	UR	294.625	398.628	334.658	547.465	472.757	514.716
IPI:IPI00003801.1	PATZ1	Isoform 1 of POZ-, AT hook-, and zinc finger-containing protein 1	763	13	C	UR	2634.16	2925.48	3472.22	3517.75	3926.4	4117.87
IPI:IPI00033022.2	DNM2	Isoform 1 of Dynamin-2	763	201	C	UR	64109.9	53036.1	44643.9	47681.3	51520	53563.2
IPI:IPI00181352.2	DNM2	dynamin 2 isoform 4	763	6	C	UR	1856.83	1527.77	1760.41	2305.39	2344.09	1653.71
IPI:IPI00028912.2	VEZF1	zinc finger protein 161	763	23	C	UR	4174.62	6109.53	5135.27	7053.65	5922.31	6222.83
IPI:IPI00168859.2	MAZ	MYC-associated zinc finger protein isoform 2	763	12	C	UR	2078.23	2008.88	2553.64	2758.72	2170.3	2725.65
IPI:IPI00413140.4	DNM1	Isoform 1 of Dynamin-1	763	25	C	UR	3941.26	3576.05	3859.24	3006.96	11791.2	13081.3
IPI:IPI00030352.2	C10orf28	Isoform 2 of Growth inhibition and differentiation-related protein 88	763	7	C	UR	1110.82	1073.26	1233.47	1203.1	1256.13	1078.39
IPI:IPI00478376.2	INPP5B	Isoform 1 of Type II inositol-1,4,5-trisphosphate 5-phosphatase	763	33	C	UR	12143.7	10344.1	10309.3	10323.6	11987.2	12776.2
IPI:IPI00017704.3	COTL1	Coactosin-like protein	764	40	C	UR	29539.6	28553.5	10155.8	9581.29	10633.1	12277.2
IPI:IPI00305383.1	UQCRC2	Cytochrome b-c1 complex subunit 2, mitochondrial	765	121	C	UR	23461	32585	36398.4	27925.5	28505.4	27666.6
IPI:IPI00028277.8	FTO	Isoform 1 of Protein fto	766	45	C	UR	15908.6	11981.3	12634.6	12585.5	11653.4	10798.7
IPI:IPI00004860.2	RARS	Isoform Complexed of Arginyl-tRNA synthetase, cytoplasmic	767	225	C	UR	98412.1	73714.1	56815.6	52664.5	54494.9	60437.1
IPI:IPI00220568.1	OSBPL6	Isoform 1 of Oxysterol-binding protein-related protein 6	767	18	C	UR	3510.47	4074.41	6415.79	5463.41	3995.77	4729.55
IPI:IPI00023555.1	OSBPL3	Isoform 1a of Oxysterol-binding protein-related protein 3	767	36	C	UR	11043.1	9520.09	9474.52	8656.8	10020.8	10659.5
IPI:IPI00162669.1	OSBPL3	Isoform 1c of Oxysterol-binding protein-related protein 3	767	1	C	UR	48.4199	48.2958	48.9998	75.9684	61.8678	54.0836
IPI:IPI00020332.1	ARG2	Arginase-2, mitochondrial	767	33	C	UR	6252.65	6360.06	7896.06	6968.3	7336.33	8133.1
IPI:IPI00100668.3	GBA2	cDNA FLJ59308, highly similar to Homo sapiens glucosidase, beta (bile acid) 2 (GBA2), mRNA	767	3	C	UR	1419.7	1274.42	1193.87	984.426	1513.75	1502.49
IPI:IPI00410321.2	JAKMIP1	Isoform 1 of Janus kinase and microtubule-interacting protein 1	768	4	C	UR	858.753	718.854	703.106	1673.72	1648.62	1130.69
IPI:IPI00168262.2	GLT25D1	Glycosyltransferase 25 family member 1	769	76	C	UR	25660.2	22404	18235.3	14306.2	17425.4	19717.4
IPI:IPI00514694.1	GLT25D2	Glycosyltransferase 25 family member 2	769	7	C	UR	964.798	1573.86	2131.32	1746.13	1222.24	1422.46
IPI:IPI00000728.3	USP15	Isoform 1 of Ubiquitin carboxyl-terminal hydrolase 15	770	79	C	UR	20952	30087.9	29047.8	26309.4	26789.1	21455.7
IPI:IPI00011836.2	USP4	Isoform UNPEL of Ubiquitin carboxyl-terminal hydrolase 4	770	32	C	UR	9551.41	7831.66	8451.87	8560.19	8988.43	8579.9
IPI:IPI00184533.1	USP11	ubiquitin specific peptidase 11	770	67	C	UR	11284.4	15994.1	17902	20286.3	16650.2	14727.9
IPI:IPI00014437.4	SSNA1	Sjoegren syndrome nuclear autoantigen 1	770	7	C	UR	1141.61	1757.93	3099.8	4069.99	5733.34	2083.55
IPI:IPI00026969.4	SEC23IP	Isoform 1 of SEC23-interacting protein	771	72	C	UR	21164.7	19268.7	23341.1	22556.6	22047.8	21711.5
IPI:IPI00026530.4	LMAN1	Protein ERGIC-53	771	105	C	UR	17084.2	25446.2	26276.9	19671.5	20241	25103.6
IPI:IPI00008524.1	PABPC1	Isoform 1 of Polyadenylate-binding protein 1	772	411	C	UR	78260	82594.5	91009	89802.1	88082.8	88665
IPI:IPI00012726.4	PABPC4	Isoform 1 of Polyadenylate-binding protein 4	772	81	C	UR	37223.7	29806.9	19092	23014.7	24869.7	15582.2
IPI:IPI00025815.2	TARDBP	TDP43	772	72	C	UR	17818.6	22566	20166.4	20804.3	20352.6	19159.7
IPI:IPI00410192.3	SMYD4	SET and MYND domain-containing protein 4	773	3	C	UR	689.027	800.81	895.238	1009.93	862.597	752.825
##IPI:IPI00044683.1	ALS2CR4	Isoform 1 of Amyotrophic lateral sclerosis 2 chromosomal region candidate gene 4 protein	774	1	C	UR	63.3565	185.952	130.713	63.579	49.1337	69.1331
IPI:IPI00026268.3	GNB1	Guanine nucleotide-binding protein G(I)/G(S)/G(T) subunit beta-1	775	38	C	UR	7575.4	8602.98	6831.44	6507.83	7632.17	8708.71
IPI:IPI00003348.3	GNB2	Guanine nucleotide-binding protein G(I)/G(S)/G(T) subunit beta-2	775	90	C	UR	23129.2	17890.9	13990.7	14999.7	14983	15749.1
IPI:IPI00012451.3	GNB4	Guanine nucleotide-binding protein subunit beta-4	775	39	C	UR	5907.13	5437.56	6174.22	5876.87	5318.45	4907.75
IPI:IPI00439194.1	MBD3	Isoform 1 of Methyl-CpG-binding domain protein 3	776	38	C	UR	6918.6	9333.22	9610.66	12862	12193.7	10302.7
IPI:IPI00434623.1	MBD2	Isoform 1 of Methyl-CpG-binding domain protein 2	776	30	C	UR	10841.4	9836.88	8503.03	9884.21	11404.2	11123.5
IPI:IPI00646605.3	UBR4	Isoform 3 of E3 ubiquitin-protein ligase UBR4	777	331	C	UR	100946	104562	108809	89976.4	85771	98777.4
IPI:IPI00783392.2	RB1CC1	RB1-inducible coiled-coil protein 1	777	34	C	UR	9140.03	11505.5	10161.3	8832.37	10840.4	11636.2
IPI:IPI00012199.1	CCDC86	Coiled-coil domain-containing protein 86	777	71	C	UR	12248.3	11313.3	17464	15873.5	15472.4	10499.3
IPI:IPI00387077.2	SLC12A9	Isoform 1 of Solute carrier family 12 member 9	777	6	C	UR	548.916	403.72	350.269	306.653	311.916	377.093
IPI:IPI00018931.6	VPS35	Vacuolar protein sorting-associated protein 35	778	136	C	UR	49204.3	36730.8	32876.9	33585.8	32438.3	29315.1
IPI:IPI00008247.2	ANAPC5	Isoform 1 of Anaphase-promoting complex subunit 5	778	26	C	UR	8105.26	8729.91	8866.5	10046.7	10323.6	8683.53
IPI:IPI00030782.1	STAT6	Isoform 1 of Signal transducer and activator of transcription 6	778	34	C	UR	8570.69	13508	13745.2	11065.4	7954.05	6705.28
IPI:IPI00030783.1	STAT5A	Signal transducer and activator of transcription 5A	778	59	C	UR	17122.5	14463.9	13931.9	43907.6	46651.6	18456.5
IPI:IPI00103415.1	STAT5B	Signal transducer and activator of transcription 5B	778	12	C	UR	1758.11	1766.5	1794.15	4567.42	4439.39	2654.37
IPI:IPI00783118.2	NT5DC2	5'-nucleotidase domain containing 2 isoform 1	778	38	C	UR	8305.2	6805.85	8018.25	5832.71	14254	16370.9
IPI:IPI00438923.3	CRYZL1	Quinone oxidoreductase-like protein 1	779	41	C	UR	16884.5	18464	15935.6	13848.2	12877.6	14235.9
IPI:IPI00024618.2	C3orf37	UPF0361 protein DC12	780	40	C	UR	17851.1	13735.7	9322.14	12043.5	11472.2	10203.2
IPI:IPI00645805.4	IVD	Isovaleryl-CoA dehydrogenase, mitochondrial	781	51	C	UR	12815.4	12001.2	12576.5	16753.8	17521.1	13771.7
IPI:IPI00337495.3	PLOD2	Isoform 2 of Procollagen-lysine,2-oxoglutarate 5-dioxygenase 2	782	42	C	UR	13888.3	11541.2	11868	9773.76	19395	20346.8
IPI:IPI00007208.4	DDX41	Probable ATP-dependent RNA helicase DDX41	783	69	C	UR	26051.6	21424.4	18316.6	22570.9	21510.5	20869
IPI:IPI00009747.1	LSS	Lanosterol synthase	784	89	C	UR	29272.9	24699	21607.1	24496.1	23332.6	26577.8
IPI:IPI00303753.6	C1orf163	Hcp beta-lactamase-like protein C1orf163	785	23	C	UR	12524.2	9154.08	10289.4	10493.9	8983.72	7113.54
IPI:IPI00893476.1	FAM62B	98 kDa protein	786	80	C	UR	21822.6	17430.5	18549	23211.3	24653.3	18462.3
IPI:IPI00154565.1	SYTL1	Isoform 2 of Synaptotagmin-like protein 1	786	11	C	UR	4957.04	4101.12	2536.79	2676.15	3915.03	4393.78
IPI:IPI00022143.3	FAM62A	Isoform 1 of Extended synaptotagmin-1	786	164	C	UR	38742.7	38316	50709.5	44926.4	39491.6	42231.2
IPI:IPI00746655.1	FAM62A	Isoform 2 of Extended synaptotagmin-1	786	3	C	UR	495.749	422.033	574.012	514.455	473.181	556.321
IPI:IPI00013883.5	TRAF3IP2	Isoform 1 of Adapter protein CIKS	786	5	C	UR	1193.89	953.519	1094.01	1128.11	1296.78	1478.3
IPI:IPI00017297.1	MATR3	Matrin-3	786	316	C	UR	72431.8	76557.9	73368.9	79115.7	78903	78563.3
IPI:IPI00789551.1	MATR3	Putative uncharacterized protein MATR3	786	5	C	UR	815.734	699.781	797.598	704.386	794.022	995.448
IPI:IPI00291570.9	CASP2	Isoform ICH-1L of Caspase-2	787	30	C	UR	4283.31	4318.23	4601.28	9534.49	7807.23	5066.37
IPI:IPI00219006.5	RPS19BP1	Active regulator of SIRT1	788	12	C	UR	3128.39	2867.48	2903.78	3347.81	2975.57	3496.26
IPI:IPI00154451.9	MMS19	cDNA FLJ55586, highly similar to MMS19-like protein	789	32	C	UR	9977.76	8764.93	10025.5	10130.6	9770.06	11279.7
IPI:IPI00396387.3	GNL1	Isoform 1 of Guanine nucleotide-binding protein-like 1	790	79	C	UR	23919.6	21617.2	15663.7	17755.3	20240.7	23078.7
IPI:IPI00289031.5	FAM160B1	Isoform 1 of UPF0518 protein FAM160B1	791	22	C	UR	7604.71	6191.66	7144.26	9484.23	8634.79	8196.53
IPI:IPI00477180.2	FAM160B2	Putative uncharacterized protein FAM160B2	791	6	C	UR	1125.39	1165	1064.55	879.917	938.701	934.22
IPI:IPI00654780.2	FAM160B2	UPF0518 protein FAM160B2	791	2	C	UR	649.365	672.096	547.597	387.617	437.122	420.986
IPI:IPI00305282.2	RAD50	Isoform 1 of DNA repair protein RAD50	792	161	C	UR	50846.8	50682	59073.3	51093.6	50825.4	54504.3
IPI:IPI00783987.2	C3	Complement C3 (Fragment)	793	39	C	UR	9143.39	8577.07	8234.48	9465.98	12019.9	21748.7
IPI:IPI00291802.3	LMO7	Isoform 3 of LIM domain only protein 7	794	91	C	UR	27830.5	28352.8	26707.8	19393.5	35409.3	38266.5
IPI:IPI00152325.2	RG9MTD2	RNA (guanine-9-)-methyltransferase domain-containing protein 2	795	13	C	UR	2573.44	2416.43	2342.47	4425.78	3337.77	3390.93
IPI:IPI00002188.2	ARFGEF1	Brefeldin A-inhibited guanine nucleotide-exchange protein 1	796	55	C	UR	11842.5	11523	11440.8	15395.3	14723.4	13630.5
IPI:IPI00002186.5	ARFGEF2	Brefeldin A-inhibited guanine nucleotide-exchange protein 2	796	59	C	UR	19463.4	16717.6	16370	18686.3	18502.4	16841.1
IPI:IPI00002405.4	OAS3	2'-5'-oligoadenylate synthetase 3	797	101	C	UR	18486.7	23196	41783.2	43495.4	22106.4	28544.9
IPI:IPI00000861.1	LASP1	Isoform 1 of LIM and SH3 domain protein 1	798	92	C	UR	27938.2	21624.7	16980.9	18693.9	21632.7	24250.3
IPI:IPI00418240.1	NEBL	nebulette non-muscle isoform	798	10	C	UR	4298.71	3105.79	2112.13	2061.42	3236.01	4073.13
IPI:IPI00016458.2	L2HGDH	Isoform 1 of L-2-hydroxyglutarate dehydrogenase, mitochondrial	799	29	C	UR	10980	9749.18	10433.6	9935.52	10088.8	11174.8
IPI:IPI00328318.7	AGL	175 kDa protein	800	142	C	UR	47170.8	40956.3	38264.5	33639.1	39398.6	46015
IPI:IPI00000733.4	UTP18	U3 small nucleolar RNA-associated protein 18 homolog	801	52	C	UR	11964.1	12639	13488.7	13944.3	14328.3	12048.7
IPI:IPI00219430.1	MED24	Mediator of RNA polymerase II transcription subunit 24	802	21	C	UR	4975.01	4854.93	4995.12	5457.04	5807.45	5928.36
IPI:IPI00156689.3	VAT1	Synaptic vesicle membrane protein VAT-1 homolog	803	96	C	UR	22274.3	18731.9	17022.3	28721.5	26913.9	31103.7
IPI:IPI00100010.3	RNF34	E3 ubiquitin-protein ligase RNF34	804	7	C	UR	1674.82	1786.45	1895.76	1912.52	1914.08	2391.69
IPI:IPI00031386.2	PIK3CA	Phosphatidylinositol-4,5-bisphosphate 3-kinase catalytic subunit alpha isoform	805	12	C	UR	3043.65	2699.84	3022.62	2796.44	2907.82	2867.85
IPI:IPI00217223.1	PAICS	Multifunctional protein ADE2	806	235	C	UR	55417.1	67914.4	61202.6	98423.2	81187.6	55656.7
IPI:IPI00029056.2	SEPHS1	Selenide, water dikinase 1	807	54	C	UR	9654	8673.83	11307.3	11986.5	10675	12751.6
IPI:IPI00016906.2	SEPHS2	Selenide, water dikinase 2	807	12	C	UR	3700.55	3567.3	4203.59	4095.5	4784.22	6172.83
IPI:IPI00180375.6	ARRB2	Isoform 1 of Beta-arrestin-2	808	22	C	UR	5026.24	4340.25	5957.72	7029.89	7208.26	6415.63
IPI:IPI00336017.5	ARRB1	Isoform 1B of Beta-arrestin-1	808	50	C	UR	12467.3	11497.7	13292.7	10483.4	5667.15	7533.87
IPI:IPI00026167.5	NHP2L1	NHP2-like protein 1	809	40	C	UR	7993.82	8799.58	12213.6	12942.6	14971.2	12290.9
IPI:IPI00296157.6	RETSAT	Isoform 1 of All-trans-retinol 13,14-reductase	810	30	C	UR	14440.7	12267.4	10185.6	9454.76	10320	10049.1
IPI:IPI00011702.4	KIAA0406	Uncharacterized protein KIAA0406	811	23	C	UR	4219.45	3746.48	4462.19	5558.09	5407.47	4962.92
IPI:IPI00106552.4	AMBRA1	Isoform 2 of Activating molecule in BECN1-regulated autophagy protein 1	812	18	C	UR	1557.37	1346.11	1622.71	1710.63	1528.29	1711.47
IPI:IPI00169280.5	AKR7L	Isoform 1 of Aflatoxin B1 aldehyde reductase member 4	813	16	C	UR	3421.68	3799.97	3639.16	2975.58	4089.73	5226
IPI:IPI00305978.4	AKR7A2	Aflatoxin B1 aldehyde reductase member 2	813	40	C	UR	8625.93	9254.6	9254.68	7950.15	10366.4	12920.1
IPI:IPI00329629.6	DNAJC7	DnaJ homolog subfamily C member 7	814	123	C	UR	32572.5	27211.4	28254.4	53922.9	53582.7	39038.7
IPI:IPI00473014.5	DSTN	Destrin	815	97	C	UR	47154.3	36757	23494.4	20714.6	20544.3	23987.1
IPI:IPI00413344.3	CFL2	Cofilin-2	815	28	C	UR	7299.66	14051.6	18415.9	13802.4	7816.67	11097.6
IPI:IPI00012011.6	CFL1	Cofilin-1	815	486	C	UR	142317	121315	117364	114617	117439	110210
IPI:IPI00013338.2	CENPO	Isoform 1 of Centromere protein O	816	4	C	UR	409.455	515.29	541.962	557.878	618.606	523.957
IPI:IPI00020416.8	TPP2	Tripeptidyl-peptidase 2	817	223	C	UR	68170.9	52695.1	52394.4	68829	62552.4	60940
IPI:IPI00023647.4	UBA6	Isoform 1 of Ubiquitin-like modifier-activating enzyme 6	818	156	C	UR	44776.9	48472.1	45313.5	52657.9	52063.6	50974.3
IPI:IPI00305289.2	KIF11	Kinesin-like protein KIF11	818	170	C	UR	35133.4	47847.7	47891.7	46209.4	58144.8	69647.5
IPI:IPI00414384.1	HSDL2	Isoform 1 of Hydroxysteroid dehydrogenase-like protein 2	819	72	C	UR	22729.6	20830.3	22978.9	20123	22485.9	23728.1
IPI:IPI00003814.1	MAP2K6	Isoform 1 of Dual specificity mitogen-activated protein kinase kinase 6	820	30	C	UR	5816.36	10701.5	9042.97	11999.9	12171	12505.1
IPI:IPI00218858.1	MAP2K3	Isoform 2 of Dual specificity mitogen-activated protein kinase kinase 3	820	21	C	UR	6665.29	6017.47	6462.02	5831.46	5786.37	6835.01
IPI:IPI00033217.3	AASS	Alpha-aminoadipic semialdehyde synthase, mitochondrial	821	90	C	UR	18210.6	46738	45996.2	27521	39680.3	44014
IPI:IPI00306057.2	RBM38	Isoform 1 of RNA-binding protein 38	822	4	C	UR	1827.05	1550.94	1478.18	1470.02	2156.71	2440.39
IPI:IPI00658210.1	WDR48	Isoform 1 of WD repeat-containing protein 48	823	45	C	UR	10890.9	12130.4	11000.3	15447.7	15609.7	16196.5
IPI:IPI00217023.2	MMAA	MMAA protein	824	19	C	UR	4013.02	3688.21	3718.64	3930	4476.84	4593.11
IPI:IPI00783625.2	SERPINB5	Isoform 1 of Serpin B5	825	25	C	UR	13099	13674	4544.54	4576.63	12449.7	14240.9
IPI:IPI00004047.1	EXT2	Isoform 1 of Exostosin-2	826	25	C	UR	6436.72	4839.91	9175.85	6478.95	5289.61	6192.99
IPI:IPI00470483.1	WDR62	WD repeat-containing protein 62	827	36	C	UR	13311.1	12873.1	11969.5	13212	13557.5	14349.9
IPI:IPI00024975.2	KIF15	Isoform 1 of Kinesin-like protein KIF15	828	123	C	UR	20942.2	33599.2	28811.5	52081.5	50976.7	30328.1
IPI:IPI00004233.2	MKI67	Isoform Long of Antigen KI-67	828	730	C	UR	174859	189504	186215	255089	266888	241809
IPI:IPI00294618.1	PRCC	Proline-rich protein PRCC	828	43	C	UR	9279.21	8926.49	8829.39	8427.59	9186.49	10374
IPI:IPI00003515.1	TRIP11	Thyroid receptor-interacting protein 11	828	121	C	UR	47049.1	38600.2	42246	35958.5	36721.5	40542.8
IPI:IPI00328350.6	FAM129A	Protein Niban	828	164	C	UR	22629.4	47074.8	49214.9	53903.3	39114.1	51498.5
IPI:IPI00657798.2	CCDC85C	Coiled-coil domain-containing protein 85C	828	7	C	UR	1745.41	1742.1	1949.96	1570.53	1711.95	1990.33
IPI:IPI00242630.3	HEATR2	Isoform 1 of HEAT repeat-containing protein 2	829	66	C	UR	14093	14979.9	14170.8	10701	9033.81	9083.79
IPI:IPI00783017.1	ZEB2	Zinc finger E-box-binding homeobox 2	830	21	C	UR	3269.55	11093	8944.05	6855.2	4461.23	6394.73
[truncated: 7,550 more rows]

## Sheet: analysis_Total
							default~rq_126_sn sum	default~rq_127_sn sum	default~rq_128_sn sum	default~rq_129_sn sum	default~rq_130_sn sum	default~rq_131_sn sum
							RAW							FC					Log2					Log2
							set I			set II				set I		set II			set I		set II			AVE
Protein Id	Gene Symbol	Description	Group ID	Number of peptides	Collapsed	Parsimony	DMSO	Tala 0.1 uM	Tala 1 uM	Tala 1 uM	Tala 0.1 uM	DMSO		Tala 0.1 uM	Tala 1 uM	Tala 0.1 uM	Tala 1 uM		Tala 0.1 uM	Tala 1 uM	Tala 0.1 uM	Tala 1 uM		Tala 0.1 uM	Tala 1 uM
IPI:IPI00015964.4	GAP43	Neuromodulin	1721	13	C	UR	999.696	1232.99	9282.35	7307.44	1027.65	1285.15		1.23336	9.28517	0.799634	5.68606		0.3026	3.21493	-0.322588	2.50743		-0.00999401	2.86118
IPI:IPI00011286.1	ADRB3	Beta-3 adrenergic receptor	6777	2	C	UR	24.3683	52.9737	165.433	160.385	32.4392	22.345		2.17388	6.78886	1.45174	7.17767		1.12027	2.76317	0.537786	2.84352		0.829028	2.80334
IPI:IPI00003351.2	ECM1	Isoform 1 of Extracellular matrix protein 1	5940	1	C	UR	33.0406	82.3343	204.301	250.934	33.3222	37.531		2.49191	6.18333	0.887858	6.68605		1.31725	2.62838	-0.171599	2.74115		0.572827	2.68477
IPI:IPI00847896.1	GRWD1	Similar to Glutamate-rich WD repeat-containing protein 1	836	2	C	UR	219.283	1494.75	1940.18	1024.95	894.892	261.428		6.81653	8.84784	3.42309	3.92058		2.76904	3.14532	1.7753	1.97107		2.27217	2.5582
IPI:IPI00216387.1	IKZF1	Isoform Ik2 of DNA-binding protein Ikaros	610	1	C	UR	32.8745	26.9258	87.2185	786.655	294.654	63.8249		0.819048	2.65307	4.6166	12.3252		-0.28798	1.40767	2.20683	3.62354		0.959425	2.5156
IPI:IPI00009236.5	CAV1	Isoform Alpha of Caveolin-1	2706	49	C	UR	5424.62	22094	30343.8	26756.2	3894.53	4724.77		4.07291	5.59372	0.824279	5.66296		2.02606	2.48381	-0.278795	2.50156		0.873633	2.49268
IPI:IPI00876963.4	HLA-A	HLA class I histocompatibility antigen, A-2 alpha chain	1436	15	C	UR	1942.2	1645.83	10770.1	11968.6	2040.03	2208.45		0.847405	5.54531	0.923738	5.41946		-0.238876	2.47127	-0.114444	2.43815		-0.17666	2.45471
IPI:IPI00008770.1	GSTM4	Isoform 1 of Glutathione S-transferase Mu 4	3786	124	C	UR	12182.4	21717.8	83172	60583	27550	13765.9		1.78272	6.82723	2.00132	4.40095		0.83408	2.7713	1.00095	2.13781		0.917516	2.45456
IPI:IPI00006034.1	CRIP2	Cysteine-rich protein 2	3228	29	C	UR	3779.09	11810	27802.7	22709.4	4305.47	5995.19		3.12509	7.35698	0.718154	3.78794		1.6439	2.87911	-0.477635	1.92141		0.583132	2.40026
IPI:IPI00056334.5	PRKCDBP	Protein kinase C delta-binding protein	6877	1	C	UR	3.33103	5.06193	25.2633	20.7946	3.85901	5.91651		1.51963	7.58423	0.652244	3.51467		0.603719	2.923	-0.616516	1.81339		-0.00639821	2.3682
IPI:IPI00164708.2	TCF7L2	Isoform 1 of Transcription factor 7-like 2	69	2	C	UR	212.367	484.577	1092.82	1816.18	771.49	381.728		2.28179	5.1459	2.02105	4.75779		1.19017	2.36342	1.0151	2.25029		1.10263	2.30686
IPI:IPI00218831.4	GSTM1	Isoform 1 of Glutathione S-transferase Mu 1	3786	26	C	UR	3782.73	4039.99	21850.7	17968.8	11739.3	4294.72		1.06801	5.77644	2.73343	4.18393		0.0949239	2.53018	1.45071	2.06486		0.772817	2.29752
IPI:IPI00005996.1	HMGA2	High mobility group protein HMGI-C	5786	12	C	UR	727.946	2638.54	5492.94	4787.47	1233.25	1642.55		3.62464	7.54581	0.750814	2.91466		1.85784	2.91568	-0.413472	1.54333		0.722182	2.2295
IPI:IPI00217507.5	NEFM	Neurofilament medium polypeptide	6801	34	C	UR	6604.18	6331.99	39690.2	25719.1	5531.59	7144.14		0.958785	6.00986	0.774284	3.60003		-0.0607205	2.58733	-0.369066	1.84801		-0.214893	2.21767
IPI:IPI00015872.3	TSPAN8	Tetraspanin-8	6412	4	C	UR	794.321	1275.32	4640.38	2676.17	711.986	765.673		1.60555	5.84195	0.929883	3.49519		0.683065	2.54645	-0.10488	1.80537		0.289093	2.17591
IPI:IPI00910178.1	POR	cDNA FLJ59702, highly similar to NADPH--cytochrome P450 reductase	2257	2	C	UR	48.557	165.075	467.367	416.529	192.385	196.837		3.39961	9.62512	0.977382	2.11611		1.76537	3.2668	-0.0330051	1.08142		0.866183	2.17411
IPI:IPI00167222.4	FAM123A	Isoform 2 of Protein FAM123A	321	34	C	UR	2831.34	12910.5	15498.2	11059.3	3152.23	3046.17		4.55986	5.4738	1.03482	3.63056		2.18899	2.45254	0.0493763	1.86019		1.11918	2.15637
IPI:IPI00014375.2	ENPEP	Glutamyl aminopeptidase	2834	22	C	UR	3291.05	3568.73	14857.6	12850.1	2306.23	3042.82		1.08437	4.51455	0.757925	4.22309		0.116863	2.17458	-0.399873	2.0783		-0.141505	2.12644
IPI:IPI00798272.2	BCAT1	Branched-chain-amino-acid aminotransferase	3400	10	C	UR	702.828	2707.52	2227.35	3181.4	1682.22	533.429		3.85232	3.16913	3.1536	5.96406		1.94573	1.66408	1.657	2.57629		1.80136	2.12019
IPI:IPI00011655.1	MT1B	Metallothionein-1B	3723	3	C	UR	616.51	593.516	2166.82	2277.41	169.501	431.168		0.962703	3.51466	0.393121	5.28196		-0.0548374	1.81338	-1.34696	2.40107		-0.700897	2.10723
IPI:IPI00026156.2	HCLS1	Hematopoietic lineage cell-specific protein	425	84	C	UR	8892.97	12059.7	33214.4	53036.9	27079.5	11028.2		1.35609	3.73491	2.45548	4.80921		0.439457	1.90107	1.296	2.2658		0.86773	2.08344
IPI:IPI00013986.2	XAF1	Isoform 1 of XIAP-associated factor 1	2795	3	C	UR	555.832	515.968	1928.7	2376.53	1458.34	483.191		0.92828	3.46993	3.01814	4.91841		-0.107367	1.79491	1.59366	2.29819		0.743147	2.04655
IPI:IPI00020943.3	NR0B1	Isoform 1 of Nuclear receptor subfamily 0 group B member 1	524	17	C	UR	3573.63	3292.44	14716.1	13887.6	2919.86	3445.89		0.921315	4.11797	0.847346	4.03019		-0.118233	2.04193	-0.238977	2.01085		-0.178605	2.02639
IPI:IPI00018252.1	NPY1R	Neuropeptide Y receptor type 1	6256	1	C	UR	280.045	2118.02	1598.63	740.944	270.507	268.044		7.56314	5.70848	1.00919	2.76426		2.91899	2.51311	0.0131961	1.46689		1.46609	1.99
IPI:IPI00412988.1	NTNG1	Isoform 1 of Netrin-G1	6155	3	C	UR	256.018	615.314	1626.31	1077.77	296.773	440.613		2.4034	6.35233	0.673546	2.44607		1.26508	2.66729	-0.570152	1.29047		0.347463	1.97888
IPI:IPI00001453.2	INA	Alpha-internexin	6801	121	C	UR	7903.71	23762.4	55779.6	52815.6	22188.9	24301.8		3.00649	7.05739	0.913056	2.17332		1.58808	2.81914	-0.131225	1.1199		0.728427	1.96952
IPI:IPI00218528.1	PKP1	Isoform 1 of Plakophilin-1	3601	71	C	UR	11132	25550.4	59970.5	36774	11918.6	13020.4		2.29522	5.38722	0.915379	2.82434		1.19863	2.42954	-0.127559	1.49791		0.535537	1.96373
IPI:IPI00010807.1	FZD8	Frizzled-8	5822	1	C	UR	2.57007	21.8176	15.4357	13.2852	8.37941	5.34812		8.48911	6.00595	1.5668	2.48409		3.08561	2.58639	0.647817	1.31272		1.86671	1.94955
IPI:IPI00430622.1	SPG20	Spartin	1175	54	C	UR	5523.24	17767.6	37647.1	23289.6	10015.4	11296.1		3.21688	6.81613	0.886625	2.06174		1.68566	2.76895	-0.173605	1.04386		0.756029	1.90641
IPI:IPI00062237.5	KLHDC7B	Kelch domain-containing protein 7B	5921	1	C	UR	31.5718	23.2556	56.7002	329.371	30.4088	42.8248		0.736594	1.79591	0.710075	7.69113		-0.441058	0.844717	-0.493958	2.9432		-0.467508	1.89396
IPI:IPI00216699.1	FERMT3	Isoform 2 of Fermitin family homolog 3	1681	103	C	UR	12646.5	15274.6	45683.6	53717	29556	14264.8		1.20781	3.61235	2.07195	3.7657		0.272396	1.85294	1.05099	1.91292		0.661694	1.88293
IPI:IPI00024754.5	GPR64	Isoform 1 of G-protein coupled receptor 64	2641	7	C	UR	447.221	521.668	2002.95	1468.83	423.986	499.998		1.16647	4.47866	0.847975	2.93767		0.222144	2.16307	-0.237906	1.55467		-0.00788085	1.85887
IPI:IPI00009439.1	SYT1	Synaptotagmin-1	4407	19	C	UR	4376.89	11453.8	16356.3	15093	3999.12	4402.19		2.61688	3.73697	0.908439	3.42852		1.38785	1.90187	-0.138539	1.77759		0.624655	1.83973
IPI:IPI00010180.4	CES1	Isoform 1 of Liver carboxylesterase 1	1894	322	C	UR	39160.3	126844	160266	115148	33000.7	36818.1		3.2391	4.09256	0.896317	3.12748		1.69559	2.033	-0.157919	1.645		0.768837	1.839
IPI:IPI00299024.9	BASP1	Brain acid soluble protein 1	167	127	C	UR	10813.4	54726.6	76054.3	64580.6	34671.1	35601.3		5.061	7.03334	0.973872	1.814		2.33942	2.81421	-0.0381963	0.859171		1.15061	1.83669
IPI:IPI00005846.2	STEAP1	Similar to Six transmembrane epithelial antigen of prostate	4298	8	C	UR	1521.89	3921.33	7485.61	5267.96	1370.38	2041.64		2.57662	4.91863	0.671215	2.58026		1.36548	2.29826	-0.575152	1.36752		0.395163	1.83289
IPI:IPI00180851.7	SYT6	Isoform 1 of Synaptotagmin-6	2719	4	C	UR	389.462	383.239	1851.52	1303.94	440.604	489.327		0.984022	4.75405	0.900429	2.66476		-0.0232382	2.24916	-0.151316	1.41401		-0.0872772	1.83158
IPI:IPI00005809.7	SDPR	Serum deprivation-response protein	6752	5	C	UR	286.012	1384.18	2407.22	443.064	301.273	298.258		4.83959	8.4165	1.01011	1.48551		2.27488	3.07322	0.0145105	0.570954		1.1447	1.82209
IPI:IPI00019850.2	CD1C	T-cell surface glycoprotein CD1c	6559	1	C	UR	54.2365	47.0176	37.9286	1480.82	1171.93	92.8617		0.8669	0.699319	12.6202	15.9465		-0.206063	-0.515978	3.65766	3.99517		1.7258	1.7396
IPI:IPI00014454.2	RIN1	Isoform RIN1 of Ras and Rab interactor 1	6770	1	C	UR	468.84	437.303	341.127	363.975	11.1337	23.9231		0.932734	0.727598	0.465395	15.2144		-0.100462	-0.458787	-1.10347	3.92736		-0.601967	1.73429
IPI:IPI00029343.2	CNTNAP2	Isoform 1 of Contactin-associated protein-like 2	5728	2	C	UR	156.156	203.518	718.66	503.351	181.533	219.524		1.3033	4.60219	0.826939	2.29292		0.382168	2.20232	-0.274147	1.19719		0.0540108	1.69975
IPI:IPI00029149.1	DNAJC12	Isoform a of DnaJ homolog subfamily C member 12	2406	27	C	UR	3209.71	6238.07	11832.7	9817.24	2753.54	3432.71		1.9435	3.68653	0.802148	2.85991		0.958657	1.88226	-0.31806	1.51597		0.320298	1.69912
IPI:IPI00009890.3	SERPINE2	Glia-derived nexin	2269	13	C	UR	2419.32	3713.8	8824.56	9329.21	2713.71	3258.91		1.53506	3.64754	0.832705	2.86268		0.618295	1.86692	-0.264123	1.51737		0.177086	1.69214
IPI:IPI00300562.2	RAB3B	Ras-related protein Rab-3B	4670	27	C	UR	4126.03	4339.19	21379.8	18077.6	7341.62	8972.38		1.05166	5.18169	0.818247	2.01481		0.0726714	2.37342	-0.289392	1.01064		-0.10836	1.69203
IPI:IPI00012162.2	SOX1	Transcription factor SOX-1	2883	5	C	UR	480.517	482.666	2227.13	1005.6	386.446	461.662		1.00447	4.63486	0.837076	2.17822		0.00643773	2.21253	-0.25657	1.12315		-0.125066	1.66784
IPI:IPI00293793.4	SLC30A3	Zinc transporter 3	4552	1	C	UR	16.6135	55.5392	55.967	62.4586	19.8454	20.8593		3.34302	3.36877	0.951393	2.99428		1.74115	1.75222	-0.0718861	1.58221		0.834632	1.66721
IPI:IPI00007117.1	SERPINB2	Plasminogen activator inhibitor 2	5871	17	C	UR	2627.72	2207.25	10131.9	6803.4	1986.19	2621.57		0.839987	3.85578	0.757634	2.59516		-0.251562	1.94702	-0.400427	1.37582		-0.325994	1.66142
IPI:IPI00296379.1	TNFRSF10B	Isoform Long of Tumor necrosis factor receptor superfamily member 10B	4676	6	C	UR	983.643	2170.15	3321.82	4312.59	1132.08	1466.48		2.20624	3.37706	0.771971	2.94078		1.14159	1.75577	-0.373381	1.5562		0.384103	1.65598
IPI:IPI00003096.1	IL1A	Interleukin-1 alpha	5428	6	C	UR	808.659	913.618	2238.99	2769.39	673.597	779.688		1.12979	2.76877	0.863931	3.55192		0.17606	1.46924	-0.211011	1.8286		-0.0174758	1.64892
IPI:IPI00001893.2	PCDH7	Isoform A of Protocadherin-7	3486	30	C	UR	4186.5	4947.14	16208.1	12576.3	3938.72	4984.64		1.18169	3.87152	0.790171	2.52301		0.24085	1.9529	-0.339762	1.33515		-0.0494562	1.64402
IPI:IPI00021975.2	TNFRSF10A	Tumor necrosis factor receptor superfamily member 10A	1925	8	C	UR	710.922	815.823	2301.83	2203.89	640.519	738.024		1.14756	3.23781	0.867884	2.9862		0.198565	1.69502	-0.204426	1.57831		-0.00293073	1.63667
IPI:IPI00021267.2	EPHA2	Ephrin type-A receptor 2	730	46	C	UR	6918.94	11872.1	23293.9	25516.7	6542.68	8905.36		1.71588	3.36669	0.73469	2.86532		0.778952	1.75133	-0.444792	1.5187		0.16708	1.63501
IPI:IPI00217049.4	OAS2	Isoform p71 of 2'-5'-oligoadenylate synthetase 2	3748	9	C	UR	2379.6	2881.94	10146.5	5106.73	4980.93	2258.54		1.2111	4.26395	2.20538	2.26108		0.276321	2.09219	1.14102	1.17701		0.708673	1.6346
IPI:IPI00291483.3	AKR1C3	Aldo-keto reductase family 1 member C3	2090	50	C	UR	5738.88	5338.07	20631.1	15558.2	4745.74	5815.72		0.930159	3.59497	0.816019	2.6752		-0.104451	1.84598	-0.293325	1.41965		-0.198888	1.63281
IPI:IPI00183786.1	FADS2	Isoform 1 of Fatty acid desaturase 2	1518	30	C	UR	3433.74	6676.94	20373	8046.85	4973.92	4974.23		1.94451	5.93318	0.999938	1.61771		0.959406	2.56881	-8.99133e-05	0.693951		0.479658	1.63138
IPI:IPI00217225.7	NOS1	Isoform 1 of Nitric oxide synthase, brain	2028	16	C	UR	3052.83	2691.49	10362.6	9548.7	3109.94	3422.46		0.881638	3.39442	0.908686	2.79001		-0.181742	1.76317	-0.138147	1.48027		-0.159945	1.62172
IPI:IPI00180240.2	TMSL3	Thymosin beta-4-like protein 3	5461	42	C	UR	7615.67	12578.7	9322.71	37170.8	18347.1	4888.56		1.65169	1.22415	3.75307	7.60363		0.72394	0.291778	1.90807	2.92669		1.31601	1.60923
IPI:IPI00009908.3	ARMCX1	Armadillo repeat-containing X-linked protein 1	5192	1	C	UR	49.0838	95.6852	175.207	165.837	50.4693	64.0614		1.94943	3.56955	0.787827	2.58872		0.963049	1.83574	-0.344049	1.37224		0.3095	1.60399
IPI:IPI00304227.4	CDH11	Isoform 1 of Cadherin-11	4485	24	C	UR	3622.47	9536.13	12640.9	11842	3743.77	4504.32		2.63249	3.48958	0.831151	2.62903		1.39643	1.80305	-0.266818	1.39453		0.564806	1.59879
IPI:IPI00451450.3	PRSS35	Inactive serine protease 35	5682	5	C	UR	801.197	2292.24	3344.67	2202.62	908.655	1007.43		2.86102	4.17459	0.901953	2.18638		1.51653	2.06163	-0.148875	1.12854		0.683827	1.59509
IPI:IPI00253036.5	CD99	Isoform I of CD99 antigen	5291	12	C	UR	342.666	435.405	1227.46	873.117	462.972	343.784		1.27064	3.58209	1.34669	2.53973		0.345555	1.8408	0.429423	1.34467		0.387489	1.59274
IPI:IPI00807336.2	TRBV20-1	V_segment translation product	3458	3	C	UR	309.406	277.845	352.116	4016.15	4247.55	511.396		0.897995	1.13804	8.30579	7.85331		-0.155221	0.18655	3.05412	2.9733		1.44945	1.57992
IPI:IPI00020464.4	PAG1	Phosphoprotein associated with glycosphingolipid-enriched microdomains 1	3396	17	C	UR	1729.31	2892.64	2779.41	10593.7	5288.04	1908.18		1.67271	1.60724	2.77125	5.55173		0.74219	0.684582	1.47054	2.47294		1.10636	1.57876
IPI:IPI00306604.5	ITGA5	Integrin alpha-5	3059	23	C	UR	3661.25	9884.83	11711	10490	4804.4	3808.8		2.69985	3.19863	1.26139	2.75415		1.43288	1.67746	0.33502	1.46161		0.88395	1.56953
IPI:IPI00009703.1	SOX2	Transcription factor SOX-2	2883	16	C	UR	2093.17	6320.57	8786.28	6346.13	2293.41	3076.17		3.01962	4.1976	0.745541	2.063		1.59437	2.06956	-0.423641	1.04474		0.585362	1.55715
IPI:IPI00219628.3	PRKCB	Isoform Beta-II of Protein kinase C beta type	195	64	C	UR	8918.78	21674.4	29003.4	25480.8	16712.4	9586.07		2.4302	3.25195	1.7434	2.65811		1.28107	1.7013	0.801908	1.4104		1.04149	1.55585
IPI:IPI00220754.1	ADD3	Isoform 1 of Gamma-adducin	744	1	C	UR	199.683	532.077	802.568	432.722	143.191	202.419		2.66461	4.01921	0.707399	2.13775		1.41392	2.00691	-0.499404	1.0961		0.45726	1.5515
IPI:IPI00444727.3	DLG2	Isoform 1 of Disks large homolog 2	618	17	C	UR	2185.67	5360.4	8808.21	5529.21	2502.17	2621.86		2.45252	4.02998	0.954349	2.10889		1.29427	2.01077	-0.0674108	1.07648		0.613427	1.54363
IPI:IPI00217466.3	HIST1H1D	Histone H1.3	286	29	C	UR	6119.7	12052.8	11669.7	15378.6	16927.1	3461.83		1.96951	1.90691	4.88964	4.44233		0.977836	0.931235	2.28973	2.15132		1.63378	1.54128
IPI:IPI00871495.1	-	Putative uncharacterized protein ENSP00000381900	6629	2	C	UR	170.634	331.695	398.767	903.876	509.382	257.561		1.9439	2.33697	1.97771	3.50937		0.958952	1.22464	0.983834	1.81121		0.971393	1.51793
IPI:IPI00910164.1	SLC16A1	cDNA FLJ53381, highly similar to Monocarboxylate transporter 1	235	3	C	UR	620.481	3252.04	1364.45	2800.8	986.667	770.041		5.24116	2.19902	1.28132	3.63721		2.38989	1.13686	0.357628	1.86283		1.37376	1.49985
IPI:IPI00296461.4	SMPD1	Isoform 1 of Sphingomyelin phosphodiesterase	2671	33	C	UR	5047.19	6579.37	15961.6	14967.2	4917.24	5934.02		1.30357	3.16247	0.828652	2.52227		0.382469	1.66105	-0.271161	1.33472		0.055654	1.49789
IPI:IPI00216332.2	APCDD1	cDNA FLJ56398, highly similar to Protein APCDD1	3694	7	C	UR	1461.57	2974.27	5496.89	3448.49	1348.16	1652.61		2.03498	3.76095	0.815776	2.08669		1.02502	1.9111	-0.293755	1.06122		0.365631	1.48616
IPI:IPI00215611.5	CRIP1	Cysteine-rich protein 1	4742	7	C	UR	714.858	3082.5	2851.64	2316.27	940.193	1182.8		4.31205	3.9891	0.794888	1.95829		2.10837	1.99606	-0.331177	0.969597		0.888597	1.48283
IPI:IPI00027028.1	PNMA2	Paraneoplastic antigen Ma2	2690	34	C	UR	5713.63	10728.1	18740.1	17170.1	7231.02	7224.7		1.87763	3.27989	1.00087	2.37658		0.908915	1.71365	0.00126148	1.24889		0.455088	1.48127
IPI:IPI00183110.7	ZIM2;PEG3AS;PEG3	Isoform 1 of Paternally-expressed gene 3 protein	213	57	C	UR	10030.8	17882	26933.7	30339.5	9997.74	10533.4		1.78271	2.6851	0.949147	2.88031		0.834071	1.42498	-0.0752973	1.52623		0.379387	1.4756
IPI:IPI00418471.6	VIM	Vimentin	6801	762	C	UR	74867.2	147168	296505	281771	128235	145188		1.96572	3.96041	0.883234	1.94073		0.975058	1.98565	-0.179132	0.956601		0.397963	1.47113
IPI:IPI00032139.1	SERPINB9	Serpin B9	1577	17	C	UR	2845.48	4193.05	8241.54	8714.77	2806.52	3314.1		1.47358	2.89636	0.846842	2.6296		0.559328	1.53424	-0.239835	1.39485		0.159747	1.46454
IPI:IPI00031789.1	IL1RAP	Isoform 1 of Interleukin-1 receptor accessory protein	1812	27	C	UR	6026.09	16241	22266.3	15166.3	7239.57	7391.13		2.69511	3.69498	0.979494	2.05196		1.43035	1.88557	-0.0298909	1.037		0.700228	1.46129
IPI:IPI00218820.1	TPM2	Isoform 3 of Tropomyosin beta chain	16	6	C	UR	900.103	3677.69	4222.93	1578.07	929.513	977.5		4.08585	4.69161	0.950908	1.61439		2.03064	2.23008	-0.0726217	0.690993		0.979008	1.46054
IPI:IPI00011722.3	GRP	Isoform 1 of Gastrin-releasing peptide	6284	3	C	UR	73.8304	230.17	368.027	110.1	76.6806	72.9564		3.11755	4.98476	1.05105	1.50912		1.64041	2.31752	0.0718271	0.593708		0.85612	1.45562
IPI:IPI00182560.3	CYP4F22	Cytochrome P450 4F22	5425	27	C	UR	4787.88	19366.3	17621.3	10856.8	4372.14	5339.03		4.04486	3.6804	0.818902	2.03348		2.01609	1.87986	-0.288238	1.02395		0.863926	1.45191
IPI:IPI00004390.3	DUSP6	Isoform 1 of Dual specificity protein phosphatase 6	1632	8	C	UR	899.351	2238.74	3205.7	2380.72	830.361	1142.03		2.48928	3.56446	0.727092	2.08464		1.31573	1.83368	-0.45979	1.0598		0.42797	1.44674
IPI:IPI00025671.1	DSCR6	Isoform 1 of Protein ripply3	5945	1	C	UR	6.52697	17.4678	46.0864	15.3865	9.66551	14.7032		2.67625	7.06092	0.657375	1.04647		1.42021	2.81986	-0.605212	0.0655349		0.4075	1.4427
IPI:IPI00646640.1	RLBP1L2	Isoform 1 of Retinaldehyde-binding protein 1-like protein 2	3138	9	C	UR	1062.19	1752.25	3469.15	3026.39	1275.28	1342.91		1.64966	3.26604	0.949639	2.25361		0.722167	1.70754	-0.0745486	1.17224		0.323809	1.43989
IPI:IPI00171518.4	SLAIN1	cDNA FLJ55194	77	15	C	UR	1760.5	3203.33	7418.49	4761.03	2318.72	2800.82		1.81956	4.21385	0.827872	1.69987		0.863587	2.07514	-0.272521	0.765424		0.295533	1.42028
IPI:IPI00008561.1	MMP1	Interstitial collagenase	1093	8	C	UR	2002.7	1887.1	5946.63	6353.89	2164.76	2640.07		0.942278	2.96931	0.819963	2.40671		-0.0857754	1.57013	-0.286369	1.26706		-0.186072	1.41859
IPI:IPI00375631.6	ISG15	Interferon-induced 17 kDa protein	3728	28	C	UR	4322.68	5169.97	12934.8	9214.67	3196.03	3878.33		1.19601	2.99231	0.824074	2.37594		0.25823	1.58126	-0.279155	1.2485		-0.0104624	1.41488
IPI:IPI00922344.1	-	cDNA FLJ59690, highly similar to Mus musculus SH3 and PX domains 2A (Sh3pxd2a), mRNA	899	1	C	UR	45.8619	85.0833	161.713	152.413	60.5651	75.9496		1.85521	3.52609	0.797438	2.00677		0.89158	1.81807	-0.326556	1.00487		0.282512	1.41147
IPI:IPI00219219.3	LGALS1	Galectin-1	4151	264	C	UR	33353.2	114245	97318.1	76297	25964.5	32224.6		3.42531	2.9178	0.805735	2.36766		1.77623	1.54488	-0.311622	1.24346		0.732306	1.39417
IPI:IPI00220806.1	OAS1	Isoform p48 of 2'-5'-oligoadenylate synthetase 1	5018	12	C	UR	1975.81	2295.87	4381.95	6033.97	1362.1	1953.59		1.16199	2.2178	0.697229	3.08866		0.216597	1.14913	-0.520295	1.62698		-0.151849	1.38805
IPI:IPI00877805.1	ARFGAP3	ADP-ribosylation factor GTPase activating protein 3	577	1	C	UR	144.903	430.224	249.084	461.62	330.391	116.267		2.96905	1.71897	2.84166	3.97034		1.57	0.781545	1.50673	1.98926		1.53837	1.3854
IPI:IPI00333776.6	NRCAM	Isoform 1 of Neuronal cell adhesion molecule	550	26	C	UR	3481.4	3388.34	12416	8826.47	4392.91	4630.92		0.973269	3.56638	0.948604	1.90599		-0.0390889	1.83446	-0.0761219	0.930538		-0.0576054	1.3825
IPI:IPI00073958.1	CNRIP1	Isoform 1 of CB1 cannabinoid receptor-interacting protein 1	6207	7	C	UR	1552.67	6959.38	5957.32	2585.96	1502.6	1466.13		4.4822	3.83682	1.02488	1.7638		2.16421	1.93991	0.035448	0.818687		1.09983	1.3793
IPI:IPI00001872.3	PCDHGC3;PCDHGA12	Isoform 1 of Protocadherin gamma-C3	5550	3	C	UR	933.008	1292.13	3936.68	2012.42	1179.44	1270.19		1.38491	4.21934	0.928554	1.58435		0.46979	2.07702	-0.106942	0.663887		0.181424	1.37045
IPI:IPI00176221.7	NEGR1	Neuronal growth regulator 1	6729	2	C	UR	90.1814	471.41	310.983	213.939	92.2953	111.553		5.22735	3.44842	0.827367	1.91782		2.38608	1.78593	-0.2734	0.93947		1.05634	1.3627
IPI:IPI00302829.5	RB1	Retinoblastoma-associated protein	1244	87	C	UR	13267	18354.3	27832.4	56326.1	51692.4	17986		1.38346	2.09787	2.87404	3.13166		0.468276	1.06892	1.52308	1.64693		0.995677	1.35793
IPI:IPI00018300.2	IFIT1	Interferon-induced protein with tetratricopeptide repeats 1	441	40	C	UR	8489.03	9941.93	20561.2	21097.9	9416.68	7812.79		1.17115	2.42209	1.20529	2.70043		0.227926	1.27625	0.269381	1.43319		0.248653	1.35472
IPI:IPI00299066.5	LPXN	Leupaxin	5843	6	C	UR	770.212	732.35	887.512	4283.54	2696.28	754.833		0.950842	1.1523	3.57202	5.67482		-0.0727223	0.204511	1.83674	2.50457		0.882009	1.35454
IPI:IPI00335259.6	DLC1	deleted in liver cancer 1 isoform 1	4571	3	C	UR	566.852	1158.32	1515.95	1906.2	617.285	780.514		2.04343	2.67433	0.79087	2.44224		1.03099	1.41918	-0.338488	1.2882		0.346251	1.35369
IPI:IPI00032107.1	SLC26A2	Sulfate transporter	4582	13	C	UR	2713.42	4151.81	8510.22	5892.7	2787.34	2836.56		1.5301	3.13634	0.982648	2.07741		0.613628	1.64908	-0.0252534	1.05479		0.294187	1.35194
IPI:IPI00830067.1	ARHGAP30	Isoform 1 of Rho GTPase-activating protein 30	3201	9	C	UR	1203.31	1008.36	1244.55	8828.08	6281.76	1406.05		0.837989	1.03427	4.46766	6.27864		-0.254998	0.0486158	2.15952	2.65045		0.952262	1.34953
IPI:IPI00221226.7	ANXA6	Annexin A6	16	6	C	UR	538.847	1209.04	1253.2	1238.86	1261.49	447.449		2.24375	2.32571	2.81929	2.76872		1.16591	1.21767	1.49533	1.46922		1.33062	1.34344
IPI:IPI00022418.1	FN1	Isoform 1 of Fibronectin	748	197	C	UR	24197.6	105960	70975.9	66158.8	24043.9	30149.6		4.37895	2.93318	0.797487	2.19435		2.13058	1.55247	-0.326468	1.13379		0.902058	1.34313
IPI:IPI00009817.5	CHCHD8	Isoform 2 of Coiled-coil-helix-coiled-coil-helix domain-containing protein 8	4005	3	C	UR	213.599	240.465	436.992	321.178	208.898	102.472		1.12578	2.04585	2.03859	3.1343		0.170922	1.0327	1.02757	1.64814		0.599245	1.34042
IPI:IPI00465105.4	DNAJA4	DnaJ (Hsp40) homolog, subfamily A, member 4 isoform 1	16	3	C	UR	532.629	574.102	1399.49	1268.44	405.461	520.003		1.07786	2.62751	0.779728	2.43929		0.108176	1.3937	-0.358957	1.28646		-0.12539	1.34008
IPI:IPI00292817.6	KIAA1462	Uncharacterized protein KIAA1462	1666	14	C	UR	2346.57	4840.48	7538.81	5380.14	2386.16	2697.44		2.06279	3.21269	0.884602	1.99454		1.0446	1.68378	-0.1769	0.996053		0.433848	1.33992
IPI:IPI00294052.6	SSBP2	Single-stranded DNA-binding protein 2	4661	3	C	UR	43.4797	43.3428	56.0167	300.841	277.446	60.6944		0.996851	1.28834	4.5712	4.95665		-0.00454963	0.365515	2.19257	2.30937		1.09401	1.33744
IPI:IPI00024621.3	OLFML3	Isoform 1 of Olfactomedin-like protein 3	4505	21	C	UR	3090.06	6308.4	10330.7	5499.35	2711.73	2888.04		2.04151	3.3432	0.938952	1.90418		1.02964	1.74123	-0.0908772	0.92917		0.469381	1.3352
IPI:IPI00090807.6	METTL7B	Methyltransferase like 7B	2250	6	C	UR	749.277	828.404	2137.46	2143.65	758.394	964.729		1.1056	2.8527	0.786121	2.22202		0.144835	1.51233	-0.347176	1.15187		-0.10117	1.3321
IPI:IPI00237671.9	NEFL	Neurofilament light polypeptide	6801	11	C	UR	3320.17	3048.05	10662.3	7158.52	3133.87	3631.73		0.91804	3.21137	0.862914	1.9711		-0.123371	1.68319	-0.212712	0.979004		-0.168041	1.3311
IPI:IPI00893383.1	CEBPZ	17 kDa protein	2236	1	C	UR	113.856	520.265	557.041	359.671	370.123	279.222		4.5695	4.8925	1.32555	1.28812		2.19204	2.29057	0.406592	0.365265		1.29931	1.32792
IPI:IPI00334238.1	NPTXR	Neuronal pentraxin receptor	5891	4	C	UR	706.862	854.885	2373.76	1528.62	828.606	823.715		1.20941	3.35817	1.00594	1.85576		0.274302	1.74767	0.00854101	0.892013		0.141421	1.31984
IPI:IPI00219264.1	TOX2	Isoform 2 of TOX high mobility group box family member 2	2313	6	C	UR	392.037	1908.36	1576.31	917.9	554.476	598.758		4.86781	4.02082	0.926044	1.53301		2.28327	2.00749	-0.110848	0.616364		1.08621	1.31193
IPI:IPI00047169.6	SYNPR	cDNA FLJ16439 fis, clone BRAMY2046109, highly similar to Synaptoporin	5506	5	C	UR	999.296	2895.49	2831.84	2456.22	900.131	1129.71		2.89753	2.83384	0.796781	2.1742		1.53482	1.50276	-0.327746	1.12049		0.603539	1.31162
IPI:IPI00043083.1	PARVB	Beta-parvin	3143	7	C	UR	1121.05	1144.15	3470.87	3145.87	1194.6	1583.18		1.02061	3.09609	0.754557	1.98706		0.0294256	1.63045	-0.406298	0.990634		-0.188436	1.31054
IPI:IPI00220213.1	TNC	Isoform 4 of Tenascin	366	38	C	UR	7770.05	7797.1	20661.5	22367.9	8379.84	9680.22		1.00348	2.65912	0.865666	2.31068		0.00501376	1.41095	-0.208117	1.20832		-0.101552	1.30963
IPI:IPI00024254.3	IFIT3	Interferon-induced protein with tetratricopeptide repeats 3	2105	49	C	UR	10707.6	11579.3	23193.7	27356.4	11818.8	9707.53		1.08141	2.1661	1.21749	2.81806		0.112913	1.1151	0.283907	1.4947		0.19841	1.3049
IPI:IPI00060549.1	GPRASP1	G-protein coupled receptor-associated sorting protein 1	4308	3	C	UR	145.281	631.326	542.814	378.415	534.026	232.564		4.34555	3.7363	2.29625	1.62714		2.11954	1.90161	1.19928	0.702341		1.65941	1.30198
IPI:IPI00794900.3	MTHFD1	cDNA FLJ56016, highly similar to C-1-tetrahydrofolate synthase, cytoplasmic	192	3	C	UR	977.631	5647.53	5351.02	912.806	827.933	823.318		5.77675	5.47346	1.00561	1.10869		2.53026	2.45245	0.00806426	0.148859		1.26916	1.30066
IPI:IPI00017972.3	ZNF703	Isoform 1 of Zinc finger protein 703	4517	14	C	UR	1208.44	4971.09	4392.29	3063.91	1393.4	1843.46		4.11364	3.63468	0.755861	1.66204		2.04042	1.86183	-0.403807	0.732958		0.818305	1.29739
IPI:IPI00908469.1	-	cDNA FLJ52712, highly similar to Tubulin beta-6 chain	474	27	C	UR	5540.33	10963.1	11489.5	9283.88	3075.34	3203.77		1.97878	2.07379	0.959913	2.8978		0.984612	1.05227	-0.0590247	1.53496		0.462794	1.29361
IPI:IPI00448630.1	SARM1	Isoform 1 of Sterile alpha and TIR motif-containing protein 1	3801	14	C	UR	2319.73	2293.28	6644.97	6172.86	2328.28	2960.05		0.988598	2.86454	0.786568	2.08539		-0.0165444	1.51831	-0.346357	1.06032		-0.181451	1.28931
IPI:IPI00749429.1	TTYH3	Isoform 1 of Protein tweety homolog 3	510	13	C	UR	3140.69	2803.58	8619.96	6628.56	3339.52	3055.52		0.892664	2.74461	1.09295	2.16937		-0.163811	1.4566	0.128223	1.11728		-0.0177942	1.28694
IPI:IPI00442073.5	CSRP1	Cysteine and glycine-rich protein 1	3762	169	C	UR	28412.7	70868.6	78390.1	54880.1	21113.5	25443.5		2.49426	2.75898	0.829819	2.15694		1.31861	1.46414	-0.269131	1.10899		0.52474	1.28656
IPI:IPI00003443.3	IFI16	Isoform 1 of Gamma-interferon-inducible protein Ifi-16	2515	184	C	UR	24577	55108.3	66165.9	79261	82439.5	36159.2		2.24227	2.69219	2.2799	2.192		1.16496	1.42878	1.18897	1.13225		1.17697	1.28051
IPI:IPI00432008.2	ATXN1	Ataxin-1	3324	6	C	UR	1337.86	1555.85	2800.74	4177.6	1801.53	1482.46		1.16294	2.09345	1.21523	2.81802		0.217776	1.06588	0.281229	1.49468		0.249503	1.28028
IPI:IPI00382412.5	BCAT1	Branched-chain-amino-acid aminotransferase	3400	44	C	UR	5397.24	12544.7	11455.2	14445.8	10415.2	5199.75		2.32428	2.12242	2.00302	2.77817		1.21678	1.08571	1.00218	1.47414		1.10948	1.27992
IPI:IPI00008868.3	MAP1B	Microtubule-associated protein 1B	175	374	C	UR	49648.4	149531	191348	161589	91440.4	105965		3.0118	3.85406	0.86293	1.52493		1.59063	1.94638	-0.212684	0.608741		0.688971	1.27756
IPI:IPI00783123.5	CC2D2A	Isoform 3 of Coiled-coil and C2 domain-containing protein 2A	6041	1	C	UR	103.634	130.647	325.514	211.631	104.813	113.168		1.26066	3.141	0.926172	1.87006		0.334177	1.65122	-0.110648	0.903085		0.111764	1.27715
IPI:IPI00012966.1	TCF12	Transcription factor 12	145	26	C	UR	2961.02	5649.5	9445.24	10440.9	8392.09	5673.38		1.90796	3.18986	1.4792	1.84033		0.932029	1.67349	0.564822	0.879966		0.748425	1.27673
IPI:IPI00853564.1	ZNF816A	Isoform 2 of Zinc finger protein 816A	6734	1	C	UR	14.9725	20.6172	31.2383	38.5724	31.9081	13.8152		1.377	2.08638	2.30964	2.79203		0.461533	1.061	1.20767	1.48131		0.8346	1.27116
IPI:IPI00220216.1	TNC	Isoform 6 of Tenascin	366	1	C	UR	144.973	222.023	408.92	462.059	169.486	224.369		1.53148	2.82066	0.75539	2.05937		0.614925	1.49603	-0.404707	1.0422		0.105109	1.26912
IPI:IPI00216637.1	SH2D1A	Isoform D of SH2 domain-containing protein 1A	6780	1	C	UR	193.729	147.027	200.383	1555.34	952	277.179		0.758931	1.03435	3.4346	5.61132		-0.397959	0.0487202	1.78014	2.48834		0.691092	1.26853
IPI:IPI00334769.3	ALX4	Homeobox protein aristaless-like 4	5062	15	C	UR	2018.07	3122.04	5946.09	4212.51	1874.52	2143.67		1.54704	2.94642	0.874444	1.96509		0.629513	1.55897	-0.193562	0.974597		0.217976	1.26678
IPI:IPI00006142.3	ARMCX2	Armadillo repeat-containing X-linked protein 2	2334	4	C	UR	423.541	634.21	1125.52	1109.13	433.056	509.758		1.4974	2.65741	0.849533	2.1758		0.582459	1.41002	-0.235259	1.12154		0.1736	1.26578
IPI:IPI00003817.3	ARHGDIB	Rho GDP-dissociation inhibitor 2	2896	150	C	UR	25539	20660.3	20056.6	125029	99202.7	16983		0.808971	0.785332	5.84129	7.36201		-0.305841	-0.348625	2.54629	2.8801		1.12022	1.26574
IPI:IPI00032401.1	SH2D1A	Isoform A of SH2 domain-containing protein 1A	6780	8	C	UR	1447.01	1272.14	1278.67	11463.3	6592.36	1754.91		0.879151	0.883664	3.75652	6.53213		-0.185817	-0.178431	1.9094	2.70755		0.86179	1.26456
IPI:IPI00011421.1	MLLT11	Protein AF1q	6523	13	C	UR	1999.21	4920.88	6778.72	4931.27	3355.14	2903.44		2.46141	3.3907	1.15557	1.69842		1.29949	1.76158	0.20861	0.764196		0.754048	1.26289
IPI:IPI00916188.1	NCL	32 kDa protein	6	3	C	UR	199.423	417.397	498.357	527.813	539.883	229.116		2.09302	2.49899	2.35637	2.30369		1.06559	1.32135	1.23657	1.20395		1.15108	1.26265
IPI:IPI00216057.5	SORD	Sorbitol dehydrogenase	2402	120	C	UR	15658.1	30064	48590.8	43633.8	20729.2	23587.2		1.92003	3.10324	0.878833	1.84989		0.941128	1.63377	-0.18634	0.887442		0.377394	1.26061
IPI:IPI00032140.4	SERPINH1	Serpin H1	666	236	C	UR	27595.4	90655.7	105887	50708.6	26655.8	34116		3.28517	3.83713	0.781328	1.48636		1.71597	1.94003	-0.355999	0.571782		0.679985	1.2559
IPI:IPI00178767.1	SMPDL3A	Acid sphingomyelinase-like phosphodiesterase 3a	6925	1	C	UR	77.9729	150.639	269.137	326.527	155.264	198.435		1.93194	3.45167	0.782443	1.64551		0.950051	1.7873	-0.353943	0.718536		0.298054	1.25292
IPI:IPI00877934.1	RBBP4	retinoblastoma binding protein 4 isoform b	567	1	C	UR	234.654	330.427	583.938	582.326	263.781	256.237		1.40815	2.48851	1.02944	2.27261		0.493797	1.31528	0.0418618	1.18435		0.267829	1.24981
IPI:IPI00472057.1	HLA-B	HLA class I histocompatibility antigen, B-48 alpha chain	1436	2	C	UR	292.511	784.194	1349.4	316.601	330.992	258.262		2.6809	4.61316	1.28161	1.22589		1.42272	2.20576	0.357961	0.29383		0.89034	1.24979
IPI:IPI00008461.2	POLR3K	DNA-directed RNA polymerase III subunit RPC10	6700	1	C	UR	309.164	492.894	617.737	638.323	468.82	226.533		1.59428	1.99809	2.06954	2.81779		0.672905	0.99862	1.04931	1.49457		0.861109	1.24659
IPI:IPI00021941.1	DLGAP1	Isoform 1 of Disks large-associated protein 1	2842	5	C	UR	601.329	1268.8	1903.19	1660.02	956.261	935.1		2.10999	3.16497	1.02263	1.77523		1.07724	1.66219	0.0322838	0.828008		0.554761	1.2451
IPI:IPI00102670.5	FNBP1	Isoform 2 of Formin-binding protein 1	232	122	C	UR	18320.6	29469.8	41948.7	53691.9	61188.3	21976		1.60856	2.2897	2.78432	2.44321		0.685771	1.19516	1.47733	1.28878		1.08155	1.24197
IPI:IPI00014147.3	KIAA0101	PCNA-associated factor	843	25	C	UR	4724.55	5928.08	8943.4	12263.6	12859.9	4150		1.25474	1.89296	3.09877	2.95508		0.327388	0.920646	1.6317	1.5632		0.979542	1.24192
IPI:IPI00000684.4	UAP1	Isoform AGX2 of UDP-N-acetylhexosamine pyrophosphorylase	172	86	C	UR	12536.5	32024.1	32892.4	30248.8	13192.9	14228.7		2.55447	2.62373	0.927203	2.1259		1.35302	1.39162	-0.109042	1.08807		0.621991	1.23985
IPI:IPI00027430.1	SPN	Leukosialin	5964	13	C	UR	2302.25	2252.82	2886	12507.5	6365.34	2811.9		0.97853	1.25356	2.26371	4.44806		-0.0313125	0.326027	1.17869	2.15318		0.57369	1.2396
IPI:IPI00219676.4	DNTT	DNA nucleotidylexotransferase	1113	36	C	UR	5187.88	4989.11	6071.33	30360.5	24355.4	6377.29		0.961686	1.17029	3.81908	4.76072		-0.0563626	0.226867	1.93323	2.25118		0.938432	1.23902
IPI:IPI00332887.5	SIRPA	signal-regulatory protein alpha precursor	2287	20	C	UR	4598.5	8013.76	12456	10265.7	4406.21	5032.57		1.74269	2.70871	0.875539	2.03985		0.801316	1.43761	-0.191757	1.02846		0.304779	1.23304
IPI:IPI00657938.1	SNX18	Isoform 2 of Sorting nexin-18	2895	53	C	UR	10033.7	13675.5	22424.5	20932.9	7316.38	8473.85		1.36296	2.23492	0.863407	2.47029		0.44674	1.16022	-0.211888	1.30468		0.117426	1.23245
IPI:IPI00007156.1	LEF1	Isoform 1 of Lymphoid enhancer-binding factor 1	69	42	C	UR	5228.32	5270.21	6231.17	30397.1	24387.2	6652.69		1.00801	1.19181	3.66577	4.56914		0.011513	0.253156	1.87411	2.19192		0.942814	1.22254
IPI:IPI00020356.4	MAP1A	331 kDa protein	175	196	C	UR	32173.3	71292	92964.4	72834.4	49648.6	38672.2		2.21587	2.88949	1.28383	1.88338		1.14788	1.53081	0.360456	0.913323		0.754166	1.22207
IPI:IPI00009775.3	NINJ2	Ninjurin-2	5300	9	C	UR	920.007	778.245	1145.21	4733.57	3495.96	1086		0.845912	1.24478	3.21912	4.35872		-0.24142	0.315895	1.68666	2.1239		0.722622	1.2199
IPI:IPI00026646.1	FCGRT	IgG receptor FcRn large subunit p51 (Fragment)	5478	13	C	UR	1614.52	4354.67	5154.83	4231.09	1975.77	2492.39		2.69719	3.19279	0.792721	1.6976		1.43146	1.67482	-0.335115	0.7635		0.548172	1.21916
IPI:IPI00908588.1	-	cDNA FLJ59206, highly similar to Eukaryotic translation initiation factor 4B	595	1	C	UR	109.643	887.257	658.818	90.1102	101.378	100.257		8.09224	6.00876	1.01118	0.898792		3.01654	2.58707	0.0160416	-0.153941		1.51629	1.21656
IPI:IPI00029131.1	PCSK2	Neuroendocrine convertase 2	1036	6	C	UR	1259.83	1329.42	3644.8	2709.26	1059.56	1458.15		1.05524	2.89309	0.726647	1.85801		0.0775679	1.53261	-0.460674	0.89376		-0.191553	1.21319
IPI:IPI00021250.3	DAPK1	Death-associated protein kinase 1	16	40	C	UR	8227.24	14723.2	24689.3	17826.3	8714.13	9965.45		1.78957	3.00092	0.874434	1.78881		0.839611	1.58541	-0.193578	0.839		0.323016	1.2122
IPI:IPI00008986.1	SLC7A5	Large neutral amino acids transporter small subunit 1	2309	19	C	UR	5766.56	4640.53	10795.7	10480.9	3517.46	3676.89		0.804731	1.87212	0.95664	2.85048		-0.313421	0.904674	-0.063952	1.5112		-0.188687	1.20794
IPI:IPI00549972.3	LIMD2	LIM domain-containing protein 2	198	4	C	UR	535.03	1705.29	1993.17	1701.02	1385.31	1192.38		3.18728	3.72534	1.1618	1.42658		1.67233	1.89737	0.216365	0.512556		0.944345	1.20496
IPI:IPI00014437.4	SSNA1	Sjoegren syndrome nuclear autoantigen 1	770	7	C	UR	1141.61	1757.93	3099.8	4069.99	5733.34	2083.55		1.53987	2.71529	2.75172	1.95339		0.622808	1.44111	1.46033	0.965982		1.04157	1.20354
IPI:IPI00026928.3	GRAP2	GRB2-related adapter protein 2	1297	38	C	UR	4888.23	4614.6	4978.97	31219.9	25831	6007.45		0.944023	1.01856	4.29983	5.19686		-0.0831066	0.0265352	2.10428	2.37764		1.01059	1.20209
IPI:IPI00796375.1	C12orf45	7 kDa protein	3282	2	C	UR	45.5633	34.3154	34.5136	86.1629	40.7192	12.359		0.753137	0.757487	3.2947	6.97167		-0.409016	-0.400707	1.72015	2.8015		0.655566	1.2004
IPI:IPI00383046.3	CMBL	Carboxymethylenebutenolidase homolog	1958	10	C	UR	1863.97	9009.41	7649.27	2776.2	2022.5	2159.15		4.83345	4.10375	0.936711	1.28578		2.27305	2.03694	-0.0943238	0.362648		1.08937	1.1998
IPI:IPI00073110.4	FYB	cDNA FLJ56106, highly similar to Homo sapiens FYN binding protein (FYB-120/130) (FYB), transcript variant 1, mRNA	4211	36	C	UR	8313.05	7044.29	8622.87	47820.5	38665.9	9407.65		0.847377	1.03727	4.11005	5.08315		-0.238924	0.0527902	2.03916	2.34572		0.900116	1.19926
IPI:IPI00300407.4	SDC2	Syndecan-2	6271	3	C	UR	304.555	1101.53	1559.66	917.59	1252.9	892.854		3.61685	5.12111	1.40325	1.0277		1.85473	2.35646	0.488775	0.0394254		1.17175	1.19794
IPI:IPI00414661.7	LARP6	La-related protein 6	6543	6	C	UR	1027.39	1589.8	2500.18	3078.42	1062.26	1424.82		1.54742	2.43353	0.74554	2.16057		0.629861	1.28305	-0.423643	1.11141		0.103109	1.19723
IPI:IPI00013888.1	ITM2A	Integral membrane protein 2A	4384	20	C	UR	4201.51	8171.92	10259.5	8714.35	7690.54	4052.14		1.945	2.44186	1.8979	2.15056		0.959767	1.28798	0.924401	1.10471		0.942084	1.19634
IPI:IPI00024929.2	ASAM	Adipocyte adhesion molecule	5016	5	C	UR	853.952	1711.32	2658.21	2244.26	1747.34	1331.8		2.004	3.11283	1.31201	1.68513		1.00288	1.63823	0.391783	0.752862		0.697333	1.19555
IPI:IPI00247439.3	SLK	Isoform 2 of STE20-like serine/threonine-protein kinase	1057	2	C	UR	588.544	897.087	1548.04	1309.71	904.022	659.929		1.52425	2.63029	1.36988	1.98462		0.608098	1.39522	0.454047	0.988865		0.531072	1.19204
IPI:IPI00001545.3	WAS	Wiskott-Aldrich syndrome protein	979	15	C	UR	2424.2	2748.87	2651.62	10420.2	6567.57	2193.12		1.13393	1.09381	2.99462	4.75131		0.18133	0.129365	1.58237	2.24833		0.881852	1.18885
IPI:IPI00022139.4	GIMAP2	GTPase IMAP family member 2	1253	9	C	UR	982.05	1019.73	1449.9	4349.25	5810.42	1243.03		1.03837	1.4764	4.6744	3.49891		0.0543188	0.562085	2.22478	1.80691		1.13955	1.1845
IPI:IPI00297251.3	MGRN1	Isoform 2 of Probable E3 ubiquitin-protein ligase MGRN1	6910	2	C	UR	317.748	962.634	1348.64	1074.29	904.962	883.212		3.02955	4.24437	1.02463	1.21634		1.5991	2.08555	0.0350974	0.282552		0.817101	1.18405
IPI:IPI00299150.4	CTSS	Cathepsin S	5855	5	C	UR	1829.64	1457.38	2728.4	3856.93	899.479	1115.44		0.796539	1.49122	0.806389	3.45777		-0.328183	0.576495	-0.310451	1.78984		-0.319317	1.18317
IPI:IPI00915437.1	RNASEH2B	ribonuclease H2, subunit B isoform 2	5247	5	C	UR	655.48	717.84	1100.7	2846.16	2659.49	930.315		1.09514	1.67923	2.8587	3.05935		0.131111	0.747798	1.51536	1.61323		0.823234	1.18051
IPI:IPI00018889.4	GLI3	Zinc finger protein GLI3	3596	3	C	UR	103.262	436.412	510.96	276.859	210.66	267.743		4.22626	4.94819	0.786799	1.03405		2.07938	2.3069	-0.345932	0.0483026		0.866724	1.1776
IPI:IPI00019038.1	LYZ	Lysozyme C	3415	1	C	UR	59.4942	103.736	317.003	37.6219	36.6297	39.1816		1.74363	5.3283	0.93487	0.960193		0.802096	2.41368	-0.0971624	-0.0586036		0.352467	1.17754
IPI:IPI00433150.3	DAB1	Isoform DAB553 of Disabled homolog 1	1512	7	C	UR	2340.46	5169.99	6290.73	5168.67	2023.87	2737.34		2.20896	2.68782	0.739356	1.88821		1.14337	1.42644	-0.435658	0.917018		0.353856	1.17173
IPI:IPI00418382.1	OPLAH	5-oxoprolinase	2471	33	C	UR	5204.26	7113.86	12696.3	11685.6	5000.29	5666.91		1.36693	2.4396	0.882366	2.06208		0.45094	1.28664	-0.180551	1.0441		0.135195	1.16537
IPI:IPI00432363.1	MACF1	Microtubule-actin cross-linking factor 1, isoform 4	899	19	C	UR	3573.07	4807.74	10197.4	7616.76	4502.96	4349.12		1.34555	2.85396	1.03537	1.75133		0.428195	1.51297	0.0501501	0.808454		0.239172	1.16071
IPI:IPI00017659.3	RCSD1	Isoform 1 of Capz-interacting protein	2780	24	C	UR	2831.3	2674.91	2578.96	17192.1	11699.5	3133.52		0.944764	0.910875	3.73366	5.48651		-0.0819743	-0.134675	1.90059	2.45589		0.909308	1.16061
IPI:IPI00107039.3	ABHD6	Monoacylglycerol lipase ABHD6	4462	37	C	UR	7232.02	15084.3	16596.3	16596.3	6643.84	7640.9		2.08577	2.29484	0.86951	2.17203		1.06058	1.19839	-0.201725	1.11905		0.429426	1.15872
IPI:IPI00646241.1	CIRBP	18 kDa protein	2794	1	C	UR	173.795	267.874	306.347	568.605	170.332	201.857		1.54132	1.76269	0.843825	2.81687		0.624168	0.81778	-0.244984	1.49409		0.189592	1.15594
IPI:IPI00514983.4	HSPH1	Heat shock 105kDa/110kDa protein 1, isoform CRA_b	16	83	C	UR	8367.75	7690.77	14767.4	11714.8	6348.47	4167.74		0.919097	1.7648	1.52324	2.81083		-0.121712	0.819504	0.607144	1.491		0.242716	1.15525
IPI:IPI00152434.1	PHOSPHO1	Phosphoethanolamine/phosphocholine phosphatase	594	24	C	UR	4034.99	13992.1	12991.8	8981.14	4943.04	5842.45		3.46769	3.21978	0.846056	1.53722		1.79398	1.68696	-0.241175	0.620325		0.7764	1.15364
IPI:IPI00022039.2	CD84	Isoform 3 of SLAM family member 5	6239	5	C	UR	732.274	601.581	703.062	3802.51	2161.77	738.12		0.821524	0.960108	2.92875	5.15161		-0.283625	-0.0587317	1.55029	2.36502		0.633331	1.15315
IPI:IPI00160418.4	TMEM22	Transmembrane protein 22	6147	2	C	UR	424.019	728.264	1164.92	943.109	451.45	524.175		1.71753	2.74733	0.861258	1.79923		0.780333	1.45803	-0.215482	0.847376		0.282425	1.1527
IPI:IPI00397645.7	MXRA7	Isoform 2 of Matrix-remodeling-associated protein 7	1650	19	C	UR	2655.4	13512	10699	7640.39	6813.93	6258.64		5.0885	4.02915	1.08872	1.22077		2.34724	2.01047	0.122638	0.287797		1.23494	1.14914
IPI:IPI00306543.4	GDF15	Growth/differentiation factor 15	506	5	C	UR	691.309	579.781	745.614	3692.29	1091.31	814.731		0.838671	1.07855	1.33947	4.53191		-0.253823	0.109098	0.421665	2.18012		0.0839213	1.14461
IPI:IPI00002459.4	ANXA6	annexin VI isoform 2	16	305	C	UR	49885.9	113247	119550	100374	110261	49328.9		2.27012	2.39647	2.23522	2.03479		1.18277	1.26091	1.16042	1.02488		1.17159	1.1429
IPI:IPI00845508.3	BAHCC1	BAH and coiled-coil domain-containing protein 1	5395	2	C	UR	188.12	416.233	320.504	735.085	430.397	256.925		2.21259	1.70372	1.67519	2.86109		1.14574	0.768689	0.744321	1.51656		0.945029	1.14263
IPI:IPI00903145.1	RDX	Radixin	16	183	C	UR	36034.7	76242.1	90925	66693	27475.9	34719.2		2.1158	2.52326	0.791375	1.92093		1.0812	1.33529	-0.337567	0.941802		0.371817	1.13855
IPI:IPI00294754.7	TRIM44	Tripartite motif-containing protein 44	487	7	C	UR	3052.52	2419.01	6282.9	5098.51	2512.32	2172.17		0.792463	2.05827	1.15659	2.3472		-0.335584	1.04143	0.209883	1.23094		-0.0628504	1.13618
IPI:IPI00925077.1	RNF168	13 kDa protein	3231	1	C	UR	5.98738	8.96389	5.89362	50.943	58.6658	10.4302		1.49713	0.98434	5.62461	4.88418		0.5822	-0.0227708	2.49175	2.28812		1.53698	1.13267
IPI:IPI00008557.5	IGF2BP1	Insulin-like growth factor 2 mRNA-binding protein 1	16	149	C	UR	20215	74116.6	67895.1	52172.9	31213.3	36494.5		3.66642	3.35865	0.855288	1.42961		1.87437	1.74788	-0.225518	0.515622		0.824426	1.13175
IPI:IPI00000390.2	OLFM3	Isoform 1 of Noelin-3	5602	3	C	UR	635.524	649.777	2127.83	1146.89	679.083	806.313		1.02243	3.34815	0.842208	1.42239		0.0319981	1.74336	-0.247752	0.508315		-0.107877	1.12584
IPI:IPI00021421.4	PPT2	Isoform 1 of Lysosomal thioesterase PPT2	4873	2	C	UR	367.495	460.752	984.721	921.537	557.069	518.971		1.25376	2.67955	1.07341	1.7757		0.326266	1.42199	0.102202	0.828388		0.214234	1.12519
IPI:IPI00016020.1	CD3G	T-cell surface glycoprotein CD3 gamma chain	4546	22	C	UR	3087.92	3006.64	3796.53	17441.1	25019.1	4507.69		0.973678	1.22948	5.55032	3.86919		-0.0384832	0.298046	2.47257	1.95203		1.21704	1.12504
IPI:IPI00168291.4	UGT3A2	UDP-glucuronosyltransferase 3A2	1402	35	C	UR	4927.58	14482.9	16002.9	9623.54	5280.9	6578.07		2.93915	3.24762	0.802804	1.46297		1.5554	1.69938	-0.316881	0.548903		0.619259	1.12414
IPI:IPI00015802.2	ZFPM2	Isoform 1 of Zinc finger protein ZFPM2	6846	1	C	UR	61.8997	252.397	191.07	106.378	67.0349	69.205		4.07752	3.08677	0.968642	1.53714		2.02769	1.6261	-0.0459639	0.620252		0.990863	1.12317
IPI:IPI00103387.5	GIMAP1	GTPase IMAP family member 1	3769	10	C	UR	1810.34	1982.94	2363.02	7455.76	8104.97	2058.19		1.09534	1.30529	3.93791	3.62248		0.13138	0.384371	1.97743	1.85698		1.05441	1.12068
IPI:IPI00027493.1	LOC442497;SLC3A2	4F2 cell-surface antigen heavy chain	3389	191	C	UR	39355.6	32905.2	74202.2	77231.9	27565.2	30813.4		0.8361	1.88543	0.894585	2.50644		-0.258253	0.914893	-0.16071	1.32564		-0.209482	1.12027
IPI:IPI00170979.1	EVL	Isoform 2 of Ena/VASP-like protein	632	58	C	UR	7054.57	6923.85	8066.57	37786	34564.6	9188.8		0.98147	1.14345	3.7616	4.11218		-0.0269837	0.193397	1.91135	2.0399		0.942182	1.11665
IPI:IPI00375676.3	FTL	Ferritin	2454	3	C	UR	696.529	1590.96	1907.88	2026.57	1097.79	1184.41		2.28413	2.73913	0.926867	1.71104		1.19164	1.45372	-0.109566	0.774871		0.541038	1.11429
IPI:IPI00883655.1	-	Dihydropyrimidinase-like 2 long form (Fragment)	181	34	C	UR	3982.42	9504.88	13314.4	11679.5	8356.49	8337.63		2.38671	3.34329	1.00226	1.40082		1.25502	1.74127	0.00325974	0.486269		0.629141	1.11377
IPI:IPI00012923.1	CD3E	T-cell surface glycoprotein CD3 epsilon chain	4431	22	C	UR	3113.91	3185.44	3609.67	18025	23423.8	4464.32		1.02297	1.15921	5.24689	4.03757		0.0327654	0.21314	2.39146	2.01349		1.21211	1.11331
IPI:IPI00059055.5	BARHL2	BarH-like 2 homeobox protein	1149	5	C	UR	858.451	1452.82	2410.25	1989.55	1055.85	1198.32		1.69237	2.80767	0.881109	1.66028		0.759048	1.48938	-0.182608	0.731429		0.28822	1.1104
IPI:IPI00099650.2	JAG1	Protein jagged-1	6586	2	C	UR	558.24	530.048	1439.13	848.673	407.38	471.16		0.949498	2.57798	0.864632	1.80124		-0.0747625	1.36624	-0.209842	0.848992		-0.142302	1.10762
IPI:IPI00180404.7	NEXN	Isoform 1 of Nexilin	5105	6	C	UR	801.613	868.361	1012.8	2611.82	2052.16	710.819		1.08327	1.26345	2.88704	3.67438		0.115389	0.337371	1.52959	1.8775		0.822489	1.10744
IPI:IPI00295400.1	WARS	Tryptophanyl-tRNA synthetase, cytoplasmic	36	164	C	UR	35341.5	31251.1	54989.9	88065.5	28383.5	29576.5		0.884261	1.55596	0.959664	2.97755		-0.177456	0.637803	-0.0593988	1.57413		-0.118428	1.10596
IPI:IPI00009646.1	BCL11B	Isoform 2 of B-cell lymphoma/leukemia 11B	899	78	C	UR	8122.62	17029.9	15719.2	23209.4	19908.6	9733.6		2.0966	1.93524	2.04535	2.38446		1.06805	0.952511	1.03235	1.25366		1.0502	1.10309
IPI:IPI00015475.3	SLC1A1	Excitatory amino acid transporter 3	3718	1	C	UR	61.5662	101.504	194.55	131.42	84.248	90.1366		1.6487	3.16001	0.93467	1.45801		0.721326	1.65993	-0.0974706	0.544		0.311928	1.10197
IPI:IPI00007264.1	HSPB8	Heat shock protein beta-8	4209	17	C	UR	3193.69	16018.3	18362.4	3140.46	3490.03	3922.2		5.01561	5.74959	0.889814	0.800688		2.32642	2.52346	-0.168424	-0.320687		1.079	1.10139
IPI:IPI00032134.2	SERPINB8	Serpin B8	940	15	C	UR	4180.13	4560.01	9252.94	10047.3	4179.89	4875.95		1.09088	2.21355	0.857246	2.06058		0.125489	1.14636	-0.222218	1.04305		-0.0483646	1.09471
IPI:IPI00296441.5	ADA	Adenosine deaminase	3671	182	C	UR	28945.9	26921.3	28835	149607	122503	32709.6		0.930056	0.996169	3.74517	4.57379		-0.104611	-0.00553799	1.90503	2.19339		0.90021	1.09393
IPI:IPI00016600.9	TSPAN7	cDNA FLJ58051, highly similar to Tetraspanin-7	3487	10	C	UR	553.129	422.44	591.152	4688.42	4436.37	1100.36		0.763728	1.06874	4.03174	4.26081		-0.38887	0.0959131	2.0114	2.09113		0.811267	1.09352
IPI:IPI00216138.6	TAGLN	Transgelin	186	9	C	UR	1912.02	3355.1	5496.77	3781.59	1841.23	2393.29		1.75474	2.87485	0.76933	1.58008		0.811258	1.52349	-0.378325	0.659998		0.216466	1.09174
IPI:IPI00022892.2	THY1	Thy-1 membrane glycoprotein	6092	7	C	UR	608.585	1136.35	1733.27	1429.18	752.956	896.292		1.8672	2.84803	0.840079	1.59455		0.900877	1.50997	-0.251403	0.673147		0.324737	1.09156
IPI:IPI00783565.1	SLC6A6	Sodium- and chloride-dependent taurine transporter	5008	1	C	UR	143.657	85.5305	285.172	207.783	176.616	90.9287		0.59538	1.98509	1.94236	2.28512		-0.748117	0.989204	0.957808	1.19227		0.104845	1.09074
IPI:IPI00101037.3	RCN3	Reticulocalbin-3	1272	23	C	UR	2844.29	2532.58	8541.49	7086.24	3615.07	4694.34		0.890409	3.00303	0.770091	1.50953		-0.167461	1.58642	-0.376899	0.594098		-0.27218	1.09026
IPI:IPI00329789.8	ZAP70	Isoform 1 of Tyrosine-protein kinase ZAP-70	876	102	C	UR	12720.5	11322.9	12968.8	64435.8	53691.7	14587.7		0.89013	1.01952	3.68061	4.41713		-0.167912	0.0278896	1.87995	2.14311		0.856017	1.0855
IPI:IPI00005578.1	EHD4	EH domain-containing protein 4	1810	93	C	UR	21724.6	17744.5	47015.3	48118.2	19284.4	23236.8		0.816793	2.16415	0.829908	2.07078		-0.291958	1.1138	-0.268977	1.05017		-0.280467	1.08199
IPI:IPI00023407.4	NCKAP1L	Nck-associated protein 1-like	182	42	C	UR	7316.21	8142.87	10503.7	24555.5	21479.6	7867.67		1.11299	1.43568	2.73011	3.12106		0.154441	0.521729	1.44896	1.64204		0.8017	1.08188
IPI:IPI00004504.1	SASH3	SAM and SH3 domain-containing protein 3	2626	32	C	UR	2536.68	2259.42	2510.21	13427.8	7196.99	2980.44		0.8907	0.989565	2.41474	4.50531		-0.166989	-0.0151335	1.27187	2.17163		0.55244	1.07825
IPI:IPI00023529.1	CDK6	Cell division protein kinase 6	16	76	C	UR	10049.8	8953.23	10236.7	50713.3	51796.1	11637.4		0.890886	1.0186	4.45083	4.35779		-0.166687	0.0265839	2.15407	2.1236		0.993694	1.07509
IPI:IPI00026108.1	PLA2G4A	Cytosolic phospholipase A2	2777	45	C	UR	6967.49	8167.66	31267.7	21642.9	16349.5	21893.8		1.17225	4.48766	0.746764	0.98854		0.229284	2.16596	-0.421276	-0.0166286		-0.095996	1.07467
IPI:IPI00151710.8	ANO6	Anoctamin-6	267	13	C	UR	3562.65	4647.66	5747.29	5613.77	3928.6	2055.15		1.30455	1.61321	1.91159	2.73156		0.383554	0.689931	0.934772	1.44973		0.659163	1.06983
IPI:IPI00018307.1	CD53	Leukocyte surface antigen CD53	5897	2	C	UR	606.916	697.1	702.693	2337.71	1339.86	615.218		1.14859	1.15781	2.17786	3.79981		0.199869	0.211398	1.12291	1.92593		0.661391	1.06866
IPI:IPI00029015.1	KDSR	3-ketodihydrosphingosine reductase	3550	27	C	UR	6227.2	12999.4	15167.5	13616.3	5567.07	7543.37		2.08752	2.43569	0.738008	1.80507		1.06179	1.28433	-0.438291	0.852054		0.311749	1.06819
IPI:IPI00018882.1	RHOH	Rho-related GTP-binding protein RhoH	3188	4	C	UR	1363.64	2113.49	2112.04	3843.53	2689.44	1354.44		1.54989	1.54883	1.98565	2.83773		0.632164	0.631174	0.989609	1.50474		0.810887	1.06795
IPI:IPI00060423.4	CTHRC1	Isoform 1 of Collagen triple helix repeat-containing protein 1	5765	4	C	UR	555.133	750.406	781.835	2033.77	2439.33	652.85		1.35176	1.40837	3.73643	3.11522		0.434838	0.494031	1.90166	1.63933		1.16825	1.06668
IPI:IPI00302740.8	RPS4Y1;LOC100133662	40S ribosomal protein S4, Y isoform 1	3954	24	C	UR	3328.85	3074.58	3300.97	17986	16913.7	4078.48		0.923616	0.991625	4.14706	4.40998		-0.114635	-0.0121338	2.05209	2.14077		0.968727	1.06432
IPI:IPI00303341.6	TNFAIP6	Tumor necrosis factor-inducible gene 6 protein	3482	2	C	UR	657.094	1749.7	1770.3	1152	583.934	710.745		2.66278	2.69414	0.82158	1.62083		1.41294	1.42982	-0.283527	0.696737		0.564705	1.06328
IPI:IPI00010471.5	LCP1	Plastin-2	116	290	C	UR	46117.9	38474.8	42385.1	217919	146370	45908.3		0.83427	0.91906	3.18831	4.74683		-0.261413	-0.12177	1.67279	2.24697		0.70569	1.0626
IPI:IPI00013260.3	LSP1;LOC390387	Lymphocyte-specific protein 1	16	12	C	UR	1949.54	1671.59	1967.44	9797.04	9362.24	2272.44		0.857428	1.00918	4.11991	4.31124		-0.221913	0.0131859	2.04261	2.1081		0.910349	1.06064
IPI:IPI00000794.1	POU1F1	Isoform B of Pituitary-specific positive transcription factor 1	6499	2	C	UR	427.547	580.12	1721.21	737.548	513.734	683.229		1.35686	4.02578	0.751921	1.0795		0.440268	2.00927	-0.411348	0.110368		0.0144603	1.05982
IPI:IPI00021199.2	STMN3	Stathmin-3	2415	14	C	UR	2059.14	2708.07	5350.51	6185.33	6413.3	3714.28		1.31515	2.59842	1.72666	1.66528		0.395223	1.37763	0.787984	0.735768		0.591604	1.0567
IPI:IPI00027436.1	NGFR	Tumor necrosis factor receptor superfamily member 16	1018	10	C	UR	1313.55	4119.22	3427.49	2621.21	1559	1588		3.13594	2.60933	0.981738	1.65064		1.6489	1.38368	-0.02659	0.723022		0.811155	1.05335
IPI:IPI00000075.3	TGFB1	Transforming growth factor beta-1	4575	13	C	UR	3480.28	5937.16	7683.2	7058.79	3808.57	3619.11		1.70594	2.20764	1.05235	1.95042		0.77057	1.1425	0.0736145	0.963786		0.422092	1.05314
IPI:IPI00155168.2	PTPRC	Protein tyrosine phosphatase, receptor type, C	1501	67	C	UR	8496.07	7790.99	8799.16	43899.9	37982.5	10566.2		0.917011	1.03567	3.59472	4.15475		-0.124989	0.0505702	1.84588	2.05476		0.860445	1.05267
IPI:IPI00470535.1	CACNA2D1	Dihydropyridine receptor alpha 2 subunit	3017	17	C	UR	2909.58	5430.89	8404.68	6909.05	3617.55	4653.11		1.86655	2.88862	0.777448	1.48482		0.900378	1.53038	-0.363182	0.570292		0.268598	1.05034
IPI:IPI00515097.3	LCK	Isoform 3 of Proto-oncogene tyrosine-protein kinase LCK	16	74	C	UR	7282.21	7182.83	8467.14	36464.3	39845.6	9903.52		0.986353	1.16272	4.02338	3.68195		-0.019824	0.217498	2.00841	1.88047		0.994292	1.04898
IPI:IPI00054521.2	FZD1	Frizzled-1	3991	3	C	UR	793.673	1700.16	2457.15	1878.89	1079.54	1359.57		2.14214	3.09592	0.79403	1.38197		1.09905	1.63037	-0.332734	0.46673		0.38316	1.04855
IPI:IPI00237884.3	AKAP12	Isoform 1 of A-kinase anchor protein 12	663	166	C	UR	19228.1	66814	61991.6	48400.1	33992.6	36488		3.47481	3.22401	0.93161	1.32647		1.79693	1.68886	-0.102201	0.407588		0.847366	1.04822
IPI:IPI00009803.1	ITGA4	Integrin alpha-4 precursor	954	29	C	UR	4990.51	7334.37	6905.67	19641.4	22376.1	6385.2		1.46966	1.38376	3.50437	3.07608		0.555486	0.468594	1.80915	1.62109		1.18232	1.04484
IPI:IPI00807508.2	TRBV10-3	V_segment translation product	4663	5	C	UR	989.072	851.944	946.056	4108.77	4286.72	925.416		0.861357	0.956509	4.63221	4.43992		-0.215317	-0.06415	2.2117	2.15053		0.998192	1.04319
IPI:IPI00013232.1	IKZF1	Isoform Ik1 of DNA-binding protein Ikaros	610	20	C	UR	2610.67	2781.61	2992.75	20338.8	16978.8	5512.52		1.06548	1.14635	3.08004	3.68956		0.0915001	0.197052	1.62295	1.88345		0.857225	1.04025
IPI:IPI00026824.2	HMOX2	Heme oxygenase 2	1348	49	C	UR	6214.93	13878.8	17113.4	15331	10618.1	10001.1		2.23314	2.75359	1.06169	1.53293		1.15907	1.46132	0.0863669	0.616293		0.62272	1.0388
IPI:IPI00008917.4	DCDC2	Isoform 1 of Doublecortin domain-containing protein 2	5522	12	C	UR	1962.33	2763.19	6586.14	3710.45	2789.95	2955.74		1.40812	3.35629	0.943909	1.25534		0.493767	1.74687	-0.0832801	0.328075		0.205243	1.03747
IPI:IPI00043546.5	SPATA13	Spermatogenesis-associated protein 13	1697	6	C	UR	1211.19	969.118	2919.76	2286.7	1485.83	1308.96		0.800137	2.41065	1.13512	1.74696		-0.321681	1.26942	0.182848	0.804846		-0.0694165	1.03714
IPI:IPI00376219.1	APBB1IP	Amyloid beta A4 precursor protein-binding family B member 1-interacting protein	16	29	C	UR	5695.63	4995.93	5322.37	26413.6	19873.4	5874.66		0.877151	0.934466	3.3829	4.49619		-0.189102	-0.0977866	1.75826	2.1687		0.78458	1.03546
IPI:IPI00177968.2	SCARB1	Isoform 1 of Scavenger receptor class B member 1	4829	9	C	UR	1304.53	2267.37	3643.05	2987.94	1449.58	1998.82		1.73807	2.79261	0.725218	1.49485		0.79749	1.48162	-0.463514	0.580003		0.166988	1.03081
IPI:IPI00879999.1	DDX54	ATP-dependent RNA helicase DDX54	16	1	C	UR	11.2277	11.6957	13.2936	16.2829	12.4141	4.62683		1.04168	1.184	2.68307	3.51923		0.0589158	0.243669	1.42388	1.81526		0.7414	1.02947
IPI:IPI00008965.1	JUN	Transcription factor AP-1	3073	3	C	UR	677.123	691.084	1547.77	1244.61	503.115	683.878		1.02062	2.2858	0.735679	1.81993		0.0294432	1.1927	-0.442851	0.863883		-0.206704	1.02829
IPI:IPI00182116.4	ARHGAP15	Rho GTPase-activating protein 15	4524	31	C	UR	4628.81	3737.93	4048.79	22156.8	19676.4	4663.24		0.807536	0.874693	4.21947	4.75137		-0.308402	-0.193151	2.07706	2.24834		0.88433	1.0276
IPI:IPI00015782.1	C16orf35	UPF0171 protein C16orf35	6764	2	C	UR	22.266	37.9293	59.802	55.0428	36.7303	35.7489		1.70346	2.6858	1.02745	1.53971		0.76847	1.42535	0.0390718	0.622655		0.403771	1.024
IPI:IPI00011696.1	VAV1	Proto-oncogene vav	16	88	C	UR	14544.5	20808.3	27126.9	50911.7	50276.9	22971.9		1.43066	1.8651	2.18863	2.21626		0.516685	0.89925	1.13003	1.14813		0.823355	1.02369
IPI:IPI00295252.2	PREX1	Isoform 1 of Phosphatidylinositol 3,4,5-trisphosphate-dependent Rac exchanger 1 protein	730	71	C	UR	12596.8	36855.3	33676	22110.4	12349.1	14307.7		2.92577	2.67338	0.863109	1.54535		1.54881	1.41866	-0.212386	0.627933		0.668214	1.0233
IPI:IPI00006065.4	TOX	Thymocyte selection-associated high mobility group box protein TOX	2313	17	C	UR	2791.67	2680.27	3038.08	12375.5	8983.06	3263.96		0.960096	1.08827	2.7522	3.79156		-0.0587501	0.122031	1.46058	1.92279		0.700917	1.02241
IPI:IPI00339277.1	SAMSN1	Isoform 1 of SAM domain-containing protein SAMSN-1	2625	3	C	UR	310.731	344.368	363.166	1018.63	673.264	288.736		1.10825	1.16875	2.33176	3.52789		0.148285	0.224963	1.22142	1.81881		0.684853	1.02189
IPI:IPI00010274.6	TPSAB1	Isoform 1 of Tryptase alpha-1	6869	2	C	UR	598.038	575.703	1614.27	1392.84	756.509	912.508		0.962653	2.69928	0.829044	1.52639		-0.0549124	1.43257	-0.27048	0.61012		-0.162696	1.02135
IPI:IPI00019870.1	CAV2	Isoform Alpha of Caveolin-2	1101	4	C	UR	544.948	645.761	989.934	903.877	476.557	401.011		1.185	1.81657	1.18839	2.254		0.244882	0.861214	0.249007	1.17248		0.246944	1.01685
IPI:IPI00028279.5	TSPYL5	Testis-specific Y-encoded-like protein 5	291	23	C	UR	5065.93	10348.2	9611.96	6483.54	2728.13	3029.49		2.0427	1.89737	0.900525	2.14014		1.03048	0.924004	-0.151163	1.09771		0.439659	1.01086
IPI:IPI00022449.6	DOCK2	Isoform 1 of Dedicator of cytokinesis protein 2	16	109	C	UR	19294	17358.5	19182.6	91689.7	75514.3	22533.6		0.899684	0.994226	3.35119	4.06902		-0.15251	-0.008354	1.74467	2.02468		0.796081	1.00816
IPI:IPI00022640.1	NRGN	Neurogranin	1721	3	C	UR	216.956	738.778	988.954	576.843	658.878	651.382		3.4052	4.55832	1.01151	0.885568		1.76774	2.1885	0.0165075	-0.175325		0.892123	1.00659
IPI:IPI00257508.4	DPYSL2	Dihydropyrimidinase-related protein 2	181	112	C	UR	13244.1	29914.9	37363.6	31766.5	18080.5	22290.5		2.25873	2.82115	0.81113	1.42511		1.17551	1.49628	-0.301994	0.511077		0.43676	1.00368
IPI:IPI00024320.1	RBM3	Putative RNA-binding protein 3	2754	35	C	UR	4189.85	5656.62	7819.59	8338.19	5224.67	3886.83		1.35008	1.86632	1.3442	2.14524		0.433042	0.900194	0.426746	1.10114		0.429894	1.00067
IPI:IPI00333338.4	LBH	Protein LBH	4169	11	C	UR	1343.16	2167.34	3122.13	2627.87	1397.33	1528.7		1.61361	2.32447	0.914064	1.71902		0.690294	1.2169	-0.129633	0.781589		0.280331	0.999244
IPI:IPI00418592.2	CD1E	CD1E antigen isoform a precursor	5780	5	C	UR	925.03	857.352	1020.37	3731.49	3240.59	1030.18		0.926837	1.10307	3.14565	3.62217		-0.109613	0.14152	1.65336	1.85686		0.771874	0.999188
IPI:IPI00004409.2	DDR2	Discoidin domain-containing receptor 2	3560	27	C	UR	3582.34	7412.18	8122.98	7589.7	3419.45	4315.16		2.06909	2.26751	0.792427	1.75885		1.049	1.18111	-0.33565	0.814629		0.356673	0.997868
IPI:IPI00025478.1	IRF9	Interferon regulatory factor 9	5013	11	C	UR	3209.94	3169.55	6116.63	6572.2	2484.13	3143.01		0.987417	1.90553	0.790367	2.09105		-0.0182683	0.930191	-0.339406	1.06423		-0.178837	0.99721
IPI:IPI00008215.1	ME1	NADP-dependent malic enzyme	2667	99	C	UR	22370.4	28638.8	37918	32889.9	10579.5	14032.6		1.28021	1.69501	0.753923	2.34382		0.35638	0.761292	-0.407511	1.22886		-0.0255655	0.995077
IPI:IPI00292168.3	ASF1A	Histone chaperone ASF1A	5311	36	C	UR	6197.9	8904.41	7872.32	15842.3	11231.5	5071.13		1.43668	1.27016	2.21479	3.12402		0.522741	0.345009	1.14717	1.6434		0.834956	0.994206
IPI:IPI00784651.7	FADS1	fatty acid desaturase 1	1518	26	C	UR	5182.12	6585.22	13003.9	9272.34	5301.3	5875.63		1.27076	2.50938	0.902252	1.5781		0.345689	1.32733	-0.148397	0.65819		0.0986459	0.99276
IPI:IPI00411706.1	ESD	S-formylglutathione hydrolase	1591	80	C	UR	10867.6	15381.1	24804.7	29998.9	29890	17335.4		1.41532	2.28245	1.72422	1.7305		0.501125	1.19058	0.785942	0.791188		0.643534	0.990884
IPI:IPI00103013.2	SNX33	Sorting nexin-33	2895	6	C	UR	2555.2	2848.95	4796.5	4706.07	1940.25	2253.56		1.11496	1.87715	0.860971	2.08828		0.156994	0.908546	-0.215963	1.06232		-0.0294846	0.985431
IPI:IPI00151462.3	MAP1LC3B2	Microtubule-associated proteins 1A/1B light chain 3 beta 2	5650	8	C	UR	1009.1	1588.5	2220.58	2072.45	1128.76	1165.08		1.57418	2.20055	0.968826	1.7788		0.654596	1.13787	-0.0456903	0.830908		0.304453	0.984388
IPI:IPI00009273.5	ABI3	ABI gene family member 3	2880	6	C	UR	985.335	1179.57	1847.64	2561.41	2478.69	1227.78		1.19713	1.87514	2.01884	2.08621		0.259575	0.906997	1.01353	1.06089		0.63655	0.983942
IPI:IPI00007797.3	FABP5L9;FABP5L2;FABP5;FABP5L7	Fatty acid-binding protein, epidermal	4530	181	C	UR	24050.2	56246.1	50751.2	111492	81388.6	60214.6		2.3387	2.11022	1.35164	1.85158		1.2257	1.07739	0.434713	0.888755		0.830209	0.983074
IPI:IPI00024190.3	SOLH	Isoform 1 of Calpain-15	5957	1	C	UR	24.1005	25.3676	37.8457	47.8728	42.5264	19.2957		1.05258	1.57033	2.20393	2.48101		0.073924	0.651066	1.14008	1.31093		0.607002	0.980997
IPI:IPI00220171.5	MAPT	Isoform Fetal-tau of Microtubule-associated protein tau	266	52	C	UR	7177.39	40854.4	31457.4	6834.2	6931.23	7719.59		5.6921	4.38285	0.897875	0.885306		2.50896	2.13187	-0.155413	-0.175752		1.17677	0.978058
IPI:IPI00013679.1	DUT	Isoform 1 of Deoxyuridine 5'-triphosphate nucleotidohydrolase, mitochondrial	347	165	C	UR	23549.5	26766.9	38723.6	54853.8	40969.2	23289.1		1.13662	1.64435	1.75916	2.35534		0.184754	0.717517	0.814885	1.23594		0.499819	0.976727
IPI:IPI00293157.4	SIVA1	Isoform 1 of Apoptosis regulatory protein Siva	2355	10	C	UR	1612.19	1424.25	1612.45	6637.19	5939.9	1714.65		0.883426	1.00016	3.46421	3.87087		-0.178819	0.000232647	1.79252	1.95266		0.806853	0.976446
IPI:IPI00465256.4	AK3	GTP:AMP phosphotransferase mitochondrial	1521	81	C	UR	13440.6	24203.4	40657.3	38008.1	22841.9	29705.3		1.80077	3.02496	0.76895	1.27951		0.848612	1.59692	-0.379038	0.355587		0.234787	0.976252
IPI:IPI00106642.4	SDF2L1	Dihydropyrimidinase-like 2	181	208	C	UR	23907.9	51648.5	65320.2	55098.2	33008.3	38911.5		2.16031	2.73216	0.848292	1.41599		1.11124	1.45004	-0.237368	0.501809		0.436936	0.975925
IPI:IPI00903155.1	-	SWAP-70 protein, isoform CRA_b	16	1	C	UR	104.41	303.678	304.833	245.156	199.927	185.021		2.90851	2.91958	1.08056	1.32502		1.54028	1.54576	0.111784	0.406011		0.826033	0.975885
IPI:IPI00014399.2	FHL3	Four and a half LIM domains protein 3	3809	20	C	UR	4134.72	4297.2	6590.28	8414.17	2646.47	3474.67		1.0393	1.59389	0.761646	2.42157		0.0556073	0.67255	-0.392807	1.27594		-0.1686	0.974248
IPI:IPI00219129.9	NQO2	Ribosyldihydronicotinamide dehydrogenase [quinone]	4296	23	C	UR	8279.97	6866.26	12036.4	9574.62	3301.28	3609.24		0.829261	1.45368	0.914675	2.65281		-0.270101	0.539707	-0.12867	1.40752		-0.199385	0.973613
IPI:IPI00009997.1	B3GNT1	N-acetyllactosaminide beta-1,3-N-acetylglucosaminyltransferase	2303	11	C	UR	1931.24	3434.08	5527.76	3659.82	2659.85	2724.5		1.77817	2.86229	0.976271	1.3433		0.830396	1.51717	-0.0346466	0.425781		0.397875	0.971474
IPI:IPI00220173.2	MAPT	Isoform Tau-B of Microtubule-associated protein tau	266	7	C	UR	480.36	2915.78	1741.98	582.038	541.833	551.166		6.06999	3.62641	0.983067	1.05601		2.60169	1.85854	-0.0246386	0.0786265		1.28853	0.968583
IPI:IPI00395604.1	LIPI	Isoform 2 of Lipase member I	6226	6	C	UR	1986.09	5877.05	5149.08	2929.51	1658.55	1991.78		2.95911	2.59257	0.832697	1.4708		1.56516	1.37438	-0.264136	0.556601		0.650513	0.965492
IPI:IPI00169340.1	GIMAP7	GTPase IMAP family member 7	4391	10	C	UR	1654.56	1539.49	1624.49	7194.46	8228.85	1857.9		0.930453	0.981826	4.42911	3.87236		-0.103995	-0.0264607	2.14702	1.95321		1.02151	0.963376
IPI:IPI00025202.6	FMNL1	Isoform 2 of Formin-like protein 1	16	58	C	UR	10582.3	9671.54	11110.2	41533.8	37416.3	11554.5		0.913936	1.04989	3.23824	3.5946		-0.129836	0.0702316	1.69521	1.84583		0.782688	0.958031
IPI:IPI00015476.1	SLC1A4	Neutral amino acid transporter A	3788	25	C	UR	6579.57	4977.42	14343.1	12314.1	6611.76	7159.77		0.756496	2.17994	0.92346	1.7199		-0.402595	1.12429	-0.114879	0.782326		-0.258737	0.953309
IPI:IPI00012429.3	C9orf5	Protein of unknown function UPF0118 family protein	3530	9	C	UR	425.01	854.935	1040.01	877.813	847.151	573.459		2.01156	2.44702	1.47727	1.53073		1.00832	1.29103	0.562929	0.614223		0.785623	0.952626
IPI:IPI00005707.6	MRC2	C-type mannose receptor 2	4926	9	C	UR	937.609	3576.71	2951.1	2340.63	1651.83	1977.1		3.81471	3.14747	0.835481	1.18387		1.93157	1.65419	-0.259321	0.243511		0.836127	0.948853
IPI:IPI00015934.1	KLF5	Krueppel-like factor 5	899	1	C	UR	161.676	158.729	258.203	369.791	94.5568	158.502		0.981772	1.59704	0.596565	2.33304		-0.0265398	0.6754	-0.745248	1.22221		-0.385894	0.948805
IPI:IPI00794288.1	MX1	cDNA FLJ35689 fis, clone SPLEN2019379, highly similar to INTERFERON-REGULATED RESISTANCE GTP-BINDING PROTEIN MXA	134	102	C	UR	19011.4	17809.8	26504.6	60856.3	17996.2	22789.8		0.936796	1.39414	0.78966	2.67033		-0.0941935	0.479378	-0.340696	1.41702		-0.217445	0.948198
IPI:IPI00006288.1	SLIT2	Isoform 1 of Slit homolog 2 protein	5850	2	C	UR	108.487	171.973	373.473	184.498	213.506	172.5		1.58519	3.44256	1.23772	1.06955		0.66466	1.78348	0.30768	0.0970088		0.48617	0.940245
IPI:IPI00789455.3	KATNAL1	Katanin p60 ATPase-containing subunit A-like 1	732	12	C	UR	1568.28	2293.34	3726.3	3160.36	1789.46	2042.47		1.46233	2.37604	0.876125	1.54732		0.548267	1.24856	-0.190791	0.629774		0.178738	0.939167
IPI:IPI00304937.4	GIMAP5	cDNA FLJ55992, highly similar to GTPase, IMAP family member 5	4908	14	C	UR	1616.18	1517	1571.67	6862.65	8063.95	1815.56		0.938633	0.97246	4.44158	3.77991		-0.0913668	-0.0402896	2.15107	1.91835		1.02985	0.939031
IPI:IPI00010800.2	NES	Nestin	16	75	C	UR	13110.4	11779.5	46213.4	32519.8	28753.1	31234.1		0.898485	3.52494	0.920568	1.04116		-0.154433	1.8176	-0.119404	0.0581964		-0.136919	0.937898
IPI:IPI00021408.1	NUDT4;NUDT4P1	Isoform 2 of Diphosphoinositol polyphosphate phosphohydrolase 2	5490	26	C	UR	4010.51	9452.3	9368.7	7976.96	6721.5	5105.64		2.35688	2.33604	1.31649	1.56238		1.23688	1.22406	0.396691	0.643747		0.816786	0.933905
IPI:IPI00027412.4	CEACAM6	Carcinoembryonic antigen-related cell adhesion molecule 6	5504	2	C	UR	343.21	333.783	731.143	950.581	382.498	554.972		0.972533	2.13031	0.68922	1.71284		-0.0401811	1.09106	-0.536963	0.776395		-0.288572	0.933728
IPI:IPI00099834.4	UBN1	Isoform 1 of Ubinuclein-1	319	12	C	UR	1574.81	3265.9	3326.98	5133.93	4565.46	2987.72		2.07384	2.11262	1.52807	1.71834		1.0523	1.07904	0.611715	0.781019		0.832009	0.930027
IPI:IPI00237706.4	MADD	Isoform 5 of MAP kinase-activating death domain protein	3420	1	C	UR	178.168	222.485	588.583	342.008	209.575	311.326		1.24874	3.30353	0.673169	1.09855		0.32047	1.72401	-0.570959	0.135604		-0.125245	0.929806
IPI:IPI00384992.7	MYL4	Myosin light chain 4	2477	15	C	UR	2338.61	1936.73	2249.47	9135.74	10843.2	2439.34		0.828154	0.961883	4.44514	3.74517		-0.272028	-0.0560662	2.15223	1.90503		0.9401	0.924482
IPI:IPI00015260.1	NELL2	Protein kinase C-binding protein NELL2	3309	6	C	UR	829.139	2672.63	2348.33	1337.92	855.97	1056.32		3.22338	2.83225	0.810332	1.26659		1.68857	1.50195	-0.303415	0.340945		0.69258	0.921447
IPI:IPI00001633.1	FLRT2	Leucine-rich repeat transmembrane protein FLRT2	6533	2	C	UR	312.865	991.06	775.841	691.065	736.468	478.258		3.16769	2.47979	1.5399	1.44496		1.66343	1.31022	0.622834	0.531032		1.14313	0.920627
IPI:IPI00045798.3	GPX7	Glutathione peroxidase 7	490	17	C	UR	3311.7	6790.05	8579.22	6626.13	3706.86	4835.63		2.05032	2.59058	0.766572	1.37027		1.03585	1.37327	-0.383506	0.454463		0.326172	0.913869
IPI:IPI00217469.3	HIST1H1A	Histone H1.1	286	14	C	UR	9361.48	6795.44	13388.2	4948.41	1534.82	1995.57		0.725894	1.43014	0.769114	2.4797		-0.46217	0.516153	-0.378731	1.31016		-0.420451	0.913159
IPI:IPI00219930.7	CRABP1	Cellular retinoic acid-binding protein 1	2483	71	C	UR	10884.1	31131.8	26001.7	22667.1	22422	15315.2		2.8603	2.38896	1.46404	1.48004		1.51617	1.25638	0.549951	0.565636		1.03306	0.91101
IPI:IPI00027683.2	OTX2	Isoform 1 of Homeobox protein OTX2	4533	9	C	UR	2462.47	11739.5	6807.46	5311.87	5078.12	4158.73		4.76737	2.76448	1.22107	1.27728		2.25319	1.46701	0.288151	0.353077		1.27067	0.910044
IPI:IPI00018298.3	IFIT2	Interferon-induced protein with tetratricopeptide repeats 2	441	14	C	UR	3228.82	4431.15	7703.49	4840.71	3668.17	3274.35		1.37237	2.38585	1.12027	1.47837		0.456674	1.25451	0.163852	0.56401		0.310263	0.909258
IPI:IPI00218247.3	TIMP3	Metalloproteinase inhibitor 3	5053	33	C	UR	6837.76	19069.2	28251.8	6553.32	6875.16	7683.55		2.78881	4.13173	0.89479	0.852903		1.47965	2.04675	-0.16038	-0.229547		0.659634	0.9086
IPI:IPI00026241.1	BST2	Bone marrow stromal antigen 2	5312	11	C	UR	1810.74	4593.34	3505.5	3072.69	2366.42	1700.84		2.53672	1.93595	1.39132	1.80657		1.34296	0.953041	0.476459	0.853255		0.909711	0.903148
IPI:IPI00332662.1	RUNDC2B	30 kDa protein	6733	1	C	UR	63.2072	128.363	124.303	140.294	148.978	78.9313		2.03083	1.9666	1.88744	1.77742		1.02207	0.9757	0.91643	0.829784		0.969249	0.902742
IPI:IPI00107104.1	CXorf26	UPF0368 protein Cxorf26	2763	56	C	UR	9184.46	17365.7	18218.7	20419.7	20064.7	11631		1.89077	1.98364	1.72511	1.75563		0.918974	0.988153	0.786684	0.811987		0.852829	0.90007
IPI:IPI00022967.3	KIAA1826	Coiled-coil domain-containing protein KIAA1826	4557	2	C	UR	414.38	471.704	595.207	746.171	618.153	308.169		1.13834	1.43638	2.00589	2.4213		0.186927	0.522437	1.00424	1.27578		0.595585	0.899111
IPI:IPI00013079.2	EMILIN1	EMILIN-1	4176	11	C	UR	2407.13	2593.75	5165.99	3536.76	2258.11	2182.88		1.07753	2.14612	1.03446	1.62023		0.107725	1.10173	0.0488829	0.696196		0.0783042	0.898963
IPI:IPI00657797.3	SEPT1	Septin-1	16	36	C	UR	4796.48	4131.69	4645.89	17050.9	17982.9	4752.47		0.8614	0.968604	3.78391	3.5878		-0.215244	-0.046021	1.91988	1.8431		0.852316	0.898539
IPI:IPI00028127.1	ETS1	Isoform c-ETS-1A of Protein C-ets-1	705	14	C	UR	2783.49	2425.8	2618.4	10177.3	8765.23	2769.71		0.871496	0.94069	3.16467	3.6745		-0.198434	-0.0882094	1.66206	1.87755		0.731811	0.894669
IPI:IPI00219067.4	GSTM2	Glutathione S-transferase Mu 2	3786	44	C	UR	6737.33	20240.6	16180.5	13152.6	10899.6	9140.23		3.00425	2.40162	1.19249	1.43898		1.587	1.26401	0.253973	0.525046		0.920488	0.894526
IPI:IPI00023137.1	TOR1B	Torsin-1B	2657	19	C	UR	5315.72	7622.36	9981	9932.08	4956.54	5403.24		1.43393	1.87764	0.917327	1.83817		0.519973	0.908919	-0.124491	0.878271		0.197741	0.893595
IPI:IPI00002405.4	OAS3	2'-5'-oligoadenylate synthetase 3	797	101	C	UR	18486.7	23196	41783.2	43495.4	22106.4	28544.9		1.25474	2.26018	0.774443	1.52375		0.327388	1.17644	-0.368769	0.60763		-0.0206903	0.892033
IPI:IPI00100930.2	C12orf43	cDNA FLJ58610	1647	14	C	UR	1831.79	2976.5	3318.22	3439.51	2333.08	1809.72		1.62491	1.81146	1.28919	1.90058		0.700363	0.857155	0.366469	0.926437		0.533416	0.891796
IPI:IPI00384250.2	ARPP-21	Isoform 1 of cAMP-regulated phosphoprotein 21	3298	4	C	UR	119.053	334.643	213	483.747	434.074	251.393		2.81087	1.78912	1.72667	1.92427		1.49102	0.839249	0.787997	0.944308		1.13951	0.891779
IPI:IPI00742863.2	TSEPA	Uncharacterized protein C6orf190	4992	58	C	UR	8956.58	8249.18	8885.79	39520.3	38320.4	11426.4		0.921019	0.992096	3.35367	3.45868		-0.118697	-0.0114479	1.74574	1.79022		0.813522	0.889388
IPI:IPI00027484.2	CD2	T-cell surface antigen CD2	5931	19	C	UR	1856.68	1634.04	1903.28	8805.98	8458.88	2632.38		0.880087	1.0251	3.2134	3.34525		-0.184282	0.0357626	1.6841	1.74212		0.749909	0.888939
IPI:IPI00422254.4	AKAP7	cDNA FLJ61410, highly similar to A-kinase anchor protein 7 isoform gamma	3600	7	C	UR	1517.35	4129.42	4091.93	2621.85	1658.61	2064.86		2.72147	2.69676	0.803255	1.26975		1.44439	1.43123	-0.316069	0.344541		0.564158	0.887884
IPI:IPI00339297.1	GALNT4	Polypeptide N-acetylgalactosaminyltransferase 4	247	12	C	UR	3195.61	6908.3	7804.31	4776.18	2779.22	3408.13		2.16181	2.4422	0.815468	1.40141		1.11224	1.28818	-0.2943	0.486877		0.40897	0.887528
IPI:IPI00218487.3	GJA1	Gap junction alpha-1 protein	6259	7	C	UR	927.173	1065.42	1763.37	1600.45	1018.66	889.67		1.14911	1.90188	1.14499	1.79893		0.200512	0.927425	0.19533	0.847135		0.197921	0.88728
IPI:IPI00645440.2	TRAF3IP3	Isoform 2 of TRAF3-interacting JNK-activating modulator	5117	4	C	UR	471.191	537.626	565.115	2379.96	2494.67	834.381		1.14099	1.19933	2.98985	2.85237		0.190291	0.262233	1.58007	1.51216		0.885181	0.887196
IPI:IPI00293616.3	DDX3Y;LOC100130220	ATP-dependent RNA helicase DDX3Y	1877	14	C	UR	1539.39	1457.25	1539.15	6026.9	5576	1763.89		0.946641	0.999844	3.16119	3.41682		-0.0791104	-0.000224942	1.66047	1.77266		0.79068	0.886215
IPI:IPI00030821.4	SIX6	Homeobox protein SIX6	5166	8	C	UR	1070.79	1319.55	1361.95	3150.71	3363.96	1179.74		1.23231	1.27191	2.85144	2.67068		0.30137	0.346998	1.51169	1.41721		0.906531	0.882103
IPI:IPI00419815.1	GDF6	Growth/differentiation factor 6	753	7	C	UR	1107.51	2359.39	2557.11	1957.63	1134.81	1334.28		2.13036	2.30888	0.850504	1.46718		1.09109	1.20719	-0.233611	0.553047		0.428742	0.880121
IPI:IPI00144003.2	SALL2	Sal-like protein 2	899	14	C	UR	1743	2676.71	4113.94	3700.7	2220.54	2584.08		1.53569	2.36026	0.859316	1.43212		0.618888	1.23895	-0.21874	0.518147		0.200074	0.878548
IPI:IPI00020885.1	DYNLT3	Dynein light chain Tctex-type 3	6908	3	C	UR	1265.78	1945	2118.34	1753.29	742.245	871.184		1.5366	1.67355	0.851996	2.01254		0.619743	0.742907	-0.231082	1.00902		0.194331	0.875961
IPI:IPI00219532.1	ELMO1	Isoform 1 of Engulfment and cell motility protein 1	181	43	C	UR	7273.66	7479.63	8480.09	29167.4	29421.5	10139.2		1.02832	1.16586	2.90176	2.8767		0.0402854	0.221398	1.53693	1.52441		0.788606	0.872906
IPI:IPI00006377.4	POMP	Proteasome maturation protein	3599	13	C	UR	3918.97	2906.24	4859.88	9230.52	7051.85	3417.11		0.741583	1.24009	2.06369	2.70127		-0.431321	0.310446	1.04523	1.43364		0.306952	0.872041
IPI:IPI00909283.1	CDH11	cDNA FLJ58514, highly similar to Cadherin-11	4485	2	C	UR	116.555	197.015	209.026	199.043	74.2248	106.889		1.69032	1.79337	0.69441	1.86215		0.757295	0.842672	-0.52614	0.896967		0.115577	0.869819
IPI:IPI00060801.1	RAB39B	Ras-related protein Rab-39B	4670	2	C	UR	263.859	273.971	284.666	1008.08	1051.08	326.198		1.03832	1.07886	3.22221	3.09039		0.054256	0.109503	1.68805	1.62779		0.871154	0.868647
IPI:IPI00019849.1	CD1B	Isoform 1 of T-cell surface glycoprotein CD1b	5486	7	C	UR	1134.31	979.742	1090.2	4119.87	3202.92	1187.84		0.863734	0.961113	2.69642	3.46837		-0.211341	-0.0572221	1.43105	1.79426		0.609853	0.868518
IPI:IPI00747462.2	EPB41L2	cDNA FLJ54004, moderately similar to Band 4.1-like protein 2	16	2	C	UR	259.041	1186.9	643.284	787.449	670.573	587.733		4.5819	2.48333	1.14095	1.33981		2.19595	1.31228	0.190233	0.422026		1.19309	0.86715
IPI:IPI00024684.1	MX2	Interferon-induced GTP-binding protein Mx2	134	26	C	UR	4634.93	3429.68	5259.49	12374.4	3255.43	4225.04		0.739964	1.13475	0.770509	2.92882		-0.434474	0.182375	-0.376117	1.55032		-0.405295	0.866349
IPI:IPI00216654.2	NOLC1	Isoform Beta of Nucleolar phosphoprotein p130	92	176	C	UR	30605.6	35807.4	63197	62167.6	62055.2	38677.9		1.16996	2.06488	1.60441	1.60732		0.226462	1.04606	0.682043	0.684653		0.454252	0.865357
IPI:IPI00017567.3	ENG	Isoform Long of Endoglin	5258	7	C	UR	1546.43	2913.06	2717.3	1982.5	837.42	1054.02		1.88373	1.75714	0.794501	1.88089		0.913594	0.813232	-0.331879	0.911419		0.290857	0.862325
IPI:IPI00013829.1	TRIAP1	TP53-regulated inhibitor of apoptosis 1	5126	1	C	UR	78.706	69.256	126.786	159.05	104.901	77.5347		0.879933	1.61088	1.35296	2.05134		-0.184535	0.68785	0.436114	1.03657		0.12579	0.862208
IPI:IPI00020418.1	RRAS	Ras-related protein R-Ras	1001	11	C	UR	2274.21	3536.48	4273.93	3332.58	1554.7	1896.63		1.55504	1.8793	0.819717	1.75711		0.636949	0.910198	-0.286802	0.813201		0.175073	0.8617
IPI:IPI00221108.5	TYMS	Thymidylate synthase	1161	75	C	UR	13645	12574.4	23353.1	22896.1	20701.9	11970.8		0.921539	1.71148	1.72937	1.91266		-0.117883	0.775242	0.790244	0.935582		0.33618	0.855412
IPI:IPI00010692.3	PER3	Period circadian protein homolog 3	5458	7	C	UR	1460.29	3172.39	3301.54	2213.12	2315.67	1531.32		2.17244	2.26088	1.51221	1.44524		1.11932	1.17688	0.596654	0.531306		0.857985	0.854095
IPI:IPI00168894.2	STEAP2	Isoform 1 of Metalloreductase STEAP2	6613	7	C	UR	1045.44	2134.56	2566.21	1817.27	1293.63	1367.26		2.04178	2.45467	0.946148	1.32913		1.02983	1.29553	-0.0798626	0.410485		0.474983	0.853007
IPI:IPI00748145.2	GNAI2	Isoform 1 of Guanine nucleotide-binding protein G(i), alpha-2 subunit	2739	61	C	UR	7530.8	9518.08	13283.1	20639.8	20242.3	11209.7		1.26389	1.76384	1.80578	1.84124		0.337867	0.818717	0.852626	0.880681		0.595247	0.849699
IPI:IPI00464978.1	IRS2	Insulin receptor substrate 2 insertion mutant (Fragment)	16	25	C	UR	4783.1	6051.63	8937.81	8453.6	4500.61	4894.76		1.26521	1.86862	0.919475	1.72707		0.339378	0.901975	-0.121118	0.788328		0.10913	0.845152
IPI:IPI00640298.1	ARHGEF18	113 kDa protein	1769	2	C	UR	60.5595	113.116	103.677	236.135	180.191	125.402		1.86785	1.71199	1.43691	1.88302		0.901378	0.775671	0.522967	0.913052		0.712172	0.844361
IPI:IPI00219962.2	TCF7	Isoform 2L of Transcription factor 7	69	11	C	UR	1561.73	1879.37	1914.02	6675.75	5142.87	2544.85		1.20339	1.22558	2.02089	2.62324		0.267104	0.293461	1.01499	1.39135		0.641049	0.842405
IPI:IPI00173461.1	JPH1	Junctophilin-1	877	25	C	UR	5041.55	16619.1	13032.5	9131.83	7605.97	7346.64		3.29643	2.58502	1.0353	1.24299		1.7209	1.37017	0.0500477	0.313819		0.885475	0.841997
IPI:IPI00006675.2	ABCC4	Isoform 1 of Multidrug resistance-associated protein 4	1110	27	C	UR	6413.34	7170.75	15652.6	12659.4	8168.04	9662.43		1.1181	2.44063	0.84534	1.31017		0.161048	1.28725	-0.242396	0.389751		-0.040674	0.838503
IPI:IPI00013929.1	TCF3	Isoform E12 of Transcription factor E2-alpha	145	15	C	UR	3073.4	4562.3	5104.21	6545.67	4705.1	3407.6		1.48445	1.66077	1.38077	1.9209		0.569926	0.731852	0.465469	0.941785		0.517698	0.836819
IPI:IPI00550792.4	BIN2	Isoform 1 of Bridging integrator 2	1184	12	C	UR	1796.57	1508.56	1638.9	6554.87	5711.57	1883.79		0.839689	0.912238	3.03196	3.47962		-0.252073	-0.132517	1.60025	1.79893		0.674088	0.833206
IPI:IPI00152850.2	JAM3	junctional adhesion molecule 3 precursor	1271	7	C	UR	1171.9	4566.46	3334.89	1933.74	1828.5	1738.45		3.89663	2.84571	1.0518	1.11234		1.96223	1.50879	0.0728591	0.153592		1.01754	0.831191
IPI:IPI00019487.3	NUDT15	Probable 7,8-dihydro-8-oxoguanine triphosphatase NUDT15	5329	12	C	UR	2129.48	2259.7	5263.47	3936.86	3444.89	3076.46		1.06115	2.47172	1.11976	1.27967		0.0856301	1.30551	0.163187	0.355774		0.124408	0.830644
IPI:IPI00291412.1	PPM1F	Protein phosphatase 1F	2131	38	C	UR	7609.88	9704.54	14775.4	12597	7019.85	7735.24		1.27526	1.94161	0.907515	1.62852		0.350786	0.957252	-0.140006	0.703562		0.10539	0.830407
IPI:IPI00304710.6	SPHKAP	Isoform 1 of A-kinase anchor protein SPHKAP	3979	5	C	UR	604.263	835.642	1200.82	938.764	475.709	593.584		1.38291	1.98725	0.801418	1.58152		0.467708	0.990771	-0.319373	0.66131		0.0741678	0.826041
IPI:IPI00329213.2	INPP5D	Isoform 1 of Phosphatidylinositol-3,4,5-trisphosphate 5-phosphatase 1	16	22	C	UR	3420.13	3325.23	3798.42	13874.4	14298	4903.24		0.972253	1.11061	2.91603	2.82964		-0.040597	0.151348	1.54401	1.50062		0.751705	0.825983
IPI:IPI00010133.3	CORO1A	Coronin-1A	525	111	C	UR	17977.3	16032	16249.1	81934.2	59674.3	23568		0.891791	0.903868	2.53201	3.4765		-0.165222	-0.145817	1.34028	1.79764		0.587529	0.82591
IPI:IPI00413344.3	CFL2	Cofilin-2	815	28	C	UR	7299.66	14051.6	18415.9	13802.4	7816.67	11097.6		1.92497	2.52284	0.704357	1.24373		0.944833	1.33505	-0.505622	0.314671		0.219606	0.824861
IPI:IPI00291278.8	IFI44	Interferon-induced protein 44	4581	3	C	UR	1139.52	1336.09	2016.5	1996.49	1247.58	1126.41		1.1725	1.7696	1.10757	1.77244		0.229591	0.823427	0.1474	0.825734		0.188496	0.82458
IPI:IPI00299738.1	PCOLCE	Procollagen C-endopeptidase enhancer 1	3438	2	C	UR	46.7065	238.625	117.202	74.4059	43.6936	59.5539		5.10903	2.50933	0.733682	1.24939		2.35305	1.3273	-0.446774	0.321221		0.953138	0.824261
IPI:IPI00304999.4	ROR2	Tyrosine-protein kinase transmembrane receptor ROR2	5849	1	C	UR	124.344	199.922	414.982	292.165	282.09	311.221		1.60781	3.33737	0.906398	0.93877		0.6851	1.73871	-0.141784	-0.0911561		0.271658	0.823778
##IPI:IPI00376255.4	HTR3E	Isoform 3 of 5-hydroxytryptamine receptor 3E	6701	10	C	UR	1954.56	2806.32	3734.09	5160.45	7313.33	3155.21		1.43578	1.91045	2.31786	1.63553		0.521836	0.933913	1.21279	0.709761		0.867314	0.821837
IPI:IPI00783872.2	CAPRIN1	Isoform 1 of Caprin-1	4208	342	C	UR	74071.6	64249.5	143231	79667.9	47067.2	49424.7		0.867397	1.93368	0.952301	1.6119		-0.205235	0.951351	-0.0705102	0.688766		-0.137873	0.820059
IPI:IPI00219138.1	PTPN22	Isoform 2 of Tyrosine-protein phosphatase non-receptor type 22	6251	1	C	UR	206.459	170.029	187.479	788.225	957.904	229.771		0.823549	0.908069	4.16895	3.43048		-0.280074	-0.139126	2.05968	1.77841		0.889805	0.819642
IPI:IPI00001641.3	ORC6L	Origin recognition complex subunit 6	5483	22	C	UR	5143.53	7209.94	7667.25	12250.6	13156.9	5873.5		1.40175	1.49066	2.24004	2.08574		0.487228	0.57595	1.16353	1.06056		0.825378	0.818255
IPI:IPI00304875.2	HIRIP3	Isoform 1 of HIRA-interacting protein 3	1292	30	C	UR	4317.14	5757.9	9213.85	11068	10028.1	7607.89		1.33373	2.13425	1.31812	1.45481		0.415467	1.09373	0.39848	0.540826		0.406973	0.817277
IPI:IPI00012510.2	EMILIN2	EMILIN-2	1713	2	C	UR	327.908	243.073	599.527	830.462	330.609	489.045		0.741284	1.82834	0.67603	1.69813		-0.431901	0.870534	-0.564841	0.763947		-0.498371	0.81724
IPI:IPI00009804.1	SATB1	DNA-binding protein SATB1	16	44	C	UR	8712.1	8144.3	9697.8	35053.8	27573.1	12634.4		0.934826	1.11314	2.18238	2.77447		-0.0972298	0.154637	1.1259	1.47221		0.514337	0.813425
IPI:IPI00000155.6	N-PAC	Isoform 1 of Nuclear protein NP60	2387	67	C	UR	9427.4	21602.6	20792.9	26911.9	23515.3	19261		2.29147	2.20558	1.22088	1.39722		1.19627	1.14116	0.287917	0.482562		0.742095	0.81186
IPI:IPI00024650.1	SLC16A1	Monocarboxylate transporter 1	235	23	C	UR	3804.24	10746.2	9292.03	7389.93	6385.21	5864.52		2.8248	2.44255	1.08879	1.26011		1.49815	1.28839	0.122721	0.333548		0.810434	0.810967
IPI:IPI00166053.1	SLC34A3	Sodium-dependent phosphate transport protein 2C	2992	1	C	UR	167.107	1182.89	852.339	378.114	335.017	629.907		7.07864	5.10056	0.531852	0.60027		2.82347	2.35066	-0.910905	-0.736318		0.956284	0.807169
IPI:IPI00030257.3	C2orf43	UPF0554 protein C2orf43	2703	14	C	UR	2802.24	4260.07	4460.27	4268.01	4862.78	2223.51		1.52024	1.59168	2.18698	1.91949		0.604297	0.670551	1.12894	0.940725		0.86662	0.805638
IPI:IPI00297357.1	PINX1	Isoform 1 of Pin2-interacting protein X1	3173	26	C	UR	4102.6	8300.31	6801.33	9237.05	6973.36	5015.56		2.02318	1.65781	1.39035	1.84168		1.01663	0.729278	0.475443	0.881021		0.746035	0.80515
IPI:IPI00028108.1	RGS19	Regulator of G-protein signaling 19	1139	6	C	UR	558.162	629.279	834.569	1318.68	1299.1	647.256		1.12741	1.49521	2.00709	2.03734		0.173016	0.580347	1.0051	1.02669		0.58906	0.803517
IPI:IPI00003921.2	EPB41	Isoform 1 of Protein 4.1	16	162	C	UR	24175.7	65112.3	59636.1	43063.9	31979.1	34895		2.6933	2.46678	0.916438	1.2341		1.42937	1.30263	-0.125891	0.303459		0.651741	0.803043
IPI:IPI00386591.5	C14orf149	Probable proline racemase	5564	22	C	UR	3248.75	6229.52	6451.53	5490.09	2897.19	3591.26		1.91751	1.98585	0.806734	1.52874		0.939236	0.989757	-0.309836	0.61234		0.3147	0.801048
IPI:IPI00218697.2	EPB41	Isoform 2 of Protein 4.1	16	2	C	UR	418.413	1074.22	951.768	674.249	495.592	505.38		2.56737	2.27471	0.980632	1.33414		1.36029	1.18568	-0.0282157	0.415913		0.666037	0.800798
IPI:IPI00031063.1	MAF1	Repressor of RNA polymerase III transcription MAF1 homolog	6129	6	C	UR	1015.61	1956.7	1720.38	1749.62	1483.91	979.011		1.92663	1.69394	1.51572	1.78713		0.946076	0.760381	0.600007	0.837645		0.773041	0.799013
IPI:IPI00012756.1	IFIT5	Interferon-induced protein with tetratricopeptide repeats 5	441	21	C	UR	6097	6609.5	10277.1	12157.8	5943.35	6770.23		1.08406	1.6856	0.877865	1.79577		0.116442	0.753262	-0.187929	0.844605		-0.0357435	0.798934
IPI:IPI00306048.5	ATAD3B	Isoform 1 of ATPase family AAA domain-containing protein 3B	1245	9	C	UR	1140.86	1926.87	2535.88	1955.4	1593.7	1436.81		1.68896	2.22278	1.10919	1.36093		0.756137	1.15236	0.149511	0.444594		0.452824	0.79848
IPI:IPI00043598.2	IKIP	Isoform 4 of Inhibitor of nuclear factor kappa-B kinase-interacting protein	3607	42	C	UR	8937.36	20929.9	25754.3	15810.5	12873.6	15079.9		2.34184	2.88165	0.853693	1.04845		1.22764	1.52689	-0.228211	0.0682561		0.499717	0.797574
IPI:IPI00297169.1	LCP2	Lymphocyte cytosolic protein 2	5292	24	C	UR	3562.73	3291.28	3606.31	14667.2	13594	4919.89		0.923808	1.01223	2.76307	2.9812		-0.114334	0.0175403	1.46627	1.5759		0.675969	0.796718
IPI:IPI00163187.1	FSCN1	Fascin	3168	312	C	UR	34103.2	77101.7	105808	85222.1	71225.5	87896.2		2.26083	3.10258	0.810337	0.969577		1.17686	1.63347	-0.303407	-0.0445732		0.436724	0.794448
IPI:IPI00797279.1	UHRF1	ubiquitin-like with PHD and ring finger domains 1 isoform 2	2332	144	C	UR	20695	27234.5	29803.2	51237	40876	24566.4		1.31599	1.44012	1.6639	2.08565		0.396153	0.526185	0.734568	1.0605		0.56536	0.793342
IPI:IPI00220994.3	H2AFY2	Core histone macro-H2A.2	601	141	C	UR	18886.7	47232.9	52420.6	38520.7	28598.4	35603.7		2.50086	2.77553	0.803242	1.08193		1.32242	1.47276	-0.316093	0.113607		0.503164	0.793185
IPI:IPI00292020.3	SRM	Spermidine synthase	279	78	C	UR	11598.3	20680.6	23160.6	18732.7	18624	12479.2		1.78307	1.9969	1.4924	1.50111		0.834365	0.997759	0.577638	0.586033		0.706001	0.791896
IPI:IPI00024167.1	ESF1	ESF1 homolog	16	89	C	UR	23203.1	28014.1	37309.3	37788.8	29956.1	20309.9		1.20734	1.60794	1.47495	1.86061		0.271836	0.685218	0.560667	0.895776		0.416251	0.790497
IPI:IPI00221209.2	STX2	Isoform 1 of Syntaxin-2	2115	9	C	UR	1642.64	3768.45	4444.44	3434.62	2676.92	3107.01		2.29414	2.70567	0.861574	1.10544		1.19795	1.43599	-0.214953	0.144624		0.491501	0.790304
IPI:IPI00031822.2	SLC5A6	Sodium-dependent multivitamin transporter	6748	2	C	UR	584.129	436.113	804.593	788.348	282.363	363.109		0.746604	1.37742	0.777626	2.17111		-0.421585	0.461972	-0.362852	1.11843		-0.392218	0.790201
IPI:IPI00031620.2	ICAM3	Intercellular adhesion molecule 3	3846	5	C	UR	556.379	647.865	728.398	1920.29	1936.74	841.082		1.16443	1.30918	2.30268	2.28312		0.219625	0.388659	1.20331	1.19101		0.711469	0.789832
IPI:IPI00028414.3	GMFG	Glia maturation factor gamma	4568	33	C	UR	5490.1	5136.69	5115.8	19744.9	22762	6170.2		0.935628	0.931823	3.68902	3.20004		-0.0959934	-0.101873	1.88324	1.67809		0.893622	0.788109
IPI:IPI00008840.4	POU3F1	POU domain, class 3, transcription factor 1	906	14	C	UR	2095.1	4184.4	4916.84	3521.62	2297	2776.02		1.99723	2.34683	0.827444	1.26859		0.998002	1.23071	-0.273267	0.343221		0.362367	0.786967
IPI:IPI00009943.2	TPT1	Tumor protein, translationally-controlled 1	4164	163	C	UR	27592.5	23136.4	47443.1	34617	26395.9	19993.3		0.838503	1.71942	1.32024	1.73143		-0.254112	0.781922	0.400797	0.791964		0.0733427	0.786943
IPI:IPI00219436.3	SEC11C	Signal peptidase complex catalytic subunit SEC11C	1673	9	C	UR	3008.56	3335.88	5956.26	4712.04	4908.21	3138.45		1.1088	1.97977	1.5639	1.50139		0.148994	0.985334	0.645145	0.5863		0.39707	0.785817
IPI:IPI00003293.1	DGKE	Diacylglycerol kinase epsilon	6489	2	C	UR	401.155	624.045	608	1092.51	1233.48	557.194		1.55562	1.51562	2.21374	1.96074		0.63749	0.599912	1.14648	0.971395		0.891986	0.785653
IPI:IPI00385449.4	PRKCA	Protein kinase C alpha type	195	47	C	UR	6573.54	5724.01	10413	18938.2	20585	10121.2		0.870765	1.58408	2.03385	1.87114		-0.199644	0.663643	1.02421	0.903919		0.412284	0.783781
IPI:IPI00332272.2	PTPRS	Isoform PTPS-MEB of Receptor-type tyrosine-protein phosphatase S	338	29	C	UR	4274.18	9756.65	10288.2	6240.07	4739.5	5073.31		2.2827	2.40706	0.934203	1.22998		1.19074	1.26727	-0.0981924	0.298635		0.546273	0.782953
IPI:IPI00856049.1	RPL22L1	60S ribosomal protein L22-like 1	1858	13	C	UR	3094.76	2844.81	3400.8	11295.5	9748.75	4199.57		0.919234	1.09889	2.32137	2.68968		-0.121495	0.136047	1.21498	1.42743		0.54674	0.781741
IPI:IPI00030781.1	STAT1	Isoform Alpha of Signal transducer and activator of transcription 1-alpha/beta	4210	250	C	UR	61739.5	51529.6	81650	101537	40850.9	45506.5		0.834629	1.32249	0.897694	2.23126		-0.260792	0.403259	-0.155705	1.15786		-0.208249	0.78056
IPI:IPI00295618.1	PECAM1	Isoform Long of Platelet endothelial cell adhesion molecule	2914	10	C	UR	2932.39	2427.42	2512.9	9860.73	8711.03	2865.74		0.827796	0.856946	3.03971	3.4409		-0.272653	-0.222724	1.60394	1.78279		0.665641	0.780032
IPI:IPI00023177.4	CHAF1A	Isoform 1 of Chromatin assembly factor 1 subunit A	909	68	C	UR	11411	18854.3	20504.9	26235.7	21496.2	15991.2		1.65229	1.79694	1.34425	1.64063		0.724468	0.845543	0.426803	0.714253		0.575636	0.779898
IPI:IPI00024242.3	EBF3	Isoform Long of Transcription factor COE3	990	16	C	UR	3308.45	6409.57	7427.31	5945.83	3384.06	4528.2		1.93733	2.24495	0.74733	1.31307		0.954072	1.16668	-0.420183	0.392941		0.266945	0.779812
IPI:IPI00428671.3	CHN2	cDNA FLJ59490, highly similar to Beta-chimaerin	251	11	C	UR	2321.79	2213.06	4458.1	3721.46	2122.44	2425.44		0.95317	1.92011	0.875074	1.53434		-0.0691949	0.941191	-0.192523	0.617622		-0.130859	0.779407
IPI:IPI00014898.3	PLEC1	Isoform 1 of Plectin-1	16	1161	C	UR	322432	273785	484963	418186	173671	214423		0.849125	1.50408	0.809946	1.95029		-0.235952	0.58888	-0.304103	0.963685		-0.270027	0.776282
IPI:IPI00783017.1	ZEB2	Zinc finger E-box-binding homeobox 2	830	21	C	UR	3269.55	11093	8944.05	6855.2	4461.23	6394.73		3.39282	2.73556	0.697642	1.07201		1.76249	1.45184	-0.519442	0.100315		0.621522	0.776076
IPI:IPI00011069.1	UNG	Isoform 2 of Uracil-DNA glycosylase	57	28	C	UR	5629.88	8098.3	7872.89	11454.3	8808.9	5466.16		1.43845	1.39841	1.61153	2.09549		0.524515	0.483789	0.688434	1.06729		0.606475	0.775539
IPI:IPI00011732.2	GFRA2	Isoform 1 of GDNF family receptor alpha-2	5140	5	C	UR	929.272	1971.92	1742.27	1898.45	1125.66	1215.36		2.12201	1.87488	0.926195	1.56205		1.08543	0.906795	-0.110613	0.643438		0.487408	0.775117
IPI:IPI00215610.2	MPP1	55 kDa erythrocyte membrane protein	3029	41	C	UR	5777.14	5742.11	6773.91	18740.6	18141	7512.66		0.993936	1.17254	2.41472	2.49454		-0.00877449	0.229633	1.27186	1.31877		0.631542	0.774202
IPI:IPI00028098.1	CCND1	G1/S-specific cyclin-D1	1206	10	C	UR	3475.24	12235.3	9981.59	3983.89	3586.06	3913.27		3.52071	2.8722	0.916385	1.01805		1.81586	1.52216	-0.125975	0.0258032		0.844945	0.77398
IPI:IPI00006071.4	CD38	Isoform 1 of ADP-ribosyl cyclase 1	4324	30	C	UR	4716.92	4122.31	4908.06	15982.4	24103.8	5694.77		0.873941	1.04052	4.23262	2.8065		-0.194392	0.0573078	2.08155	1.48877		0.943579	0.773041
IPI:IPI00022934.1	CD3D	T-cell surface glycoprotein CD3 delta chain	4020	6	C	UR	1170.68	1385.71	1509.34	3455.35	3792.9	1525.62		1.18368	1.28928	2.48614	2.26488		0.243279	0.366571	1.31391	1.17944		0.778592	0.773004
IPI:IPI00176903.2	PTRF	Isoform 1 of Polymerase I and transcript release factor	1976	56	C	UR	13293.6	13413.5	17703	20113.8	7148.99	9183.05		1.00902	1.33169	0.778498	2.19032		0.0129539	0.413262	-0.361234	1.13114		-0.17414	0.772201
IPI:IPI00162549.4	SP110	Isoform 1 of Sp110 nuclear body protein	4036	17	C	UR	2290.62	2608.16	4186.97	4000.39	3106.18	2507.32		1.13863	1.82788	1.23884	1.59548		0.187294	0.870168	0.308995	0.673995		0.248145	0.772081
IPI:IPI00328842.1	ARHGAP4	Rho GTPase activating protein 4, isoform CRA_b	3071	32	C	UR	5337.36	7161.34	9830.97	12628	12204	7987.14		1.34174	1.84192	1.52796	1.58104		0.424103	0.881207	0.611603	0.660875		0.517853	0.771041
IPI:IPI00743454.2	ACN9	Protein ACN9 homolog, mitochondrial	6422	5	C	UR	170.632	280.906	400.012	305.431	305.622	246.085		1.64627	2.3443	1.24194	1.24116		0.719199	1.22916	0.312592	0.31169		0.515895	0.770422
IPI:IPI00028564.1	GBP1	Interferon-induced guanylate-binding protein 1	899	63	C	UR	22189.3	19974.8	29726.4	25466.5	22452.7	11754.9		0.9002	1.33967	1.91007	2.16646		-0.151683	0.421881	0.933627	1.11534		0.390972	0.76861
IPI:IPI00061523.4	THAP11	THAP domain-containing protein 11	2491	6	C	UR	1171.81	1750.97	2297.3	1414.9	1298.62	956.285		1.49424	1.96047	1.35798	1.47958		0.579416	0.971201	0.441467	0.565188		0.510441	0.768194
IPI:IPI00552091.5	FBXO10	F-box protein 10	1919	1	C	UR	37.0995	47.1707	47.9156	49.5414	32.1275	22.1212		1.27146	1.29154	1.45234	2.23954		0.346491	0.369096	0.538379	1.1632		0.442435	0.76615
IPI:IPI00171705.1	NLGN4Y;LOC100133431	Isoform 1 of Neuroligin-4, Y-linked	5655	4	C	UR	1168.17	1307.78	2118.98	1925.29	1129.61	1208.05		1.11951	1.81393	0.935069	1.59372		0.16287	0.85912	-0.0968554	0.672396		0.0330071	0.765758
IPI:IPI00012851.2	ATP8B1	Probable phospholipid-transporting ATPase IC	6830	2	C	UR	594.399	457.424	1193.88	848.352	570.187	590.158		0.769557	2.00855	0.96616	1.4375		-0.3779	1.00615	-0.0496661	0.523562		-0.213783	0.764858
IPI:IPI00024251.1	FGF13	Isoform 1A of Fibroblast growth factor 13	6885	1	C	UR	283.109	843.102	717.021	510.73	450.814	448.111		2.97801	2.53267	1.00603	1.13974		1.57435	1.34066	0.00867618	0.188705		0.791513	0.764681
IPI:IPI00032267.2	RASA3	Ras GTPase-activating protein 3	6339	13	C	UR	3425.95	3358.89	5762.7	6240.67	6024.2	3648.57		0.980426	1.68207	1.65111	1.71044		-0.0285195	0.750241	0.723439	0.77437		0.347459	0.762305
IPI:IPI00181126.3	-	similar to high mobility group nucleosomal binding domain 2 isoform 1	888	54	C	UR	5459.84	15695.7	9420.94	14983.4	18822.1	9017.36		2.87475	1.7255	2.08732	1.66162		1.52344	0.787012	1.06165	0.732588		1.29254	0.7598
IPI:IPI00028262.1	ITPRIP	67 kDa protein	6291	7	C	UR	1787.09	1701.37	2477.09	2708.23	1022.75	1309.39		0.952034	1.3861	0.781089	2.06831		-0.0709154	0.471034	-0.356441	1.04846		-0.213678	0.759745
IPI:IPI00006714.3	PTPN13	Isoform 3 of Tyrosine-protein phosphatase non-receptor type 13	1606	60	C	UR	13329.5	23841.1	25003.8	22661.3	13238.6	14841.5		1.7886	1.87582	0.891999	1.52689		0.838828	0.907525	-0.164886	0.610594		0.336971	0.759059
IPI:IPI00002245.4	ACSS3	Isoform 1 of Acyl-CoA synthetase short-chain family member 3, mitochondrial	5853	5	C	UR	1073.04	1412.31	1528.86	1527.05	656.614	759.871		1.31618	1.42479	0.864112	2.00962		0.396353	0.510752	-0.210709	1.00692		0.092822	0.758837
IPI:IPI00024307.1	EFNB1	Ephrin-B1	60	14	C	UR	3787.03	13263.1	8622.22	6210.17	4825.53	4946.46		3.50224	2.27678	0.975552	1.25548		1.80828	1.18699	-0.035709	0.328236		0.886285	0.757614
IPI:IPI00024379.2	IRF7	Isoform A of Interferon regulatory factor 7	4491	3	C	UR	543.045	811.794	1064.19	1340.29	634.967	919.252		1.49489	1.95967	0.690743	1.45802		0.580042	0.970612	-0.533779	0.544013		0.0231316	0.757312
IPI:IPI00007676.3	HSD17B12	Estradiol 17-beta-dehydrogenase 12	2071	82	C	UR	29725.6	26341.9	38960.3	35549.6	15339.3	16316.7		0.886169	1.31066	0.940098	2.17872		-0.174347	0.390299	-0.0891167	1.12348		-0.131732	0.756891
IPI:IPI00062882.4	ATPBD3	Cytoplasmic tRNA 2-thiolation protein 1	2411	7	C	UR	1383.86	1308.39	1813.52	1761.83	1516.49	810.131		0.945464	1.31048	1.87191	2.17475		-0.0809054	0.390095	0.904509	1.12085		0.411802	0.755471
IPI:IPI00218943.5	RUNX1	Isoform AML-1H of Runt-related transcription factor 1	3252	32	C	UR	5124.47	4562.58	4815.35	17915.3	16023.4	5917.41		0.890352	0.939678	2.70784	3.02756		-0.167553	-0.0897621	1.43714	1.59815		0.634795	0.754196
IPI:IPI00418328.2	WIPF1	Isoform 1 of WAS/WASL-interacting protein family member 1	2572	16	C	UR	2192.51	2637.68	2645.58	5800.62	3455.99	2465.28		1.20304	1.20664	1.40187	2.35293		0.266686	0.271001	0.487348	1.23446		0.377017	0.752728
IPI:IPI00796740.2	PAN3	cDNA FLJ54494, highly similar to Homo sapiens PABP1-dependent poly A-specific ribonuclease subunit PAN3 (PAN3), mRNA	4511	1	C	UR	196.305	150.888	369.859	361.08	261.292	239.91		0.768641	1.8841	1.08913	1.50506		-0.379619	0.913878	0.12317	0.589825		-0.128225	0.751852
IPI:IPI00016443.1	C11orf79	Protein EMI5 homolog, mitochondrial	4447	2	C	UR	432.785	399.755	627.813	532.627	311.288	272.851		0.92368	1.45063	1.14087	1.95208		-0.114534	0.536684	0.190137	0.965012		0.0378011	0.750848
IPI:IPI00007060.1	COG8;PDF	Peptide deformylase, mitochondrial	3056	9	C	UR	2170.92	2801.26	3504.49	3523.55	3446.44	2015.61		1.29036	1.61429	1.70987	1.74813		0.367769	0.690898	0.77389	0.805813		0.57083	0.748356
IPI:IPI00008483.1	MAOA	Amine oxidase [flavin-containing] A	5129	5	C	UR	1194.61	2966.23	2589.48	1669.08	1343.64	1283.12		2.48301	2.16764	1.04717	1.3008		1.31209	1.11612	0.0664905	0.379397		0.689291	0.74776
IPI:IPI00012587.1	LOC731292;PTEN	Phosphatidylinositol-3,4,5-trisphosphate 3-phosphatase and dual-specificity protein phosphatase PTEN	6243	4	C	UR	282.673	758.959	942.42	900.076	901.269	1066.37		2.68494	3.33396	0.845175	0.844056		1.42489	1.73724	-0.242678	-0.244589		0.591105	0.746323
IPI:IPI00020191.1	PTP4A2	Isoform 1 of Protein tyrosine phosphatase type IVA 2	16	2	C	UR	1020.64	802.344	935.333	2516	3009.69	820.8		0.786119	0.916418	3.66678	3.0653		-0.347181	-0.125922	1.87451	1.61603		0.763665	0.745054
IPI:IPI00002773.4	JAK3	Isoform 2 of Tyrosine-protein kinase JAK3	2495	6	C	UR	809.562	614.867	814.013	2257.07	2819.81	808.246		0.759506	1.0055	3.4888	2.79255		-0.396867	0.00791026	1.80273	1.48158		0.702932	0.744748
IPI:IPI00027397.3	HN1L	Isoform 1 of Hematological and neurological expressed 1-like protein	2746	57	C	UR	8802.41	11356.9	19318.1	15566.6	14154.4	12209		1.2902	2.19464	1.15934	1.27501		0.367599	1.13398	0.213306	0.350509		0.290452	0.742246
IPI:IPI00010474.1	SLC7A11	Cystine/glutamate transporter	3922	7	C	UR	1784.18	3532.72	3742.57	3351.91	2054.13	2514.87		1.98002	2.09764	0.816794	1.33284		0.985518	1.06877	-0.291956	0.4145		0.346781	0.741634
IPI:IPI00028275.2	CKAP5	Isoform 1 of Cytoskeleton-associated protein 5	16	443	C	UR	102013	111409	194876	156128	96822.6	106708		1.09211	1.91031	0.90736	1.46313		0.127113	0.933803	-0.140253	0.549061		-0.00656991	0.741432
IPI:IPI00879932.1	-	94 kDa protein	6844	2	C	UR	1559.41	590.6	1097.27	2270.89	1728.19	572.686		0.378733	0.703644	3.01769	3.96533		-1.40075	-0.507082	1.59345	1.98744		0.0963493	0.74018
IPI:IPI00646906.1	GTPBP5	GTP binding protein 5	6861	4	C	UR	604.014	1056.43	1246.82	1145.42	975.578	847.606		1.74902	2.06422	1.15098	1.35136		0.806543	1.0456	0.202863	0.434411		0.504703	0.740005
IPI:IPI00844050.1	UQCC	Isoform 1 of Ubiquinol-cytochrome c reductase complex chaperone CBP3 homolog	4632	9	C	UR	1888.61	3206.9	4323.84	3788.17	4027.1	3109.64		1.69802	2.28943	1.29504	1.2182		0.763855	1.19499	0.372994	0.284754		0.568424	0.739871
IPI:IPI00005567.1	CACNB3	Isoform 3A of Voltage-dependent L-type calcium channel subunit beta-3	4101	2	C	UR	285.196	372.606	517.375	703.654	428.198	458.6		1.30649	1.8141	0.933707	1.53435		0.385697	0.859257	-0.0989583	0.61763		0.143369	0.738443
IPI:IPI00299412.7	CD97	Isoform 2 of CD97 antigen	4685	37	C	UR	5914.62	4518.77	8235.1	7637.37	3704.14	3823.06		0.764	1.39233	0.968894	1.99771		-0.388355	0.477501	-0.0455892	0.998348		-0.216972	0.737924
IPI:IPI00641582.1	BAG3	BAG family molecular chaperone regulator 3	548	31	C	UR	6854.27	12432.4	12070.6	7273.97	3885.14	4614.56		1.81382	1.76103	0.841931	1.57631		0.85903	0.816422	-0.248227	0.65655		0.305402	0.736486
IPI:IPI00301100.3	SLC43A3	cDNA FLJ54531, highly similar to Homo sapiens solute carrier family 43, member 3 (SLC43A3), mRNA	4971	16	C	UR	4140.8	3714.2	6682.01	8038.96	4436.72	4674.7		0.896976	1.6137	0.949092	1.71967		-0.156858	0.690373	-0.0753803	0.782135		-0.116119	0.736254
IPI:IPI00015902.3	PDGFRB	Beta-type platelet-derived growth factor receptor	2091	2	C	UR	422.616	602.908	936.183	755.481	602.943	606.12		1.42661	2.21521	0.994758	1.24642		0.51259	1.14744	-0.00758183	0.317792		0.252504	0.732618
IPI:IPI00291792.2	ITGB2	Integrin beta-2	2565	30	C	UR	4957.71	5194.02	5704.34	11859.5	12550.2	4952.09		1.04767	1.1506	2.53432	2.39485		0.0671777	0.202386	1.3416	1.25993		0.704389	0.73116
IPI:IPI00014482.3	ALKBH1	Alkylated DNA repair protein alkB homolog 1	1837	6	C	UR	1098.43	2051.39	2209.5	2164.63	1800.62	1581.2		1.86757	2.01151	1.13877	1.36898		0.901159	1.00828	0.187474	0.453101		0.544316	0.730689
IPI:IPI00025817.2	CCND3	G1/S-specific cyclin-D3	3332	1	C	UR	277.379	348.302	258.552	882.276	446.167	299.093		1.25569	0.932125	1.49173	2.94984		0.32848	-0.101404	0.57699	1.56064		0.452735	0.729616
IPI:IPI00032292.1	TIMP1	Metalloproteinase inhibitor 1	5334	3	C	UR	954.309	795.426	2132.66	1413.19	752.883	1148.76		0.83351	2.23477	0.655388	1.23019		-0.262729	1.16013	-0.60958	0.298878		-0.436154	0.729502
IPI:IPI00004924.3	DEF6	Differentially expressed in FDCP 6 homolog	16	36	C	UR	8327.87	7582.23	8120.63	25806.6	27281.4	9164.4		0.910465	0.975115	2.97689	2.81596		-0.135325	-0.0363559	1.57381	1.49363		0.71924	0.728636
IPI:IPI00307458.3	RHOF	Isoform 1 of Rho-related GTP-binding protein RhoF	6927	1	C	UR	205.474	199.956	295.647	714.939	798.835	374.798		0.973145	1.43885	2.13137	1.90753		-0.0392733	0.52492	1.09178	0.931707		0.526256	0.728313
IPI:IPI00029568.1	PTX3	Pentraxin-related protein PTX3	1004	3	C	UR	727.265	483.36	711.499	1998.12	591.385	712.772		0.664627	0.978322	0.829697	2.80331		-0.589383	-0.0316194	-0.269343	1.48713		-0.429363	0.727756
IPI:IPI00306452.5	TIPIN	TIMELESS-interacting protein	5519	9	C	UR	1288.13	2553.76	2348.91	3184.02	2420.09	2119.31		1.98253	1.8235	1.14192	1.50239		0.987345	0.866713	0.191466	0.587255		0.589405	0.726984
IPI:IPI00216044.1	RALY	Isoform 1 of RNA-binding protein Raly	724	10	C	UR	538.062	436.967	318.922	2030	1303.88	439.224		0.812113	0.592724	2.9686	4.62179		-0.300248	-0.754569	1.56978	2.20845		0.634767	0.726941
IPI:IPI00015609.1	C4orf30	Uncharacterized protein C4orf30	3423	17	C	UR	2461.04	3350.35	3147.02	6425.46	5768.82	3002.13		1.36136	1.27874	1.92158	2.1403		0.445044	0.354718	0.94229	1.09781		0.693667	0.726266
IPI:IPI00329115.2	C10orf47	Isoform 1 of Uncharacterized protein C10orf47	740	12	C	UR	3642.33	4540.93	6191.85	4644.54	2593.82	2887.62		1.24671	1.69997	0.898255	1.60843		0.318126	0.765509	-0.154803	0.685655		0.0816618	0.725582
IPI:IPI00654755.3	HBB	Hemoglobin subunit beta	4999	11	C	UR	2109.12	5494.99	6337.51	1266.37	1208.81	1391.73		2.60535	3.00481	0.868566	0.909925		1.38148	1.58727	-0.203292	-0.13618		0.589092	0.725547
IPI:IPI00647205.1	C6orf174	Uncharacterized protein C6orf174	1752	7	C	UR	1949.57	1889.38	2983.31	3928.24	4239.5	2198.82		0.969127	1.53024	1.92808	1.78652		-0.0452431	0.613758	0.947165	0.837154		0.450961	0.725456
IPI:IPI00884061.2	LOC552889	hypothetical protein LOC552889	4085	10	C	UR	1727.27	4356.78	3478.95	3646.99	3179.57	2702.81		2.52235	2.01413	1.17639	1.34933		1.33477	1.01016	0.234372	0.432246		0.78457	0.721202
IPI:IPI00719600.5	CYFIP2	Isoform 2 of Cytoplasmic FMR1-interacting protein 2	2187	50	C	UR	8452.67	9749.04	9659.43	35472.2	30847	14917.2		1.15337	1.14277	2.06788	2.37794		0.205853	0.192531	1.04815	1.24971		0.627003	0.721121
IPI:IPI00025380.2	ITGAL	Isoform 1 of Integrin alpha-L	4739	9	C	UR	1705.02	1529.89	1960.86	4692.47	5510.06	1986.43		0.897286	1.15005	2.77385	2.36226		-0.156361	0.201698	1.47189	1.24017		0.657765	0.720934
IPI:IPI00554660.1	PIPOX	Peroxisomal sarcosine oxidase	6476	2	C	UR	324.619	315.573	598.82	511.261	272.303	347.195		0.972133	1.84469	0.784294	1.47255		-0.0407737	0.883375	-0.350533	0.558314		-0.195653	0.720844
IPI:IPI00291816.3	GIMAP6	GTPase IMAP family member 6 (Fragment)	5692	2	C	UR	331.044	275.594	344.121	1306.45	1281.93	500.786		0.8325	1.0395	2.55984	2.6088		-0.264479	0.055893	1.35605	1.38339		0.545786	0.719639
IPI:IPI00514694.1	GLT25D2	Glycosyltransferase 25 family member 2	769	7	C	UR	964.798	1573.86	2131.32	1746.13	1222.24	1422.46		1.63128	2.20908	0.859244	1.22754		0.706008	1.14345	-0.21886	0.295773		0.243574	0.719611
IPI:IPI00641706.1	TUBB6	46 kDa protein	474	58	C	UR	9142.84	14871.3	15654	12676.2	6840.61	8008.91		1.62655	1.71216	0.854125	1.58276		0.701816	0.775817	-0.227481	0.662445		0.237168	0.719131
IPI:IPI00027604.1	CD96	Isoform 2 of T-cell surface protein tactile	5034	1	C	UR	437.788	326.434	415.361	1027.19	1049.57	359.7		0.745644	0.948772	2.9179	2.85569		-0.423441	-0.0758666	1.54493	1.51384		0.560746	0.718985
IPI:IPI00022792.3	MFAP4	Microfibril-associated glycoprotein 4	946	2	C	UR	351.67	388.448	373.23	653.487	381.233	256.572		1.10458	1.06131	1.48587	2.54699		0.143499	0.0858427	0.571309	1.34879		0.357404	0.717319
IPI:IPI00001449.2	PCDHB13	cDNA FLJ56534, highly similar to Protocadherin beta 13	6297	2	C	UR	277.641	384.603	663.86	363.11	298.012	321.212		1.38525	2.39107	0.927774	1.13044		0.470149	1.25766	-0.108155	0.176881		0.180997	0.71727
IPI:IPI00219217.3	LDHB	L-lactate dehydrogenase B chain	4023	338	C	UR	40043.9	117896	101366	120254	104786	112687		2.94417	2.53137	0.929885	1.06715		1.55786	1.33992	-0.104875	0.0937638		0.726493	0.716842
IPI:IPI00289083.5	CACHD1	Isoform 1 of VWFA and cache domain-containing protein 1	6221	7	C	UR	1502.63	2636.79	3006	2556.88	1691.87	1896.89		1.75478	2.00049	0.891918	1.34793		0.811293	1.00036	-0.165017	0.430748		0.323138	0.715552
IPI:IPI00028517.1	RAB33A	Ras-related protein Rab-33A	4670	2	C	UR	346.909	321.998	376.487	957.798	815.506	385.8		0.928192	1.08526	2.11381	2.48263		-0.107506	0.118043	1.07984	1.31187		0.486168	0.714956
IPI:IPI00216230.3	TMPO	Lamina-associated polypeptide 2, isoform alpha	16	167	C	UR	20657.8	44989.5	39422.5	44198.2	39333.3	31326.4		2.17785	1.90836	1.2556	1.41089		1.1229	0.932333	0.328372	0.496609		0.725637	0.714471
IPI:IPI00922250.1	C12orf75	Putative overexpressed in colon carcinoma 1 protein	4728	4	C	UR	691.088	909.679	1094.96	1694.56	1759.38	998.155		1.3163	1.5844	1.76263	1.69769		0.396488	0.663937	0.817731	0.763575		0.60711	0.713756
IPI:IPI00009809.1	PEX5L	Isoform 1 of PEX5-related protein	6029	3	C	UR	210.244	195.516	252.404	834.539	623.448	372.772		0.929948	1.20053	1.67246	2.23874		-0.104778	0.26367	0.741976	1.16269		0.318599	0.713178
IPI:IPI00400923.8	SH3PXD2A	SH3 multiple domains 1	899	40	C	UR	9869.81	14263.7	20194.9	18377.7	12071.7	14005.9		1.44518	2.04613	0.861901	1.31214		0.531254	1.0329	-0.214406	0.391922		0.158424	0.712409
IPI:IPI00015423.1	MAP1LC3A	Isoform 2 of Microtubule-associated proteins 1A/1B light chain 3A	5650	13	C	UR	3051.97	5148.89	5944.36	5127.57	3022.96	3721.19		1.68707	1.94771	0.812364	1.37794		0.754521	0.961781	-0.299802	0.462511		0.227359	0.712146
IPI:IPI00028339.1	NKX2-2	Homeobox protein Nkx-2.2	4160	6	C	UR	633.546	3331.88	1585.17	1062.18	868.199	992.554		5.2591	2.50206	0.874712	1.07015		2.39482	1.32312	-0.19312	0.0978108		1.10085	0.710464
IPI:IPI00302840.2	ATP1A3	Sodium/potassium-transporting ATPase subunit alpha-3	730	4	C	UR	981.807	848.943	797.515	2719.21	2084.05	825.064		0.864674	0.812293	2.52593	3.29576		-0.209772	-0.299928	1.33681	1.72061		0.56352	0.710341
IPI:IPI00218993.1	HSPH1	Isoform Beta of Heat shock protein 105 kDa	16	363	C	UR	90912.9	86064.3	141908	114260	97088.8	66721		0.946668	1.56092	1.45515	1.7125		-0.0790701	0.642399	0.541164	0.776108		0.231047	0.709253
IPI:IPI00178116.2	MBNL1	muscleblind-like 1 isoform e	592	6	C	UR	447.594	506.16	613.476	901.334	875.366	462.615		1.13085	1.37061	1.89221	1.94835		0.177403	0.454816	0.920074	0.96225		0.548739	0.708533
IPI:IPI00022388.2	DPYSL4	Dihydropyrimidinase-related protein 4	3623	25	C	UR	3679.6	15803.1	14467.8	4815.7	5598.51	7098.13		4.29479	3.93189	0.78873	0.678446		2.10259	1.97522	-0.342396	-0.559693		0.880095	0.707766
IPI:IPI00886838.1	LOC123855	similar to hCG2042536	6677	1	C	UR	6.43453	8.47888	13.9818	7.64268	4.11179	6.23149		1.31772	2.17293	0.659841	1.22646		0.398039	1.11964	-0.599811	0.294501		-0.100886	0.707072
IPI:IPI00219497.1	MYB	Isoform 4 of Myb proto-oncogene protein	698	12	C	UR	2888.69	2899.46	2976.15	9701.1	7891.13	3770.52		1.00373	1.03028	2.09285	2.57288		0.00536885	0.0430319	1.06547	1.36338		0.535419	0.703208
IPI:IPI00030782.1	STAT6	Isoform 1 of Signal transducer and activator of transcription 6	778	34	C	UR	8570.69	13508	13745.2	11065.4	7954.05	6705.28		1.57607	1.60374	1.18624	1.65025		0.656331	0.681445	0.246392	0.722686		0.451361	0.702065
IPI:IPI00021088.1	KCNAB2	Isoform 1 of Voltage-gated potassium channel subunit beta-2	1430	11	C	UR	1222.73	1398.56	1446.54	3983.99	4060.21	1783.67		1.1438	1.18304	2.27632	2.23359		0.193836	0.2425	1.18671	1.15937		0.690271	0.700933
IPI:IPI00215948.4	CTNNA1	Isoform 1 of Catenin alpha-1	37	143	C	UR	19819.3	43760.3	55786.3	45927	41771.3	48981.3		2.20796	2.81475	0.852801	0.937644		1.14272	1.493	-0.229719	-0.0928885		0.456499	0.700058
IPI:IPI00167002.3	ELF1	ETS-related transcription factor Elf-1	389	15	C	UR	3367.77	3039.9	3361.34	8155.93	7277.43	3093.14		0.902645	0.998091	2.35276	2.63678		-0.14777	-0.00275713	1.23436	1.39878		0.543294	0.69801
IPI:IPI00646130.2	SMARCA1	Isoform 2 of Probable global transcription activator SNF2L1	2841	1	C	UR	101.428	251.437	214.472	161.2	119.49	129.524		2.47897	2.11452	0.922532	1.24456		1.30974	1.08033	-0.11633	0.315632		0.596706	0.697983
IPI:IPI00414717.1	GLG1	Isoform 2 of Golgi apparatus protein 1	2249	122	C	UR	34523.1	65735.5	56717.6	40035.9	28341.5	25068.5		1.9041	1.64289	1.13056	1.59706		0.929111	0.716234	0.17704	0.675419		0.553076	0.695827
IPI:IPI00793443.1	IPO5	importin 5	11	303	C	UR	52958	60517.2	92843.8	70924.2	48735	47442.1		1.14274	1.75316	1.02725	1.49496		0.192497	0.809957	0.0387904	0.58011		0.115643	0.695034
IPI:IPI00514622.2	RANBP6	Ran-binding protein 6	11	40	C	UR	7735.08	9939.16	14544.5	11184.1	9043.53	8040.73		1.28495	1.88033	1.12472	1.39093		0.361708	0.910986	0.16956	0.476051		0.265634	0.693518
IPI:IPI00029096.1	TFDP2	Isoform Alpha of Transcription factor Dp-2	5619	3	C	UR	595.375	588.843	537.142	1822.93	1349.97	629.934		0.989029	0.902191	2.14303	2.89384		-0.0159156	-0.148495	1.09965	1.53299		0.54187	0.692246
IPI:IPI00219365.3	MSN	Moesin	16	691	C	UR	120153	150822	186891	196580	155838	117257		1.25525	1.55544	1.32903	1.67649		0.327974	0.637324	0.410373	0.745442		0.369174	0.691383
IPI:IPI00019472.4	SLC1A5	Neutral amino acid transporter B(0)	3873	44	C	UR	17105.4	11626.5	14921	17318.4	5579.23	5798.67		0.679698	0.872298	0.962157	2.98662		-0.557035	-0.197108	-0.055656	1.57851		-0.306345	0.690702
IPI:IPI00003896.1	PCDHGB5	Isoform 1 of Protocadherin gamma-B5	5550	2	C	UR	554.623	439.198	944.14	625.93	340.758	409.964		0.791886	1.70231	0.83119	1.52679		-0.336636	0.767493	-0.26675	0.610504		-0.301693	0.688999
IPI:IPI00009992.2	ADAP1	Arf-GAP with dual PH domain-containing protein 1	6589	2	C	UR	525.413	660.422	937.953	869.599	431.927	598.158		1.25696	1.78517	0.722095	1.45379		0.329936	0.836064	-0.469739	0.539824		-0.0699014	0.687944
IPI:IPI00304483.1	PAIP2	Polyadenylate-binding protein-interacting protein 2	3751	6	C	UR	1577.35	2191.69	2606.87	2811.35	2090.15	1791		1.38948	1.65269	1.16703	1.56971		0.474541	0.724816	0.222841	0.650498		0.348691	0.687657
IPI:IPI00033388.1	DAPK2	Death-associated protein kinase 2	6671	1	C	UR	143.719	112.033	243.622	228.236	114.068	149.322		0.779528	1.69513	0.763906	1.52848		-0.359327	0.761394	-0.388533	0.6121		-0.37393	0.686747
IPI:IPI00845373.1	NFKB2	Isoform 1 of Nuclear factor NF-kappa-B p100 subunit	2220	1	C	UR	247.844	266.376	495.459	447.803	325.53	345.519		1.07477	1.99908	0.942148	1.29603		0.104032	0.999333	-0.0859745	0.374099		0.00902861	0.686716
IPI:IPI00398779.5	PLEC1	Isoform 4 of Plectin-1	16	2	C	UR	1488.39	1140.19	2018.47	1906.95	753.031	998.785		0.766056	1.35614	0.753947	1.90927		-0.384478	0.43951	-0.407465	0.933021		-0.395972	0.686265
IPI:IPI00249304.3	PRIC285	Isoform 1 of Peroxisomal proliferator-activated receptor A-interacting complex 285 kDa protein	204	61	C	UR	10096.6	9716.25	15375.5	19212.9	9073.36	11301.1		0.962329	1.52284	0.802874	1.70009		-0.055398	0.606764	-0.316754	0.765612		-0.186076	0.686188
IPI:IPI00000643.1	BAG2	BAG family molecular chaperone regulator 2	4791	103	C	UR	21870.2	36782.4	39532.8	30574.3	25151.1	21371.7		1.68185	1.80761	1.17684	1.4306		0.750049	0.854084	0.23492	0.516618		0.492485	0.685351
IPI:IPI00167783.1	SFRS12IP1	Protein SFRS12IP1	6435	5	C	UR	967.174	937.901	1725.63	1507.04	1489.31	1039.89		0.969733	1.7842	1.43218	1.44923		-0.0443398	0.835276	0.518213	0.535287		0.236937	0.685281
IPI:IPI00064767.3	ARHGAP17	Isoform 1 of Rho GTPase-activating protein 17	400	75	C	UR	13462.8	31281.6	27813.1	21578.2	15354.2	17245.9		2.32356	2.06592	0.89031	1.25121		1.21634	1.04679	-0.16762	0.323321		0.524358	0.685054
IPI:IPI00100947.3	LENG1	Leukocyte receptor cluster member 1	4043	9	C	UR	1675.63	1682.72	2637.93	3134.67	2047.37	1914.5		1.00423	1.57429	1.0694	1.63733		0.00609152	0.654703	0.0968042	0.711346		0.0514479	0.683024
IPI:IPI00019318.1	PRR3	cDNA, FLJ95224, Homo sapiens proline rich 3 (PRR3), mRNA	4033	3	C	UR	932.578	1689.43	1602.94	2056.82	1369.13	1373.34		1.81157	1.71883	0.996934	1.49768		0.85724	0.781424	-0.0044294	0.582727		0.426405	0.682075
IPI:IPI00010477.1	LGALS9	Isoform Long of Galectin-9	5580	16	C	UR	3786.64	3431.17	3492.09	12089.2	14013.4	4339.15		0.906125	0.922213	3.22953	2.78608		-0.142218	-0.116828	1.69132	1.47823		0.774553	0.680703
IPI:IPI00217468.3	HIST1H1B	Histone H1.5	286	225	C	UR	44458.4	54653.7	60352.4	107402	125585	56774.9		1.22932	1.3575	2.21198	1.89172		0.297863	0.440955	1.14534	0.919696		0.721601	0.680325
IPI:IPI00465377.2	MXRA7	Isoform 1 of Matrix-remodeling-associated protein 7	1650	4	C	UR	702.692	2749.23	1731.19	1107.75	1187.96	1063.32		3.91243	2.46365	1.11722	1.04178		1.96806	1.3008	0.15991	0.0590565		1.06399	0.679928
IPI:IPI00029733.1	AKR1C1	Aldo-keto reductase family 1 member C1	2090	22	C	UR	7882.26	5623.48	10409.6	8518.28	3999.01	4384.19		0.713435	1.32064	0.912143	1.94295		-0.487146	0.401233	-0.132667	0.958252		-0.309907	0.679743
IPI:IPI00016095.1	MTERF	Transcription termination factor, mitochondrial	6858	1	C	UR	363.223	547.818	661.789	606.072	453.341	430.9		1.50821	1.82199	1.05208	1.40653		0.592841	0.865516	0.0732435	0.492136		0.333042	0.678826
IPI:IPI00064666.1	FAM84B	Protein FAM84B	5384	30	C	UR	3717.18	8964.02	6910.33	4939.41	3185.29	3587.16		2.41151	1.85902	0.88797	1.37697		1.26994	0.894546	-0.171417	0.461497		0.54926	0.678021
IPI:IPI00879200.1	TRBC2;TRBV7-2;TRBV3-1	V_segment translation product	2292	36	C	UR	4598.39	3995.74	4542.65	13805.5	13414.8	5332.7		0.868943	0.987878	2.51557	2.58884		-0.202666	-0.0175947	1.33089	1.37231		0.564111	0.677355
IPI:IPI00375505.3	ZEB1	Zinc finger E-box-binding homeobox 1	830	9	C	UR	1391.05	2375.98	2089.72	3610.48	2821.43	2129.72		1.70805	1.50226	1.32479	1.69528		0.772348	0.587135	0.405763	0.761527		0.589056	0.674331
IPI:IPI00032010.1	PKIG	cAMP-dependent protein kinase inhibitor gamma	4819	5	C	UR	369.526	563.042	551.278	688.362	349.395	403.319		1.52369	1.49185	0.866299	1.70674		0.607567	0.577104	-0.207062	0.771246		0.200252	0.674175
IPI:IPI00013831.1	CD48	CD48 antigen	6450	3	C	UR	499.263	407.071	370.807	1369.5	1156.64	399.734		0.815344	0.742709	2.89352	3.42603		-0.29452	-0.429132	1.53283	1.77654		0.619154	0.673703
IPI:IPI00305384.3	NUDT11	Diphosphoinositol polyphosphate phosphohydrolase 3-beta	5490	15	C	UR	2763.59	5837.72	5620.91	4386.61	3486.12	3508.51		2.11237	2.03392	0.993618	1.25028		1.07886	1.02426	-0.00923624	0.322248		0.534813	0.673254
IPI:IPI00019175.2	CITED2	Isoform 1 of Cbp/p300-interacting transactivator 2	5662	2	C	UR	262.867	533.869	438.333	357.532	206.665	234.502		2.03095	1.66751	0.881293	1.52464		1.02215	0.737694	-0.182306	0.608472		0.419923	0.673083
IPI:IPI00166130.1	PPPDE2	PPPDE peptidase domain-containing protein 2	6467	5	C	UR	1690.19	1879.1	2693.01	2883.89	2101.5	1807.47		1.11177	1.59332	1.16267	1.59554		0.152856	0.672034	0.217448	0.674044		0.185152	0.673039
IPI:IPI00024071.1	HSF1	Isoform Long of Heat shock factor protein 1	5412	19	C	UR	4040.76	6135.1	7816.32	6277.82	5120.39	4777.24		1.5183	1.93437	1.07183	1.31411		0.60246	0.951863	0.100076	0.394086		0.351268	0.672975
IPI:IPI00000867.5	CACNB2	Isoform 2d of Voltage-dependent L-type calcium channel subunit beta-2	4101	4	C	UR	645.888	1334.27	1439.77	1119.18	968.062	981.471		2.06579	2.22913	0.986338	1.14031		1.04669	1.15648	-0.0198462	0.189425		0.513424	0.672953
IPI:IPI00419721.1	EPM2AIP1	EPM2A-interacting protein 1	1159	10	C	UR	2155.8	1796.79	3801.73	2953.34	2504.97	2049.04		0.833468	1.76349	1.22251	1.44133		-0.262802	0.818433	0.289845	0.527399		0.0135218	0.672916
IPI:IPI00328243.2	PLD3	Phospholipase D3	2544	31	C	UR	7481.7	5631.12	14707.4	11085.2	7419.23	8581.21		0.752652	1.96578	0.86459	1.2918		-0.409944	0.975104	-0.209912	0.369382		-0.309928	0.672243
IPI:IPI00022133.2	EPB41L2	4.1G protein	16	2	C	UR	578.713	1434.31	1213.88	775.524	660.412	640.879		2.47845	2.09755	1.03048	1.21009		1.30944	1.06871	0.0433143	0.275119		0.676376	0.671913
IPI:IPI00641666.2	DENND2D	Isoform 1 of DENN domain-containing protein 2D	1880	7	C	UR	833.736	672.045	841.419	2850.89	3536.13	1137.34		0.806065	1.00922	3.10912	2.50663		-0.311033	0.0132338	1.63651	1.32575		0.662737	0.669491
IPI:IPI00006574.1	FAM49A	Protein FAM49A	899	80	C	UR	13880.4	21487.5	26176.4	20577.3	14531	15343.4		1.54805	1.88585	0.947052	1.34112		0.630448	0.915218	-0.0784842	0.423435		0.275982	0.669327
IPI:IPI00394808.1	EMB	Embigin	4147	8	C	UR	1897.18	2155.33	3405.23	4833.6	4286.83	3441.32		1.13607	1.79489	1.24569	1.40458		0.184052	0.843896	0.316949	0.490136		0.250501	0.667016
IPI:IPI00074020.3	CENPK	Centromere protein K	4440	4	C	UR	365.263	614.295	625.011	838.246	948.519	569.393		1.68179	1.71113	1.66584	1.47217		0.749996	0.774946	0.736252	0.557949		0.743124	0.666447
IPI:IPI00396154.3	PHF20L1	Putative uncharacterized protein PHF20L1	3534	19	C	UR	3627.5	4749.38	5399.38	6586.32	5963.14	3897.87		1.30927	1.48846	1.52985	1.68972		0.388764	0.573818	0.613386	0.756787		0.501075	0.665302
IPI:IPI00010746.1	PTDSS1	Phosphatidylserine synthase 1	4041	9	C	UR	2711.31	4240.61	4977.45	3844.03	4236.6	2810.85		1.56404	1.83581	1.50723	1.36757		0.645282	0.876417	0.5919	0.451613		0.618591	0.664015
IPI:IPI00031821.1	ITM2B	Integral membrane protein 2B	6881	3	C	UR	1421.52	1066.48	2097.07	1820.96	1249.24	1074		0.750239	1.47523	1.16317	1.69549		-0.414577	0.560941	0.218057	0.761705		-0.0982604	0.661323
IPI:IPI00001427.6	PDCD2	Programmed cell death protein 2	3712	16	C	UR	4478.13	4317.44	5269.94	9034.08	6781.57	4268.16		0.964117	1.17682	1.58887	2.11662		-0.0527203	0.23489	0.668005	1.08176		0.307642	0.658327
IPI:IPI00002208.2	STAMBPL1	Isoform 2 of AMSH-like protease	4769	12	C	UR	2684.14	4097.44	4529.99	4263.94	3676.33	2890.12		1.52654	1.68769	1.27203	1.47535		0.610263	0.755048	0.347137	0.561058		0.4787	0.658053
IPI:IPI00456628.5	RLTPR	Leucine-rich repeat-containing protein 16C	2760	12	C	UR	2378.52	2114.2	3013.54	5783.89	5219	2948.54		0.888872	1.26698	1.77003	1.96161		-0.169952	0.341395	0.823773	0.972039		0.32691	0.656717
IPI:IPI00003909.1	SLC2A3	Solute carrier family 2, facilitated glucose transporter member 3	6490	3	C	UR	1348.73	1626	2196.07	2402.62	1751.11	1576.75		1.20558	1.62825	1.11058	1.52378		0.269726	0.703322	0.151316	0.607655		0.210521	0.655489
IPI:IPI00013983.1	RET	Proto-oncogene tyrosine-protein kinase receptor ret	3451	1	C	UR	36.1861	38.2549	88.0582	55.7424	55.8752	54.7972		1.05717	2.43348	1.01967	1.01725		0.0802089	1.28302	0.0281059	0.0246729		0.0541574	0.653847
IPI:IPI00020451.3	IMPACT	Isoform 1 of Protein IMPACT	6110	9	C	UR	2846.15	2392.68	4027.63	3416.97	1596.29	1953.86		0.840672	1.41512	0.816993	1.74883		-0.250384	0.500919	-0.291604	0.80639		-0.270994	0.653655
IPI:IPI00328826.6	CADPS2	Putative uncharacterized protein CADPS2	430	27	C	UR	7858.4	6889.09	12358.3	10152.5	5484.67	6461.6		0.876653	1.57262	0.84881	1.57121		-0.189922	0.653173	-0.236487	0.651872		-0.213204	0.652522
IPI:IPI00024781.1	SERF2;HYPK	Small EDRK-rich factor 2	4028	10	C	UR	1905.07	2099.8	2062.03	3804.54	1841.57	1667.12		1.10222	1.08239	1.10464	2.2821		0.140408	0.114221	0.143578	1.19036		0.141993	0.652293
IPI:IPI00555883.2	DNM1L	Isoform 2 of Dynamin-1-like protein	1195	4	C	UR	627.807	1131.79	902.4	967.835	704.895	563.219		1.80277	1.43738	1.25155	1.7184		0.850213	0.523446	0.323712	0.781065		0.586963	0.652256
IPI:IPI00607685.1	NUDT4;NUDT4P1	Isoform 1 of Diphosphoinositol polyphosphate phosphohydrolase 2	5490	3	C	UR	935.392	1309.66	1626.23	1428.72	1353.15	1008.39		1.40012	1.73855	1.34189	1.41683		0.485549	0.797888	0.424268	0.502669		0.454909	0.650279
IPI:IPI00019640.1	VRK1	Serine/threonine-protein kinase VRK1	3044	104	C	UR	21500.4	21871.9	36640.6	41215.9	43192.8	28608.3		1.01728	1.70418	1.5098	1.4407		0.0247151	0.76908	0.594357	0.526767		0.309536	0.647923
IPI:IPI00007175.3	NIP7	Isoform 1 of 60S ribosome subunit biogenesis protein NIP7 homolog	6036	32	C	UR	5927.26	7615.59	10132.3	7577.8	7310.21	5287.93		1.28484	1.70944	1.38243	1.43304		0.36159	0.773524	0.46721	0.519076		0.4144	0.6463
IPI:IPI00894264.1	ROCK2	Putative uncharacterized protein ROCK2	195	1	C	UR	53.2805	61.2314	54.4508	27.2558	7.14437	11.3905		1.14923	1.02196	0.627222	2.39285		0.200664	0.0313456	-0.672952	1.25873		-0.236144	0.645039
IPI:IPI00017450.2	GTF2F1	General transcription factor IIF subunit 1	2247	72	C	UR	16456.7	18621.9	27987.4	25916.1	23485.8	18052.3		1.13157	1.70067	1.30099	1.43561		0.178325	0.766102	0.379606	0.521666		0.278966	0.643884
IPI:IPI00071318.1	LUC7L	Isoform 1 of Putative RNA-binding protein Luc7-like 1	1106	33	C	UR	6443.03	13539.6	14400	9527.89	8555.2	8722.38		2.10143	2.23497	0.980833	1.09235		1.07137	1.16026	-0.0279203	0.127435		0.521727	0.643846
IPI:IPI00031612.3	UTP23	Isoform 1 of rRNA-processing protein UTP23 homolog	3510	11	C	UR	2430.98	3510.38	3628.4	3959.5	3701.39	2421.88		1.44402	1.49257	1.52831	1.63489		0.530089	0.577795	0.61194	0.709191		0.571014	0.643493
IPI:IPI00178185.1	BICD2	Isoform 1 of Protein bicaudal D homolog 2	952	60	C	UR	15135.9	17230.3	24181.1	19558.3	15225.3	12806.8		1.13837	1.5976	1.18884	1.52718		0.186973	0.675905	0.249561	0.610871		0.218267	0.643388
IPI:IPI00024734.1	DNAL4	Dynein light chain 4, axonemal	5683	3	C	UR	878.279	908.476	1806.87	1257.67	937.108	1060.78		1.03438	2.05728	0.883414	1.18561		0.0487691	1.04074	-0.178838	0.245628		-0.0650346	0.643185
IPI:IPI00513864.3	ING5	Isoform 2 of Inhibitor of growth protein 5	4316	11	C	UR	1940.72	2702.16	3208.91	4774.93	5284.17	3237.04		1.39235	1.65346	1.63241	1.47509		0.477521	0.725491	0.707002	0.560804		0.592261	0.643148
IPI:IPI00007757.2	IKZF2	Isoform 1 of Zinc finger protein Helios	610	15	C	UR	3333.5	4130.29	3950.59	6239.24	5988.58	3032.37		1.23903	1.18512	1.97488	2.05755		0.309205	0.24503	0.981768	1.04092		0.645487	0.642977
IPI:IPI00790333.1	LOC100127983	hypothetical protein	6816	1	C	UR	99.5106	263.566	118.988	237.979	162.83	116.803		2.64862	1.19573	1.39406	2.03744		1.40524	0.257894	0.479289	1.02676		0.942266	0.642325
IPI:IPI00014478.1	ITGA7	Isoform Alpha-7X1X2B of Integrin alpha-7	1267	1	C	UR	79.5462	134.024	249.636	234.075	284.549	301.565		1.68486	3.13825	0.943574	0.776201		0.752626	1.64996	-0.0837919	-0.365498		0.334417	0.642231
IPI:IPI00012431.1	RNF26	RING finger protein 26	6713	1	C	UR	20.6541	16.1437	27.3444	18.5428	13.5506	10.0796		0.781622	1.32392	1.34436	1.83964		-0.355457	0.404817	0.426918	0.879421		0.0357307	0.642119
IPI:IPI00003445.1	CDKN3	Isoform 1 of Cyclin-dependent kinase inhibitor 3	5963	2	C	UR	527.653	687.96	1086.14	904.161	918.802	764.629		1.30381	2.05844	1.20163	1.18248		0.382735	1.04155	0.264994	0.24182		0.323865	0.641684
IPI:IPI00794397.1	CHMP4A	chromatin modifying protein 4A	402	4	C	UR	756.261	629.557	1069.13	1551.1	1133.01	902.042		0.83246	1.41371	1.25605	1.71954		-0.264547	0.499481	0.328894	0.782025		0.0321734	0.640753
IPI:IPI00395015.1	OXA1L	Isoform 2 of Mitochondrial inner membrane protein OXA1L	3296	6	C	UR	1142.46	2331.01	2551.03	1844.4	1462.48	1697.74		2.04034	2.23293	0.861428	1.08639		1.02881	1.15894	-0.215199	0.119536		0.406806	0.639236
IPI:IPI00073180.8	RAB37	Ras-related protein Rab-37	4670	1	C	UR	44.7186	31.5835	37.8749	123.36	157.046	43.1286		0.706272	0.846961	3.64134	2.86028		-0.501704	-0.239633	1.86447	1.51616		0.681383	0.638262
IPI:IPI00400986.6	KIAA1731	Isoform 1 of Leucine-rich repeat-containing protein KIAA1731	16	2	C	UR	191.514	266.189	351.324	337.393	225.423	255.878		1.38992	1.83446	0.880978	1.31857		0.475001	0.875352	-0.182821	0.398974		0.14609	0.637163
IPI:IPI00744182.2	SH3BP5	SH3 domain-binding protein 5	6773	2	C	UR	431.351	377.492	606.934	647.418	974.458	377.009		0.875139	1.40705	2.58471	1.71725		-0.192416	0.492677	1.37	0.780099		0.588792	0.636388
IPI:IPI00102821.4	MGC29506	Isoform 1 of Proapoptotic caspase adapter protein	3481	27	C	UR	4126.21	3547.95	3562.77	11135.7	11699.2	3982.23		0.859857	0.863449	2.93785	2.79635		-0.217832	-0.211818	1.55476	1.48354		0.668465	0.635863
##IPI:IPI00239405.4	SYNE2	Isoform 1 of Nesprin-2	5263	5	C	UR	638.393	1022.33	764.273	1368.21	794.921	678.436		1.60141	1.19718	1.1717	2.01671		0.679344	0.259643	0.228599	1.01201		0.453971	0.635824
IPI:IPI00470885.9	ARHGAP19	Isoform 2 of Rho GTPase-activating protein 19	3943	12	C	UR	1631.94	2607.26	2866.17	3620.37	4115.57	2635.6		1.59764	1.7563	1.56153	1.37364		0.675946	0.812536	0.642961	0.458006		0.659454	0.635271
IPI:IPI00184670.4	AMPD2	Isoform Ex1A-2-3 of AMP deaminase 2	490	3	C	UR	462.474	435.596	575.76	592.581	259.211	306.136		0.941882	1.24496	0.846718	1.93568		-0.0863816	0.316095	-0.240046	0.95284		-0.163214	0.634467
IPI:IPI00061623.1	SGTB	Small glutamine-rich tetratricopeptide repeat-containing protein beta	2378	13	C	UR	2161.5	3508.83	4519.05	3788.19	2991.21	3287.64		1.62333	2.0907	0.909835	1.15225		0.698957	1.06399	-0.136323	0.204456		0.281317	0.634222
IPI:IPI00221172.2	UBR7	Putative E3 ubiquitin-protein ligase UBR7	3864	58	C	UR	9669.66	12631.3	15472.5	25663.4	19114.7	17066.9		1.30628	1.60011	1.11999	1.50369		0.385466	0.678169	0.163482	0.588511		0.274474	0.63334
IPI:IPI00217470.1	FLI1	Isoform 2 of Friend leukemia integration 1 transcription factor	584	13	C	UR	2013.44	3135.95	3381.01	3435.41	3117.49	2401.16		1.55751	1.67922	1.29833	1.43073		0.63924	0.747792	0.376653	0.516751		0.507947	0.632271
IPI:IPI00456728.3	RANBP3	Isoform 2 of Ran-binding protein 3	2647	5	C	UR	1436.18	1958.9	1962.3	2982.1	1951.39	1696.68		1.36397	1.36633	1.15012	1.75761		0.447807	0.450309	0.201788	0.813614		0.324797	0.631962
IPI:IPI00013871.1	RRM1	Ribonucleoside-diphosphate reductase large subunit	3381	206	C	UR	31956.5	47818.6	46534.2	62968.3	67003.1	38183.6		1.49637	1.45617	1.75476	1.64909		0.581462	0.542182	0.811275	0.721673		0.696369	0.631927
IPI:IPI00328180.4	RAB34	Isoform 1 of Ras-related protein Rab-34	1443	24	C	UR	6390.22	7026.41	14055.4	12720.5	9107.32	11652.5		1.09956	2.19952	0.781576	1.09165		0.136922	1.13719	-0.355541	0.126516		-0.109309	0.631851
IPI:IPI00011593.1	FOSL2	Fos-related antigen 2	5099	6	C	UR	2593.55	4015.46	3500.5	2937.81	1680.25	1652.95		1.54825	1.34969	1.01652	1.77731		0.630637	0.432633	0.0236328	0.829698		0.327135	0.631165
IPI:IPI00018452.3	CPNE1	Copine-1	3039	141	C	UR	28500.7	27533.4	39876.6	47437.2	46003.5	27704		0.96606	1.39914	1.66054	1.71229		-0.0498146	0.484545	0.731649	0.775925		0.340917	0.630235
IPI:IPI00797373.4	DOCK8	Isoform 1 of Dedicator of cytokinesis protein 8	527	36	C	UR	7086.69	6176.08	6482.61	20241.1	19764.8	7740.65		0.871504	0.914759	2.55338	2.61491		-0.198421	-0.128537	1.35241	1.38676		0.576993	0.629112
IPI:IPI00218634.6	CD247	Isoform 1 of T-cell surface glycoprotein CD3 zeta chain	6658	1	C	UR	240.087	187.753	228.424	558.193	477.065	222.252		0.782021	0.951422	2.1465	2.51153		-0.354721	-0.071843	1.10199	1.32857		0.373634	0.628362
IPI:IPI00008708.5	RSL1D1	Ribosomal L1 domain-containing protein 1	231	144	C	UR	38048.6	52687.8	53131.9	48478.5	41960.9	28352.9		1.38475	1.39642	1.47995	1.70983		0.469626	0.481735	0.565549	0.773849		0.517587	0.627792
IPI:IPI00010141.4	POLE3	DNA polymerase epsilon subunit 3	4833	16	C	UR	1837.34	2433.06	2397.08	3967.68	2686.7	2169.93		1.32423	1.30465	1.23815	1.82848		0.405153	0.383659	0.308187	0.870647		0.35667	0.627153
IPI:IPI00014256.2	ARHGEF6	Isoform 1 of Rho guanine nucleotide exchange factor 6	3356	49	C	UR	10961.6	14743.5	12044.9	23666.6	21719.8	10903.5		1.34501	1.09883	1.992	2.17055		0.427621	0.135964	0.99422	1.11806		0.71092	0.627013
IPI:IPI00646377.1	EIF4G3	Isoform 1 of Eukaryotic translation initiation factor 4 gamma 3	375	69	C	UR	12275.2	31814.6	29411.3	23632.7	21523	23741.1		2.59178	2.39599	0.906571	0.995434		1.37394	1.26062	-0.141508	-0.00660232		0.616217	0.627011
IPI:IPI00220827.5	TMSB10	Thymosin beta-10	5461	4	C	UR	1300.72	2367.82	1758.17	1596.46	1338.06	905.179		1.82039	1.35169	1.47823	1.7637		0.864249	0.434764	0.563868	0.818601		0.714058	0.626683
IPI:IPI00016877.4	PLEKHO1	cDNA FLJ61462, highly similar to Homo sapiens CK2 interacting protein 1	2250	11	C	UR	1708.58	2270.16	3242.93	4041.81	2968.75	3219.53		1.32868	1.89803	0.922107	1.2554		0.409996	0.9245	-0.116994	0.328151		0.146501	0.626326
IPI:IPI00020944.1	FDFT1	Squalene synthetase	2157	77	C	UR	19101.9	15654.3	18212.1	37876.4	27797.9	15165.1		0.819515	0.953418	1.83302	2.4976		-0.287157	-0.0688189	0.874221	1.32054		0.293532	0.625863
IPI:IPI00654555.3	NOP2	NOP2 protein	1237	188	C	UR	36158.5	51095.7	56370.7	49069.6	40426.9	32167.4		1.4131	1.55899	1.25677	1.52545		0.498867	0.640611	0.329716	0.60923		0.414292	0.62492
IPI:IPI00738367.3	ZC3H12C	cDNA FLJ55575, moderately similar to Homo sapiens zinc finger CCCH-type containing 12A (ZC3H12A), mRNA	3842	2	C	UR	212.66	269.001	359.39	387.79	259.079	275.595		1.26493	1.68997	0.940071	1.4071		0.339063	0.757002	-0.0891576	0.492726		0.124953	0.624864
IPI:IPI00107555.4	PFN2	Profilin	2682	45	C	UR	5806.37	13267.5	12978.6	9920.14	7626.01	9324.86		2.28499	2.23523	0.817815	1.06384		1.19219	1.16043	-0.290154	0.0892784		0.451017	0.624852
IPI:IPI00031557.2	CTH	Isoform 1 of Cystathionine gamma-lyase	358	22	C	UR	4334.98	6685.95	7004.81	7784.51	4281.35	5296.47		1.54233	1.61588	0.80834	1.46975		0.625107	0.692321	-0.306965	0.555575		0.159071	0.623948
IPI:IPI00235003.1	FAS	Tumor necrosis factor receptor superfamily, member 6 isoform 1 variant (Fragment)	4300	8	C	UR	1650.12	3468.26	3423.97	2813.34	3966.64	2460.24		2.10182	2.07498	1.6123	1.14352		1.07164	1.0531	0.689118	0.193485		0.88038	0.623292
IPI:IPI00005657.1	PFDN6	Prefoldin subunit 6	4949	20	C	UR	3811.9	4477.73	6162.91	8378.74	7435.77	5712.84		1.17467	1.61676	1.30159	1.46665		0.232257	0.693101	0.380274	0.552525		0.306266	0.622813
IPI:IPI00555989.1	ATP11C	Isoform 3 of Probable phospholipid-transporting ATPase IG	369	53	C	UR	11439.2	21896.5	23510.2	20310.5	14566.3	17612.5		1.91416	2.05523	0.827043	1.15319		0.936714	1.0393	-0.273965	0.205626		0.331374	0.622463
IPI:IPI00009772.1	BET1L	BET1-like protein	3100	3	C	UR	621.297	761.706	1114.57	996.9	770.544	755.392		1.22599	1.79394	1.02006	1.31971		0.293951	0.843132	0.0286518	0.400223		0.161302	0.621678
IPI:IPI00006987.1	DDX24	ATP-dependent RNA helicase DDX24	16	136	C	UR	26264.1	27766.6	34623.7	52170.3	49652.4	29086.4		1.05721	1.31829	1.70707	1.79363		0.0802584	0.398668	0.771519	0.842884		0.425889	0.620776
IPI:IPI00784013.1	JAK1	Tyrosine-protein kinase JAK1	3027	44	C	UR	10029.6	18724.4	18227.5	11958.5	8547.51	9194.34		1.86691	1.81737	0.929649	1.30064		0.900655	0.861853	-0.105242	0.379219		0.397707	0.620536
IPI:IPI00184311.4	ENPP1	Ectonucleotide pyrophosphatase/phosphodiesterase family member 1	5340	17	C	UR	4452.85	7109.46	10007.6	8144.89	6765.91	7747		1.59661	2.24746	0.873359	1.05136		0.675011	1.1683	-0.195354	0.0722575		0.239829	0.620276
IPI:IPI00074045.3	C6orf192	Uncharacterized MFS-type transporter C6orf192	6766	1	C	UR	225.887	238.142	397.275	305.748	213.126	227.58		1.05425	1.75873	0.936488	1.34347		0.0762208	0.814537	-0.0946672	0.425969		-0.00922317	0.620253
IPI:IPI00024975.2	KIF15	Isoform 1 of Kinesin-like protein KIF15	828	123	C	UR	20942.2	33599.2	28811.5	52081.5	50976.7	30328.1		1.60438	1.37576	1.68084	1.71727		0.682014	0.460232	0.749183	0.780116		0.715598	0.620174
IPI:IPI00604620.3	NCL	Nucleolin	6	720	C	UR	157641	242511	225795	267496	195231	162628		1.53838	1.43234	1.20048	1.64483		0.621407	0.518371	0.263606	0.717942		0.442507	0.618156
IPI:IPI00420004.3	MYO1G	Isoform 1 of Myosin-Ig	16	56	C	UR	9556.63	8474.38	9690.71	24668.4	25325.2	10627.3		0.886754	1.01403	2.38303	2.32123		-0.173394	0.0201004	1.2528	1.21489		0.539702	0.617495
IPI:IPI00419541.4	GBP4	Guanylate-binding protein 4	899	12	C	UR	2506.07	1938.15	2199.75	6520.79	8359.59	2433.48		0.773382	0.877769	3.43524	2.67962		-0.370746	-0.188087	1.78041	1.42203		0.704832	0.616969
IPI:IPI00002526.2	DSE	cDNA FLJ56258, highly similar to Squamous cell carcinoma antigen recognized by T-cells 2	5787	1	C	UR	163.127	143.145	282.328	272.055	178.656	201.209		0.877506	1.73073	0.887913	1.3521		-0.188518	0.791377	-0.17151	0.435204		-0.180014	0.61329
IPI:IPI00301311.1	SET	Isoform 2 of Protein SET	4981	19	C	UR	2137.26	3666.53	3531.5	3843.93	3328.1	2715.93		1.71553	1.65235	1.2254	1.41533		0.778653	0.724519	0.293252	0.501136		0.535953	0.612827
##IPI:IPI00002803.5	PKN1	Serine/threonine-protein kinase N1	1701	7	C	UR	4796.94	1526.31	2235.87	2706.62	340.983	539.63		0.318184	0.466103	0.631883	5.0157		-1.65207	-1.10128	-0.662271	2.32645		-1.15717	0.612586
IPI:IPI00013683.2	TUBB3	Tubulin beta-3 chain	474	67	C	UR	13532.9	18543	28156.8	24990.6	17380.7	22281.2		1.37022	2.08062	0.780061	1.1216		0.454404	1.05701	-0.358341	0.165559		0.0480314	0.611285
IPI:IPI00245135.1	RNASEH2B	RNASEH2B protein	5247	51	C	UR	10440.5	10027.7	13268.4	24419.3	23708.7	13303.9		0.960462	1.27086	1.78209	1.8355		-0.0582001	0.345804	0.833567	0.876173		0.387684	0.610988
IPI:IPI00006557.8	PJA2	Isoform 1 of E3 ubiquitin-protein ligase Praja2	1684	19	C	UR	3227.81	3236.81	5225.49	4035.21	2921.37	2800.54		1.00279	1.6189	1.04315	1.44087		0.00401702	0.695011	0.0609401	0.526939		0.0324785	0.610975
IPI:IPI00025347.4	EMG1	Probable ribosome biogenesis protein NEP1	6388	36	C	UR	7780.48	9682.57	10774.2	13013.5	11558	7734.29		1.24447	1.38477	1.49438	1.68257		0.315531	0.46965	0.579551	0.750668		0.447541	0.610159
IPI:IPI00152564.2	RNF141	RING finger protein 141	1007	4	C	UR	901.519	1964.46	1733.65	1476.87	1260.17	1221.02		2.17906	1.92303	1.03206	1.20954		1.1237	0.943383	0.0455315	0.274456		0.584617	0.608919
IPI:IPI00554793.2	MYCBP	C-Myc-binding protein	16	9	C	UR	3375.73	3305.14	4448.67	6331.97	6544.4	3587.78		0.979089	1.31784	1.82408	1.76487		-0.0304881	0.398175	0.86717	0.819563		0.418341	0.608869
IPI:IPI00025695.1	CDC45L	CDC45-related protein	5004	18	C	UR	4759.27	4770.22	5805.19	9073.66	9476.66	4771.96		1.0023	1.21976	1.98591	1.90145		0.0033155	0.286603	0.989797	0.927103		0.496556	0.606853
IPI:IPI00376209.3	CPEB2	Isoform 1 of Cytoplasmic polyadenylation element-binding protein 2	4320	3	C	UR	398.7	335.203	635.447	560.035	320.037	385.297		0.84074	1.5938	0.830624	1.45352		-0.250269	0.672468	-0.267732	0.539546		-0.259	0.606007
IPI:IPI00290192.1	RNASEH2A	Ribonuclease H2 subunit A	892	61	C	UR	12665.7	12675	15703.7	28008.1	24804.6	15062.7		1.00073	1.23986	1.64676	1.85943		0.00105893	0.310178	0.719627	0.894864		0.360343	0.602521
IPI:IPI00156793.5	XPC	DNA repair protein complementing XP-C cells	80	29	C	UR	5586.94	5851.07	10275.8	12762.3	9322.08	10187.7		1.04728	1.83925	0.915033	1.25272		0.0666422	0.87912	-0.128105	0.32506		-0.0307312	0.60209
IPI:IPI00243221.2	NRD1	nardilysin isoform a	1462	157	C	UR	39996.3	42926.6	64635.8	45614.6	29420.1	32018		1.07326	1.61604	0.918861	1.42465		0.102005	0.692467	-0.122081	0.510612		-0.0100378	0.60154
IPI:IPI00383044.1	KBTBD7	Kelch repeat and BTB domain-containing protein 7	4430	2	C	UR	371.695	313.499	488.213	539.405	590.021	307.859		0.843431	1.31348	1.91653	1.75212		-0.245658	0.393391	0.938497	0.809099		0.346419	0.601245
IPI:IPI00294241.2	GTF3A	Transcription factor IIIA	6148	2	C	UR	710.155	670.383	787.234	1560.18	1380.88	751.878		0.943995	1.10854	1.83657	2.07504		-0.0831484	0.148659	0.877017	1.05314		0.396935	0.6009
IPI:IPI00640091.3	FYN	Isoform 2 of Proto-oncogene tyrosine-protein kinase Fyn	16	15	C	UR	1626.72	1654.16	1667.98	4666.72	4257.98	2080.38		1.01687	1.02536	2.04673	2.24321		0.0241328	0.036136	1.03332	1.16556		0.528727	0.600849
IPI:IPI00219097.4	HMGB2	High mobility group protein B2	2250	237	C	UR	45136.9	60824.5	58187.9	124948	99610	70031		1.34756	1.28914	1.42237	1.78418		0.430345	0.366412	0.508297	0.835262		0.469321	0.600837
IPI:IPI00218326.2	SP100	Isoform Sp100-C of Nuclear autoantigen Sp-100	2250	16	C	UR	3587.31	3536.67	5493.94	6081.1	4934.32	4051.52		0.985884	1.53149	1.21789	1.50094		-0.0205108	0.614939	0.284388	0.585869		0.131939	0.600404
IPI:IPI00020977.4	CTGF	Isoform 1 of Connective tissue growth factor	6831	1	C	UR	366.08	496.673	1092.87	352.517	337.917	458.604		1.35673	2.98533	0.736838	0.768674		0.440137	1.57789	-0.44058	-0.379556		-0.000221321	0.599167
IPI:IPI00515124.5	IFFO2	intermediate filament family orphan 2	6607	1	C	UR	28.72	31.9555	13.9951	15.7771	4.77861	3.35658		1.11266	0.487295	1.42365	4.70035		0.154009	-1.03713	0.509599	2.23277		0.331804	0.597817
IPI:IPI00062124.2	RPLP0P2	Similar to Acidic ribosomal phosphoprotein P0	1529	1	C	UR	344.208	368.781	659.868	502.573	444.787	421.121		1.07139	1.91706	1.0562	1.19342		0.0994837	0.938897	0.0788798	0.255098		0.0891818	0.596998
IPI:IPI00011550.1	ZCCHC3	Zinc finger CCHC domain-containing protein 3	4499	28	C	UR	4749.84	7689.23	8344.3	9298.19	6869.19	7141.32		1.61884	1.75675	0.961894	1.30203		0.69496	0.812912	-0.0560508	0.380759		0.319455	0.596836
IPI:IPI00009862.4	CDR2	Cerebellar degeneration-related protein 2	5181	4	C	UR	936.279	1480.12	1725.96	1361.43	1104.41	1097.82		1.58085	1.84342	1.006	1.24012		0.660704	0.882389	0.00863433	0.310481		0.334669	0.596435
IPI:IPI00328526.6	ARPP19	Isoform ARPP-19 of cAMP-regulated phosphoprotein 19	3164	9	C	UR	1744.12	2176.02	2911.82	3843.94	2976.41	2808.11		1.24763	1.66951	1.05993	1.36887		0.319193	0.739422	0.0839738	0.452986		0.201583	0.596204
IPI:IPI00018109.1	PTGS2	Prostaglandin G/H synthase 2	5762	3	C	UR	358.576	366.897	471.996	869.051	456.379	500.815		1.02321	1.31631	0.911273	1.73527		0.0330962	0.396496	-0.134045	0.795163		-0.0504746	0.595829
IPI:IPI00009906.5	ARMCX3	Armadillo repeat-containing X-linked protein 3	2510	28	C	UR	4748.84	8758.96	9752.95	11672	8608.09	10495.7		1.84444	2.05375	0.820154	1.11207		0.883184	1.03826	-0.286033	0.153253		0.298576	0.595758
IPI:IPI00307276.1	ADAMTS4	A disintegrin and metalloproteinase with thrombospondin motifs 4	2485	9	C	UR	1381.27	1588.03	2486.39	1939.71	1346.45	1529.47		1.14969	1.80008	0.880338	1.26822		0.201243	0.848057	-0.183871	0.342809		0.00868583	0.595433
IPI:IPI00220907.5	PKIA	cAMP-dependent protein kinase inhibitor alpha	6305	3	C	UR	167.181	308.846	274.96	846.844	602.362	611.226		1.84738	1.64468	0.985498	1.38548		0.885477	0.717811	-0.0210752	0.47039		0.432201	0.594101
IPI:IPI00328350.6	FAM129A	Protein Niban	828	164	C	UR	22629.4	47074.8	49214.9	53903.3	39114.1	51498.5		2.08025	2.17482	0.759519	1.0467		1.05676	1.1209	-0.396842	0.0658432		0.329957	0.59337
IPI:IPI00011997.4	C8orf33	Isoform 1 of UPF0488 protein C8orf33	107	13	C	UR	3728.16	3481.41	5061.39	4661.87	4337.93	2780.54		0.933815	1.35761	1.5601	1.67661		-0.098792	0.44107	0.641642	0.745544		0.271425	0.593307
IPI:IPI00024773.1	FARP1	Isoform 1 of FERM, RhoGEF and pleckstrin domain-containing protein 1	16	37	C	UR	10080.2	10899.8	17950	14243.5	9088.81	11150.1		1.08131	1.78072	0.815133	1.27743		0.112777	0.83246	-0.294893	0.353247		-0.091058	0.592853
IPI:IPI00328260.4	NSMAF	Protein FAN	3185	30	C	UR	6032.1	8146.74	9158.85	12280.3	9718.89	8202.46		1.35056	1.51835	1.18488	1.49715		0.433563	0.602506	0.244735	0.582217		0.339149	0.592362
IPI:IPI00023807.3	SEMA4D	Semaphorin-4D	4228	14	C	UR	2462.8	2734.55	2431.05	6921.99	4447.63	3008.58		1.11034	0.987108	1.47832	2.30075		0.151004	-0.0187199	0.563954	1.2021		0.357479	0.591692
IPI:IPI00019872.1	HSD17B2	Estradiol 17-beta-dehydrogenase 2	743	24	C	UR	6050.1	9306.39	14321.4	3820.57	3493.07	3986.91		1.53822	2.36713	0.876135	0.958278		0.621263	1.24314	-0.190775	-0.0614831		0.215244	0.590829
IPI:IPI00291643.3	SPRYD4	SPRY domain-containing protein 4	2968	14	C	UR	3390.53	2907.15	4478.83	4097.23	2171.91	2388.78		0.857432	1.32098	0.909213	1.7152		-0.221905	0.401611	-0.13731	0.778375		-0.179607	0.589993
IPI:IPI00013404.1	SMAD4	Mothers against decapentaplegic homolog 4	2904	27	C	UR	2283.1	8037.75	7516.57	5767.84	6886.31	8382.27		3.52054	3.29226	0.821533	0.6881		1.8158	1.71908	-0.28361	-0.53931		0.766094	0.589885
IPI:IPI00044369.2	PLXDC2	Isoform 1 of Plexin domain-containing protein 2	4474	8	C	UR	1703.03	2269.13	2696.4	2052.79	1356.52	1435.89		1.33241	1.5833	0.944724	1.42963		0.414035	0.662931	-0.0820349	0.515641		0.166	0.589286
IPI:IPI00064086.5	EEF1D	eukaryotic translation elongation factor 1 delta isoform 4	1810	249	C	UR	54786.5	53332.9	85092.7	73496.9	43967.9	50457.6		0.973468	1.55317	0.871383	1.45661		-0.0387947	0.635215	-0.198621	0.542612		-0.118708	0.588913
IPI:IPI00003802.2	MAN2A1	Alpha-mannosidase 2	899	70	C	UR	19810.3	15797.9	30736.5	23152.9	15565.9	15879.1		0.797459	1.55154	0.980276	1.45807		-0.326518	0.633702	-0.0287402	0.544064		-0.177629	0.588883
IPI:IPI00027693.4	SP140L	SP140 nuclear body protein-like	2250	11	C	UR	2049.52	1780.74	2420.74	3713.23	3464.91	1938.89		0.868857	1.18113	1.78706	1.91513		-0.202809	0.240162	0.837587	0.937444		0.317389	0.588803
IPI:IPI00219895.1	FXYD2	Isoform 2 of Sodium/potassium-transporting ATPase gamma chain	6506	3	C	UR	967.825	905.655	960.8	2300.45	2608.09	1009.95		0.935763	0.992741	2.5824	2.27779		-0.0957846	-0.0105101	1.36871	1.18763		0.636463	0.588561
IPI:IPI00306851.4	LRP4	Low-density lipoprotein receptor-related protein 4	2473	3	C	UR	325.78	417.168	772.921	485.63	519.188	509.868		1.28052	2.37252	1.01828	0.952462		0.35673	1.24642	0.0261332	-0.0702662		0.191432	0.588078
IPI:IPI00014878.9	PRKD1	Putative uncharacterized protein PRKD1	2869	13	C	UR	1841.16	2426.26	4179.74	3221.66	2733.71	3237.06		1.31779	2.27017	0.844504	0.995243		0.398119	1.1828	-0.243824	-0.00687986		0.0771476	0.587959
IPI:IPI00073357.1	FBXO4	Isoform 1 of F-box only protein 4	4400	9	C	UR	2225.21	1955.65	3016.83	2544.12	2454.24	1528.32		0.878861	1.35575	1.60584	1.66465		-0.186293	0.439092	0.68333	0.73522		0.248518	0.587156
IPI:IPI00465261.2	ERAP2	Isoform 1 of Endoplasmic reticulum aminopeptidase 2	211	93	C	UR	12013.9	12375.7	13067.1	50350	61836.1	24299		1.03012	1.08767	2.5448	2.0721		0.0428056	0.121234	1.34755	1.05109		0.695179	0.586165
IPI:IPI00219358.7	MPI	Isoform 1 of Mannose-6-phosphate isomerase	3412	30	C	UR	5438.03	6837.95	8678.83	8272.55	7787.98	5859.23		1.25743	1.59595	1.32918	1.41188		0.33048	0.674416	0.410538	0.497621		0.370509	0.586019
IPI:IPI00170972.2	C9orf64	UPF0553 protein C9orf64	2490	15	C	UR	5803.92	5855.52	6507.62	6024.66	3748.43	2999.59		1.00889	1.12125	1.24965	2.00849		0.0127697	0.165102	0.321521	1.00611		0.167145	0.585608
IPI:IPI00005587.2	MYOM2	Myomesin-2	3574	6	C	UR	1472.9	1899.53	2733.99	1973.8	1399.84	1627.96		1.28965	1.8562	0.859874	1.21244		0.366983	0.892348	-0.217803	0.277911		0.0745898	0.58513
IPI:IPI00307760.7	ZC3H8	Zinc finger CCCH domain-containing protein 8	5269	8	C	UR	2046.67	2651.2	3415.9	3386.57	3216.15	2511.63		1.29537	1.669	1.2805	1.34836		0.373367	0.738987	0.356711	0.431201		0.365039	0.585094
IPI:IPI00549725.6	PGAM1	Phosphoglycerate mutase 1	1400	212	C	UR	35237.8	57570.7	65650.2	56662.6	41711.1	46954.6		1.63378	1.86306	0.888328	1.20675		0.708211	0.897676	-0.170835	0.27113		0.268688	0.584403
IPI:IPI00018923.2	IKZF3	Isoform 1 of Zinc finger protein Aiolos	610	3	C	UR	611.507	575.237	622.998	1560.93	1597.31	707.657		0.940688	1.01879	2.25718	2.20577		-0.0882125	0.0268585	1.17452	1.14128		0.543155	0.584071
IPI:IPI00219468.4	PFN2	Isoform IIa of Profilin-2	2682	8	C	UR	1884.12	5355.45	4440.28	3021.55	2543.52	3172.12		2.84241	2.35669	0.801836	0.952533		1.50712	1.23676	-0.318621	-0.0701585		0.594248	0.583301
IPI:IPI00298105.4	EPHA3	Isoform 1 of Ephrin type-A receptor 3	730	11	C	UR	2140.34	3971.11	4300.39	3842.67	3663.66	3440.9		1.85536	2.00921	1.06474	1.11676		0.891702	1.00663	0.0904997	0.159323		0.491101	0.582975
IPI:IPI00018214.1	MAX	Isoform 1 of Protein max	3044	16	C	UR	4617.22	4698.1	4124.22	8900.88	4628.93	3545.7		1.01752	0.893226	1.30551	2.51033		0.0250529	-0.162903	0.384608	1.32788		0.204831	0.582487
IPI:IPI00414058.1	GRK5	G protein-coupled receptor kinase 5	1857	14	C	UR	3317.96	4981.86	5630	4777.25	3932.5	3620.31		1.50148	1.69683	1.08623	1.31957		0.586388	0.762838	0.119334	0.400067		0.352861	0.581453
IPI:IPI00025383.1	CD5	T-cell surface glycoprotein CD5	3004	5	C	UR	1417.67	592.361	678.801	3170.32	2236.45	677.993		0.417841	0.478815	3.29863	4.67604		-1.25897	-1.06246	1.72187	2.22529		0.231448	0.581413
IPI:IPI00103252.4	RWDD4A	RWD domain-containing protein 4A	5357	14	C	UR	3405.73	3167.27	4394.44	5191.28	3659.36	3001.36		0.929983	1.29031	1.21923	1.72964		-0.104724	0.367715	0.285975	0.790474		0.0906254	0.579095
IPI:IPI00304670.7	PSD4	Isoform 1 of PH and SEC7 domain-containing protein 4	4816	3	C	UR	742.595	871.89	985.334	1128.98	973.053	671.268		1.17411	1.32688	1.44957	1.68186		0.231571	0.408037	0.53563	0.750059		0.3836	0.579048
IPI:IPI00006024.4	DOCK4	Isoform 2 of Dedicator of cytokinesis protein 4	5314	6	C	UR	776.729	1027.21	1387.19	1222.35	792.49	979.464		1.32248	1.78594	0.809106	1.24798		0.403248	0.836682	-0.3056	0.319593		0.0488241	0.578138
IPI:IPI00328307.7	ELOVL5	Elongation of very long chain fatty acids protein 5	2535	5	C	UR	1599.21	1194.35	1282.88	2713.94	2611.2	977.105		0.746838	0.802196	2.67238	2.77753		-0.421134	-0.317973	1.41813	1.4738		0.498497	0.577915
IPI:IPI00550191.2	C9orf78	Uncharacterized protein C9orf78	3347	52	C	UR	13516.3	14456.2	13058.6	27982	17808.6	12134.9		1.06954	0.966137	1.46755	2.30591		0.0969881	-0.0497	0.553412	1.20534		0.3252	0.577818
IPI:IPI00333449.4	ZNF605	Zinc finger protein 605	899	1	C	UR	16.8796	35.4629	35.2744	30.0813	39.7718	28.22		2.10093	2.08977	1.40935	1.06596		1.07103	1.06334	0.495028	0.0921489		0.783029	0.577745
IPI:IPI00291467.7	SLC25A6	ADP/ATP translocase 3	759	101	C	UR	12235.6	11661.5	23457.2	20542.1	16288.8	17700.9		0.95308	1.91713	0.920224	1.16051		-0.0693315	0.938946	-0.119942	0.214761		-0.0946369	0.576853
IPI:IPI00220362.5	HSPE1	10 kDa heat shock protein, mitochondrial	4140	238	C	UR	55683.1	88992.8	112801	60390.5	73567	55150.5		1.5982	2.02577	1.33393	1.09501		0.676449	1.01847	0.415685	0.130948		0.546067	0.574708
IPI:IPI00746221.2	LOC348262	hypothetical protein LOC348262	5627	20	C	UR	4280.22	8060.03	6754.19	7595.48	5465.4	5417.62		1.88309	1.578	1.00882	1.402		0.9131	0.658098	0.0126679	0.487482		0.462884	0.57279
IPI:IPI00165176.6	INO80B	cDNA FLJ59544, highly similar to Zinc finger HIT domain-containing protein 4	5789	1	C	UR	448.228	504.791	627.835	838.821	611.916	531.273		1.12619	1.4007	1.15179	1.57889		0.171453	0.486153	0.20388	0.65891		0.187667	0.572531
IPI:IPI00007935.5	PDLIM5	PDZ and LIM domain protein 5	1260	113	C	UR	31268.2	29866.2	43187.2	35920.3	20442	22445.2		0.955162	1.38119	0.910752	1.60036		-0.0661825	0.465908	-0.134871	0.678392		-0.100527	0.57215
IPI:IPI00171186.1	PDCD7	Programmed cell death protein 7	19	6	C	UR	1515.95	1767.85	2665.38	2500.02	2220.44	1988.65		1.16617	1.75822	1.11656	1.25714		0.221774	0.814119	0.159056	0.33015		0.190415	0.572135
IPI:IPI00872409.2	RAP1GAP	RAP1 GTPase activating protein isoform a	308	23	C	UR	4310.23	8553.08	8425.33	5842.35	4421.22	5167.74		1.98437	1.95473	0.855542	1.13054		0.988679	0.966968	-0.225089	0.177015		0.381795	0.571992
IPI:IPI00300763.4	METAP2	Methionine aminopeptidase	2386	2	C	UR	745.813	610.115	977.069	864.2	638.512	512.711		0.818054	1.31007	1.24536	1.68555		-0.289733	0.389647	0.316568	0.753219		0.0134176	0.571433
IPI:IPI00167237.5	TYW3	tRNA wybutosine-synthesizing protein 3 homolog	4518	11	C	UR	3108.23	3654.57	4076.24	4604.97	4115.56	2736.52		1.17577	1.31143	1.50394	1.68278		0.233608	0.391146	0.588746	0.750849		0.411177	0.570998
IPI:IPI00026513.6	RPIA	Ribose-5-phosphate isomerase	712	47	C	UR	10078.3	9718.02	10767.3	19473.7	19637.1	9442.69		0.964252	1.06836	2.07961	2.0623		-0.052518	0.0954042	1.05631	1.04426		0.501897	0.569831
IPI:IPI00106491.3	MRTO4	mRNA turnover protein 4 homolog	278	85	C	UR	20309.1	30236.2	32912.7	29434.3	26882.8	21650.5		1.4888	1.62059	1.24167	1.35952		0.574151	0.696518	0.312283	0.443098		0.443217	0.569808
IPI:IPI00056319.1	NKD2	Isoform 1 of Protein naked cuticle homolog 2	6477	1	C	UR	98.7943	86.4051	159.002	169.915	173.377	124.33		0.874596	1.60942	1.39449	1.36665		-0.193311	0.686545	0.479738	0.450639		0.143213	0.568592
IPI:IPI00217544.4	ERG	Isoform 5 of Transcriptional regulator ERG	584	12	C	UR	2138.37	2426.57	2475.96	5719.1	4765.25	3011.06		1.13478	1.15787	1.58258	1.89936		0.182407	0.211477	0.66228	0.925517		0.422344	0.568497
IPI:IPI00022421.2	COX7A2L	Cytochrome c oxidase subunit 7A-related protein, mitochondrial	967	11	C	UR	2525.6	3252.34	3589.49	3637.67	3861.54	2352.41		1.28775	1.42124	1.64153	1.54636		0.364852	0.507153	0.715037	0.628875		0.539944	0.568014
IPI:IPI00184533.1	USP11	ubiquitin specific peptidase 11	770	67	C	UR	11284.4	15994.1	17902	20286.3	16650.2	14727.9		1.41736	1.58644	1.13052	1.37741		0.50321	0.665791	0.176988	0.461954		0.340099	0.563873
IPI:IPI00001564.1	CDKN2C	Cyclin-dependent kinase 4 inhibitor C	4573	12	C	UR	2612.05	6329.98	6906.87	3534.18	3551.15	4277.08		2.42338	2.64423	0.830274	0.826307		1.27702	1.40285	-0.26834	-0.275251		0.504339	0.563799
IPI:IPI00639961.2	BAG3	35 kDa protein	548	32	C	UR	4875.6	8357.81	8252.66	5273.73	3556.77	4086.74		1.71421	1.69265	0.87032	1.29045		0.777545	0.759279	-0.200383	0.367873		0.288581	0.563576
IPI:IPI00290526.9	CCDC8	Coiled-coil domain-containing protein 8	1140	10	C	UR	587.518	1722.11	1271.38	955.622	939.965	947.805		2.93116	2.16398	0.991728	1.00825		1.55147	1.11369	-0.0119832	0.0118498		0.769745	0.56277
IPI:IPI00034159.1	ATP6V0D1	V-type proton ATPase subunit d 1	918	42	C	UR	11690.4	11864.5	15938.7	13940.6	10841.5	8721.33		1.01489	1.3634	1.2431	1.59845		0.021327	0.44721	0.313944	0.676673		0.167636	0.561941
IPI:IPI00018350.3	MCM5	DNA replication licensing factor MCM5	1798	296	C	UR	54141.4	70926.5	79200.6	99470.8	96362.4	66829.5		1.31002	1.46285	1.44191	1.48843		0.389593	0.548779	0.527985	0.573788		0.458789	0.561284
IPI:IPI00026111.3	TMCO1	Isoform 1 of Transmembrane and coiled-coil domain-containing protein 1	5462	14	C	UR	4075.96	4699.63	5401.5	5325.87	6455.98	3246.01		1.15301	1.32521	1.9889	1.64074		0.205407	0.40622	0.991969	0.71435		0.598688	0.560285
IPI:IPI00029754.1	MLH1	DNA mismatch repair protein Mlh1	2119	33	C	UR	11030.8	10766.8	13911.1	12122.4	11737	7041.37		0.976067	1.26111	1.66686	1.7216		-0.0349479	0.334699	0.737136	0.783747		0.351094	0.559223
IPI:IPI00514013.1	KIAA1958	Isoform 2 of Uncharacterized protein KIAA1958	6890	1	C	UR	63.1888	151.37	131.883	143.636	127.159	138.097		2.39552	2.08713	0.920795	1.04011		1.26034	1.06152	-0.119048	0.0567354		0.570645	0.559127
[truncated: 8,841 more rows]

## Sheet: Up, log2FC>1
Up, log2 > 1							default~rq_126_sn sum	default~rq_127_sn sum	default~rq_128_sn sum	default~rq_129_sn sum	default~rq_130_sn sum	default~rq_131_sn sum
270
[truncated: 273 more rows]

## Sheet: Up, log2FC>0.5
							default~rq_126_sn sum	default~rq_127_sn sum	default~rq_128_sn sum	default~rq_129_sn sum	default~rq_130_sn sum	default~rq_131_sn sum
[truncated: 825 more rows]

[truncated: 1 more sheets: Down, log2FC<-1]
