# Supplementary material for: PARP1 inhibitors trigger innate immunity via PARP1 trapping-induced DNA damage response
Source: eLife. 2020 Aug 26;9:e60637. doi: 10.7554/eLife.60637 (PMC7486119; doi:10.7554/eLife.60637)
Supplement: Supplementary file 2. [file elife-60637-supp2.xlsx]

## Sheet: Up-regulated_BP
Category	Term	Count	%	PValue	Genes	List Total	Pop Hits	Pop Total	Fold Enrichment	Bonferroni	Benjamini	FDR
GOTERM_BP_DIRECT	GO:0050900~leukocyte migration	12	4.74308	1.01e-06	CD84, SLC16A1, CAV1, ITGA5, LCK, SLC3A2, ITGA4, SLC7A5, SIRPA, MMP1, SPN, FN1	233	122	16792	7.08872	0.0017372	0.0017372	0.00170477
GOTERM_BP_DIRECT	GO:0045060~negative thymic T cell selection	5	1.97628	1.09e-05	DOCK2, CD3E, ZAP70, GLI3, SPN	233	11	16792	32.7585	0.0185347	0.00931067	0.0183419
GOTERM_BP_DIRECT	GO:0060337~type I interferon signaling pathway	8	3.16206	2.79e-05	IFIT3, IFIT1, ISG15, HLA-A, OAS1, OAS2, HLA-B, XAF1	233	64	16792	9.00858	0.0469677	0.0159076	0.0471568
GOTERM_BP_DIRECT	GO:0030217~T cell differentiation	6	2.37154	5.18e-05	PTPRC, PREX1, LCK, ZAP70, VAV1, RHOH	233	30	16792	14.4137	0.0854285	0.0220775	0.087519
GOTERM_BP_DIRECT	GO:0006955~immune response	18	7.11462	8.04e-05	FYB, CRIP1, HLA-A, OAS1, HLA-B, CTSS, OAS2, VAV1, WAS, TNFRSF10A, SERPINB9, TNFRSF10B, IL1RAP, ZAP70, NGFR, TCF12, IL1A, SPN	233	421	16792	3.08132	0.129396	0.0273332	0.135773
GOTERM_BP_DIRECT	GO:0031295~T cell costimulation	8	3.16206	0.000101	CAV1, CD3G, CD3E, LGALS1, LCK, GRAP2, VAV1, SPN	233	78	16792	7.39166	0.159466	0.0285378	0.170183
GOTERM_BP_DIRECT	GO:0050852~T cell receptor signaling pathway	10	3.95257	0.000218	FYB, PTPRC, CD3G, CD3E, LCK, ZAP70, GRAP2, WAS, PAG1, THY1	233	148	16792	4.8695	0.313396	0.0522968	0.367983
GOTERM_BP_DIRECT	GO:0001525~angiogenesis	12	4.74308	0.000281	NRCAM, FZD8, WARS, CAV1, ITGA5, JUN, ENPEP, JAG1, ECM1, NCL, FN1, THY1	233	223	16792	3.87813	0.384268	0.0588173	0.474354
GOTERM_BP_DIRECT	GO:0097190~apoptotic signaling pathway	7	2.7668	0.000441	ANXA6, CAV1, CD3E, MLLT11, NGFR, SPN, DAPK1	233	71	16792	7.10536	0.532703	0.081058	0.743172
GOTERM_BP_DIRECT	GO:0030334~regulation of cell migration	7	2.7668	0.000552	SLK, SERPINE2, JAG1, NEXN, SPATA13, TGFB1, THY1	233	74	16792	6.81731	0.613609	0.0907095	0.928021
GOTERM_BP_DIRECT	GO:0042981~regulation of apoptotic process	11	4.34783	0.000777	TNFRSF10A, TNFRSF10B, SARM1, SLK, CD3E, LGALS1, NGFR, GDF15, ALX4, TGFB1, DAPK1	233	213	16792	3.72186	0.73819	0.114702	1.30539
GOTERM_BP_DIRECT	GO:0010628~positive regulation of gene expression	12	4.74308	0.00107753	SERPINB9, CAV1, CD3E, TNC, VIM, LEF1, CDK6, RDX, HMGA2, TGFB1, IL1A, FN1	233	262	16792	3.30086	0.843951	0.143413	1.80486
GOTERM_BP_DIRECT	GO:0045944~positive regulation of transcription from RNA polymerase II promoter	27	10.6719	0.00109761	SOX1, SOX2, JAG1, POU1F1, TCF7L2, GLI3, TGFB1, HSPH1, BCL11B, CEBPZ, ALX4, IL1A, FZD8, NOS1, SSBP2, IKZF1, HCLS1, BARHL2, LEF1, RB1, IFI16, HMGA2, NCL, JUN, ZFPM2, TCF12, PEG3	233	981	16792	1.98354	0.849263	0.135458	1.8382
GOTERM_BP_DIRECT	GO:0042493~response to drug	13	5.13834	0.00110113	SORD, LGALS1, FZD1, NCKAP1L, DPYSL2, ADA, TGFB1, POR, DAB1, JUN, LCK, SMPD1, DUSP6	233	304	16792	3.08188	0.850176	0.126802	1.84405
GOTERM_BP_DIRECT	GO:0007162~negative regulation of cell adhesion	5	1.97628	0.00163962	LPXN, DAB1, TNC, SPN, ARHGDIB	233	37	16792	9.73901	0.940833	0.171793	2.73415
GOTERM_BP_DIRECT	GO:0007155~cell adhesion	16	6.32411	0.00183725	TNC, NINJ2, CD99, ITGA4, PCDHGC3, SIRPA, THY1, TNFAIP6, LPXN, KIAA1462, PKP1, ITGA5, CNTNAP2, PARVB, FN1, CDH11	233	459	16792	2.5122	0.957933	0.179655	3.05891
GOTERM_BP_DIRECT	GO:0042270~protection from natural killer cell mediated cytotoxicity	3	1.18577	0.00184919	SERPINB9, HLA-A, HLA-B	233	5	16792	43.2412	0.958791	0.171049	3.0785
GOTERM_BP_DIRECT	GO:0045879~negative regulation of smoothened signaling pathway	4	1.58103	0.00214201	SERPINE2, CD3E, RB1, GLI3	233	19	16792	15.1724	0.975144	0.185563	3.55773
GOTERM_BP_DIRECT	GO:0007399~nervous system development	12	4.74308	0.0022143	PCSK2, STMN3, MAP1B, SMPD1, NINJ2, EVL, DPYSL2, JAG1, NRGN, SLC7A5, DLG2, ITM2A	233	287	16792	3.01332	0.97806	0.182107	3.67569
GOTERM_BP_DIRECT	GO:0042110~T cell activation	5	1.97628	0.00397685	CD3G, CD3E, ZAP70, WAS, ADA	233	47	16792	7.66688	0.998957	0.290566	6.51023
GOTERM_BP_DIRECT	GO:0007166~cell surface receptor signaling pathway	11	4.34783	0.00490069	TNFRSF10A, PTPRC, CD3G, TNFRSF10B, CD3E, TSPAN7, EVL, TSPAN8, CD53, NPY1R, SPN	233	274	16792	2.89327	0.999789	0.33174	7.96442
GOTERM_BP_DIRECT	GO:0042060~wound healing	6	2.37154	0.00500277	MACF1, TNC, SERPINB2, SCARB1, GLI3, FN1	233	80	16792	5.40515	0.999823	0.32483	8.1238
GOTERM_BP_DIRECT	GO:0043547~positive regulation of GTPase activity	17	6.71937	0.00541046	DLC1, CAV2, SNX18, ARFGAP3, PREX1, NCKAP1L, ARHGAP15, VAV1, THY1, ARHGAP30, DOCK2, FNBP1, JUN, RIN1, NEFL, SPATA13, ARHGDIB	233	565	16792	2.16844	0.999913	0.333966	8.7577
GOTERM_BP_DIRECT	GO:0035987~endodermal cell differentiation	4	1.58103	0.00596154	ITGA5, ITGA4, HMGA2, FN1	233	27	16792	10.6768	0.999966	0.349016	9.60802
GOTERM_BP_DIRECT	GO:0033077~T cell differentiation in thymus	4	1.58103	0.00596154	FZD8, BCL11B, CDK6, GLI3	233	27	16792	10.6768	0.999966	0.349016	9.60802
GOTERM_BP_DIRECT	GO:0046638~positive regulation of alpha-beta T cell differentiation	3	1.18577	0.00641839	ZAP70, GLI3, ADA	233	9	16792	24.0229	0.999985	0.358394	10.3073
GOTERM_BP_DIRECT	GO:0001960~negative regulation of cytokine-mediated signaling pathway	3	1.18577	0.00641839	PTPRC, CAV1, ECM1	233	9	16792	24.0229	0.999985	0.358394	10.3073
GOTERM_BP_DIRECT	GO:0050853~B cell receptor signaling pathway	5	1.97628	0.00654213	PTPRC, LCK, ZAP70, NCKAP1L, PRKCB	233	54	16792	6.67302	0.999988	0.352714	10.4958
GOTERM_BP_DIRECT	GO:0048146~positive regulation of fibroblast proliferation	5	1.97628	0.00654213	JUN, CDK6, RNASEH2B, TGFB1, FN1	233	54	16792	6.67302	0.999988	0.352714	10.4958
GOTERM_BP_DIRECT	GO:0043392~negative regulation of DNA binding	4	1.58103	0.0066097	JUN, LEF1, IFI16, HMGA2	233	28	16792	10.2955	0.999989	0.34505	10.5986
GOTERM_BP_DIRECT	GO:0019882~antigen processing and presentation	5	1.97628	0.00698026	RAB3B, HLA-A, FCGRT, HLA-B, CTSS	233	55	16792	6.5517	0.999994	0.350168	11.1603
GOTERM_BP_DIRECT	GO:0061564~axon development	3	1.18577	0.00795029	NEFL, NEFM, GAP43	233	10	16792	21.6206	0.999999	0.377645	12.6151
GOTERM_BP_DIRECT	GO:0051607~defense response to virus	8	3.16206	0.00809784	IFIT3, PTPRC, IFIT1, POLR3K, ISG15, OAS1, OAS2, IFI16	233	165	16792	3.49424	0.999999	0.373107	12.8344
GOTERM_BP_DIRECT	GO:0008285~negative regulation of cell proliferation	13	5.13834	0.00919486	DLC1, RBBP4, CDK6, RB1, POU1F1, GLI3, TGFB1, IFIT3, WARS, SERPINE2, BCL11B, JUN, IL1A	233	396	16792	2.36589	1	0.401555	14.4488
GOTERM_BP_DIRECT	GO:0042102~positive regulation of T cell proliferation	5	1.97628	0.00946186	PTPRC, CD3E, NCKAP1L, SASH3, SPN	233	60	16792	6.00572	1	0.400637	14.8374
GOTERM_BP_DIRECT	GO:0045892~negative regulation of transcription, DNA-templated	15	5.92885	0.00969623	IKZF1, FZD1, LEF1, IFI16, BASP1, RB1, HMGA2, NR0B1, GLI3, TCF7L2, TGFB1, ATXN1, ZNF703, JUN, ZFPM2	233	499	16792	2.16639	1	0.398742	15.1772
GOTERM_BP_DIRECT	GO:0007165~signal transduction	27	10.6719	0.0101861	DLC1, CD53, ARHGAP15, APBB1IP, LPXN, BCL11B, PAG1, SPN, FYB, LGALS1, DPYSL2, HMGA2, ECM1, PRKCB, DAPK1, TNFRSF10A, GRP, LSP1, ARHGAP30, TNFAIP6, SARM1, TNFRSF10B, PKP1, SMPD1, RIN1, NRGN, GDF15	233	1161	16792	1.67602	1	0.40479	15.8832
GOTERM_BP_DIRECT	GO:0009611~response to wounding	5	1.97628	0.0111947	TNC, SOX2, TGFB1, GAP43, FN1	233	63	16792	5.71974	1	0.425471	17.3196
GOTERM_BP_DIRECT	GO:0006164~purine nucleotide biosynthetic process	3	1.18577	0.0114504	MTHFD1, OAS1, OAS2	233	12	16792	18.0172	1	0.423737	17.6801
GOTERM_BP_DIRECT	GO:0030516~regulation of axon extension	3	1.18577	0.0134101	NRCAM, BARHL2, DPYSL2	233	13	16792	16.6312	1	0.466716	20.394
GOTERM_BP_DIRECT	GO:0042127~regulation of cell proliferation	8	3.16206	0.0145705	TNFRSF10A, PLA2G4A, TNFRSF10B, JUN, TNC, LCK, JAG1, NGFR	233	185	16792	3.11648	1	0.485992	21.961
GOTERM_BP_DIRECT	GO:0006954~inflammatory response	12	4.74308	0.0163774	TNFRSF10A, TNFAIP6, TNFRSF10B, IL1RAP, LYZ, ZAP70, NGFR, IFI16, ECM1, TGFB1, IL1A, EPHA2	233	379	16792	2.28186	1	0.517868	24.3436
GOTERM_BP_DIRECT	GO:0030890~positive regulation of B cell proliferation	4	1.58103	0.0165045	PTPRC, NCKAP1L, SASH3, ADA	233	39	16792	7.39166	1	0.511719	24.5086
GOTERM_BP_DIRECT	GO:0002250~adaptive immune response	7	2.7668	0.016961	CD84, SH2D1A, ZAP70, CD1C, CTSS, PAG1, PRKCB	233	148	16792	3.40865	1	0.512707	25.0984
GOTERM_BP_DIRECT	GO:0045071~negative regulation of viral genome replication	4	1.58103	0.0176646	IFIT1, ISG15, OAS1, IFI16	233	40	16792	7.20687	1	0.518643	25.9989
GOTERM_BP_DIRECT	GO:0045445~myoblast differentiation	3	1.18577	0.0177281	LGALS1, JAG1, RB1	233	15	16792	14.4137	1	0.511655	26.0796
GOTERM_BP_DIRECT	GO:2000679~positive regulation of transcription regulatory region DNA binding	3	1.18577	0.0177281	RB1, HMGA2, TGFB1	233	15	16792	14.4137	1	0.511655	26.0796
GOTERM_BP_DIRECT	GO:0009615~response to virus	6	2.37154	0.018304	IFIT3, IFIT1, OAS1, CDK6, OAS2, HMGA2	233	110	16792	3.93102	1	0.514904	26.8084
GOTERM_BP_DIRECT	GO:0070848~response to growth factor	3	1.18577	0.0200783	SOX2, EPHA2, DUSP6	233	16	16792	13.5129	1	0.540033	29.0115
GOTERM_BP_DIRECT	GO:0006816~calcium ion transport	5	1.97628	0.0210065	ANXA6, CACNA2D1, CAV1, SLC3A2, PRKCB	233	76	16792	4.74136	1	0.548515	30.1389
GOTERM_BP_DIRECT	GO:0022617~extracellular matrix disassembly	5	1.97628	0.0210065	CTSS, TPSAB1, LCP1, MMP1, FN1	233	76	16792	4.74136	1	0.548515	30.1389
GOTERM_BP_DIRECT	GO:0006461~protein complex assembly	6	2.37154	0.022463	LPXN, CD3G, CD3E, IL1RAP, NCKAP1L, WAS	233	116	16792	3.72769	1	0.565201	31.8741
GOTERM_BP_DIRECT	GO:0090090~negative regulation of canonical Wnt signaling pathway	7	2.7668	0.0258401	CTHRC1, CAV1, SOX2, FZD1, LEF1, GLI3, TCF7L2	233	163	16792	3.09497	1	0.609273	35.7429
GOTERM_BP_DIRECT	GO:0035023~regulation of Rho protein signal transduction	5	1.97628	0.0258404	DLC1, PREX1, SPATA13, VAV1, ARHGDIB	233	81	16792	4.44868	1	0.601711	35.7432
GOTERM_BP_DIRECT	GO:0050731~positive regulation of peptidyl-tyrosine phosphorylation	5	1.97628	0.0268807	CD3E, ITGA5, HCLS1, TGFB1, EHD4	233	82	16792	4.39443	1	0.608976	36.8927
GOTERM_BP_DIRECT	GO:0050771~negative regulation of axonogenesis	3	1.18577	0.0278479	DAB1, NGFR, THY1	233	19	16792	11.3793	1	0.614868	37.9439
GOTERM_BP_DIRECT	GO:0042246~tissue regeneration	3	1.18577	0.0278479	SOX2, NINJ2, GAP43	233	19	16792	11.3793	1	0.614868	37.9439
GOTERM_BP_DIRECT	GO:0006919~activation of cysteine-type endopeptidase activity involved in apoptotic process	5	1.97628	0.0279458	TNFRSF10A, DLC1, TNFRSF10B, LCK, NGFR	233	83	16792	4.34149	1	0.609043	38.0495
GOTERM_BP_DIRECT	GO:0051726~regulation of cell cycle	6	2.37154	0.0288977	PTPRC, ZNF703, RBBP4, JUN, KIAA0101, RB1	233	124	16792	3.48719	1	0.614529	39.0664
GOTERM_BP_DIRECT	GO:0051897~positive regulation of protein kinase B signaling	5	1.97628	0.0290358	AKR1C3, HCLS1, TSPYL5, TCF7L2, TGFB1	233	84	16792	4.2898	1	0.60944	39.2126
GOTERM_BP_DIRECT	GO:1902895~positive regulation of pri-miRNA transcription from RNA polymerase II promoter	3	1.18577	0.0306649	JUN, NGFR, TGFB1	233	20	16792	10.8103	1	0.623066	40.9129
GOTERM_BP_DIRECT	GO:0050850~positive regulation of calcium-mediated signaling	3	1.18577	0.0306649	CD3E, ZAP70, ADA	233	20	16792	10.8103	1	0.623066	40.9129
GOTERM_BP_DIRECT	GO:0016477~cell migration	7	2.7668	0.0324293	CTHRC1, ENPEP, SPATA13, TGFB1, LCP1, EPHA2, SDC2	233	172	16792	2.93303	1	0.63735	42.7037
GOTERM_BP_DIRECT	GO:0097150~neuronal stem cell population maintenance	3	1.18577	0.0335895	SOX2, IGF2BP1, JAG1	233	21	16792	10.2955	1	0.643988	43.8535
GOTERM_BP_DIRECT	GO:0035307~positive regulation of protein dephosphorylation	3	1.18577	0.0335895	DLC1, SMPD1, TGFB1	233	21	16792	10.2955	1	0.643988	43.8535
GOTERM_BP_DIRECT	GO:0034113~heterotypic cell-cell adhesion	3	1.18577	0.0366183	NRCAM, ITGA5, ITGA4	233	22	16792	9.82755	1	0.669858	46.7533
GOTERM_BP_DIRECT	GO:0071345~cellular response to cytokine stimulus	3	1.18577	0.0366183	HCLS1, LEF1, ITGA4	233	22	16792	9.82755	1	0.669858	46.7533
GOTERM_BP_DIRECT	GO:0050776~regulation of immune response	7	2.7668	0.0373773	SH2D1A, CD3G, CD3E, HLA-A, CD1C, HLA-B, ITGA4	233	178	16792	2.83416	1	0.671253	47.4576
GOTERM_BP_DIRECT	GO:0051056~regulation of small GTPase mediated signal transduction	6	2.37154	0.0384371	ARHGAP30, DLC1, ARHGAP15, VAV1, ARHGDIB, RHOH	233	134	16792	3.22696	1	0.675529	48.4264
GOTERM_BP_DIRECT	GO:0042475~odontogenesis of dentin-containing tooth	4	1.58103	0.0403882	BCL11B, TNC, LEF1, GLI3	233	55	16792	5.24136	1	0.687915	50.166
GOTERM_BP_DIRECT	GO:0002486~antigen processing and presentation of endogenous peptide antigen via MHC class I via ER pathway, TAP-independent	2	0.790514	0.0408807	HLA-A, HLA-B	233	3	16792	48.0458	1	0.686502	50.5963
GOTERM_BP_DIRECT	GO:0043932~ossification involved in bone remodeling	2	0.790514	0.0408807	CTHRC1, TGFB1	233	3	16792	48.0458	1	0.686502	50.5963
GOTERM_BP_DIRECT	GO:0098903~regulation of membrane repolarization during action potential	2	0.790514	0.0408807	CACNA2D1, CAV1	233	3	16792	48.0458	1	0.686502	50.5963
GOTERM_BP_DIRECT	GO:0019065~receptor-mediated endocytosis of virus by host cell	2	0.790514	0.0408807	CAV2, CAV1	233	3	16792	48.0458	1	0.686502	50.5963
GOTERM_BP_DIRECT	GO:0034111~negative regulation of homotypic cell-cell adhesion	2	0.790514	0.0408807	ZNF703, RDX	233	3	16792	48.0458	1	0.686502	50.5963
GOTERM_BP_DIRECT	GO:0033693~neurofilament bundle assembly	2	0.790514	0.0408807	NEFL, NEFM	233	3	16792	48.0458	1	0.686502	50.5963
GOTERM_BP_DIRECT	GO:0002317~plasma cell differentiation	2	0.790514	0.0408807	LGALS1, ITM2A	233	3	16792	48.0458	1	0.686502	50.5963
GOTERM_BP_DIRECT	GO:0033144~negative regulation of intracellular steroid hormone receptor signaling pathway	2	0.790514	0.0408807	HMGA2, NR0B1	233	3	16792	48.0458	1	0.686502	50.5963
GOTERM_BP_DIRECT	GO:0033632~regulation of cell-cell adhesion mediated by integrin	2	0.790514	0.0408807	FERMT3, ADA	233	3	16792	48.0458	1	0.686502	50.5963
GOTERM_BP_DIRECT	GO:0000122~negative regulation of transcription from RNA polymerase II promoter	17	6.71937	0.0420559	FZD8, CAV1, HIST1H1D, IKZF1, HCLS1, SOX2, LEF1, RB1, IFI16, HMGA2, POU1F1, NR0B1, GLI3, TCF7L2, TGFB1, ZFPM2, PEG3	233	720	16792	1.70162	1	0.691207	51.6091
GOTERM_BP_DIRECT	GO:0001570~vasculogenesis	4	1.58103	0.0422534	CAV1, ZFPM2, TGFB1, EPHA2	233	56	16792	5.14776	1	0.687225	51.7773
GOTERM_BP_DIRECT	GO:0050680~negative regulation of epithelial cell proliferation	4	1.58103	0.0422534	SOX2, CDK6, RB1, TGFB1	233	56	16792	5.14776	1	0.687225	51.7773
GOTERM_BP_DIRECT	GO:0030335~positive regulation of cell migration	7	2.7668	0.0427849	TNFAIP6, ZNF703, ITGA5, FERMT3, LEF1, RDX, TGFB1	233	184	16792	2.74174	1	0.686234	52.2275
GOTERM_BP_DIRECT	GO:0007159~leukocyte cell-cell adhesion	3	1.18577	0.0462956	ITGA5, FERMT3, ITGA4	233	25	16792	8.64824	1	0.709881	55.1027
GOTERM_BP_DIRECT	GO:0030097~hemopoiesis	4	1.58103	0.0481033	CRIP2, LCK, JAG1, IFI16	233	59	16792	4.88601	1	0.718546	56.519
GOTERM_BP_DIRECT	GO:0030041~actin filament polymerization	3	1.18577	0.0497074	PREX1, HCLS1, WAS	233	26	16792	8.31562	1	0.725246	57.7404
GOTERM_BP_DIRECT	GO:0006366~transcription from RNA polymerase II promoter	13	5.13834	0.0529702	SSBP2, SOX1, SOX2, BARHL2, LEF1, POU1F1, HMGA2, GLI3, JUN, BCL11B, CEBPZ, ALX4, TCF12	233	513	16792	1.8263	1	0.743093	60.1259
GOTERM_BP_DIRECT	GO:0043372~positive regulation of CD4-positive, alpha-beta T cell differentiation	2	0.790514	0.0541344	NCKAP1L, SASH3	233	4	16792	36.0343	1	0.745868	60.9459
GOTERM_BP_DIRECT	GO:0060364~frontal suture morphogenesis	2	0.790514	0.0541344	GLI3, TGFB1	233	4	16792	36.0343	1	0.745868	60.9459
GOTERM_BP_DIRECT	GO:0021861~forebrain radial glial cell differentiation	2	0.790514	0.0541344	LEF1, GLI3	233	4	16792	36.0343	1	0.745868	60.9459
GOTERM_BP_DIRECT	GO:0018916~nitrobenzene metabolic process	2	0.790514	0.0541344	GSTM1, GSTM4	233	4	16792	36.0343	1	0.745868	60.9459
GOTERM_BP_DIRECT	GO:0002248~connective tissue replacement involved in inflammatory response wound healing	2	0.790514	0.0541344	TGFB1, IL1A	233	4	16792	36.0343	1	0.745868	60.9459
GOTERM_BP_DIRECT	GO:0031507~heterochromatin assembly	2	0.790514	0.0541344	BAHCC1, HMGA2	233	4	16792	36.0343	1	0.745868	60.9459
GOTERM_BP_DIRECT	GO:0006968~cellular defense response	4	1.58103	0.0543282	LSP1, SH2D1A, DCDC2, SPN	233	62	16792	4.64959	1	0.742203	61.0809
GOTERM_BP_DIRECT	GO:0060395~SMAD protein signal transduction	4	1.58103	0.0543282	JUN, VIM, GDF15, TGFB1	233	62	16792	4.64959	1	0.742203	61.0809
GOTERM_BP_DIRECT	GO:0050690~regulation of defense response to virus by virus	3	1.18577	0.0567915	DOCK2, LCK, HLA-A	233	28	16792	7.72164	1	0.753198	62.7586
GOTERM_BP_DIRECT	GO:0016050~vesicle organization	3	1.18577	0.0567915	CAV2, SNX18, CAV1	233	28	16792	7.72164	1	0.753198	62.7586
GOTERM_BP_DIRECT	GO:0021983~pituitary gland development	3	1.18577	0.0567915	SOX2, HMGA2, NR0B1	233	28	16792	7.72164	1	0.753198	62.7586
GOTERM_BP_DIRECT	GO:0043065~positive regulation of apoptotic process	9	3.55731	0.0572424	PNMA2, MLLT11, SMPD1, NGFR, HMGA2, ANO6, VAV1, TGFB1, DUSP6	233	300	16792	2.16206	1	0.751246	63.0582
GOTERM_BP_DIRECT	GO:0055072~iron ion homeostasis	3	1.18577	0.0642027	HMOX2, STEAP1, FTL	233	30	16792	7.20687	1	0.786694	67.4051
GOTERM_BP_DIRECT	GO:0045773~positive regulation of axon extension	3	1.18577	0.0642027	MACF1, MAP1B, FN1	233	30	16792	7.20687	1	0.786694	67.4051
GOTERM_BP_DIRECT	GO:0006952~defense response	4	1.58103	0.0655098	CD84, HLA-B, TPSAB1, WAS	233	67	16792	4.30261	1	0.789135	68.1657
GOTERM_BP_DIRECT	GO:0033153~T cell receptor V(D)J recombination	2	0.790514	0.0672056	BCL11B, LEF1	233	5	16792	28.8275	1	0.793455	69.1278
GOTERM_BP_DIRECT	GO:0070836~caveola assembly	2	0.790514	0.0672056	CAV2, CAV1	233	5	16792	28.8275	1	0.793455	69.1278
GOTERM_BP_DIRECT	GO:0016202~regulation of striated muscle tissue development	2	0.790514	0.0672056	LEF1, TGFB1	233	5	16792	28.8275	1	0.793455	69.1278
GOTERM_BP_DIRECT	GO:0014012~peripheral nervous system axon regeneration	2	0.790514	0.0672056	TNC, NEFL	233	5	16792	28.8275	1	0.793455	69.1278
GOTERM_BP_DIRECT	GO:0035630~bone mineralization involved in bone maturation	2	0.790514	0.0672056	PHOSPHO1, ANO6	233	5	16792	28.8275	1	0.793455	69.1278
GOTERM_BP_DIRECT	GO:0043154~negative regulation of cysteine-type endopeptidase activity involved in apoptotic process	4	1.58103	0.0702553	SERPINB9, LEF1, NGFR, POR	233	69	16792	4.17789	1	0.804076	70.7893
GOTERM_BP_DIRECT	GO:0060333~interferon-gamma-mediated signaling pathway	4	1.58103	0.0751514	HLA-A, OAS1, OAS2, HLA-B	233	71	16792	4.06021	1	0.821963	73.2821
GOTERM_BP_DIRECT	GO:1902042~negative regulation of extrinsic apoptotic signaling pathway via death domain receptors	3	1.18577	0.0758825	TNFRSF10A, TNFRSF10B, DAPK1	233	33	16792	6.5517	1	0.821143	73.6366
GOTERM_BP_DIRECT	GO:0010718~positive regulation of epithelial to mesenchymal transition	3	1.18577	0.0758825	ZNF703, LEF1, TGFB1	233	33	16792	6.5517	1	0.821143	73.6366
GOTERM_BP_DIRECT	GO:0001837~epithelial to mesenchymal transition	3	1.18577	0.0799149	LEF1, HMGA2, TGFB1	233	34	16792	6.359	1	0.83368	75.5141
GOTERM_BP_DIRECT	GO:0006685~sphingomyelin catabolic process	2	0.790514	0.0800971	SMPDL3A, SMPD1	233	6	16792	24.0229	1	0.83067	75.5959
GOTERM_BP_DIRECT	GO:0007044~cell-substrate junction assembly	2	0.790514	0.0800971	ITGA5, FN1	233	6	16792	24.0229	1	0.83067	75.5959
GOTERM_BP_DIRECT	GO:0071799~cellular response to prostaglandin D stimulus	2	0.790514	0.0800971	AKR1C3, TNC	233	6	16792	24.0229	1	0.83067	75.5959
GOTERM_BP_DIRECT	GO:0046632~alpha-beta T cell differentiation	2	0.790514	0.0800971	BCL11B, LEF1	233	6	16792	24.0229	1	0.83067	75.5959
GOTERM_BP_DIRECT	GO:0008152~metabolic process	6	2.37154	0.0838432	GSTM1, BCAT1, GSTM4, CES1, LYZ, UGT3A2	233	168	16792	2.57388	1	0.841181	77.2215
GOTERM_BP_DIRECT	GO:0006865~amino acid transport	3	1.18577	0.0840125	SLC6A6, SLC3A2, SLC7A5	233	35	16792	6.17731	1	0.838243	77.2926
GOTERM_BP_DIRECT	GO:0030501~positive regulation of bone mineralization	3	1.18577	0.0840125	ISG15, ANO6, TGFB1	233	35	16792	6.17731	1	0.838243	77.2926
GOTERM_BP_DIRECT	GO:0048565~digestive tract development	3	1.18577	0.0840125	RB1, ALX4, TGFB1	233	35	16792	6.17731	1	0.838243	77.2926
GOTERM_BP_DIRECT	GO:0010951~negative regulation of endopeptidase activity	5	1.97628	0.0869449	SERPINB9, SERPINE2, SERPINB8, SERPINB2, SERPINH1	233	121	16792	2.97804	1	0.845219	78.4899
GOTERM_BP_DIRECT	GO:0001666~response to hypoxia	6	2.37154	0.0905114	HMOX2, CAV1, NOS1, TGFB1, ADA, PRKCB	233	172	16792	2.51402	1	0.853851	79.8661
GOTERM_BP_DIRECT	GO:0001843~neural tube closure	4	1.58103	0.090706	MTHFD1, DLC1, CC2D2A, TGFB1	233	77	16792	3.74383	1	0.851185	79.9388
GOTERM_BP_DIRECT	GO:0033622~integrin activation	2	0.790514	0.0928111	FERMT3, FN1	233	7	16792	20.591	1	0.854715	80.7091
GOTERM_BP_DIRECT	GO:0030854~positive regulation of granulocyte differentiation	2	0.790514	0.0928111	HCLS1, LEF1	233	7	16792	20.591	1	0.854715	80.7091
GOTERM_BP_DIRECT	GO:0042178~xenobiotic catabolic process	2	0.790514	0.0928111	GSTM1, GSTM4	233	7	16792	20.591	1	0.854715	80.7091
GOTERM_BP_DIRECT	GO:0008625~extrinsic apoptotic signaling pathway via death domain receptors	3	1.18577	0.0966711	TNFRSF10A, TNFRSF10B, DAPK1	233	38	16792	5.68963	1	0.86339	82.0498
GOTERM_BP_DIRECT	GO:0034446~substrate adhesion-dependent cell spreading	3	1.18577	0.0966711	FERMT3, ITGA4, FN1	233	38	16792	5.68963	1	0.86339	82.0498
	leukocyte migration	5.99568
	negative thymic T cell selection	4.96257
	type I interferon signaling pathway	4.5544
	T cell differentiation	4.28567
	immune response	4.09474
	T cell costimulation	3.99568
	T cell receptor signaling pathway	3.66154
	angiogenesis	3.55129
	apoptotic signaling pathway	3.35556
	regulation of cell migration	3.25806

## Sheet: Up-regulated_MF
Category	Term	Count	%	PValue	Genes	List Total	Pop Hits	Pop Total	Fold Enrichment	Bonferroni	Benjamini	FDR
GOTERM_MF_DIRECT	GO:0042608~T cell receptor binding	4	1.58103	5.23067e-05	DOCK2, CD3G, CD3E, HLA-A	237	6	16881	47.4852	0.0233659	0.0233659	0.0742287
GOTERM_MF_DIRECT	GO:0005515~protein binding	151	59.6838	0.000211487	DLC1, SYT1, PNMA2, RBM3, CD53, JAG1, TGFB1, NRCAM, GSTM4, DAB1, SERPINE2, ISG15, DNTT, TRIM44, NEGR1, IL1A, PAG1, FTL, CD3E, BARHL2, HLA-A, DCDC2, PRKCDBP, BASP1, NR0B1, POR, THY1, TNFAIP6, TAGLN, HSPB8, JUN, GRAP2, SPATA13, CAV2, ARFGAP3, CAV1, SOX1, SOX2, NINJ2, AKAP12, IGF2BP1, OAS1, OAS2, ADA, ADRB3, DOCK2, MACF1, ZAP70, RNF168, SCARB1, SLC30A3, OLFM3, DNAJA4, ARHGDIB, FN1, IKZF1, LGALS1, NCK…	237	8785	16881	1.22429	0.0911745	0.0466766	0.299807
GOTERM_MF_DIRECT	GO:0042802~identical protein binding	24	9.48617	0.000348935	BCAT1, SYT1, UAP1, CAV1, SORD, VIM, LYZ, RB1, DPYSL2, WAS, NCL, DAPK1, ATXN1, IFIT3, FNBP1, SLK, JUN, HSPB8, LCK, SSNA1, NEFL, LCP1, FTL, FN1	237	749	16881	2.28233	0.145933	0.0512235	0.494208
GOTERM_MF_DIRECT	GO:0001077~transcriptional activator activity, RNA polymerase II core promoter proximal region sequence-specific binding	12	4.74308	0.000503663	SSBP2, SOX1, BCL11B, JUN, BARHL2, SOX2, CEBPZ, LEF1, HMGA2, POU1F1, GLI3, TCF12	237	236	16881	3.62175	0.203647	0.0553382	0.712627
GOTERM_MF_DIRECT	GO:0001786~phosphatidylserine binding	5	1.97628	0.00171222	SYT1, SDPR, SYT6, SCARB1, GAP43	237	37	16881	9.62538	0.539106	0.143514	2.40339
GOTERM_MF_DIRECT	GO:0003779~actin binding	11	4.34783	0.00588626	LSP1, MACF1, TAGLN, HCLS1, EVL, RDX, TPM2, ADD3, WAS, PARVB, LCP1	237	278	16881	2.81837	0.93064	0.35901	8.03922
GOTERM_MF_DIRECT	GO:0005096~GTPase activator activity	11	4.34783	0.00602558	ARHGAP30, DLC1, ARFGAP3, DOCK2, PREX1, JUN, RIN1, NCKAP1L, ARHGAP15, ARHGDIB, THY1	237	279	16881	2.80827	0.934898	0.323117	8.22201
GOTERM_MF_DIRECT	GO:0042605~peptide antigen binding	4	1.58103	0.00682853	HLA-A, FCGRT, HLA-B, SLC7A5	237	28	16881	10.1754	0.954819	0.321001	9.2689
GOTERM_MF_DIRECT	GO:0017147~Wnt-protein binding	4	1.58103	0.00908639	FZD8, CTHRC1, FZD1, APCDD1	237	31	16881	9.19069	0.98385	0.367721	12.1535
GOTERM_MF_DIRECT	GO:0030881~beta-2-microglobulin binding	3	1.18577	0.00985017	HLA-A, CD1C, FCGRT	237	11	16881	19.4258	0.988602	0.360734	13.1099
GOTERM_MF_DIRECT	GO:0000978~RNA polymerase II core promoter proximal region sequence-specific DNA binding	12	4.74308	0.0114981	SSBP2, RBBP4, SOX1, BCL11B, JUN, CEBPZ, LEF1, IFI16, POU1F1, GLI3, TCF12, TCF7L2	237	355	16881	2.4077	0.994632	0.378242	15.1404
GOTERM_MF_DIRECT	GO:0035497~cAMP response element binding	3	1.18577	0.0137151	JUN, HMGA2, TCF12	237	13	16881	16.4372	0.998054	0.405584	17.8025
GOTERM_MF_DIRECT	GO:0030676~Rac guanyl-nucleotide exchange factor activity	3	1.18577	0.0158549	DOCK2, SPATA13, VAV1	237	14	16881	15.2631	0.999271	0.426317	20.2982
GOTERM_MF_DIRECT	GO:0008134~transcription factor binding	10	3.95257	0.0187065	TNFRSF10A, JUN, LEF1, ZFPM2, RB1, IFI16, HMGA2, NR0B1, TCF12, TCF7L2	237	284	16881	2.50802	0.999804	0.456471	23.5147
GOTERM_MF_DIRECT	GO:0008301~DNA binding, bending	3	1.18577	0.0256999	CRIP1, LEF1, HMGA2	237	18	16881	11.8713	0.999992	0.543674	30.8992
GOTERM_MF_DIRECT	GO:0071837~HMG box domain binding	3	1.18577	0.0256999	JUN, ALX4, TCF12	237	18	16881	11.8713	0.999992	0.543674	30.8992
GOTERM_MF_DIRECT	GO:0044212~transcription regulatory region DNA binding	8	3.16206	0.0305496	IKZF1, BCL11B, JUN, SOX2, LEF1, BASP1, TCF12, TCF7L2	237	213	16881	2.67522	0.999999	0.583757	35.6249
GOTERM_MF_DIRECT	GO:0046977~TAP binding	2	0.790514	0.0413595	HLA-A, HLA-B	237	3	16881	47.4852	1	0.674718	45.0982
GOTERM_MF_DIRECT	GO:0008022~protein C-terminus binding	7	2.7668	0.0429229	ATXN1, SYT1, VIM, LCK, ECM1, NEFL, NCL	237	182	16881	2.73953	1	0.66768	46.3557
GOTERM_MF_DIRECT	GO:0005031~tumor necrosis factor-activated receptor activity	3	1.18577	0.0439003	TNFRSF10A, TNFRSF10B, NGFR	237	24	16881	8.90348	1	0.656299	47.1282
GOTERM_MF_DIRECT	GO:0004867~serine-type endopeptidase inhibitor activity	5	1.97628	0.0471525	SERPINB9, SERPINE2, SERPINB8, SERPINB2, SERPINH1	237	97	16881	3.67154	1	0.664318	49.6248
GOTERM_MF_DIRECT	GO:0043236~laminin binding	3	1.18577	0.0472878	LGALS1, CTSS, ECM1	237	25	16881	8.54734	1	0.647486	49.7262
GOTERM_MF_DIRECT	GO:0005544~calcium-dependent phospholipid binding	4	1.58103	0.0474697	ANXA6, SYT1, PLA2G4A, SYT6	237	58	16881	4.91227	1	0.631825	49.8623
GOTERM_MF_DIRECT	GO:0003725~double-stranded RNA binding	4	1.58103	0.053732	VIM, SLC3A2, OAS1, OAS2	237	61	16881	4.67068	1	0.662226	54.344
GOTERM_MF_DIRECT	GO:0001730~2'-5'-oligoadenylate synthetase activity	2	0.790514	0.0547638	OAS1, OAS2	237	4	16881	35.6139	1	0.653787	55.0457
GOTERM_MF_DIRECT	GO:0045569~TRAIL binding	2	0.790514	0.0547638	TNFRSF10A, TNFRSF10B	237	4	16881	35.6139	1	0.653787	55.0457
GOTERM_MF_DIRECT	GO:0005198~structural molecule activity	8	3.16206	0.0589777	CAV1, MAP1A, VIM, MAP1B, JAG1, ADD3, NEFL, NEFM	237	247	16881	2.30697	1	0.666814	57.8084
GOTERM_MF_DIRECT	GO:0005178~integrin binding	5	1.97628	0.0597889	ITGA5, FERMT3, TSPAN8, FN1, THY1	237	105	16881	3.3918	1	0.6576	58.3218
GOTERM_MF_DIRECT	GO:0005102~receptor binding	10	3.95257	0.060633	GRP, FYB, FZD8, CAV1, SERPINE2, HLA-A, FZD1, ZAP70, HLA-B, DDX54	237	353	16881	2.01779	1	0.649052	58.8499
GOTERM_MF_DIRECT	GO:0042169~SH2 domain binding	3	1.18577	0.0617277	DLC1, LCK, PAG1	237	29	16881	7.3684	1	0.642473	59.5254
GOTERM_MF_DIRECT	GO:0001948~glycoprotein binding	4	1.58103	0.0626633	LGALS1, VIM, LCK, TGFB1	237	65	16881	4.38325	1	0.63528	60.0946
GOTERM_MF_DIRECT	GO:0005200~structural constituent of cytoskeleton	5	1.97628	0.0685118	INA, VIM, ADD3, NEFL, NEFM	237	110	16881	3.23763	1	0.656754	63.4874
GOTERM_MF_DIRECT	GO:0019901~protein kinase binding	10	3.95257	0.0827624	CAV2, PTPRC, CAV1, CD3E, HCLS1, LCK, DPYSL2, WAS, TCF7L2, THY1	237	376	16881	1.89436	1	0.716233	70.6645
GOTERM_MF_DIRECT	GO:0017124~SH3 domain binding	5	1.97628	0.0857633	CD3E, HCLS1, EVL, SIRPA, WAS	237	119	16881	2.99277	1	0.718192	71.9979
GOTERM_MF_DIRECT	GO:0042803~protein homodimerization activity	16	6.32411	0.0887176	CAV2, LGALS1, SYT6, RDX, NR0B1, TGFB1, ANXA6, GSTM1, ADRB3, SLC16A1, GSTM4, SLK, JUN, SCARB1, TCF12, ANO6	237	730	16881	1.56116	1	0.719865	73.2555
GOTERM_MF_DIRECT	GO:0004767~sphingomyelin phosphodiesterase activity	2	0.790514	0.0938674	SMPDL3A, SMPD1	237	7	16881	20.3508	1	0.730287	75.3228
GOTERM_MF_DIRECT	GO:0019899~enzyme binding	9	3.55731	0.096314	GSTM1, CAV1, GSTM4, PREX1, JUN, CNTNAP2, ECM1, TGFB1, POR	237	333	16881	1.92508	1	0.729605	76.252
GOTERM_MF_DIRECT	GO:0001102~RNA polymerase II activating transcription factor binding	3	1.18577	0.0986107	JUN, RB1, POU1F1	237	38	16881	5.62325	1	0.728419	77.0946

## Sheet: Up-regulated_CC
Category	Term	Count	%	PValue	Genes	List Total	Pop Hits	Pop Total	Fold Enrichment	Bonferroni	Benjamini	FDR
GOTERM_CC_DIRECT	GO:0005925~focal adhesion	22	8.69565	7.99657e-08	DLC1, PTPRC, CAV2, CAV1, TNC, VIM, FZD1, AKAP12, CD99, RDX, EVL, ITGA4, CSRP1, NEXN, APBB1IP, EPHA2, THY1, ANXA6, LPXN, ITGA5, PARVB, LCP1	246	391	18224	4.16826	2.10308e-05	2.10308e-05	0.000104711
GOTERM_CC_DIRECT	GO:0016020~membrane	58	22.9249	6.62091e-07	FERMT3, JAG1, ARHGAP15, SLC7A5, SLC26A2, MTHFD1, HMOX2, SLC16A1, DAB1, MGRN1, IL1RAP, CNTNAP2, ANO6, SLC1A1, DLG2, SPN, FTL, CD3G, HLA-A, SLC3A2, HLA-B, IFI16, NR0B1, NCL, SIRPA, POR, SERPINB9, RPS4Y1, KDSR, ADD3, STEAP1, CAV2, CAV1, ARFGAP3, SORD, TNC, PCDHGC3, OAS2, ADA, PCSK2, ANXA6, DOCK2, SYNPR, LPXN, SLC30A3, DNAJA4, ARHGDIB, EHD4, PTPRC, HCLS1, FADS2, NCKAP1L, EVL, DPYSL2, ITGA4, LSP1, DDX…	246	2200	18224	1.95305	0.000174115	8.70612e-05	0.000866973
GOTERM_CC_DIRECT	GO:0005829~cytosol	76	30.0395	1.45451e-06	DLC1, PREX1, SYT6, ARHGAP15, GLI3, SLC7A5, CMBL, AKR1C3, MTHFD1, GSTM1, WARS, HSPH1, SH2D1A, DAB1, GSTM4, SERPINE2, MGRN1, OPLAH, ISG15, SDPR, PHOSPHO1, IL1A, FTL, RHOH, CDK6, IFI16, WAS, THY1, PRKCB, ARHGAP30, SERPINB9, JUN, SERPINB8, CC2D2A, LCK, RPS4Y1, NGFR, GRAP2, ADD3, PARVB, LCP1, BCAT1, ARFGAP3, RAB3B, SORD, VIM, SOX2, IGF2BP1, OAS1, OAS2, TPM2, APBB1IP, ADA, DOCK2, ZAP70, XAF1, DNAJA4, N…	246	3315	18224	1.69839	0.000382464	0.000127504	0.0019046
GOTERM_CC_DIRECT	GO:0070062~extracellular exosome	65	25.6917	9.67625e-06	FERMT3, TSPAN8, CD53, ENPEP, SLC7A5, SLC26A2, CMBL, AKR1C3, MTHFD1, WARS, HSPH1, SLC16A1, SLK, MGRN1, SMPDL3A, NEGR1, ANO6, SLC1A1, SPN, FTL, HLA-A, LYZ, SLC3A2, HLA-B, BASP1, WAS, NCL, SIRPA, THY1, PRKCB, CD84, SERPINB9, SERPINB8, LCK, LCP1, SNX18, RAB3B, SORD, ABHD6, VIM, PPT2, RDX, PCDHGC3, SERPINH1, ITM2A, ANXA6, TTYH3, DOCK2, SCARB1, FN1, ARHGDIB, EHD4, PTPRC, CACNA2D1, LGALS1, NCKAP1L, DPYS…	246	2811	18224	1.71301	0.00254163	0.000636014	0.0126698
GOTERM_CC_DIRECT	GO:0005886~plasma membrane	85	33.5968	1.82315e-05	SYT1, PREX1, SYT6, CD53, JAG1, ENPEP, SLC26A2, SLC7A5, SDC2, TGFB1, NRCAM, HMOX2, SLC16A1, MGRN1, IL1RAP, SPG20, SLC1A1, NEGR1, ANO6, PAG1, DLG2, SPN, RHOH, PCDHGA12, CD3G, CD3E, HLA-A, SLC3A2, HLA-B, PCDH7, BASP1, SIRPA, PRKCB, THY1, DAPK1, CD84, TNFRSF10A, TNFRSF10B, LCK, SERPINB2, RIN1, NGFR, ADD3, STEAP1, PARVB, GAP43, LCP1, CAV2, CAV1, RAB3B, ABHD6, VIM, AKAP12, RDX, FCGRT, PCDHGC3, ADA, ITM…	246	4121	18224	1.52801	0.00478345	0.000958526	0.0238706
GOTERM_CC_DIRECT	GO:0005887~integral component of plasma membrane	39	15.415	3.17862e-05	CAV2, CAV1, NINJ2, TSPAN7, TSPAN8, JAG1, CD53, ENPEP, APCDD1, SLC7A5, SLC26A2, NRCAM, ADRB3, SLC16A1, IL1RAP, SCARB1, SLC30A3, SLC1A1, SPN, PAG1, PTPRC, CD3G, CD3E, HLA-A, CD1C, CD99, FADS2, NCKAP1L, HLA-B, PCDH7, NPY1R, EPHA2, THY1, TNFRSF10A, CD84, TNFRSF10B, SLC6A6, NGFR, STEAP1	246	1415	18224	2.04182	0.00832507	0.00139235	0.0416146
GOTERM_CC_DIRECT	GO:0005856~cytoskeleton	17	6.71937	4.4903e-05	NOS1, VIM, AKAP12, EVL, RDX, DPYSL2, BASP1, NEXN, APBB1IP, DOCK2, FNBP1, MACF1, CC2D2A, RIN1, ADD3, PARVB, ARHGDIB	246	371	18224	3.39456	0.0117403	0.00168569	0.0587824
GOTERM_CC_DIRECT	GO:0009986~cell surface	20	7.90514	0.000141854	PTPRC, LGALS1, SLC3A2, HLA-A, FZD1, HLA-B, CD53, ITGA4, ADA, EPHA2, TGFB1, SDC2, TNFRSF10A, TNFRSF10B, ITGA5, CNTNAP2, SCARB1, NGFR, ANO6, SPN	246	542	18224	2.73363	0.0366228	0.00465293	0.185592
GOTERM_CC_DIRECT	GO:0005901~caveola	7	2.7668	0.000236376	DLC1, CAV2, CAV1, NOS1, SDPR, SCARB1, PRKCDBP	246	65	18224	7.97799	0.0602808	0.00688444	0.309081
GOTERM_CC_DIRECT	GO:0005911~cell-cell junction	10	3.95257	0.000544387	PCDHGA12, KIAA1462, CD3E, ITGA5, ZAP70, CD53, ADD3, VAV1, WAS, STEAP1	246	172	18224	4.30705	0.13343	0.0142192	0.710506
GOTERM_CC_DIRECT	GO:0005737~cytoplasm	95	37.5494	0.000613214	DLC1, CTHRC1, RBM3, PREX1, GLI3, SLC7A5, TGFB1, GSTM1, AKR1C3, WARS, HSPH1, SH2D1A, GSTM4, MGRN1, SLK, DNTT, GRWD1, SDPR, SPG20, FTL, RHOH, SSBP2, STMN3, BARHL2, GPRASP1, SLC3A2, LEF1, DCDC2, PRKCDBP, CDK6, BASP1, IFI16, NR0B1, METTL7B, PRKCB, DAPK1, SERPINB9, LARP6, TAGLN, HSPB8, MLLT11, SERPINB2, RIN1, ZFPM2, GRAP2, ADD3, SPATA13, GAP43, LCP1, ARFGAP3, RAB3B, VIM, SOX2, AKAP12, KIAA0101, IGF2BP…	246	5222	18224	1.34771	0.148984	0.0145589	0.800003
GOTERM_CC_DIRECT	GO:0001772~immunological synapse	5	1.97628	0.00107663	CD3E, LCK, ZAP70, CD53, RHOH	246	34	18224	10.8943	0.24671	0.0233323	1.40065
GOTERM_CC_DIRECT	GO:0042101~T cell receptor complex	4	1.58103	0.00168682	CD3G, CD3E, ZAP70, APBB1IP	246	18	18224	16.4625	0.358539	0.0335777	2.18641
GOTERM_CC_DIRECT	GO:0045121~membrane raft	10	3.95257	0.00193188	CAV2, PTPRC, CAV1, NOS1, SDPR, LCK, ZAP70, SERPINH1, PAG1, THY1	246	206	18224	3.59618	0.398648	0.0356749	2.50036
GOTERM_CC_DIRECT	GO:0005883~neurofilament	3	1.18577	0.00477798	INA, NEFL, NEFM	246	8	18224	27.7805	0.716238	0.0805454	6.07891
GOTERM_CC_DIRECT	GO:0030426~growth cone	7	2.7668	0.00481991	STMN3, PREX1, IGF2BP1, DPYSL2, BASP1, NEFL, THY1	246	116	18224	4.47042	0.719365	0.076347	6.13072
GOTERM_CC_DIRECT	GO:0032587~ruffle membrane	6	2.37154	0.00496492	DLC1, MACF1, ITGA5, SPATA13, LCP1, EPHA2	246	82	18224	5.42058	0.729917	0.0741115	6.30966
GOTERM_CC_DIRECT	GO:0005615~extracellular space	30	11.8577	0.00807504	CTHRC1, SORD, TNC, RDX, SERPINH1, TGFB1, ADA, PCSK2, SERPINE2, SMPDL3A, OLFM3, SPN, IL1A, FN1, INA, CES1, LGALS1, LYZ, CTSS, ECM1, GRP, SERPINB9, TNFAIP6, SERPINB8, SMPD1, SERPINB2, KDSR, GDF15, TPSAB1, LCP1	246	1347	18224	1.64992	0.881442	0.111716	10.0726
GOTERM_CC_DIRECT	GO:0030054~cell junction	14	5.5336	0.00946758	FYB, SYT1, DLGAP1, FERMT3, MAP1B, SYT6, BASP1, ADA, SYNPR, SARM1, SLC30A3, OLFM3, GAP43, DLG2	246	459	18224	2.25956	0.918066	0.123375	11.7118
GOTERM_CC_DIRECT	GO:0030424~axon	9	3.55731	0.0105127	SARM1, STMN3, IGF2BP1, CNTNAP2, NRGN, NEFL, TGFB1, NEFM, GAP43	246	222	18224	3.0033	0.937929	0.129749	12.9239
GOTERM_CC_DIRECT	GO:0031410~cytoplasmic vesicle	9	3.55731	0.0144102	ARHGAP30, CAV2, SNX18, PLA2G4A, CAV1, FNBP1, ITGA5, ENPEP, ARHGDIB	246	235	18224	2.83716	0.978016	0.166218	17.3097
GOTERM_CC_DIRECT	GO:0043005~neuron projection	9	3.55731	0.0150789	NRCAM, SYT1, SYNPR, DAB1, STMN3, BCL11B, VIM, SLC30A3, NGFR	246	237	18224	2.81321	0.98161	0.166094	18.0413
GOTERM_CC_DIRECT	GO:0031012~extracellular matrix	10	3.95257	0.0190343	SERPINE2, CRIP2, LGALS1, TNC, VIM, TPSAB1, ECM1, TGFB1, MMP1, FN1	246	296	18224	2.50275	0.993618	0.197281	22.2481
GOTERM_CC_DIRECT	GO:0030027~lamellipodium	7	2.7668	0.0212497	IGF2BP1, EVL, RDX, APBB1IP, SPATA13, PARVB, EPHA2	246	160	18224	3.24106	0.996479	0.209722	24.5163
GOTERM_CC_DIRECT	GO:0005938~cell cortex	6	2.37154	0.0253504	CAV1, FNBP1, CRIP2, AKAP12, ADD3, NCL	246	123	18224	3.61372	0.998833	0.236715	28.5542
GOTERM_CC_DIRECT	GO:0009897~external side of plasma membrane	8	3.16206	0.0253814	NRCAM, PTPRC, CD3E, ITGA5, ENPEP, ADA, SPN, THY1	246	213	18224	2.7824	0.998843	0.228993	28.584
GOTERM_CC_DIRECT	GO:0001726~ruffle	5	1.97628	0.0331878	ITGA5, CDK6, RDX, SAMSN1, LCP1	246	90	18224	4.11563	0.99986	0.280184	35.7221
GOTERM_CC_DIRECT	GO:0045202~synapse	7	2.7668	0.0358844	NRCAM, DLGAP1, SARM1, NOS1, ITGA5, SPG20, OLFM3	246	181	18224	2.86502	0.999933	0.290542	38.0305
GOTERM_CC_DIRECT	GO:0014069~postsynaptic density	7	2.7668	0.0382087	DLGAP1, DAB1, MAP1B, NRGN, ADD3, DLG2, GAP43	246	184	18224	2.81831	0.999964	0.297639	39.9585
GOTERM_CC_DIRECT	GO:0002102~podosome	3	1.18577	0.0409133	LPXN, FERMT3, LCP1	246	24	18224	9.26016	0.999983	0.306647	42.1321
GOTERM_CC_DIRECT	GO:0016324~apical plasma membrane	9	3.55731	0.0433801	CAV1, SLC3A2, RDX, ENPEP, JAG1, SLC7A5, SLC1A1, FN1, THY1	246	291	18224	2.29117	0.999991	0.313571	44.0511
GOTERM_CC_DIRECT	GO:0032993~protein-DNA complex	3	1.18577	0.0440852	LEF1, HMGA2, TCF7L2	246	25	18224	8.88976	0.999993	0.309648	44.5886
GOTERM_CC_DIRECT	GO:0005667~transcription factor complex	7	2.7668	0.046525	HCLS1, JUN, SOX2, LEF1, POU1F1, ALX4, TCF12	246	193	18224	2.68689	0.999996	0.315928	46.4123
GOTERM_CC_DIRECT	GO:0043209~myelin sheath	6	2.37154	0.0546453	INA, CNRIP1, RDX, DPYSL2, NEFL, THY1	246	152	18224	2.92426	1	0.352532	52.0901
GOTERM_CC_DIRECT	GO:0031234~extrinsic component of cytoplasmic side of plasma membrane	4	1.58103	0.0636339	CAV2, SNX18, LCK, ZAP70	246	68	18224	4.35772	1	0.389853	57.7239
GOTERM_CC_DIRECT	GO:0042105~alpha-beta T cell receptor complex	2	0.790514	0.0654428	CD3G, CD3E	246	5	18224	29.6325	1	0.390099	58.7809
GOTERM_CC_DIRECT	GO:0030175~filopodium	4	1.58103	0.0705199	IGF2BP1, RDX, SPATA13, LCP1	246	71	18224	4.17359	1	0.40537	61.6187
GOTERM_CC_DIRECT	GO:0043231~intracellular membrane-bounded organelle	13	5.13834	0.0746037	ATXN1, ARHGAP30, SNX18, DAB1, PKP1, PREX1, PPT2, SCARB1, OAS2, CTSS, SLC7A5, UGT3A2, POR	246	558	18224	1.72591	1	0.415274	63.7692
GOTERM_CC_DIRECT	GO:0048471~perinuclear region of cytoplasm	14	5.5336	0.0776968	CAV2, CAV1, RAB3B, NOS1, PREX1, KIAA0101, IGF2BP1, OAS2, ANXA6, LPXN, DAB1, SLK, MT1B, EHD4	246	621	18224	1.67011	1	0.420408	65.3233
GOTERM_CC_DIRECT	GO:0005768~endosome	7	2.7668	0.083799	SNX18, CAV1, SMPD1, SLC30A3, NGFR, GRAP2, STEAP1	246	225	18224	2.30475	1	0.437543	68.2103
