# Supplementary material for: PARP1 inhibitors trigger innate immunity via PARP1 trapping-induced DNA damage response
Source: eLife. 2020 Aug 26;9:e60637. doi: 10.7554/eLife.60637 (PMC7486119; doi:10.7554/eLife.60637)
Supplement: Supplementary file 3. [file elife-60637-supp3.xlsx]

## Sheet: Sheet1
	Supplementary file 3. Oligo sequence in this study
	Description: Oligonucleotides table
	cloning oligos
	Gene Name	Forward Sequence	Reverse Sequence
	Human PARP1 R138C	tcttcttggacaggcacacctggcccttttc	gaaaagggccaggtgtgcctgtccaagaaga
	qRT-PCR oligos
	Gene Name	Forward Sequence	Reverse Sequence
	Human Inf-α	TGATGCTCCTGGCACAAATG	GGATCAGCTCATGGAGGACA
	Human Inf-β	CAGCAGTTCCAGAAGGAGGA	AGCCAGGAGGTTCTCAACAA
	Human Ccl5	GCTGTCATCCTCATTGCTACTG	TGGTGTAGAAATACTCCTTGATGTG
	Human Cxcl10	GAACTGTACGCTGTACCTGCA	TTGATGGCCTTCGATTCTGGA
	Human Isg15	TGTCGGTGTCAGAGCTGAAG	AGAGGTTCGTCGCATTTGTC
	Human Mx1	TTTCAGCACCTGATGGCCTA	GCTGTAGGTGTCCTTGTCCT
	Human Mx2	AAAAGCAGCCCTGTGAGGCATG	GTGATCTCCAGGCTGATGAGCT
	Human Ifit3	AGAAAAGGTGACCTAGACAAAGC	CCTTGTAGCAGCACCCAATCT
	shRNA sequences
	mRNA Target	Sourse	Cat#
	None-target	Sigma-Aldrich	SHC016
	Human cGAS_#1	Sigma-Aldrich	SHCLNG-NM_138441; TRCN0000428336
	Human cGAS_#2	Sigma-Aldrich	SHCLNG-NM_138441; TRCN0000149811
	guide RNA oligos for CRSPR/Cas9
	Gene Name	Forward Sequence	Reverse Sequence
	Human sgPARP1	CACCGAACTCGGGGGGAAGTTGACG	AAACCGTCAACTTCCCCCCGAGTTC
		*Additional oligo seqence
